# Supplementary material
Source: publisher site journal article supplement (https://www.dovepress.com/article/326647)
Supplement: Supplementary file 1 [file get_supplementary_file.php]

**
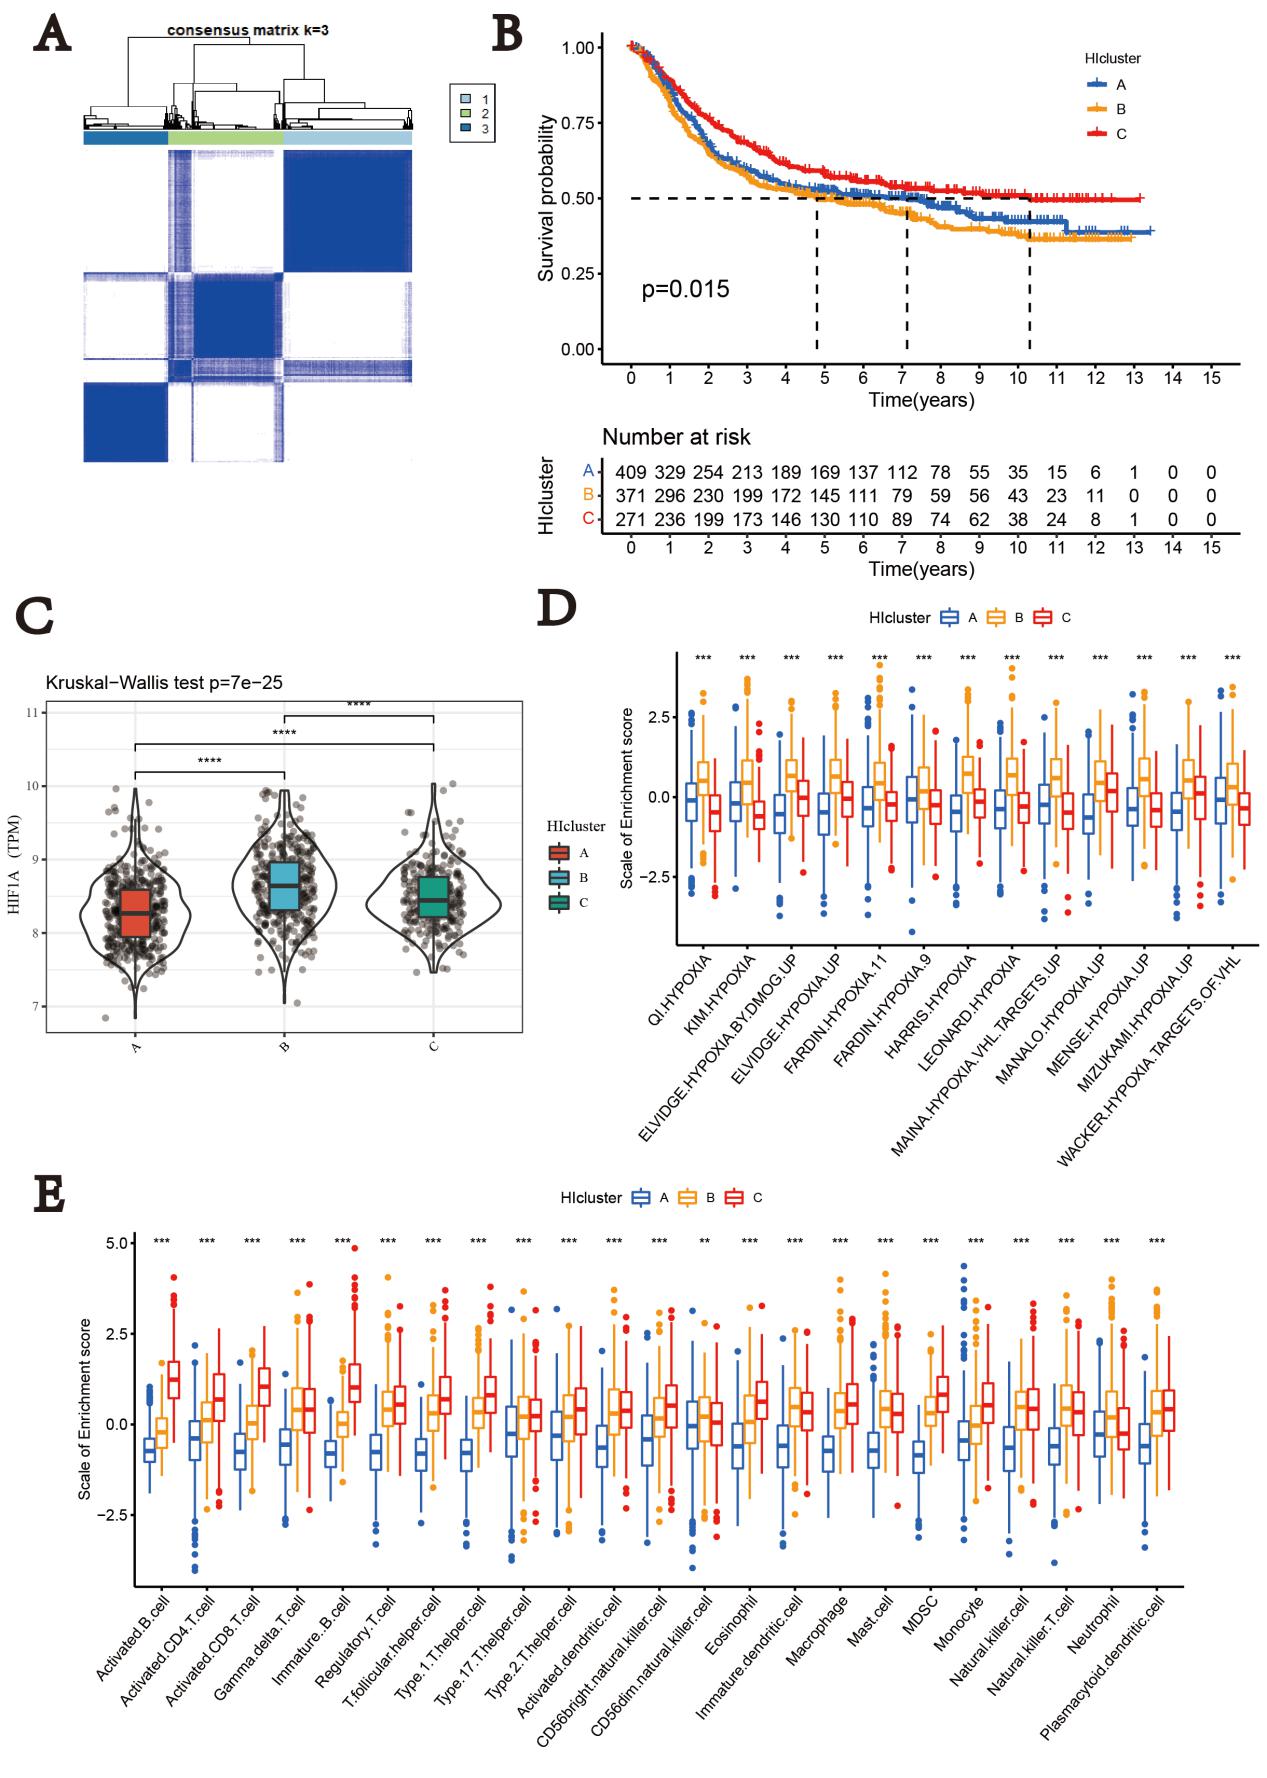
**

**Figure S1** Consensus matrices of the GC metacohort for k = 3. (B) Survival analyses for the three HIclusters in GC metacohort using Kaplan-Meier curves including 416 cases in HIcluster A, 372 cases in HIcluster B, and 271 cases in HIcluster C. The HIcluster C showed better overall survival than the other two HIcluster.(p=0.015, Log-rank test) (C) Differences in the expression of HIF-1A among three HIclusters in GC metacohort. The KruskalWallis test was used to compare the statistical difference between three gene clusters (P < 0.0001). (D) The enrichment score scaled of hypoxia-related gene sets in the three HIclusters. (E)The enrichment score scaled of immune cell infiltration-related gene sets in the three HIclusters. The upper and lower ends of the boxes represented interquartile range of values. The lines in the boxes represented median value, and black dots showed outliers. The asterisks represented the statistical p value.(**P < 0.01; ***P < 0.001;****P < 0.0001)


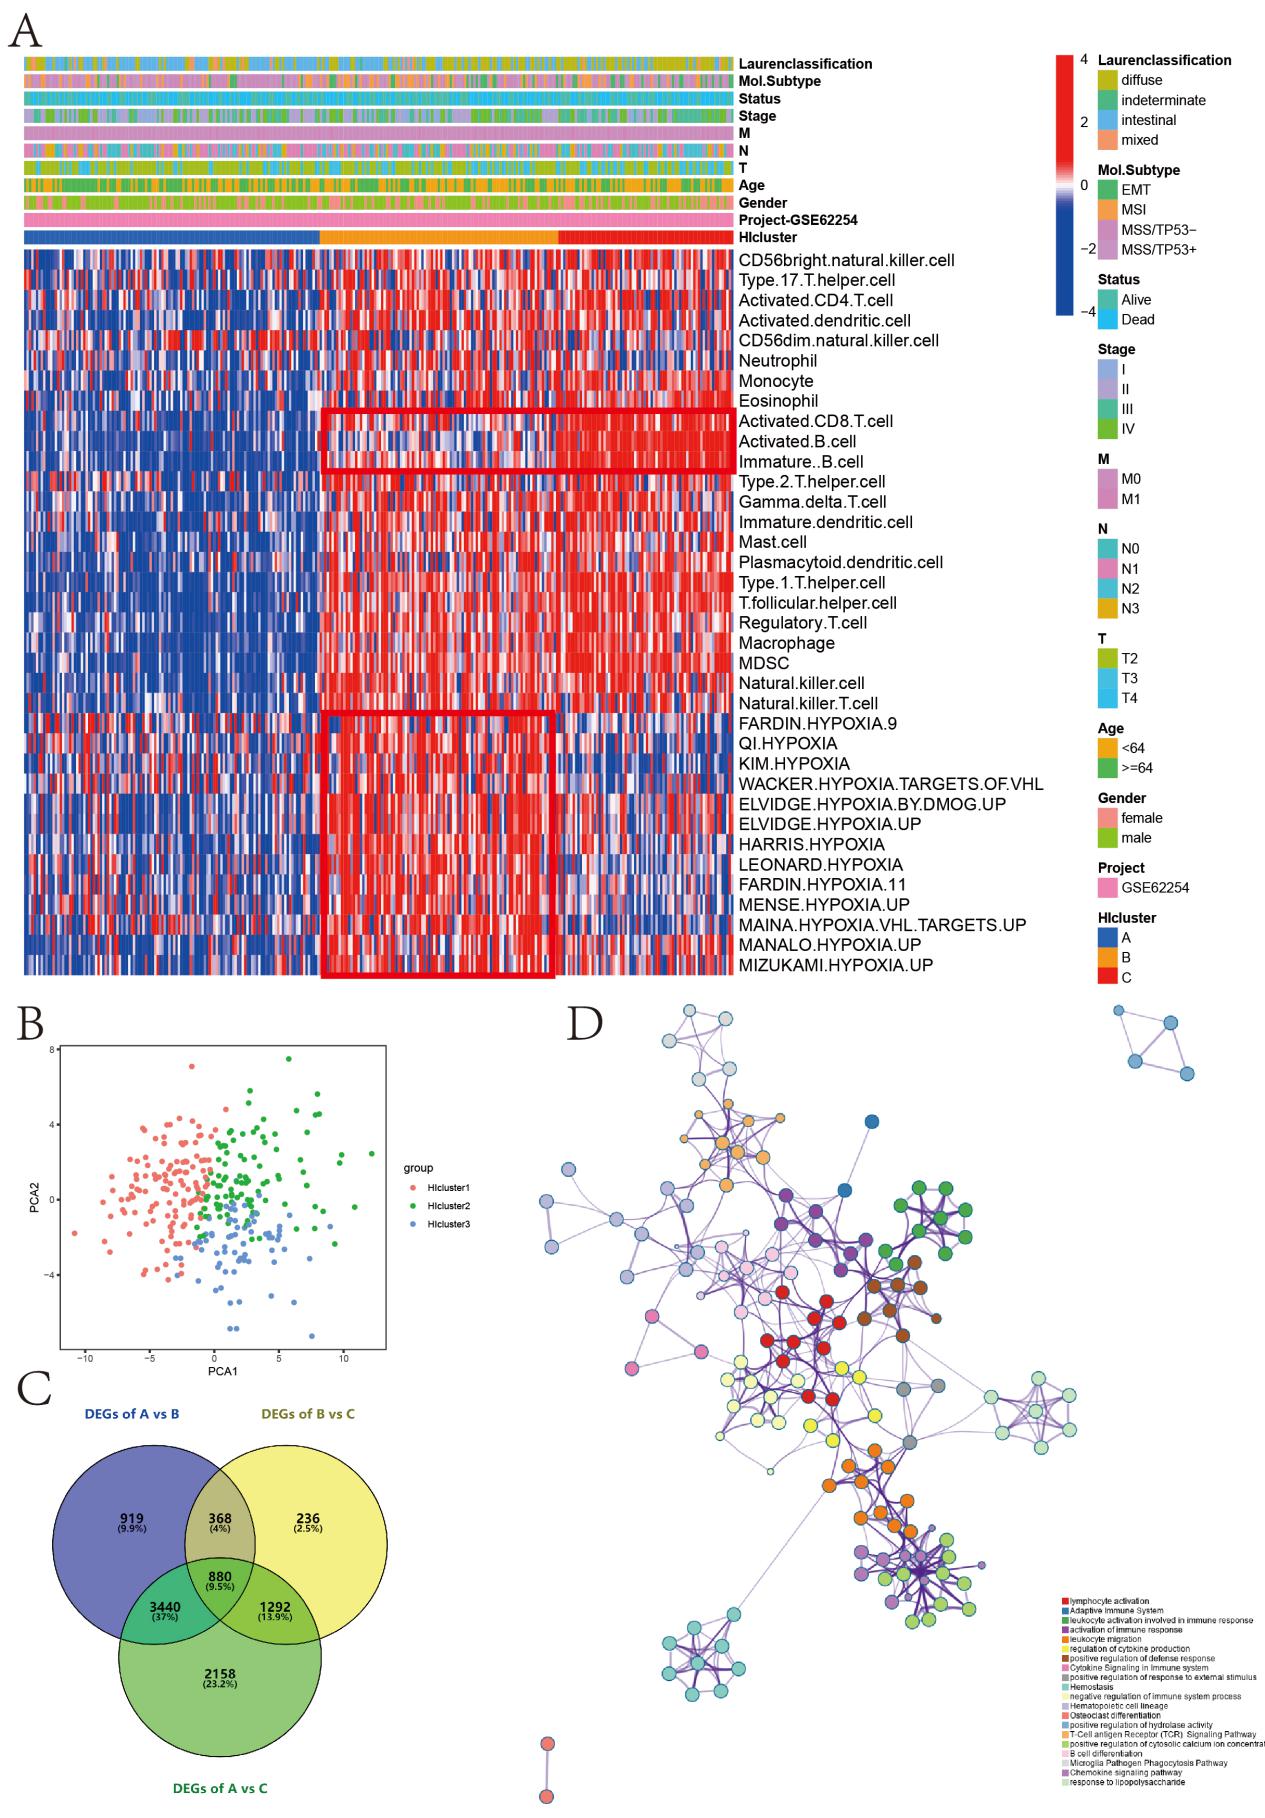


**Figure S2** (A) Unsupervised clustering of 36 gene sets related to hypoxia or Immune cell infiltration in the ACRG cohort. The clinical information collated serves as the patient's annotation. (B) Principal component analysis for three HIclusters. (C) 880 hypoxia-immune-related genes shown in venn diagram. (D) Network of enriched terms [obtain](D:/%E8%BD%AF%E4%BB%B6/%E5%AE%89%E8%A3%85%E4%BD%8D%E7%BD%AE/%E7%BD%91%E6%98%93%E6%9C%89%E9%81%93%E8%AF%8D%E5%85%B8/Dict/8.9.6.0/resultui/html/index.html#/javascript:;)ed from Metascape.

**
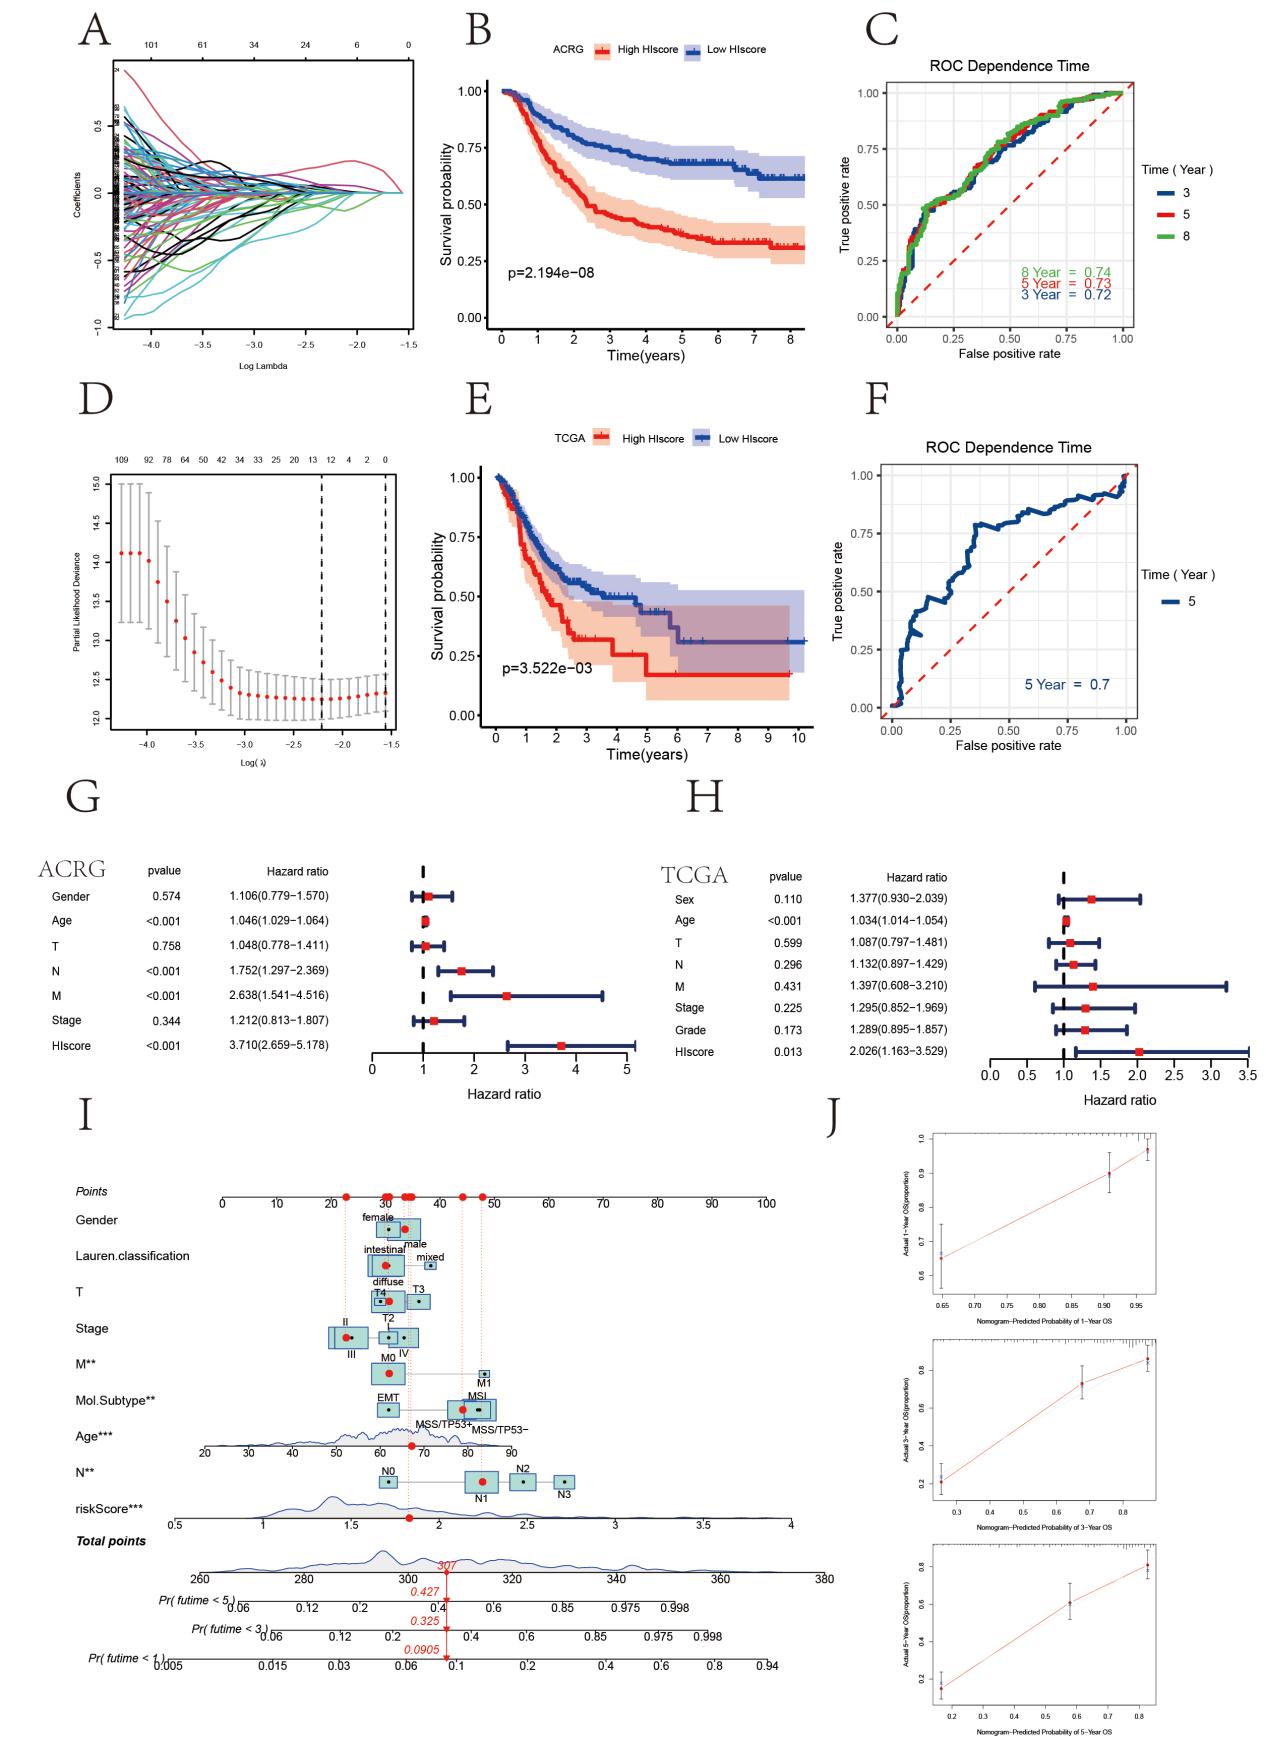
**

**Figure S3** (D)The Lasso regression method based on the glmnet package was used to identify the 13 most prognostic hypoxia-immune-related genes in ACRG cohort. (B)Survival analyses for low (150 cases) and high (150 cases) HIscore patient groups in ACRG cohort using Kaplan-Meier curves ( P < 0.0001, Log-rank test). (C) The predictive value of HIscore in ACRG cohort. (3-year AUC = 0.72, 5-year AUC = 0.73, 8-year AUC = 0.74) (E)Survival analyses for low (267 cases) and high (70 cases) HIscore patient groups in TCGA cohort using Kaplan-Meier curves ( P < 0.01, Log-rank test). (F) The predictive value of HIscore in TCGA cohort ( 5-year AUC = 0.7). Multivariate Cox regression analysis for HIcore in ACRG (G) and TCGA cohort (H) shown by the forest plot. (I) Developed nomogram to predict the probability of survival in [gastric](D:/%E8%BD%AF%E4%BB%B6/%E5%AE%89%E8%A3%85%E4%BD%8D%E7%BD%AE/%E7%BD%91%E6%98%93%E6%9C%89%E9%81%93%E8%AF%8D%E5%85%B8/Dict/8.9.6.0/resultui/html/index.html#/javascript:;) cancer patients. Nomogram built with clinicopathological factors incorporated estimating 1-, 3- ,5- and 8-year overall survival for [gastric](D:/%E8%BD%AF%E4%BB%B6/%E5%AE%89%E8%A3%85%E4%BD%8D%E7%BD%AE/%E7%BD%91%E6%98%93%E6%9C%89%E9%81%93%E8%AF%8D%E5%85%B8/Dict/8.9.6.0/resultui/html/index.html#/javascript:;) cancer patients in the ACRG cohort. (J) The calibration curves describing the consistency between predicted and observed overall survival at different time points in the ACRG cohort. The estimated survival was plotted on the x-axes, and the actual outcomes were plotted on the y-axes. The gray 45-degree dotted line represents an ideal calibration mode.


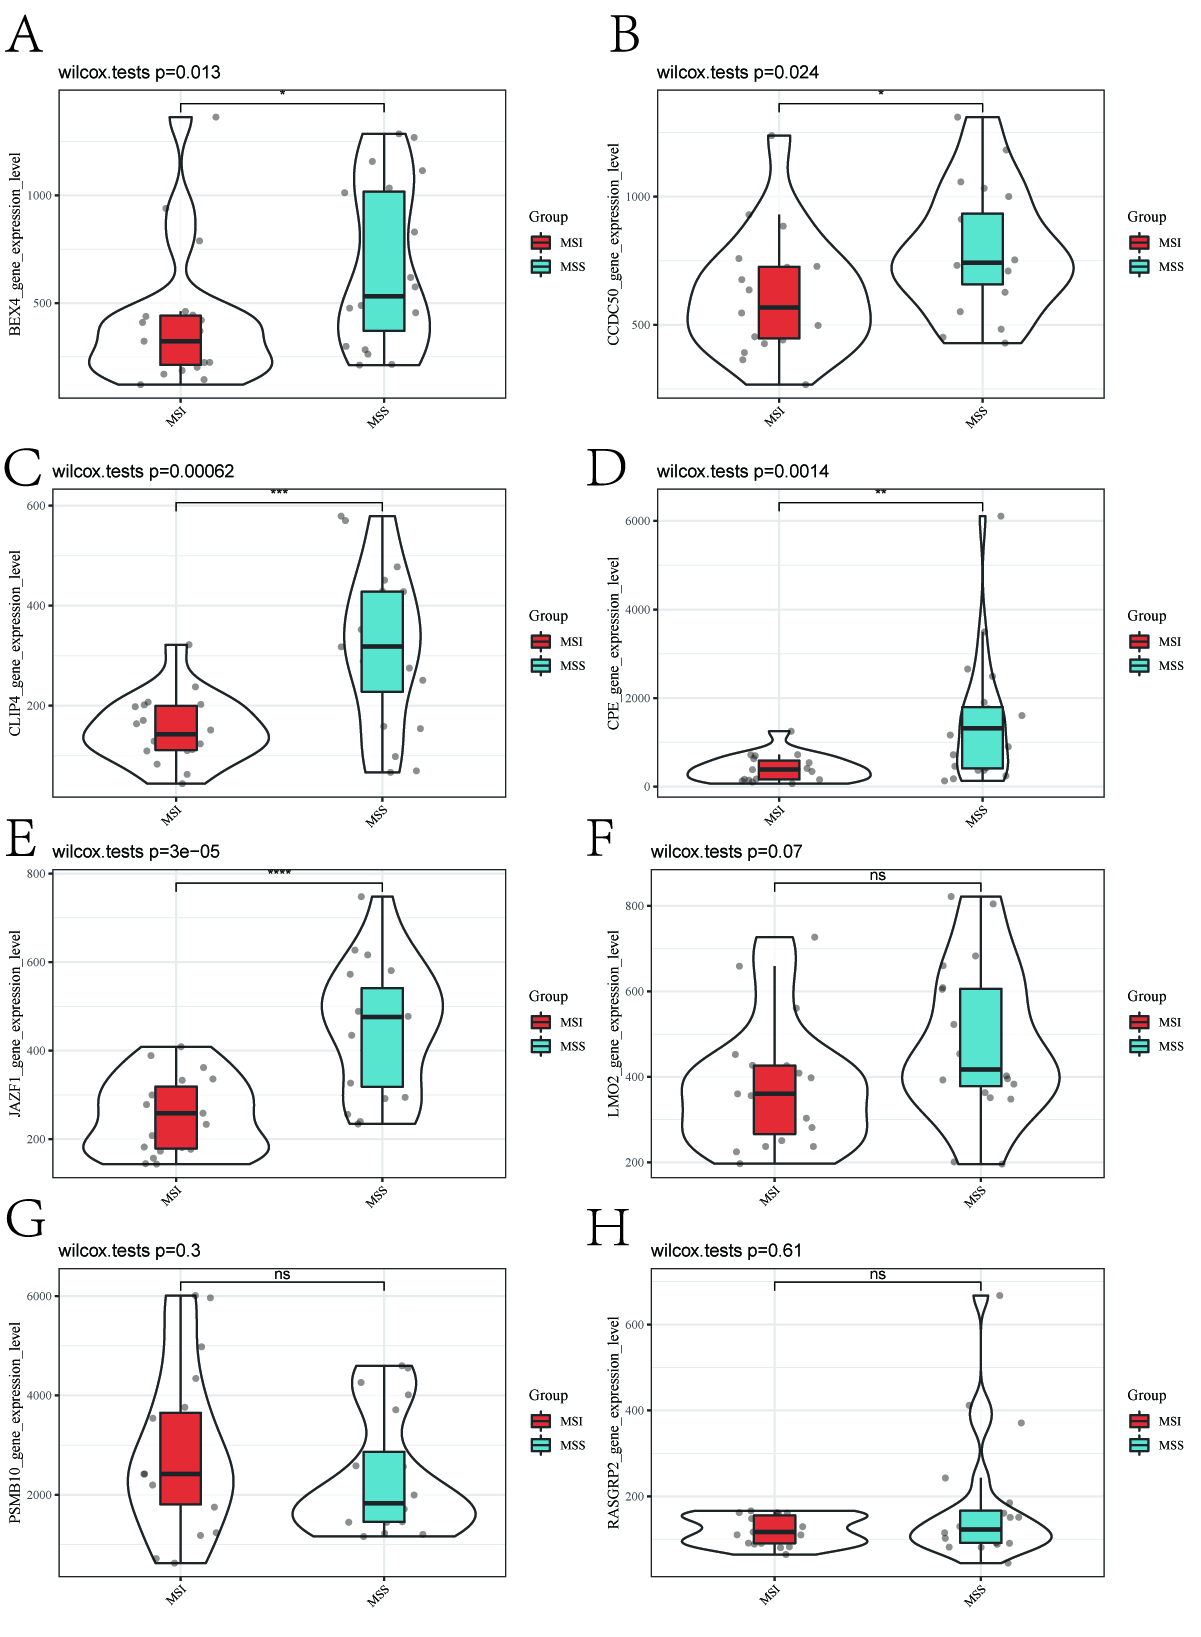


**Figure S4** Difference in the expression of BEX4 (A),CCDC50 (B),CLIP4 (C),CPE (D),JAZF1 (E),LMO2 (F),PSMB10 (G),and RASGRP2 (H) between MSI (red) and MSS (green) subtypes in GSE13911 cohort. (NS：P＞0.05;*P < 0.05; **P < 0.01; ***P < 0.001;****P < 0.0001)

**
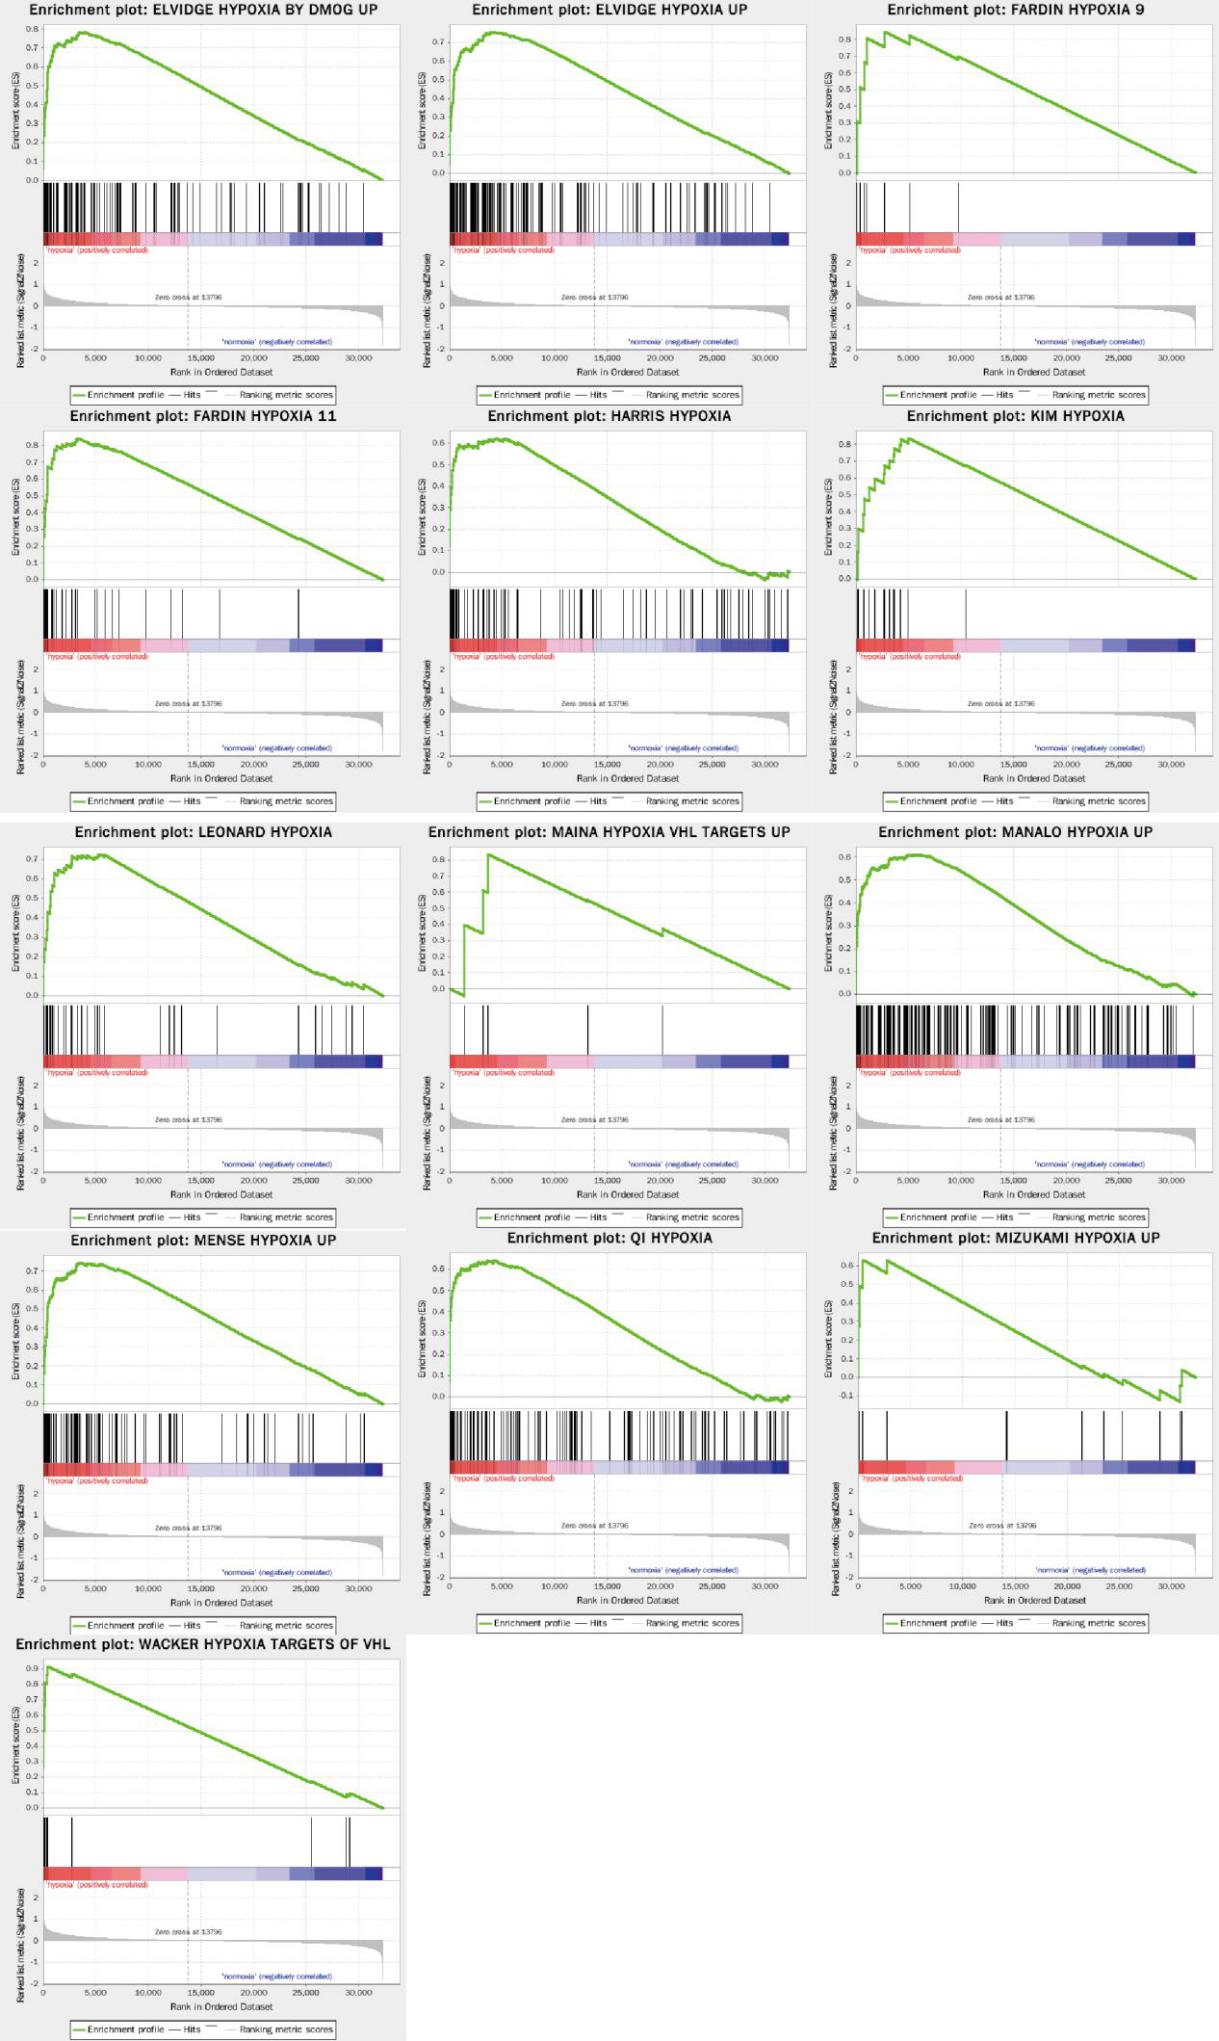
**

**Figure S5** Enrichment plots of 13 hypoxia-related gene sets involved in unsupervised clustering in this study by performing GSEA ,which had significant difference between hypoxia and normoxia cell lines in GSE114083 cohort .

**Supplementary Table 1： Clinical information of all patients.**

| **ID** | **Gender** | **Age** | **T** | **N** | **M** | **Stage** | **Ststus** | **Laurenclassification** |
| --- | --- | --- | --- | --- | --- | --- | --- | --- |
| GSM1523847 | female | ＜64 | T2 | N1 | M0 | II | Alive | indeterminate |
| GSM1524045 | male | ＜64 | T2 | N1 | M0 | II | Alive | indeterminate |
| GSM1523966 | male | ＜64 | T2 | N3 | M0 | IV | Dead | diffuse |
| GSM1523882 | male | ＜64 | T2 | N2 | M0 | III | Alive | diffuse |
| GSM1523957 | female | ＜64 | T2 | N1 | M0 | II | Alive | indeterminate |
| GSM1523781 | female | ＜64 | T2 | N3 | M0 | IV | Dead | indeterminate |
| GSM1524008 | male | ＜64 | T3 | N3 | M0 | IV | Dead | diffuse |
| GSM1523921 | male | ＜64 | T2 | N1 | M0 | II | Alive | diffuse |
| GSM1523946 | male | ＜64 | T2 | N2 | M0 | III | Alive | indeterminate |
| GSM1523765 | female | ＜64 | T3 | N2 | M0 | III | Dead | diffuse |
| GSM1523864 | male | ＜64 | T2 | N0 | M0 | I | Alive | indeterminate |
| GSM1523885 | female | ＜64 | T2 | N0 | M0 | I | Alive | diffuse |
| GSM1523910 | male | ＜64 | T3 | N1 | M0 | III | Alive | diffuse |
| GSM1523880 | female | ＜64 | T2 | N0 | M0 | I | Alive | diffuse |
| GSM1523867 | male | ＜64 | T2 | N2 | M0 | III | Dead | indeterminate |
| GSM1523959 | male | ＜64 | T2 | N3 | M0 | IV | Dead | indeterminate |
| GSM1523792 | male | ＜64 | T2 | N0 | M0 | I | Alive | indeterminate |
| GSM1524031 | male | ＜64 | T2 | N3 | M0 | IV | Alive | indeterminate |
| GSM1524060 | male | ＜64 | T2 | N1 | M0 | II | Alive | indeterminate |
| GSM1523894 | male | ＜64 | T2 | N0 | M0 | I | Dead | indeterminate |
| GSM1523746 | male | ＜64 | T2 | N1 | M0 | II | Dead | mixed |
| GSM1523984 | male | ＜64 | T2 | N1 | M0 | II | Alive | diffuse |
| GSM1523950 | male | ＜64 | T2 | N3 | M0 | IV | Alive | indeterminate |
| GSM1523787 | female | ＜64 | T2 | N3 | M0 | IV | Alive | indeterminate |
| GSM1524070 | male | ＜64 | T2 | N1 | M0 | II | Alive | indeterminate |
| GSM1524001 | male | ＜64 | T2 | N1 | M0 | II | Alive | indeterminate |
| GSM1523923 | male | ＜64 | T2 | N1 | M0 | II | Dead | diffuse |
| GSM1523925 | female | ＜64 | T2 | N1 | M0 | II | Dead | diffuse |
| GSM1523830 | male | ＜64 | T2 | N1 | M0 | II | Dead | indeterminate |
| GSM1523998 | male | ＜64 | T2 | N2 | M0 | III | Dead | indeterminate |
| GSM1523898 | male | ＜64 | T2 | N0 | M0 | I | Alive | indeterminate |
| GSM1523899 | female | ＜64 | T2 | N1 | M0 | II | Alive | indeterminate |
| GSM1524071 | male | ＜64 | T4 | N1 | M0 | III | Alive | indeterminate |
| GSM1524003 | female | ＜64 | T2 | N2 | M0 | III | Alive | indeterminate |
| GSM1523777 | male | ＜64 | T2 | N3 | M0 | IV | Alive | indeterminate |
| GSM1523903 | male | ＜64 | T4 | N0 | M0 | III | Dead | indeterminate |
| GSM1523747 | male | ＜64 | T2 | N2 | M0 | III | Dead | mixed |
| GSM1523983 | male | ＜64 | T2 | N2 | M0 | III | Dead | diffuse |
| GSM1524053 | male | ＜64 | T2 | N1 | M0 | II | Alive | indeterminate |
| GSM1523964 | male | ＜64 | T2 | N1 | M0 | II | Alive | indeterminate |
| GSM1523974 | male | ＜64 | T2 | N1 | M0 | II | Alive | indeterminate |
| GSM1524015 | male | ＜64 | T4 | N1 | M0 | IV | Dead | indeterminate |
| GSM1523954 | male | ＜64 | T2 | N1 | M0 | II | Alive | diffuse |
| GSM1523973 | male | ＜64 | T2 | N2 | M0 | III | Alive | diffuse |
| GSM1523977 | male | ＜64 | T2 | N1 | M0 | II | Dead | diffuse |
| GSM1524013 | male | ＜64 | T2 | N1 | M0 | II | Alive | indeterminate |
| GSM1524011 | female | ＜64 | T2 | N1 | M0 | II | Alive | indeterminate |
| GSM1523879 | male | ＜64 | T3 | N3 | M0 | IV | Alive | indeterminate |
| GSM1523961 | male | ＜64 | T2 | N1 | M0 | II | Dead | indeterminate |
| GSM1524069 | male | ＜64 | T2 | N1 | M0 | II | Dead | indeterminate |
| GSM1523770 | male | ＜64 | T2 | N1 | M0 | II | Dead | indeterminate |
| GSM1523797 | male | ＜64 | T3 | N2 | M0 | III | Dead | indeterminate |
| GSM1523782 | male | ＜64 | T2 | N3 | M0 | IV | Dead | indeterminate |
| GSM1524012 | male | ＞＝64 | T3 | N1 | M0 | III | Alive | diffuse |
| GSM1523824 | male | ＞＝64 | T2 | N1 | M0 | II | Alive | indeterminate |
| GSM1523821 | male | ＞＝64 | T4 | N1 | M0 | IV | Alive | indeterminate |
| GSM1523820 | male | ＞＝64 | T3 | N1 | M0 | III | Dead | indeterminate |
| GSM1524018 | male | ＞＝64 | T3 | N1 | M0 | III | Alive | mixed |
| GSM1523833 | male | ＞＝64 | T3 | N3 | M0 | IV | Dead | diffuse |
| GSM1523901 | female | ＞＝64 | T2 | N0 | M0 | I | Alive | indeterminate |
| GSM1523922 | male | ＞＝64 | T2 | N1 | M0 | II | Dead | indeterminate |
| GSM1523877 | male | ＞＝64 | T2 | N2 | M0 | III | Dead | indeterminate |
| GSM1523818 | female | ＞＝64 | T3 | N3 | M0 | IV | Dead | diffuse |
| GSM1523895 | male | ＞＝64 | T2 | N0 | M0 | I | Alive | indeterminate |
| GSM1523999 | male | ＞＝64 | T2 | N1 | M0 | II | Alive | indeterminate |
| GSM1523816 | male | ＞＝64 | T2 | N1 | M0 | II | Alive | indeterminate |
| GSM1524050 | male | ＞＝64 | T2 | N1 | M0 | II | Dead | indeterminate |
| GSM1523932 | female | ＞＝64 | T2 | N1 | M0 | II | Dead | indeterminate |
| GSM1524014 | female | ＞＝64 | T4 | N3 | M1 | IV | Dead | indeterminate |
| GSM1523978 | female | ＞＝64 | T2 | N3 | M0 | IV | Dead | diffuse |
| GSM1523727 | male | ＞＝64 | T2 | N1 | M0 | II | Alive | indeterminate |
| GSM1523859 | male | ＞＝64 | T2 | N1 | M0 | II | Alive | indeterminate |
| GSM1524017 | male | ＞＝64 | T2 | N2 | M0 | III | Alive | indeterminate |
| GSM1523745 | male | ＞＝64 | T3 | N2 | M0 | III | Alive | diffuse |
| GSM1523831 | male | ＞＝64 | T2 | N1 | M1 | IV | Dead | diffuse |
| GSM1523853 | male | ＞＝64 | T2 | N0 | M0 | I | Alive | indeterminate |
| GSM1523829 | male | ＞＝64 | T2 | N0 | M0 | II | Alive | indeterminate |
| GSM1523814 | male | ＞＝64 | T2 | N1 | M0 | II | Alive | indeterminate |
| GSM1523744 | male | ＞＝64 | T2 | N1 | M0 | II | Alive | diffuse |
| GSM1523926 | male | ＞＝64 | T2 | N1 | M0 | II | Alive | indeterminate |
| GSM1523928 | male | ＞＝64 | T2 | N1 | M0 | II | Dead | indeterminate |
| GSM1523825 | male | ＞＝64 | T3 | N2 | M0 | III | Dead | indeterminate |
| GSM1523940 | male | ＞＝64 | T3 | N3 | M0 | IV | Dead | indeterminate |
| GSM1523976 | male | ＞＝64 | T2 | N2 | M0 | III | Dead | mixed |
| GSM1523953 | male | ＞＝64 | T2 | N2 | M0 | III | Alive | diffuse |
| GSM1523992 | female | ＞＝64 | T3 | N3 | M0 | IV | Dead | diffuse |
| GSM1523795 | male | ＞＝64 | T2 | N0 | M0 | I | Alive | indeterminate |
| GSM1523865 | male | ＞＝64 | T2 | N1 | M0 | II | Alive | indeterminate |
| GSM1523960 | female | ＞＝64 | T2 | N1 | M0 | II | Alive | indeterminate |
| GSM1523802 | female | ＞＝64 | T2 | N1 | M0 | II | Alive | indeterminate |
| GSM1523871 | female | ＞＝64 | T2 | N1 | M0 | II | Alive | indeterminate |
| GSM1523942 | male | ＞＝64 | T2 | N2 | M0 | III | Alive | indeterminate |
| GSM1524036 | male | ＞＝64 | T3 | N1 | M0 | III | Alive | indeterminate |
| GSM1523837 | male | ＞＝64 | T2 | N0 | M0 | I | Dead | indeterminate |
| GSM1524032 | female | ＞＝64 | T4 | N1 | M0 | IV | Dead | indeterminate |
| GSM1523934 | male | ＞＝64 | T3 | N3 | M0 | IV | Dead | indeterminate |
| GSM1523972 | male | ＞＝64 | T2 | N1 | M1 | IV | Dead | mixed |
| GSM1524068 | female | ＞＝64 | T2 | N1 | M0 | II | Alive | indeterminate |
| GSM1524056 | male | ＞＝64 | T2 | N1 | M0 | II | Dead | indeterminate |
| GSM1524005 | male | ＞＝64 | T2 | N3 | M1 | IV | Dead | indeterminate |
| GSM1523997 | female | ＞＝64 | T4 | N3 | M0 | IV | Dead | diffuse |
| GSM1523943 | female | ＞＝64 | T3 | N2 | M1 | IV | Dead | diffuse |
| GSM1523803 | female | ＞＝64 | T3 | N3 | M0 | IV | Dead | indetermiNAte |
| GSM1524054 | male | ＞＝64 | T2 | N1 | M0 | II | Alive | indeterminate |
| GSM1524028 | male | ＞＝64 | T2 | N2 | M0 | III | Dead | indeterminate |
| GSM1523911 | female | ＞＝64 | T3 | N3 | M0 | IV | Dead | indeterminate |
| GSM1523817 | male | ＞＝64 | T3 | N3 | M0 | IV | Dead | diffuse |
| GSM1523800 | male | ＞＝64 | T2 | N2 | M0 | III | Alive | indeterminate |
| GSM1523933 | male | ＞＝64 | T2 | N1 | M0 | II | Alive | diffuse |
| GSM1523801 | male | ＞＝64 | T2 | N1 | M0 | II | Alive | indetermiNAte |
| GSM1523889 | male | ＞＝64 | T2 | N0 | M0 | I | Alive | indeterminate |
| GSM1523947 | female | ＞＝64 | T3 | N0 | M0 | II | Alive | indeterminate |
| GSM1523893 | male | ＞＝64 | T2 | N0 | M0 | I | Dead | indeterminate |
| GSM1523881 | male | ＞＝64 | T2 | N2 | M0 | III | Dead | indeterminate |
| GSM1523870 | male | ＞＝64 | T2 | N1 | M0 | II | Alive | indeterminate |
| GSM1523876 | male | ＞＝64 | T2 | N0 | M0 | I | Alive | indeterminate |
| GSM1523956 | male | ＞＝64 | T2 | N1 | M0 | II | Dead | mixed |
| GSM1523883 | male | ＞＝64 | T2 | N1 | M0 | II | Dead | diffuse |
| GSM1523775 | female | ＞＝64 | T2 | N1 | M0 | II | Alive | diffuse |
| GSM1523851 | female | ＞＝64 | T2 | N0 | M0 | I | Alive | indeterminate |
| GSM1524061 | male | ＞＝64 | T2 | N1 | M0 | II | Alive | indeterminate |
| GSM1523809 | male | ＞＝64 | T2 | N1 | M0 | II | Alive | indeterminate |
| GSM1524023 | female | ＞＝64 | T4 | N2 | M0 | IV | Alive | indeterminate |
| GSM1523855 | male | ＞＝64 | T2 | N2 | M0 | III | Dead | indeterminate |
| GSM1523819 | female | ＞＝64 | T4 | N1 | M0 | IV | Dead | indeterminate |
| GSM1523970 | female | ＞＝64 | T2 | N1 | M0 | II | Dead | mixed |
| GSM1523840 | male | ＞＝64 | T2 | N1 | M0 | II | Dead | diffuse |
| GSM1523897 | female | ＞＝64 | T2 | N0 | M0 | I | Alive | indeterminate |
| GSM1523979 | male | ＞＝64 | T3 | N2 | M0 | III | Dead | indeterminate |
| GSM1523875 | male | ＞＝64 | T2 | N1 | M0 | II | Dead | indeterminate |
| GSM1523799 | male | ＞＝64 | T2 | N1 | M0 | II | Alive | indeterminate |
| GSM1523995 | male | ＞＝64 | T2 | N2 | M0 | III | Dead | mixed |
| GSM1524016 | male | ＜64 | T3 | N3 | M1 | IV | Dead | diffuse |
| GSM1523987 | female | ＜64 | T3 | N2 | M0 | III | Dead | diffuse |
| GSM1523890 | female | ＜64 | T3 | N2 | M0 | III | Alive | diffuse |
| GSM1523804 | female | ＜64 | T3 | N1 | M0 | III | Alive | diffuse |
| GSM1523990 | male | ＜64 | T2 | N2 | M0 | III | Dead | diffuse |
| GSM1523729 | female | ＜64 | T2 | N1 | M0 | II | Alive | diffuse |
| GSM1524072 | female | ＜64 | T3 | N2 | M1 | IV | Dead | diffuse |
| GSM1523784 | female | ＜64 | T2 | N2 | M0 | III | Alive | diffuse |
| GSM1523908 | female | ＜64 | T4 | N3 | M0 | IV | Alive | diffuse |
| GSM1523786 | female | ＜64 | T2 | N3 | M1 | IV | Dead | diffuse |
| GSM1523920 | male | ＜64 | T3 | N0 | M0 | II | Dead | indeterminate |
| GSM1523887 | male | ＜64 | T2 | N0 | M0 | I | Alive | diffuse |
| GSM1523927 | male | ＜64 | T2 | N1 | M0 | II | Alive | diffuse |
| GSM1523776 | male | ＜64 | T2 | N1 | M0 | II | Alive | diffuse |
| GSM1524007 | female | ＜64 | T3 | N1 | M1 | IV | Dead | diffuse |
| GSM1523884 | male | ＜64 | T3 | N1 | M0 | III | Alive | diffuse |
| GSM1524051 | female | ＜64 | T2 | N1 | M0 | II | Alive | diffuse |
| GSM1523856 | female | ＜64 | T2 | N1 | M0 | II | Alive | diffuse |
| GSM1523930 | male | ＜64 | T2 | N1 | M0 | II | Alive | indeterminate |
| GSM1524020 | male | ＜64 | T2 | N2 | M0 | III | Alive | indeterminate |
| GSM1523896 | male | ＜64 | T2 | N1 | M0 | II | Dead | indeterminate |
| GSM1523924 | male | ＜64 | T2 | N1 | M0 | II | Alive | diffuse |
| GSM1523967 | male | ＜64 | T2 | N2 | M0 | III | Alive | diffuse |
| GSM1523965 | male | ＜64 | T3 | N3 | M0 | IV | Dead | diffuse |
| GSM1523888 | male | ＜64 | T2 | N0 | M0 | I | Alive | indeterminate |
| GSM1523768 | male | ＜64 | T2 | N2 | M0 | III | Dead | indeterminate |
| GSM1523906 | male | ＜64 | T2 | N0 | M0 | I | Alive | diffuse |
| GSM1523891 | female | ＜64 | T2 | N0 | M0 | I | Alive | indeterminate |
| GSM1523952 | female | ＜64 | T2 | N1 | M0 | II | Alive | diffuse |
| GSM1523835 | male | ＜64 | T2 | N1 | M0 | II | Alive | indeterminate |
| GSM1523844 | male | ＜64 | T3 | N2 | M0 | III | Alive | indeterminate |
| GSM1524055 | male | ＜64 | T2 | N1 | M0 | II | Dead | indeterminate |
| GSM1523783 | female | ＜64 | T2 | N2 | M0 | III | Alive | diffuse |
| GSM1524040 | female | ＜64 | T3 | N3 | M0 | IV | Dead | diffuse |
| GSM1523852 | male | ＜64 | T3 | N1 | M0 | III | Dead | indeterminate |
| GSM1523958 | male | ＜64 | T2 | N1 | M0 | II | Alive | diffuse |
| GSM1523808 | male | ＜64 | T3 | N1 | M0 | III | Alive | diffuse |
| GSM1523778 | female | ＜64 | T3 | N2 | M0 | III | Alive | diffuse |
| GSM1524021 | female | ＜64 | T3 | N1 | M0 | III | Dead | diffuse |
| GSM1523878 | male | ＜64 | T2 | N1 | M0 | II | Alive | indeterminate |
| GSM1523836 | male | ＜64 | T3 | N1 | M0 | III | Alive | indeterminate |
| GSM1523904 | male | ＜64 | T2 | N3 | M0 | IV | Alive | indeterminate |
| GSM1524041 | male | ＜64 | T2 | N3 | M1 | IV | Alive | indeterminate |
| GSM1523839 | male | ＜64 | T3 | N2 | M0 | III | Alive | diffuse |
| GSM1523873 | male | ＜64 | T2 | N2 | M1 | IV | Dead | diffuse |
| GSM1524004 | male | ＜64 | T4 | N3 | M1 | IV | Dead | diffuse |
| GSM1523892 | male | ＜64 | T2 | N0 | M0 | I | Alive | indeterminate |
| GSM1524043 | male | ＜64 | T2 | N2 | M1 | IV | Dead | diffuse |
| GSM1523791 | male | ＜64 | T2 | N0 | M0 | I | Alive | indeterminate |
| GSM1523785 | female | ＜64 | T2 | N1 | M0 | II | Dead | indeterminate |
| GSM1523931 | female | ＜64 | T2 | N1 | M0 | II | Alive | diffuse |
| GSM1524027 | male | ＜64 | T3 | N2 | M0 | III | Dead | diffuse |
| GSM1524024 | male | ＜64 | T3 | N2 | M0 | III | Dead | diffuse |
| GSM1523872 | female | ＜64 | T4 | N3 | M1 | IV | Dead | diffuse |
| GSM1523812 | male | ＜64 | T3 | N1 | M0 | III | Alive | diffuse |
| GSM1524042 | female | ＜64 | T2 | N2 | M0 | III | Dead | diffuse |
| GSM1524049 | male | ＜64 | T2 | N1 | M0 | II | Alive | indeterminate |
| GSM1523790 | male | ＜64 | T2 | N1 | M0 | II | Alive | indeterminate |
| GSM1523832 | male | ＜64 | T2 | N2 | M0 | III | Dead | indeterminate |
| GSM1523868 | male | ＜64 | T3 | N2 | M0 | III | Alive | mixed |
| GSM1523846 | male | ＜64 | T2 | N2 | M0 | III | Alive | diffuse |
| GSM1523991 | female | ＜64 | T2 | N1 | M0 | II | Alive | indeterminate |
| GSM1523994 | male | ＜64 | T2 | N2 | M0 | III | Alive | indeterminate |
| GSM1523861 | male | ＞＝64 | T2 | N0 | M0 | I | Alive | indeterminate |
| GSM1523823 | female | ＞＝64 | T2 | N2 | M0 | III | Alive | indeterminate |
| GSM1523919 | male | ＞＝64 | T4 | N1 | M0 | IV | Alive | indeterminate |
| GSM1523863 | female | ＞＝64 | T2 | N0 | M0 | I | Alive | mixed |
| GSM1524002 | male | ＞＝64 | T3 | N2 | M0 | III | Alive | mixed |
| GSM1523815 | male | ＞＝64 | T2 | N2 | M0 | III | Dead | mixed |
| GSM1523843 | female | ＞＝64 | T4 | N2 | M1 | IV | Dead | diffuse |
| GSM1524034 | male | ＞＝64 | T3 | N1 | M0 | III | Dead | indeterminate |
| GSM1523838 | male | ＞＝64 | T3 | N2 | M0 | III | Dead | indeterminate |
| GSM1523841 | male | ＞＝64 | T2 | N1 | M0 | II | Dead | mixed |
| GSM1523905 | male | ＞＝64 | T2 | N1 | M0 | II | Alive | diffuse |
| GSM1523951 | male | ＞＝64 | T4 | N2 | M1 | IV | Dead | diffuse |
| GSM1523810 | male | ＞＝64 | T2 | N0 | M0 | I | Alive | indeterminate |
| GSM1523822 | male | ＞＝64 | T2 | N0 | M0 | I | Alive | indeterminate |
| GSM1523860 | male | ＞＝64 | T2 | N0 | M0 | I | Dead | mixed |
| GSM1523869 | female | ＞＝64 | T2 | N1 | M0 | II | Alive | diffuse |
| GSM1523794 | male | ＞＝64 | T2 | N3 | M0 | IV | Dead | diffuse |
| GSM1523929 | female | ＞＝64 | T2 | N2 | M0 | III | Alive | indeterminate |
| GSM1524033 | female | ＞＝64 | T2 | N2 | M1 | IV | Alive | indeterminate |
| GSM1524048 | male | ＞＝64 | T2 | N1 | M0 | II | Dead | indeterminate |
| GSM1523748 | female | ＞＝64 | T3 | N1 | M0 | III | Alive | diffuse |
| GSM1523728 | female | ＞＝64 | T2 | N1 | M0 | II | Alive | indeterminate |
| GSM1523806 | male | ＞＝64 | T3 | N2 | M0 | III | Dead | indeterminate |
| GSM1523854 | male | ＞＝64 | T2 | N1 | M0 | II | Alive | diffuse |
| GSM1524000 | female | ＞＝64 | T3 | N2 | M0 | III | Alive | diffuse |
| GSM1523789 | male | ＞＝64 | T2 | N3 | M1 | IV | Dead | diffuse |
| GSM1523963 | female | ＞＝64 | T2 | N1 | M0 | II | Dead | indeterminate |
| GSM1523993 | male | ＞＝64 | T2 | N2 | M0 | III | Dead | indeterminate |
| GSM1523813 | male | ＞＝64 | T3 | N1 | M0 | III | Alive | diffuse |
| GSM1523842 | male | ＞＝64 | T2 | N1 | M0 | II | Dead | diffuse |
| GSM1523941 | male | ＞＝64 | T2 | N3 | M0 | IV | Dead | diffuse |
| GSM1524019 | male | ＞＝64 | T3 | N3 | M0 | IV | Dead | diffuse |
| GSM1523807 | female | ＞＝64 | T2 | N1 | M0 | II | Alive | indeterminate |
| GSM1523985 | male | ＞＝64 | T2 | N2 | M0 | III | Dead | indeterminate |
| GSM1523944 | male | ＞＝64 | T2 | N2 | M0 | III | Alive | diffuse |
| GSM1524025 | male | ＞＝64 | T2 | N2 | M0 | III | Dead | diffuse |
| GSM1523769 | female | ＞＝64 | T3 | N3 | M0 | IV | Dead | diffuse |
| GSM1523874 | female | ＞＝64 | T2 | N0 | M0 | I | Alive | indeterminate |
| GSM1524037 | male | ＞＝64 | T3 | N2 | M0 | III | Dead | indeterminate |
| GSM1523828 | male | ＞＝64 | T3 | N3 | M0 | IV | Dead | indeterminate |
| GSM1523805 | female | ＞＝64 | T3 | N2 | M0 | III | Dead | mixed |
| GSM1524047 | male | ＞＝64 | T2 | N1 | M0 | II | Alive | diffuse |
| GSM1523909 | male | ＞＝64 | T2 | N1 | M0 | II | Alive | diffuse |
| GSM1524038 | male | ＞＝64 | T2 | N3 | M1 | IV | Dead | diffuse |
| GSM1523826 | male | ＞＝64 | T3 | N1 | M0 | III | Dead | indeterminate |
| GSM1523996 | female | ＞＝64 | T2 | N1 | M0 | II | Dead | diffuse |
| GSM1523779 | female | ＞＝64 | T3 | N2 | M0 | III | Alive | diffuse |
| GSM1523845 | female | ＞＝64 | T3 | N3 | M0 | IV | Dead | diffuse |
| GSM1523811 | female | ＞＝64 | T2 | N0 | M0 | I | Alive | indeterminate |
| GSM1524044 | male | ＞＝64 | T2 | N1 | M1 | IV | Dead | indeterminate |
| GSM1523937 | male | ＞＝64 | T2 | N1 | M0 | II | Dead | indeterminate |
| GSM1523793 | female | ＞＝64 | T2 | N1 | M0 | II | Alive | diffuse |
| GSM1523780 | female | ＞＝64 | T4 | N1 | M0 | IV | Dead | indeterminate |
| GSM1523939 | female | ＜64 | T3 | N3 | M0 | IV | Dead | diffuse |
| GSM1523827 | female | ＜64 | T3 | N1 | M0 | III | Alive | diffuse |
| GSM1523850 | male | ＜64 | T4 | N2 | M0 | IV | Dead | diffuse |
| GSM1524062 | female | ＜64 | T3 | N1 | M0 | III | Dead | diffuse |
| GSM1524006 | female | ＜64 | T2 | N2 | M0 | III | Dead | diffuse |
| GSM1523862 | male | ＜64 | T3 | N3 | M0 | IV | Dead | diffuse |
| GSM1523858 | female | ＜64 | T2 | N0 | M0 | I | Dead | diffuse |
| GSM1523788 | female | ＜64 | T2 | N3 | M1 | IV | Dead | diffuse |
| GSM1523968 | female | ＜64 | T3 | N0 | M1 | IV | Dead | diffuse |
| GSM1523971 | female | ＜64 | T3 | N1 | M0 | III | Dead | diffuse |
| GSM1524030 | female | ＜64 | T3 | N1 | M0 | III | Dead | diffuse |
| GSM1523989 | male | ＜64 | T3 | N3 | M0 | IV | Alive | indeterminate |
| GSM1523962 | male | ＜64 | T3 | N2 | M0 | III | Dead | diffuse |
| GSM1523886 | male | ＜64 | T3 | N3 | M0 | IV | Dead | diffuse |
| GSM1523955 | male | ＜64 | T2 | N2 | M0 | III | Dead | mixed |
| GSM1524029 | female | ＜64 | T4 | N3 | M0 | IV | Dead | diffuse |
| GSM1523981 | male | ＜64 | T2 | N1 | M0 | II | Alive | diffuse |
| GSM1523949 | female | ＜64 | T3 | N2 | M1 | IV | Dead | diffuse |
| GSM1524026 | female | ＜64 | T3 | N1 | M0 | III | Alive | diffuse |
| GSM1523948 | male | ＜64 | T3 | N3 | M0 | IV | Dead | diffuse |
| GSM1523945 | male | ＜64 | T4 | N3 | M0 | IV | Dead | diffuse |
| GSM1523938 | female | ＜64 | T3 | N3 | M0 | IV | Dead | diffuse |
| GSM1523796 | male | ＜64 | T3 | N1 | M0 | III | Dead | indeterminate |
| GSM1523982 | male | ＜64 | T3 | N2 | M1 | IV | Dead | diffuse |
| GSM1524058 | female | ＜64 | T2 | N1 | M0 | II | Alive | indeterminate |
| GSM1523774 | male | ＜64 | T2 | N2 | M0 | III | Alive | indeterminate |
| GSM1524059 | male | ＜64 | T3 | N0 | M0 | II | Alive | diffuse |
| GSM1523772 | female | ＜64 | T3 | N1 | M1 | IV | Dead | diffuse |
| GSM1524046 | female | ＜64 | T2 | N1 | M0 | II | Alive | diffuse |
| GSM1524009 | female | ＜64 | T2 | N2 | M0 | III | Dead | diffuse |
| GSM1523918 | male | ＜64 | T3 | N2 | M0 | III | Dead | diffuse |
| GSM1523771 | female | ＜64 | T4 | N2 | M1 | IV | Dead | diffuse |
| GSM1523935 | male | ＞＝64 | T3 | N0 | M0 | II | Alive | diffuse |
| GSM1524035 | female | ＞＝64 | T3 | N3 | M0 | IV | Alive | mixed |
| GSM1523988 | male | ＞＝64 | T2 | N2 | M0 | III | Dead | diffuse |
| GSM1524022 | female | ＞＝64 | T3 | N3 | M0 | IV | Dead | diffuse |
| GSM1523849 | male | ＞＝64 | T3 | N1 | M0 | III | Dead | indeterminate |
| GSM1523834 | female | ＞＝64 | T3 | N1 | M0 | III | Dead | diffuse |
| GSM1523975 | male | ＞＝64 | T3 | N1 | M0 | III | Dead | diffuse |
| GSM1523848 | male | ＞＝64 | T3 | N1 | M0 | III | Alive | diffuse |
| GSM1523969 | male | ＞＝64 | T3 | N1 | M0 | III | Dead | diffuse |
| GSM1523936 | male | ＞＝64 | T2 | N1 | M0 | II | Dead | diffuse |
| GSM1523986 | male | ＞＝64 | T3 | N2 | M0 | III | Alive | diffuse |
| GSM1524039 | male | ＞＝64 | T3 | N2 | M0 | III | Dead | diffuse |
| GSM1524010 | female | ＞＝64 | T2 | N2 | M0 | III | Dead | diffuse |
| GSM1524052 | male | ＞＝64 | T2 | N1 | M0 | II | Dead | diffuse |
| GSM1523773 | female | ＞＝64 | T3 | N3 | M0 | IV | Dead | diffuse |
| GSM1523857 | female | ＞＝64 | T3 | N2 | M0 | III | Dead | indeterminate |
| GSM1523980 | female | ＞＝64 | T3 | N2 | M0 | III | Dead | diffuse |
| GSM1524057 | male | ＞＝64 | T4 | N0 | M0 | IV | Dead | indeterminate |
| GSM1523798 | male | ＞＝64 | T2 | N1 | M0 | II | Dead | diffuse |
| GSM1523866 | female | ＞＝64 | T3 | N2 | M1 | IV | Dead | indeterminate |
| GSM387935 | male | ＜64 | NA | NA | NA | IV | Dead | indeterminate |
| GSM387956 | female | ＜64 | NA | NA | NA | III | Alive | diffuse |
| GSM2235993 | male | ＜64 | T3 | N1 | NA | NA | Alive | NA |
| GSM2235614 | male | ＜64 | T4 | N2 | NA | NA | Alive | NA |
| GSM387814 | female | ＜64 | NA | NA | NA | IV | Dead | diffuse |
| GSM387795 | male | ＜64 | NA | NA | NA | III | Alive | diffuse |
| GSM2235773 | male | ＜64 | T4 | N2 | NA | NA | Dead | NA |
| GSM387972 | male | ＜64 | NA | NA | NA | IV | Alive | indeterminate |
| GSM387832 | female | ＜64 | NA | NA | NA | III | Alive | diffuse |
| GSM2235908 | female | ＜64 | T3 | N0 | NA | NA | Alive | NA |
| GSM2235636 | female | ＜64 | T4 | N2 | NA | NA | Alive | NA |
| GSM2235577 | female | ＜64 | T4 | N0 | NA | NA | Dead | NA |
| GSM2235823 | female | ＜64 | T4 | N1 | NA | NA | Dead | NA |
| GSM2236021 | male | ＜64 | T4 | N3 | NA | NA | Dead | NA |
| GSM2235561 | female | ＜64 | T4 | N2 | NA | NA | Alive | NA |
| GSM2236012 | male | ＜64 | T4 | N3 | NA | NA | Dead | NA |
| GSM387925 | female | ＜64 | NA | NA | NA | II | Dead | diffuse |
| GSM2235931 | male | ＜64 | T4 | N1 | NA | NA | Alive | NA |
| GSM2235902 | male | ＜64 | T4 | N1 | NA | NA | Dead | NA |
| GSM2236051 | male | ＜64 | T4 | N2 | NA | NA | Dead | NA |
| GSM2235698 | male | ＜64 | T3 | N3 | NA | NA | Dead | NA |
| GSM387979 | female | ＜64 | NA | NA | NA | IV | Dead | diffuse |
| GSM2235703 | male | ＜64 | T4 | N2 | NA | NA | Dead | NA |
| GSM2236086 | female | ＜64 | T4 | N0 | NA | NA | Alive | NA |
| GSM2235948 | male | ＜64 | T4 | N1 | NA | NA | Alive | NA |
| GSM2235941 | female | ＜64 | T2 | N1 | NA | NA | Alive | NA |
| GSM2236018 | male | ＜64 | T4 | N2 | NA | NA | Alive | NA |
| GSM2235791 | female | ＜64 | T4 | N1 | NA | NA | Dead | NA |
| GSM2235888 | female | ＜64 | T4 | N1 | NA | NA | Dead | NA |
| GSM1379317 | NA | ＜64 | T3 | N1 | M0 | III | Alive | NA |
| GSM2235754 | female | ＜64 | T4 | N1 | NA | NA | Alive | NA |
| GSM1379290 | NA | ＜64 | T3 | N1 | M0 | III | Alive | NA |
| GSM2235606 | male | ＜64 | T4 | N2 | NA | NA | Alive | NA |
| GSM2235744 | female | ＜64 | T4 | N1 | NA | NA | Dead | NA |
| GSM387912 | female | ＜64 | NA | NA | NA | III | Alive | diffuse |
| GSM387858 | female | ＜64 | NA | NA | NA | IV | Dead | diffuse |
| GSM387934 | female | ＜64 | NA | NA | NA | III | Alive | diffuse |
| GSM2235954 | female | ＜64 | T3 | N1 | NA | NA | Alive | NA |
| GSM387791 | male | ＜64 | NA | NA | NA | IV | Alive | indeterminate |
| GSM1379322 | NA | ＜64 | T3 | N0 | M0 | II | Alive | NA |
| GSM2235751 | male | ＜64 | T3 | N1 | NA | NA | Alive | NA |
| GSM2235966 | male | ＜64 | T4 | N3 | NA | NA | Alive | NA |
| GSM2235728 | female | ＜64 | T4 | N1 | NA | NA | Dead | NA |
| GSM387953 | male | ＜64 | NA | NA | NA | IV | Alive | indeterminate |
| GSM387970 | female | ＜64 | NA | NA | NA | III | Dead | indeterminate |
| GSM2235721 | male | ＜64 | T2 | N1 | NA | NA | Alive | NA |
| GSM2236053 | female | ＜64 | T4 | N2 | NA | NA | Dead | NA |
| GSM2235939 | female | ＜64 | T2 | N0 | NA | NA | Alive | NA |
| GSM2235752 | male | ＜64 | T4 | N1 | NA | NA | Alive | NA |
| GSM2235994 | female | ＜64 | T3 | N1 | NA | NA | Alive | NA |
| GSM2235695 | female | ＜64 | T4 | N1 | NA | NA | Alive | NA |
| GSM2236006 | male | ＜64 | T4 | N1 | NA | NA | Dead | NA |
| GSM2235758 | male | ＜64 | T4 | N2 | NA | NA | Dead | NA |
| GSM858130 | male | ＜64 | NA | NA | NA | IV | Dead | diffuse |
| GSM2235628 | male | ＜64 | T3 | N1 | NA | NA | Alive | NA |
| GSM2235949 | male | ＜64 | T4 | N1 | NA | NA | Alive | NA |
| GSM2235717 | female | ＜64 | T4 | N3 | NA | NA | Dead | NA |
| GSM387911 | male | ＜64 | NA | NA | NA | IV | Dead | mixed |
| GSM1379278 | NA | ＜64 | T3 | N1 | M0 | III | Alive | NA |
| GSM2235884 | male | ＜64 | T4 | N0 | NA | NA | Alive | NA |
| GSM2236032 | male | ＜64 | T4 | N0 | NA | NA | Alive | NA |
| GSM2236029 | male | ＜64 | T2 | N1 | NA | NA | Alive | NA |
| GSM2236068 | male | ＜64 | T4 | N0 | NA | NA | Dead | NA |
| GSM2235865 | male | ＜64 | T4 | N1 | NA | NA | Dead | NA |
| GSM2236075 | male | ＜64 | T4 | N1 | NA | NA | Dead | NA |
| GSM2236049 | female | ＜64 | T4 | N1 | NA | NA | Dead | NA |
| GSM2235566 | male | ＜64 | T4 | N2 | NA | NA | Dead | NA |
| GSM2235757 | male | ＜64 | T4 | N2 | NA | NA | Dead | NA |
| GSM387854 | male | ＜64 | NA | NA | NA | II | Alive | indeterminate |
| GSM1379269 | NA | ＜64 | T3 | N2 | M0 | III | Alive | NA |
| GSM2235950 | male | ＜64 | T4 | N1 | NA | NA | Alive | NA |
| GSM2235734 | female | ＜64 | T4 | N1 | NA | NA | Alive | NA |
| GSM2235971 | male | ＜64 | T3 | N2 | NA | NA | Alive | NA |
| GSM387876 | male | ＜64 | NA | NA | NA | II | Dead | diffuse |
| GSM387924 | female | ＜64 | NA | NA | NA | IV | Alive | diffuse |
| GSM2235803 | male | ＜64 | T3 | N0 | NA | NA | Alive | NA |
| GSM2235983 | male | ＜64 | T3 | N1 | NA | NA | Alive | NA |
| GSM2235718 | male | ＜64 | T4 | N1 | NA | NA | Alive | NA |
| GSM2235768 | male | ＜64 | T4 | N1 | NA | NA | Alive | NA |
| GSM2235900 | male | ＜64 | T4 | N1 | NA | NA | Alive | NA |
| GSM2235626 | male | ＜64 | T4 | N2 | NA | NA | Alive | NA |
| GSM2235716 | male | ＜64 | T3 | N1 | NA | NA | Dead | NA |
| GSM387963 | male | ＜64 | NA | NA | NA | III | Alive | indeterminate |
| GSM387939 | female | ＜64 | NA | NA | NA | I | Alive | diffuse |
| GSM1379309 | NA | ＜64 | T3 | N0 | M0 | II | Alive | NA |
| GSM1379298 | NA | ＜64 | T3 | N2 | M0 | III | Alive | NA |
| GSM2235944 | male | ＜64 | T3 | N0 | NA | NA | Alive | NA |
| GSM2235926 | male | ＜64 | T4 | N2 | NA | NA | Alive | NA |
| GSM1379271 | NA | ＜64 | T3 | N2 | M0 | III | Dead | NA |
| GSM1379329 | NA | ＜64 | T3 | N2 | M1 | IV | Dead | NA |
| GSM2235774 | male | ＜64 | T4 | N1 | NA | NA | Dead | NA |
| GSM2235827 | male | ＜64 | T4 | N2 | NA | NA | Dead | NA |
| GSM2236067 | male | ＜64 | T4 | N2 | NA | NA | Dead | NA |
| GSM2236060 | male | ＜64 | T4 | N3 | NA | NA | Dead | NA |
| GSM2235557 | female | ＜64 | T4 | N3 | NA | NA | Dead | NA |
| GSM387888 | female | ＜64 | NA | NA | NA | I | Alive | diffuse |
| GSM387831 | male | ＜64 | NA | NA | NA | IV | Dead | diffuse |
| GSM387902 | female | ＜64 | NA | NA | NA | II | Dead | indeterminate |
| GSM2236043 | male | ＜64 | T3 | N1 | NA | NA | Alive | NA |
| GSM2236063 | female | ＜64 | T2 | N1 | NA | NA | Alive | NA |
| GSM2236044 | male | ＜64 | T2 | N2 | NA | NA | Alive | NA |
| GSM2235955 | male | ＜64 | T4 | N2 | NA | NA | Alive | NA |
| GSM2235756 | female | ＜64 | T4 | N2 | NA | NA | Alive | NA |
| GSM2236001 | female | ＜64 | T4 | N2 | NA | NA | Alive | NA |
| GSM2235899 | male | ＜64 | T4 | N1 | NA | NA | Dead | NA |
| GSM2235816 | male | ＜64 | T4 | N3 | NA | NA | Dead | NA |
| GSM387927 | female | ＜64 | NA | NA | NA | IV | Dead | diffuse |
| GSM387867 | female | ＜64 | NA | NA | NA | II | Dead | diffuse |
| GSM387801 | female | ＜64 | NA | NA | NA | I | Alive | indeterminate |
| GSM1379323 | NA | ＜64 | T2 | N0 | M0 | I | Alive | NA |
| GSM1379266 | NA | ＜64 | T3 | N1 | M0 | III | Alive | NA |
| GSM1379297 | NA | ＜64 | T2 | N2 | M0 | III | Alive | NA |
| GSM2235741 | male | ＜64 | T4 | N2 | NA | NA | Alive | NA |
| GSM2235697 | male | ＜64 | T3 | N0 | NA | NA | Dead | NA |
| GSM2235565 | female | ＜64 | T4 | N0 | NA | NA | Dead | NA |
| GSM2236054 | female | ＜64 | T4 | N0 | NA | NA | Dead | NA |
| GSM2235777 | female | ＜64 | T4 | N1 | NA | NA | Dead | NA |
| GSM2235824 | female | ＜64 | T4 | N2 | NA | NA | Dead | NA |
| GSM2236047 | female | ＜64 | T4 | N2 | NA | NA | Dead | NA |
| GSM2236072 | male | ＜64 | T3 | N3 | NA | NA | Dead | NA |
| GSM387869 | male | ＜64 | NA | NA | NA | III | Dead | mixed |
| GSM387926 | female | ＜64 | NA | NA | NA | IV | Alive | diffuse |
| GSM387857 | male | ＜64 | NA | NA | NA | III | Dead | diffuse |
| GSM2235801 | male | ＜64 | T2 | N1 | NA | NA | Alive | NA |
| GSM2235903 | male | ＜64 | T4 | N1 | NA | NA | Alive | NA |
| GSM2236041 | male | ＜64 | T4 | N1 | NA | NA | Alive | NA |
| GSM2235786 | female | ＜64 | T4 | N1 | NA | NA | Alive | NA |
| GSM1379276 | NA | ＜64 | T3 | N2 | M0 | III | Dead | NA |
| GSM1379291 | NA | ＜64 | T4 | N1 | M0 | IV | Dead | NA |
| GSM2235622 | male | ＜64 | T3 | N2 | NA | NA | Dead | NA |
| GSM858085 | female | ＜64 | NA | NA | NA | I | Alive | indeterminate |
| GSM387977 | female | ＜64 | NA | NA | NA | III | Dead | indeterminate |
| GSM387833 | male | ＜64 | NA | NA | NA | III | Dead | indeterminate |
| GSM2236095 | male | ＜64 | T4 | N0 | NA | NA | Alive | NA |
| GSM2235850 | male | ＜64 | T2 | N1 | NA | NA | Alive | NA |
| GSM2235982 | male | ＜64 | T3 | N2 | NA | NA | Alive | NA |
| GSM2235878 | female | ＜64 | T4 | N3 | NA | NA | Alive | NA |
| GSM1379289 | NA | ＜64 | T4 | N2 | M1 | IV | Dead | NA |
| GSM2235567 | male | ＜64 | T4 | N2 | NA | NA | Dead | NA |
| GSM2235737 | male | ＜64 | T4 | N2 | NA | NA | Dead | NA |
| GSM2235845 | male | ＜64 | T4 | N2 | NA | NA | Dead | NA |
| GSM387905 | female | ＜64 | NA | NA | NA | IV | Dead | diffuse |
| GSM2235968 | male | ＜64 | T2 | N0 | NA | NA | Alive | NA |
| GSM2235829 | male | ＜64 | T4 | N0 | NA | NA | Alive | NA |
| GSM2236031 | female | ＜64 | T4 | N0 | NA | NA | Alive | NA |
| GSM2235723 | male | ＜64 | T3 | N2 | NA | NA | Alive | NA |
| GSM2235573 | male | ＜64 | T4 | N2 | NA | NA | Alive | NA |
| GSM2235848 | male | ＜64 | T4 | N2 | NA | NA | Dead | NA |
| GSM387818 | male | ＜64 | NA | NA | NA | II | Alive | indeterminate |
| GSM387931 | female | ＜64 | NA | NA | NA | I | Alive | diffuse |
| GSM387820 | male | ＜64 | NA | NA | NA | IV | Alive | indeterminate |
| GSM387836 | male | ＜64 | NA | NA | NA | III | Dead | diffuse |
| GSM2235625 | female | ＜64 | T4 | N0 | NA | NA | Alive | NA |
| GSM2236082 | female | ＜64 | T4 | N0 | NA | NA | Alive | NA |
| GSM2235746 | male | ＜64 | T3 | N1 | NA | NA | Alive | NA |
| GSM2235771 | male | ＜64 | T4 | N1 | NA | NA | Alive | NA |
| GSM2235704 | female | ＜64 | T4 | N1 | NA | NA | Alive | NA |
| GSM2235847 | female | ＜64 | T4 | N1 | NA | NA | Alive | NA |
| GSM2235735 | male | ＜64 | T3 | N2 | NA | NA | Alive | NA |
| GSM2235600 | male | ＜64 | T4 | N2 | NA | NA | Alive | NA |
| GSM2235745 | male | ＜64 | T4 | N2 | NA | NA | Alive | NA |
| GSM2236022 | male | ＜64 | T4 | N3 | NA | NA | Alive | NA |
| GSM2235986 | female | ＜64 | T3 | N3 | NA | NA | Alive | NA |
| GSM2235996 | female | ＜64 | T4 | N1 | NA | NA | Dead | NA |
| GSM2235767 | male | ＜64 | T4 | N2 | NA | NA | Dead | NA |
| GSM2236016 | male | ＜64 | T4 | N2 | NA | NA | Dead | NA |
| GSM2235747 | female | ＜64 | T4 | N2 | NA | NA | Dead | NA |
| GSM387821 | female | ＜64 | NA | NA | NA | I | Alive | indeterminate |
| GSM387819 | male | ＜64 | NA | NA | NA | IV | Dead | diffuse |
| GSM387891 | female | ＜64 | NA | NA | NA | I | Alive | diffuse |
| GSM858103 | male | ＜64 | NA | NA | NA | I | Dead | indeterminate |
| GSM387964 | female | ＜64 | NA | NA | NA | IV | Dead | indeterminate |
| GSM858105 | male | ＜64 | NA | NA | NA | II | Dead | indeterminate |
| GSM1379301 | NA | ＜64 | T3 | N1 | M0 | III | Alive | NA |
| GSM2236056 | male | ＜64 | T4 | N0 | NA | NA | Alive | NA |
| GSM2235988 | female | ＜64 | T1 | N0 | NA | NA | Alive | NA |
| GSM2235709 | female | ＜64 | T2 | N0 | NA | NA | Alive | NA |
| GSM2236024 | male | ＜64 | T3 | N1 | NA | NA | Alive | NA |
| GSM2235979 | female | ＜64 | T2 | N1 | NA | NA | Alive | NA |
| GSM2236071 | female | ＜64 | T4 | N1 | NA | NA | Alive | NA |
| GSM2235617 | male | ＜64 | T4 | N2 | NA | NA | Alive | NA |
| GSM2235924 | male | ＜64 | T4 | N2 | NA | NA | Alive | NA |
| GSM2235844 | female | ＜64 | T4 | N2 | NA | NA | Alive | NA |
| GSM2235937 | female | ＜64 | T4 | N2 | NA | NA | Alive | NA |
| GSM2235710 | male | ＜64 | T4 | N0 | NA | NA | Dead | NA |
| GSM2235810 | male | ＜64 | T4 | N1 | NA | NA | Dead | NA |
| GSM2235864 | male | ＜64 | T4 | N1 | NA | NA | Dead | NA |
| GSM2235605 | female | ＜64 | T4 | N1 | NA | NA | Dead | NA |
| GSM2235759 | male | ＜64 | T4 | N2 | NA | NA | Dead | NA |
| GSM858122 | male | ＜64 | NA | NA | NA | NA | Dead | NA |
| GSM858119 | female | ＜64 | NA | NA | NA | I | Alive | indeterminate |
| GSM1379326 | NA | ＜64 | T3 | N2 | M0 | III | Alive | NA |
| GSM2236034 | male | ＜64 | T4 | N0 | NA | NA | Alive | NA |
| GSM2236055 | male | ＜64 | T4 | N0 | NA | NA | Alive | NA |
| GSM2236085 | male | ＜64 | T4 | N0 | NA | NA | Alive | NA |
| GSM2235794 | male | ＜64 | T1 | N1 | NA | NA | Alive | NA |
| GSM2235608 | male | ＜64 | T3 | N1 | NA | NA | Alive | NA |
| GSM2235822 | male | ＜64 | T3 | N1 | NA | NA | Alive | NA |
| GSM2235828 | male | ＜64 | T4 | N1 | NA | NA | Alive | NA |
| GSM2235961 | male | ＜64 | T4 | N1 | NA | NA | Alive | NA |
| GSM2236003 | male | ＜64 | T4 | N1 | NA | NA | Alive | NA |
| GSM2235619 | female | ＜64 | T4 | N1 | NA | NA | Alive | NA |
| GSM2235946 | male | ＜64 | T4 | N2 | NA | NA | Alive | NA |
| GSM2235958 | male | ＜64 | T4 | N2 | NA | NA | Alive | NA |
| GSM1379328 | NA | ＜64 | T3 | N3 | M0 | IV | Dead | NA |
| GSM2235806 | male | ＜64 | T4 | N0 | NA | NA | Dead | NA |
| GSM2235882 | male | ＜64 | T4 | N1 | NA | NA | Dead | NA |
| GSM2235811 | male | ＜64 | T4 | N2 | NA | NA | Dead | NA |
| GSM387955 | male | ＜64 | NA | NA | NA | III | Dead | diffuse |
| GSM387835 | female | ＜64 | NA | NA | NA | III | Dead | diffuse |
| GSM387840 | male | ＜64 | NA | NA | NA | I | Alive | diffuse |
| GSM387794 | male | ＜64 | NA | NA | NA | IV | Dead | indeterminate |
| GSM2235720 | male | ＜64 | T1 | N0 | NA | NA | Alive | NA |
| GSM2235781 | male | ＜64 | T1 | N0 | NA | NA | Alive | NA |
| GSM2235788 | male | ＜64 | T2 | N0 | NA | NA | Alive | NA |
| GSM2236039 | male | ＜64 | T2 | N0 | NA | NA | Alive | NA |
| GSM2235593 | male | ＜64 | T4 | N0 | NA | NA | Alive | NA |
| GSM2235837 | female | ＜64 | T2 | N0 | NA | NA | Alive | NA |
| GSM2235910 | male | ＜64 | T4 | N1 | NA | NA | Alive | NA |
| GSM2235928 | female | ＜64 | T4 | N1 | NA | NA | Alive | NA |
| GSM1379302 | NA | ＜64 | T3 | N1 | M0 | III | Dead | NA |
| GSM1379307 | NA | ＜64 | T4 | N2 | M0 | IV | Dead | NA |
| GSM1379275 | NA | ＜64 | T2 | N2 | M1 | IV | Dead | NA |
| GSM2235623 | male | ＜64 | T3 | N1 | NA | NA | Dead | NA |
| GSM2235588 | male | ＜64 | T4 | N1 | NA | NA | Dead | NA |
| GSM2235952 | female | ＜64 | T4 | N1 | NA | NA | Dead | NA |
| GSM387861 | male | ＜64 | NA | NA | NA | III | Dead | indeterminate |
| GSM387870 | male | ＜64 | NA | NA | NA | IV | Dead | indeterminate |
| GSM387967 | male | ＜64 | NA | NA | NA | III | Alive | diffuse |
| GSM387909 | male | ＜64 | NA | NA | NA | IV | Dead | diffuse |
| GSM387897 | male | ＜64 | NA | NA | NA | IV | Alive | diffuse |
| GSM858088 | male | ＜64 | NA | NA | NA | III | Alive | indeterminate |
| GSM1379286 | NA | ＜64 | T3 | N2 | M0 | III | Alive | NA |
| GSM2235933 | female | ＜64 | T4 | N0 | NA | NA | Alive | NA |
| GSM2235921 | male | ＜64 | T2 | N2 | NA | NA | Alive | NA |
| GSM1379292 | NA | ＜64 | T3 | N1 | M0 | III | Dead | NA |
| GSM2235995 | female | ＜64 | T3 | N2 | NA | NA | Dead | NA |
| GSM387915 | female | ＜64 | NA | NA | NA | II | Alive | diffuse |
| GSM2236092 | male | ＜64 | T4 | N0 | NA | NA | Alive | NA |
| GSM2235715 | male | ＜64 | T4 | N1 | NA | NA | Alive | NA |
| GSM2235809 | male | ＜64 | T4 | N1 | NA | NA | Alive | NA |
| GSM2235853 | female | ＜64 | T2 | N1 | NA | NA | Alive | NA |
| GSM2235568 | female | ＜64 | T3 | N1 | NA | NA | Alive | NA |
| GSM2236065 | male | ＜64 | T4 | N2 | NA | NA | Alive | NA |
| GSM1379268 | NA | ＜64 | T3 | N0 | M0 | II | Dead | NA |
| GSM2235560 | male | ＜64 | T4 | N0 | NA | NA | Dead | NA |
| GSM2235965 | male | ＜64 | T3 | N1 | NA | NA | Dead | NA |
| GSM2235953 | female | ＜64 | T4 | N1 | NA | NA | Dead | NA |
| GSM2235764 | male | ＜64 | T4 | N2 | NA | NA | Dead | NA |
| GSM2235787 | female | ＜64 | T4 | N2 | NA | NA | Dead | NA |
| GSM2235963 | female | ＜64 | T4 | N2 | NA | NA | Dead | NA |
| GSM387918 | female | ＜64 | NA | NA | NA | I | Alive | diffuse |
| GSM387848 | male | ＜64 | NA | NA | NA | III | Dead | indeterminate |
| GSM387978 | female | ＜64 | NA | NA | NA | II | Dead | diffuse |
| GSM387917 | male | ＜64 | NA | NA | NA | IV | Alive | indeterminate |
| GSM1379263 | NA | ＜64 | T3 | N2 | M0 | III | Alive | NA |
| GSM2236093 | male | ＜64 | T3 | N0 | NA | NA | Alive | NA |
| GSM2235973 | female | ＜64 | T3 | N0 | NA | NA | Alive | NA |
| GSM2235575 | male | ＜64 | T3 | N1 | NA | NA | Alive | NA |
| GSM2235624 | male | ＜64 | T3 | N1 | NA | NA | Alive | NA |
| GSM2235992 | male | ＜64 | T4 | N1 | NA | NA | Alive | NA |
| GSM2235700 | male | ＜64 | T4 | N2 | NA | NA | Alive | NA |
| GSM2236084 | female | ＜64 | T3 | N2 | NA | NA | Alive | NA |
| GSM2235738 | female | ＜64 | T4 | N2 | NA | NA | Alive | NA |
| GSM2235975 | male | ＜64 | T3 | N3 | NA | NA | Alive | NA |
| GSM1379279 | NA | ＜64 | T3 | N2 | M0 | III | Dead | NA |
| GSM2235713 | male | ＜64 | T4 | N0 | NA | NA | Dead | NA |
| GSM2235808 | male | ＜64 | T4 | N1 | NA | NA | Dead | NA |
| GSM2235945 | female | ＜64 | T4 | N1 | NA | NA | Dead | NA |
| GSM387920 | male | ＜64 | NA | NA | NA | III | Alive | indeterminate |
| GSM387960 | male | ＜64 | NA | NA | NA | III | Dead | indeterminate |
| GSM387950 | male | ＜64 | NA | NA | NA | III | Dead | diffuse |
| GSM387987 | male | ＜64 | NA | NA | NA | IV | Dead | indeterminate |
| GSM387850 | female | ＜64 | NA | NA | NA | IV | Dead | diffuse |
| GSM1379324 | NA | ＜64 | T3 | N2 | M0 | III | Alive | NA |
| GSM2235802 | male | ＜64 | T1 | N0 | NA | NA | Alive | NA |
| GSM2236078 | male | ＜64 | T4 | N0 | NA | NA | Alive | NA |
| GSM2235632 | male | ＜64 | T3 | N1 | NA | NA | Alive | NA |
| GSM2235696 | male | ＜64 | T4 | N1 | NA | NA | Alive | NA |
| GSM2235775 | male | ＜64 | T4 | N1 | NA | NA | Alive | NA |
| GSM2235603 | female | ＜64 | T4 | N1 | NA | NA | Alive | NA |
| GSM1379293 | NA | ＜64 | T3 | N0 | M0 | II | Dead | NA |
| GSM1379262 | NA | ＜64 | T3 | N2 | M0 | III | Dead | NA |
| GSM2235843 | male | ＜64 | T2 | N1 | NA | NA | Dead | NA |
| GSM2235999 | male | ＜64 | T4 | N1 | NA | NA | Dead | NA |
| GSM2235792 | female | ＜64 | T4 | N1 | NA | NA | Dead | NA |
| GSM2235772 | male | ＜64 | T4 | N2 | NA | NA | Dead | NA |
| GSM2236073 | male | ＜64 | T4 | N2 | NA | NA | Dead | NA |
| GSM2235563 | female | ＜64 | T3 | N2 | NA | NA | Dead | NA |
| GSM858087 | male | ＜64 | NA | NA | NA | III | Alive | indeterminate |
| GSM387971 | male | ＜64 | NA | NA | NA | III | Dead | indeterminate |
| GSM858100 | male | ＜64 | NA | NA | NA | III | Dead | mixed |
| GSM387922 | male | ＜64 | NA | NA | NA | I | Alive | indeterminate |
| GSM858089 | male | ＜64 | NA | NA | NA | IV | Alive | diffuse |
| GSM1379318 | NA | ＜64 | T2 | N0 | M0 | I | Alive | NA |
| GSM1379305 | NA | ＜64 | T3 | N2 | M0 | III | Alive | NA |
| GSM1379312 | NA | ＜64 | T3 | N2 | M0 | III | Alive | NA |
| GSM2235701 | male | ＜64 | T3 | N0 | NA | NA | Alive | NA |
| GSM2236023 | female | ＜64 | T2 | N0 | NA | NA | Alive | NA |
| GSM2235564 | male | ＜64 | T3 | N1 | NA | NA | Alive | NA |
| GSM2236052 | male | ＜64 | T4 | N1 | NA | NA | Alive | NA |
| GSM2235602 | female | ＜64 | T3 | N1 | NA | NA | Alive | NA |
| GSM2235959 | male | ＜64 | T3 | N2 | NA | NA | Alive | NA |
| GSM1379303 | NA | ＜64 | T3 | N1 | M0 | III | Dead | NA |
| GSM2236088 | female | ＜64 | T4 | N0 | NA | NA | Dead | NA |
| GSM2235714 | male | ＜64 | T2 | N1 | NA | NA | Dead | NA |
| GSM2235556 | male | ＜64 | T3 | N1 | NA | NA | Dead | NA |
| GSM2236010 | male | ＜64 | T4 | N1 | NA | NA | Dead | NA |
| GSM2235805 | female | ＜64 | T4 | N1 | NA | NA | Dead | NA |
| GSM2235951 | female | ＜64 | T4 | N1 | NA | NA | Dead | NA |
| GSM2235580 | male | ＜64 | T4 | N2 | NA | NA | Dead | NA |
| GSM2235736 | male | ＜64 | T4 | N2 | NA | NA | Dead | NA |
| GSM2235766 | male | ＜64 | T4 | N2 | NA | NA | Dead | NA |
| GSM2235967 | male | ＜64 | T4 | N2 | NA | NA | Dead | NA |
| GSM2236017 | male | ＜64 | T4 | N2 | NA | NA | Dead | NA |
| GSM2235849 | female | ＜64 | T4 | N2 | NA | NA | Dead | NA |
| GSM2235778 | male | ＜64 | T4 | N3 | NA | NA | Dead | NA |
| GSM387828 | female | ＜64 | NA | NA | NA | III | Alive | mixed |
| GSM387851 | male | ＜64 | NA | NA | NA | IV | Dead | diffuse |
| GSM387946 | female | ＜64 | NA | NA | NA | II | Dead | diffuse |
| GSM387852 | male | ＜64 | NA | NA | NA | IV | Dead | mixed |
| GSM858084 | male | ＜64 | NA | NA | NA | III | Dead | diffuse |
| GSM858117 | female | ＜64 | NA | NA | NA | III | Alive | diffuse |
| GSM858098 | female | ＜64 | NA | NA | NA | II | Dead | indeterminate |
| GSM2235938 | female | ＜64 | T1 | N0 | NA | NA | Alive | NA |
| GSM2236036 | male | ＜64 | T1 | N1 | NA | NA | Alive | NA |
| GSM2236058 | male | ＜64 | T2 | N1 | NA | NA | Alive | NA |
| GSM2236074 | male | ＜64 | T2 | N1 | NA | NA | Alive | NA |
| GSM2235800 | male | ＜64 | T3 | N1 | NA | NA | Alive | NA |
| GSM2235947 | male | ＜64 | T4 | N1 | NA | NA | Alive | NA |
| GSM2235599 | male | ＜64 | T3 | N2 | NA | NA | Alive | NA |
| GSM1379273 | NA | ＜64 | T3 | N2 | M0 | III | Dead | NA |
| GSM2236080 | male | ＜64 | T4 | N0 | NA | NA | Dead | NA |
| GSM2236057 | male | ＜64 | T2 | N1 | NA | NA | Dead | NA |
| GSM2235904 | male | ＜64 | T4 | N1 | NA | NA | Dead | NA |
| GSM2235755 | female | ＜64 | T4 | N1 | NA | NA | Dead | NA |
| GSM2235742 | male | ＜64 | T4 | N2 | NA | NA | Dead | NA |
| GSM2235782 | male | ＜64 | T4 | N2 | NA | NA | Dead | NA |
| GSM2235796 | male | ＜64 | T4 | N3 | NA | NA | Dead | NA |
| GSM2235799 | male | ＜64 | T4 | N3 | NA | NA | Dead | NA |
| GSM387908 | male | ＜64 | NA | NA | NA | III | Dead | indeterminate |
| GSM387838 | male | ＜64 | NA | NA | NA | III | Dead | indeterminate |
| GSM858134 | male | ＜64 | NA | NA | NA | I | Alive | indeterminate |
| GSM387890 | male | ＜64 | NA | NA | NA | III | Alive | diffuse |
| GSM387872 | male | ＜64 | NA | NA | NA | I | Alive | indeterminate |
| GSM2236030 | male | ＜64 | T4 | N0 | NA | NA | Alive | NA |
| GSM2235936 | female | ＜64 | T1 | N0 | NA | NA | Alive | NA |
| GSM2235596 | male | ＜64 | T3 | N1 | NA | NA | Alive | NA |
| GSM2236076 | male | ＜64 | T3 | N1 | NA | NA | Alive | NA |
| GSM2236045 | male | ＜64 | T4 | N1 | NA | NA | Alive | NA |
| GSM2235707 | female | ＜64 | T2 | N1 | NA | NA | Alive | NA |
| GSM2235731 | female | ＜64 | T2 | N1 | NA | NA | Alive | NA |
| GSM2235761 | female | ＜64 | T4 | N1 | NA | NA | Alive | NA |
| GSM2236066 | female | ＜64 | T4 | N1 | NA | NA | Alive | NA |
| GSM2235934 | male | ＜64 | T4 | N2 | NA | NA | Alive | NA |
| GSM1379274 | NA | ＜64 | T3 | N1 | M0 | III | Dead | NA |
| GSM1379311 | NA | ＜64 | T2 | N2 | M0 | III | Dead | NA |
| GSM1379299 | NA | ＜64 | T4 | N1 | M0 | IV | Dead | NA |
| GSM1379265 | NA | ＜64 | T4 | N2 | M0 | IV | Dead | NA |
| GSM2235779 | male | ＜64 | T4 | N0 | NA | NA | Dead | NA |
| GSM2235839 | male | ＜64 | T3 | N1 | NA | NA | Dead | NA |
| GSM2235905 | male | ＜64 | T4 | N1 | NA | NA | Dead | NA |
| GSM2235621 | male | ＜64 | T4 | N2 | NA | NA | Dead | NA |
| GSM2235633 | male | ＜64 | T4 | N2 | NA | NA | Dead | NA |
| GSM2235909 | male | ＜64 | T4 | N2 | NA | NA | Dead | NA |
| GSM2235930 | male | ＜64 | T4 | N2 | NA | NA | Dead | NA |
| GSM2235940 | male | ＜64 | T4 | N2 | NA | NA | Dead | NA |
| GSM2235974 | male | ＜64 | T4 | N2 | NA | NA | Dead | NA |
| GSM2235722 | female | ＜64 | T4 | N2 | NA | NA | Dead | NA |
| GSM387878 | female | ＜64 | NA | NA | NA | II | Alive | diffuse |
| GSM387930 | male | ＜64 | NA | NA | NA | III | Dead | indeterminate |
| GSM1379320 | NA | ＞＝64 | T3 | N1 | M0 | III | Alive | NA |
| GSM1379296 | NA | ＞＝64 | T3 | N2 | M0 | III | Alive | NA |
| GSM2236048 | male | ＞＝64 | T3 | N0 | NA | NA | Alive | NA |
| GSM2235804 | male | ＞＝64 | T4 | N0 | NA | NA | Alive | NA |
| GSM2235785 | female | ＞＝64 | T3 | N0 | NA | NA | Alive | NA |
| GSM2235925 | male | ＞＝64 | T4 | N1 | NA | NA | Alive | NA |
| GSM2236000 | female | ＞＝64 | T3 | N1 | NA | NA | Alive | NA |
| GSM2235634 | female | ＞＝64 | T4 | N1 | NA | NA | Alive | NA |
| GSM2236037 | female | ＞＝64 | T4 | N1 | NA | NA | Alive | NA |
| GSM1379261 | NA | ＞＝64 | T3 | N1 | M0 | III | Dead | NA |
| GSM2235813 | male | ＞＝64 | T3 | N0 | NA | NA | Dead | NA |
| GSM2236094 | male | ＞＝64 | T4 | N0 | NA | NA | Dead | NA |
| GSM2235962 | male | ＞＝64 | T4 | N1 | NA | NA | Dead | NA |
| GSM2236046 | male | ＞＝64 | T4 | N1 | NA | NA | Dead | NA |
| GSM2236008 | female | ＞＝64 | T3 | N1 | NA | NA | Dead | NA |
| GSM2235743 | female | ＞＝64 | T4 | N1 | NA | NA | Dead | NA |
| GSM2235769 | male | ＞＝64 | T3 | N2 | NA | NA | Dead | NA |
| GSM2236011 | male | ＞＝64 | T3 | N2 | NA | NA | Dead | NA |
| GSM2235760 | male | ＞＝64 | T4 | N2 | NA | NA | Dead | NA |
| GSM2235789 | male | ＞＝64 | T4 | N2 | NA | NA | Dead | NA |
| GSM2235964 | male | ＞＝64 | T4 | N2 | NA | NA | Dead | NA |
| GSM2236083 | female | ＞＝64 | T4 | N2 | NA | NA | Dead | NA |
| GSM387873 | male | ＞＝64 | NA | NA | NA | III | Alive | diffuse |
| GSM387901 | male | ＞＝64 | NA | NA | NA | I | Alive | indeterminate |
| GSM387862 | male | ＞＝64 | NA | NA | NA | IV | Dead | diffuse |
| GSM387962 | male | ＞＝64 | NA | NA | NA | III | Dead | indeterminate |
| GSM387817 | female | ＞＝64 | NA | NA | NA | I | Alive | indeterminate |
| GSM387823 | male | ＞＝64 | NA | NA | NA | IV | Dead | indeterminate |
| GSM387906 | female | ＞＝64 | NA | NA | NA | III | Alive | diffuse |
| GSM387879 | male | ＞＝64 | NA | NA | NA | I | Dead | diffuse |
| GSM387981 | male | ＞＝64 | NA | NA | NA | III | Dead | indeterminate |
| GSM387980 | male | ＞＝64 | NA | NA | NA | III | Dead | diffuse |
| GSM858082 | female | ＞＝64 | NA | NA | NA | III | Dead | indeterminate |
| GSM387865 | male | ＞＝64 | NA | NA | NA | IV | Dead | diffuse |
| GSM387965 | male | ＞＝64 | NA | NA | NA | II | Alive | indeterminate |
| GSM387945 | female | ＞＝64 | NA | NA | NA | III | Alive | indeterminate |
| GSM387807 | male | ＞＝64 | NA | NA | NA | II | Alive | indeterminate |
| GSM858111 | female | ＞＝64 | NA | NA | NA | II | Dead | indeterminate |
| GSM2235725 | female | ＞＝64 | T4 | N0 | NA | NA | Alive | NA |
| GSM2236050 | male | ＞＝64 | T3 | N1 | NA | NA | Alive | NA |
| GSM2235630 | male | ＞＝64 | T4 | N1 | NA | NA | Alive | NA |
| GSM2235943 | male | ＞＝64 | T4 | N1 | NA | NA | Alive | NA |
| GSM2235620 | male | ＞＝64 | T3 | N2 | NA | NA | Alive | NA |
| GSM2235978 | male | ＞＝64 | T4 | N2 | NA | NA | Alive | NA |
| GSM2236038 | male | ＞＝64 | T4 | N2 | NA | NA | Alive | NA |
| GSM1379315 | NA | ＞＝64 | T3 | N2 | M0 | III | Dead | NA |
| GSM1379321 | NA | ＞＝64 | T4 | N1 | M0 | IV | Dead | NA |
| GSM1379295 | NA | ＞＝64 | T4 | N1 | M1 | IV | Dead | NA |
| GSM1379327 | NA | ＞＝64 | T2 | N2 | M1 | IV | Dead | NA |
| GSM2235582 | male | ＞＝64 | T4 | N0 | NA | NA | Dead | NA |
| GSM2236026 | male | ＞＝64 | T3 | N1 | NA | NA | Dead | NA |
| GSM2235711 | male | ＞＝64 | T4 | N1 | NA | NA | Dead | NA |
| GSM2235927 | male | ＞＝64 | T4 | N1 | NA | NA | Dead | NA |
| GSM2235607 | male | ＞＝64 | T3 | N2 | NA | NA | Dead | NA |
| GSM2235762 | male | ＞＝64 | T4 | N2 | NA | NA | Dead | NA |
| GSM2235935 | male | ＞＝64 | T4 | N2 | NA | NA | Dead | NA |
| GSM2235749 | male | ＞＝64 | T4 | N3 | NA | NA | Dead | NA |
| GSM2235838 | male | ＞＝64 | T4 | N3 | NA | NA | Dead | NA |
| GSM387947 | male | ＞＝64 | NA | NA | NA | IV | Dead | indeterminate |
| GSM387899 | female | ＞＝64 | NA | NA | NA | III | Dead | diffuse |
| GSM387885 | male | ＞＝64 | NA | NA | NA | III | Alive | diffuse |
| GSM387853 | male | ＞＝64 | NA | NA | NA | IV | Dead | indeterminate |
| GSM387829 | male | ＞＝64 | NA | NA | NA | II | Alive | indeterminate |
| GSM387928 | male | ＞＝64 | NA | NA | NA | II | Alive | mixed |
| GSM858123 | female | ＞＝64 | NA | NA | NA | IV | Dead | indeterminate |
| GSM387948 | male | ＞＝64 | NA | NA | NA | III | Alive | indeterminate |
| GSM858090 | male | ＞＝64 | NA | NA | NA | III | Dead | mixed |
| GSM1379264 | NA | ＞＝64 | T3 | N0 | M0 | II | Alive | NA |
| GSM1379284 | NA | ＞＝64 | T3 | N0 | M0 | II | Alive | NA |
| GSM2235631 | female | ＞＝64 | T4 | N0 | NA | NA | Alive | NA |
| GSM2235708 | male | ＞＝64 | T4 | N1 | NA | NA | Alive | NA |
| GSM2235960 | male | ＞＝64 | T4 | N1 | NA | NA | Alive | NA |
| GSM2235589 | male | ＞＝64 | T4 | N2 | NA | NA | Alive | NA |
| GSM2236015 | male | ＞＝64 | T4 | N2 | NA | NA | Alive | NA |
| GSM2235814 | male | ＞＝64 | T4 | N3 | NA | NA | Alive | NA |
| GSM2235854 | female | ＞＝64 | T4 | N3 | NA | NA | Alive | NA |
| GSM1379304 | NA | ＞＝64 | T4 | N0 | M1 | IV | Dead | NA |
| GSM2235862 | male | ＞＝64 | T4 | N0 | NA | NA | Dead | NA |
| GSM2235889 | male | ＞＝64 | T4 | N1 | NA | NA | Dead | NA |
| GSM2235980 | male | ＞＝64 | T4 | N1 | NA | NA | Dead | NA |
| GSM2236004 | male | ＞＝64 | T4 | N1 | NA | NA | Dead | NA |
| GSM2236009 | male | ＞＝64 | T4 | N1 | NA | NA | Dead | NA |
| GSM2235901 | female | ＞＝64 | T3 | N1 | NA | NA | Dead | NA |
| GSM2235739 | male | ＞＝64 | T3 | N2 | NA | NA | Dead | NA |
| GSM2235883 | female | ＞＝64 | T4 | N2 | NA | NA | Dead | NA |
| GSM2235970 | female | ＞＝64 | T4 | N2 | NA | NA | Dead | NA |
| GSM387880 | female | ＞＝64 | NA | NA | NA | I | Alive | diffuse |
| GSM387929 | male | ＞＝64 | NA | NA | NA | IV | Dead | diffuse |
| GSM387949 | male | ＞＝64 | NA | NA | NA | III | Alive | mixed |
| GSM387932 | male | ＞＝64 | NA | NA | NA | IV | Dead | indeterminate |
| GSM858136 | male | ＞＝64 | NA | NA | NA | IV | Alive | diffuse |
| GSM387887 | male | ＞＝64 | NA | NA | NA | IV | Dead | indeterminate |
| GSM387860 | male | ＞＝64 | NA | NA | NA | IV | Alive | indeterminate |
| GSM387841 | female | ＞＝64 | NA | NA | NA | IV | Dead | diffuse |
| GSM387893 | female | ＞＝64 | NA | NA | NA | III | Alive | diffuse |
| GSM387943 | male | ＞＝64 | NA | NA | NA | IV | Alive | diffuse |
| GSM387796 | male | ＞＝64 | NA | NA | NA | III | Dead | indeterminate |
| GSM858112 | male | ＞＝64 | NA | NA | NA | I | Alive | indeterminate |
| GSM1379267 | NA | ＞＝64 | T3 | N0 | M0 | II | Alive | NA |
| GSM1379306 | NA | ＞＝64 | T3 | N1 | M0 | III | Alive | NA |
| GSM2235942 | male | ＞＝64 | T1 | N0 | NA | NA | Alive | NA |
| GSM2235863 | male | ＞＝64 | T4 | N0 | NA | NA | Alive | NA |
| GSM2235790 | female | ＞＝64 | T4 | N0 | NA | NA | Alive | NA |
| GSM2236079 | male | ＞＝64 | T2 | N1 | NA | NA | Alive | NA |
| GSM2235705 | male | ＞＝64 | T4 | N1 | NA | NA | Alive | NA |
| GSM2235821 | male | ＞＝64 | T4 | N1 | NA | NA | Alive | NA |
| GSM2235976 | female | ＞＝64 | T3 | N1 | NA | NA | Alive | NA |
| GSM2235972 | male | ＞＝64 | T4 | N3 | NA | NA | Alive | NA |
| GSM2236013 | female | ＞＝64 | T2 | N1 | NA | NA | Dead | NA |
| GSM2235729 | male | ＞＝64 | T4 | N2 | NA | NA | Dead | NA |
| GSM2235846 | male | ＞＝64 | T4 | N2 | NA | NA | Dead | NA |
| GSM2235880 | female | ＞＝64 | T4 | N2 | NA | NA | Dead | NA |
| GSM387827 | female | ＞＝64 | NA | NA | NA | I | Alive | indeterminate |
| GSM387864 | female | ＞＝64 | NA | NA | NA | III | Dead | diffuse |
| GSM387834 | male | ＞＝64 | NA | NA | NA | II | Dead | diffuse |
| GSM387839 | male | ＞＝64 | NA | NA | NA | III | Alive | indeterminate |
| GSM387982 | male | ＞＝64 | NA | NA | NA | II | Alive | diffuse |
| GSM387815 | male | ＞＝64 | NA | NA | NA | II | Alive | indeterminate |
| GSM387936 | male | ＞＝64 | NA | NA | NA | III | Dead | mixed |
| GSM387830 | male | ＞＝64 | NA | NA | NA | III | Dead | diffuse |
| GSM858113 | female | ＞＝64 | NA | NA | NA | III | Dead | diffuse |
| GSM858127 | female | ＞＝64 | NA | NA | NA | IV | Dead | indeterminate |
| GSM1379287 | NA | ＞＝64 | T2 | N0 | M0 | I | Alive | NA |
| GSM1379316 | NA | ＞＝64 | T3 | N3 | M0 | IV | Alive | NA |
| GSM2235597 | male | ＞＝64 | T2 | N1 | NA | NA | Alive | NA |
| GSM2235613 | male | ＞＝64 | T2 | N1 | NA | NA | Alive | NA |
| GSM2235855 | male | ＞＝64 | T2 | N1 | NA | NA | Alive | NA |
| GSM2235627 | male | ＞＝64 | T3 | N1 | NA | NA | Alive | NA |
| GSM2236087 | male | ＞＝64 | T3 | N1 | NA | NA | Alive | NA |
| GSM2235765 | male | ＞＝64 | T4 | N1 | NA | NA | Alive | NA |
| GSM2235922 | male | ＞＝64 | T4 | N1 | NA | NA | Alive | NA |
| GSM2235998 | male | ＞＝64 | T4 | N1 | NA | NA | Alive | NA |
| GSM2236061 | female | ＞＝64 | T2 | N1 | NA | NA | Alive | NA |
| GSM2235572 | female | ＞＝64 | T4 | N1 | NA | NA | Alive | NA |
| GSM2236002 | female | ＞＝64 | T4 | N1 | NA | NA | Alive | NA |
| GSM2235615 | male | ＞＝64 | T3 | N2 | NA | NA | Alive | NA |
| GSM2236077 | male | ＞＝64 | T4 | N2 | NA | NA | Alive | NA |
| GSM1379288 | NA | ＞＝64 | T3 | N2 | M0 | III | Dead | NA |
| GSM2236014 | male | ＞＝64 | T3 | N0 | NA | NA | Dead | NA |
| GSM2236028 | male | ＞＝64 | T3 | N0 | NA | NA | Dead | NA |
| GSM2235819 | male | ＞＝64 | T4 | N1 | NA | NA | Dead | NA |
| GSM2235730 | female | ＞＝64 | T1 | N1 | NA | NA | Dead | NA |
| GSM2235879 | female | ＞＝64 | T3 | N1 | NA | NA | Dead | NA |
| GSM2236025 | female | ＞＝64 | T3 | N1 | NA | NA | Dead | NA |
| GSM2235817 | female | ＞＝64 | T4 | N1 | NA | NA | Dead | NA |
| GSM2235578 | male | ＞＝64 | T4 | N2 | NA | NA | Dead | NA |
| GSM2235719 | male | ＞＝64 | T4 | N2 | NA | NA | Dead | NA |
| GSM2235726 | male | ＞＝64 | T4 | N2 | NA | NA | Dead | NA |
| GSM2235956 | female | ＞＝64 | T4 | N2 | NA | NA | Dead | NA |
| GSM2235699 | male | ＞＝64 | T4 | N3 | NA | NA | Dead | NA |
| GSM2235812 | male | ＞＝64 | T4 | N3 | NA | NA | Dead | NA |
| GSM387952 | male | ＞＝64 | NA | NA | NA | III | Alive | indeterminate |
| GSM858086 | male | ＞＝64 | NA | NA | NA | NA | Dead | NA |
| GSM387871 | male | ＞＝64 | NA | NA | NA | IV | Dead | indeterminate |
| GSM387900 | male | ＞＝64 | NA | NA | NA | I | Alive | indeterminate |
| GSM387898 | female | ＞＝64 | NA | NA | NA | II | Dead | mixed |
| GSM858128 | male | ＞＝64 | NA | NA | NA | IV | Alive | indeterminate |
| GSM387933 | male | ＞＝64 | NA | NA | NA | IV | Alive | diffuse |
| GSM858135 | male | ＞＝64 | NA | NA | NA | II | Alive | indeterminate |
| GSM387913 | male | ＞＝64 | NA | NA | NA | IV | Dead | indeterminate |
| GSM858101 | male | ＞＝64 | NA | NA | NA | III | Dead | indeterminate |
| GSM387800 | male | ＞＝64 | NA | NA | NA | III | Alive | mixed |
| GSM1379285 | NA | ＞＝64 | T3 | N1 | M0 | III | Alive | NA |
| GSM1379325 | NA | ＞＝64 | T3 | N2 | M0 | III | Alive | NA |
| GSM1379300 | NA | ＞＝64 | T4 | N3 | M0 | IV | Alive | NA |
| GSM2236033 | male | ＞＝64 | T3 | N0 | NA | NA | Alive | NA |
| GSM2236089 | female | ＞＝64 | T4 | N0 | NA | NA | Alive | NA |
| GSM2236062 | male | ＞＝64 | T3 | N1 | NA | NA | Alive | NA |
| GSM2236069 | male | ＞＝64 | T3 | N1 | NA | NA | Alive | NA |
| GSM2235981 | male | ＞＝64 | T4 | N1 | NA | NA | Alive | NA |
| GSM2235987 | male | ＞＝64 | T4 | N1 | NA | NA | Alive | NA |
| GSM2235957 | female | ＞＝64 | T3 | N2 | NA | NA | Alive | NA |
| GSM2235867 | female | ＞＝64 | T4 | N2 | NA | NA | Alive | NA |
| GSM2236042 | female | ＞＝64 | T4 | N2 | NA | NA | Alive | NA |
| GSM2235985 | female | ＞＝64 | T4 | N3 | NA | NA | Alive | NA |
| GSM1379314 | NA | ＞＝64 | T3 | N1 | M0 | III | Dead | NA |
| GSM2235825 | male | ＞＝64 | T4 | N0 | NA | NA | Dead | NA |
| GSM2235740 | male | ＞＝64 | T3 | N1 | NA | NA | Dead | NA |
| GSM2235612 | male | ＞＝64 | T4 | N2 | NA | NA | Dead | NA |
| GSM2235852 | male | ＞＝64 | T4 | N3 | NA | NA | Dead | NA |
| GSM2235984 | male | ＞＝64 | T4 | N3 | NA | NA | Dead | NA |
| GSM387954 | male | ＞＝64 | NA | NA | NA | III | Dead | indeterminate |
| GSM387958 | male | ＞＝64 | NA | NA | NA | I | Alive | diffuse |
| GSM858083 | male | ＞＝64 | NA | NA | NA | I | Alive | indeterminate |
| GSM387886 | female | ＞＝64 | NA | NA | NA | II | Alive | mixed |
| GSM858132 | male | ＞＝64 | NA | NA | NA | I | Alive | indeterminate |
| GSM387907 | male | ＞＝64 | NA | NA | NA | III | Alive | mixed |
| GSM387845 | male | ＞＝64 | NA | NA | NA | IV | Dead | indeterminate |
| GSM387951 | male | ＞＝64 | NA | NA | NA | IV | Alive | indeterminate |
| GSM387938 | female | ＞＝64 | NA | NA | NA | IV | Dead | diffuse |
| GSM387825 | male | ＞＝64 | NA | NA | NA | I | Alive | indeterminate |
| GSM858107 | female | ＞＝64 | NA | NA | NA | IV | Dead | diffuse |
| GSM858116 | male | ＞＝64 | NA | NA | NA | III | Alive | indeterminate |
| GSM387811 | male | ＞＝64 | NA | NA | NA | IV | Dead | indeterminate |
| GSM2235712 | female | ＞＝64 | T2 | N0 | NA | NA | Alive | NA |
| GSM2236020 | female | ＞＝64 | T4 | N0 | NA | NA | Alive | NA |
| GSM2236064 | male | ＞＝64 | T4 | N0 | NA | NA | Dead | NA |
| GSM2235750 | male | ＞＝64 | T4 | N1 | NA | NA | Dead | NA |
| GSM2235906 | female | ＞＝64 | T4 | N1 | NA | NA | Dead | NA |
| GSM2235807 | male | ＞＝64 | T4 | N3 | NA | NA | Dead | NA |
| GSM387816 | male | ＞＝64 | NA | NA | NA | IV | Dead | diffuse |
| GSM387923 | male | ＞＝64 | NA | NA | NA | III | Alive | indeterminate |
| GSM858091 | male | ＞＝64 | NA | NA | NA | II | Dead | indeterminate |
| GSM387983 | male | ＞＝64 | NA | NA | NA | III | Dead | diffuse |
| GSM387985 | male | ＞＝64 | NA | NA | NA | II | Alive | indeterminate |
| GSM387849 | male | ＞＝64 | NA | NA | NA | IV | Dead | diffuse |
| GSM858133 | male | ＞＝64 | NA | NA | NA | IV | Dead | indeterminate |
| GSM858099 | male | ＞＝64 | NA | NA | NA | II | Alive | indeterminate |
| GSM858094 | female | ＞＝64 | NA | NA | NA | III | Dead | indeterminate |
| GSM1379277 | NA | ＞＝64 | T3 | N1 | M0 | III | Alive | NA |
| GSM1379308 | NA | ＞＝64 | T3 | N1 | M0 | III | Alive | NA |
| GSM2236070 | male | ＞＝64 | T3 | N1 | NA | NA | Alive | NA |
| GSM2235586 | male | ＞＝64 | T4 | N1 | NA | NA | Alive | NA |
| GSM2236040 | female | ＞＝64 | T3 | N1 | NA | NA | Alive | NA |
| GSM2235815 | female | ＞＝64 | T4 | N2 | NA | NA | Alive | NA |
| GSM2235932 | female | ＞＝64 | T4 | N2 | NA | NA | Alive | NA |
| GSM2235727 | male | ＞＝64 | T4 | N3 | NA | NA | Alive | NA |
| GSM1379281 | NA | ＞＝64 | T3 | N1 | M1 | IV | Dead | NA |
| GSM2235840 | male | ＞＝64 | T2 | N0 | NA | NA | Dead | NA |
| GSM2235585 | male | ＞＝64 | T3 | N1 | NA | NA | Dead | NA |
| GSM2235783 | male | ＞＝64 | T3 | N1 | NA | NA | Dead | NA |
| GSM2235584 | male | ＞＝64 | T4 | N2 | NA | NA | Dead | NA |
| GSM2235706 | male | ＞＝64 | T4 | N2 | NA | NA | Dead | NA |
| GSM387959 | female | ＞＝64 | NA | NA | NA | IV | Dead | indeterminate |
| GSM387824 | female | ＞＝64 | NA | NA | NA | II | Alive | indeterminate |
| GSM387855 | female | ＞＝64 | NA | NA | NA | II | Alive | indeterminate |
| GSM387976 | male | ＞＝64 | NA | NA | NA | II | Alive | indeterminate |
| GSM387881 | male | ＞＝64 | NA | NA | NA | IV | Dead | diffuse |
| GSM858120 | female | ＞＝64 | NA | NA | NA | II | Alive | indeterminate |
| GSM387975 | male | ＞＝64 | NA | NA | NA | III | Dead | indeterminate |
| GSM387804 | female | ＞＝64 | NA | NA | NA | III | Alive | diffuse |
| GSM387812 | male | ＞＝64 | NA | NA | NA | III | Alive | indeterminate |
| GSM2235881 | male | ＞＝64 | T4 | N0 | NA | NA | Alive | NA |
| GSM2235733 | male | ＞＝64 | T3 | N1 | NA | NA | Alive | NA |
| GSM2235969 | female | ＞＝64 | T2 | N1 | NA | NA | Alive | NA |
| GSM2235558 | male | ＞＝64 | T4 | N1 | NA | NA | Dead | NA |
| GSM2235587 | male | ＞＝64 | T4 | N1 | NA | NA | Dead | NA |
| GSM2235753 | male | ＞＝64 | T4 | N1 | NA | NA | Dead | NA |
| GSM2235574 | male | ＞＝64 | T4 | N2 | NA | NA | Dead | NA |
| GSM2235977 | male | ＞＝64 | T4 | N2 | NA | NA | Dead | NA |
| GSM2236005 | female | ＞＝64 | T4 | N2 | NA | NA | Dead | NA |
| GSM2235842 | male | ＞＝64 | T4 | N3 | NA | NA | Dead | NA |
| GSM387974 | female | ＞＝64 | NA | NA | NA | II | Alive | indeterminate |
| GSM387877 | female | ＞＝64 | NA | NA | NA | III | Alive | diffuse |
| GSM858129 | male | ＞＝64 | NA | NA | NA | III | Dead | indeterminate |
| GSM387914 | male | ＞＝64 | NA | NA | NA | III | Dead | indeterminate |
| GSM858114 | female | ＞＝64 | NA | NA | NA | III | Alive | indeterminate |
| GSM858110 | male | ＞＝64 | NA | NA | NA | I | Alive | indeterminate |
| GSM858115 | male | ＞＝64 | NA | NA | NA | II | Alive | indeterminate |
| GSM387808 | male | ＞＝64 | NA | NA | NA | IV | Alive | indeterminate |
| GSM387792 | male | ＞＝64 | NA | NA | NA | IV | Dead | indeterminate |
| GSM387810 | male | ＞＝64 | NA | NA | NA | I | Alive | mixed |
| GSM2235795 | female | ＞＝64 | T4 | N0 | NA | NA | Alive | NA |
| GSM2235885 | female | ＞＝64 | T4 | N1 | NA | NA | Alive | NA |
| GSM2235635 | male | ＞＝64 | T2 | N2 | NA | NA | Alive | NA |
| GSM2235618 | female | ＞＝64 | T4 | N2 | NA | NA | Alive | NA |
| GSM2235616 | male | ＞＝64 | T4 | N1 | NA | NA | Dead | NA |
| GSM2235609 | female | ＞＝64 | T4 | N2 | NA | NA | Dead | NA |
| GSM387957 | male | ＞＝64 | NA | NA | NA | III | Dead | diffuse |
| GSM858102 | female | ＞＝64 | NA | NA | NA | I | Alive | mixed |
| GSM387910 | male | ＞＝64 | NA | NA | NA | IV | Dead | mixed |
| GSM387813 | male | ＞＝64 | NA | NA | NA | I | Alive | indeterminate |
| GSM858096 | male | ＞＝64 | NA | NA | NA | III | Alive | indeterminate |
| GSM1379282 | NA | ＞＝64 | T3 | N0 | M0 | II | Alive | NA |
| GSM1379294 | NA | ＞＝64 | T3 | N1 | M0 | III | Alive | NA |
| GSM2235732 | male | ＞＝64 | T2 | N1 | NA | NA | Alive | NA |
| GSM2235997 | male | ＞＝64 | T4 | N1 | NA | NA | Alive | NA |
| GSM1379280 | NA | ＞＝64 | T3 | N1 | M0 | III | Dead | NA |
| GSM1379313 | NA | ＞＝64 | T3 | N1 | M0 | III | Dead | NA |
| GSM2235579 | male | ＞＝64 | T3 | N1 | NA | NA | Dead | NA |
| GSM2235598 | male | ＞＝64 | T3 | N1 | NA | NA | Dead | NA |
| GSM2235595 | male | ＞＝64 | T4 | N1 | NA | NA | Dead | NA |
| GSM2235702 | female | ＞＝64 | T4 | N1 | NA | NA | Dead | NA |
| GSM2235763 | female | ＞＝64 | T4 | N1 | NA | NA | Dead | NA |
| GSM2235929 | male | ＞＝64 | T4 | N2 | NA | NA | Dead | NA |
| GSM2235724 | male | ＞＝64 | T3 | N3 | NA | NA | Dead | NA |
| GSM2235818 | female | ＞＝64 | T4 | N3 | NA | NA | Dead | NA |
| GSM387919 | male | ＞＝64 | NA | NA | NA | IV | Alive | indeterminate |
| GSM387966 | female | ＞＝64 | NA | NA | NA | I | Alive | indeterminate |
| GSM387826 | female | ＞＝64 | NA | NA | NA | II | Alive | diffuse |
| GSM858125 | male | ＞＝64 | NA | NA | NA | IV | Dead | indeterminate |
| GSM387961 | male | ＞＝64 | NA | NA | NA | IV | Dead | indeterminate |
| GSM858124 | female | ＞＝64 | NA | NA | NA | IV | Alive | indeterminate |
| GSM2235637 | female | ＞＝64 | T4 | N0 | NA | NA | Alive | NA |
| GSM2235604 | male | ＞＝64 | T3 | N1 | NA | NA | Alive | NA |
| GSM2236059 | female | ＞＝64 | T2 | N1 | NA | NA | Alive | NA |
| GSM2235830 | male | ＞＝64 | T4 | N2 | NA | NA | Alive | NA |
| GSM1379283 | NA | ＞＝64 | T3 | N0 | M0 | II | Dead | NA |
| GSM1379310 | NA | ＞＝64 | T3 | N1 | M0 | III | Dead | NA |
| GSM2235820 | male | ＞＝64 | T4 | N1 | NA | NA | Dead | NA |
| GSM2235780 | male | ＞＝64 | T4 | N3 | NA | NA | Dead | NA |
| GSM387904 | male | ＞＝64 | NA | NA | NA | II | Alive | mixed |
| GSM387866 | male | ＞＝64 | NA | NA | NA | III | Dead | diffuse |
| GSM858121 | male | ＞＝64 | NA | NA | NA | III | Dead | diffuse |
| GSM387868 | female | ＞＝64 | NA | NA | NA | II | Alive | diffuse |
| GSM387940 | female | ＞＝64 | NA | NA | NA | III | Dead | diffuse |
| GSM387806 | male | ＞＝64 | NA | NA | NA | III | Alive | diffuse |
| GSM858118 | male | ＞＝64 | NA | NA | NA | IV | Alive | indeterminate |
| GSM387805 | female | ＞＝64 | NA | NA | NA | I | Alive | indeterminate |
| GSM387789 | male | ＞＝64 | NA | NA | NA | IV | Alive | mixed |
| GSM2235886 | female | ＞＝64 | T2 | N1 | NA | NA | Dead | NA |
| GSM2236007 | female | ＞＝64 | T4 | N1 | NA | NA | Dead | NA |
| GSM2235610 | male | ＞＝64 | T4 | N2 | NA | NA | Dead | NA |
| GSM2235798 | male | ＞＝64 | T4 | N2 | NA | NA | Dead | NA |
| GSM387969 | male | ＞＝64 | NA | NA | NA | I | Alive | indeterminate |
| GSM858092 | male | ＞＝64 | NA | NA | NA | IV | Alive | mixed |
| GSM387883 | male | ＞＝64 | NA | NA | NA | II | Alive | indeterminate |
| GSM387842 | male | ＞＝64 | NA | NA | NA | IV | Dead | indeterminate |
| GSM387843 | male | ＞＝64 | NA | NA | NA | IV | Dead | indeterminate |
| GSM858095 | male | ＞＝64 | NA | NA | NA | I | Alive | indeterminate |
| GSM858109 | female | ＞＝64 | NA | NA | NA | III | Dead | indeterminate |
| GSM2235570 | male | ＞＝64 | T4 | N0 | NA | NA | Alive | NA |
| GSM2235907 | female | ＞＝64 | T4 | N0 | NA | NA | Alive | NA |
| GSM2236091 | male | ＞＝64 | T3 | N0 | NA | NA | Dead | NA |
| GSM2235923 | female | ＞＝64 | T4 | N1 | NA | NA | Dead | NA |
| GSM2235991 | male | ＞＝64 | T3 | N2 | NA | NA | Dead | NA |
| GSM2236019 | male | ＞＝64 | T3 | N2 | NA | NA | Dead | NA |
| GSM387889 | male | ＞＝64 | NA | NA | NA | IV | Dead | mixed |
| GSM387968 | female | ＞＝64 | NA | NA | NA | III | Dead | indeterminate |
| GSM387941 | female | ＞＝64 | NA | NA | NA | I | Dead | indeterminate |
| GSM387802 | male | ＞＝64 | NA | NA | NA | I | Alive | mixed |
| GSM1379319 | NA | ＞＝64 | T3 | N1 | M0 | III | Dead | NA |
| GSM2235629 | male | ＞＝64 | T4 | N1 | NA | NA | Dead | NA |
| GSM2235559 | male | ＞＝64 | T3 | N2 | NA | NA | Dead | NA |
| GSM2235576 | female | ＞＝64 | T3 | N2 | NA | NA | Dead | NA |
| GSM2235611 | female | ＞＝64 | T4 | N2 | NA | NA | Dead | NA |
| GSM387822 | male | ＞＝64 | NA | NA | NA | III | Alive | indeterminate |
| GSM387863 | male | ＞＝64 | NA | NA | NA | I | Alive | indeterminate |
| GSM387984 | female | ＞＝64 | NA | NA | NA | III | Alive | indeterminate |
| GSM1379270 | NA | ＞＝64 | T3 | N3 | M0 | IV | Alive | NA |
| GSM2235797 | female | ＞＝64 | T3 | N0 | NA | NA | Alive | NA |
| GSM2235569 | male | ＞＝64 | T4 | N1 | NA | NA | Alive | NA |
| GSM2235601 | male | ＞＝64 | T4 | N2 | NA | NA | Alive | NA |
| GSM2235866 | female | ＞＝64 | T4 | N2 | NA | NA | Alive | NA |
| GSM2235826 | male | ＞＝64 | T3 | N2 | NA | NA | Dead | NA |
| GSM858126 | male | ＞＝64 | NA | NA | NA | III | Dead | indeterminate |
| GSM387986 | male | ＞＝64 | NA | NA | NA | I | Alive | mixed |
| GSM387875 | male | ＞＝64 | NA | NA | NA | I | Alive | indeterminate |
| GSM387973 | male | ＞＝64 | NA | NA | NA | III | Alive | indeterminate |
| GSM387892 | female | ＞＝64 | NA | NA | NA | IV | Dead | indeterminate |
| GSM387859 | male | ＞＝64 | NA | NA | NA | III | Dead | diffuse |
| GSM858108 | female | ＞＝64 | NA | NA | NA | III | Dead | indeterminate |
| GSM2236027 | female | ＞＝64 | T4 | N1 | NA | NA | Alive | NA |
| GSM2235784 | male | ＞＝64 | T2 | N0 | NA | NA | Dead | NA |
| GSM2235776 | male | ＞＝64 | T4 | N0 | NA | NA | Dead | NA |
| GSM2235748 | male | ＞＝64 | T4 | N2 | NA | NA | Dead | NA |
| GSM387847 | female | ＞＝64 | NA | NA | NA | I | Dead | indeterminate |
| GSM387921 | male | ＞＝64 | NA | NA | NA | IV | Alive | indeterminate |
| GSM387896 | male | ＞＝64 | NA | NA | NA | III | Dead | indeterminate |
| GSM387856 | male | ＞＝64 | NA | NA | NA | III | Dead | indeterminate |
| GSM387916 | male | ＞＝64 | NA | NA | NA | I | Dead | indeterminate |
| GSM2235851 | male | ＞＝64 | T1 | N0 | NA | NA | Dead | NA |
| GSM2235887 | male | ＞＝64 | T3 | N2 | NA | NA | Dead | NA |
| GSM2235562 | female | ＞＝64 | T4 | N2 | NA | NA | Dead | NA |
| GSM2235831 | male | ＞＝64 | T4 | N3 | NA | NA | Dead | NA |
| GSM387874 | female | ＞＝64 | NA | NA | NA | IV | Dead | indeterminate |
| GSM387837 | male | ＞＝64 | NA | NA | NA | III | Dead | diffuse |
| GSM858104 | male | ＞＝64 | NA | NA | NA | II | Alive | diffuse |
| GSM858137 | female | ＞＝64 | NA | NA | NA | IV | Alive | diffuse |
| GSM387809 | female | ＞＝64 | NA | NA | NA | III | Alive | diffuse |
| GSM858106 | female | ＞＝64 | NA | NA | NA | III | Dead | indeterminate |
| GSM387942 | female | ＞＝64 | NA | NA | NA | III | Alive | diffuse |
| GSM2235793 | male | ＞＝64 | T3 | N2 | NA | NA | Dead | NA |
| GSM858093 | female | ＞＝64 | NA | NA | NA | II | Dead | indeterminate |
| GSM2235841 | female | ＞＝64 | T4 | N1 | NA | NA | Dead | NA |
| GSM387882 | female | ＞＝64 | NA | NA | NA | III | Dead | indeterminate |
| GSM858131 | male | ＞＝64 | NA | NA | NA | II | Alive | diffuse |
| GSM387894 | female | ＞＝64 | NA | NA | NA | I | Alive | indeterminate |
| GSM858097 | male | ＞＝64 | NA | NA | NA | I | Alive | indeterminate |
| GSM387846 | female | ＞＝64 | NA | NA | NA | III | Dead | indeterminate |
| GSM2235571 | female | ＞＝64 | T3 | N1 | NA | NA | Alive | NA |
| GSM2235770 | male | ＞＝64 | T3 | N1 | NA | NA | Dead | NA |
| GSM2236090 | male | ＞＝64 | T4 | N0 | NA | NA | Dead | NA |
| GSM387884 | female | ＞＝64 | NA | NA | NA | II | Dead | diffuse |
| GSM387895 | male | ＞＝64 | NA | NA | NA | III | Alive | indeterminate |
| GSM387944 | male | ＞＝64 | NA | NA | NA | III | Alive | indeterminate |
| GSM387803 | female | ＞＝64 | NA | NA | NA | IV | Alive | indeterminate |
| GSM387903 | male | ＞＝64 | NA | NA | NA | III | Dead | indeterminate |
| GSM1379272 | NA | NA | T3 | N2 | M0 | III | Dead | NA |
| GSM1379330 | NA | NA | T3 | N3 | M0 | IV | Dead | NA |

**Supplementary Table 2： Immune cells and hypoxia-related gene sets**

| **Name** | **description** | **Gene** |
| --- | --- | --- |
| CD56bright.natural.killer.cell | Innate | ABAT C11orf75 C5orf15 CDHR1 DCAF12 DYNLL1 GPR137B HCP5 HDGFRP2 KRT86 MLST8 ELMOD3 ENTPD5 FAM119A FAM179A CLIC2 COX7A2L CREB3L4 CSF1 CSNK2A2 CSTA CSTB CTPS CTSD FST GATA2 GMPR HDC HEY1 HOXA1 HS2ST1 HS3ST1 BCL11B CDH3 MYL6B NAA16 ClQA ClQB CYP27B1 EIF3M |
| Type.17.T.helper.cell | Adaptive | IL17A IL17RA C2CD4A C2CD4B CA2 CCDC65 CEACAM3 IL17C IL17F IL17RC IL17RE IL23A ILDR1 LONRF3 SH2D6 TNIP2 ABCA1 ABCB1 ADAMTS12 ANK1 ANKRD22 B3GALT2 CAMTA1 CCR9 CD40 GPR44 IFT80 |
| Activated.CD4.T.cell | Adaptive | AIM2 BIRC3 BRIP1 CCL20 CCL4 CCL5 CCNB1 CCR7 DUSP2 ESCO2 ETS1 EXO1 EXOC6 IARS ITK KIF11 KNTC1 NUF2 PRC1 PSAT1 RGS1 RTKN2 SAMSN1 SELL TRAT1 |
| Activated.dendritic.cell | Innate | ABCD1 C1QC CAPG CCL3L3 CD207 CD302 ATP5B ATP5L ATP6V1A BCL2L1 C1QB SNURF SPCS3 CCNA1 CEACAM8 NOS2 SRA1 TNFRSF6B TREM1 TREML1 RHOA SLC25A37 TNFSF14 TREML4 VNN2 XPO6 CLEC4C TNFAIP2 UBD ACTR3 RAB1A SLA HLA-DQA2 SIGLEC5 SLAMF9 |
| CD56dim.natural.killer.cell | Innate | CYP27A1 DDX55 DYRK2 RPL37A NOTCH3 AKR7A3 GPRC5C GRIN1 HLA-E PORCN PSMC4 UPP1 IL21R KIR2DS1 KIR2DS2 KIR2DS5 |
| Neutrophil | Innate | CREB5 CDA CHST15 S100A12 APOBEC3A CASP5 MMP25 HAL C1orf183 FFAR2 MAK CXCR1 STEAP4 MGAM BTNL8 CXCR2 TNFRSF10C VNN3 |
| Monocyte | Innate | ASGR2 CFP ASGR1 CD1D UPK3A ACTG1 ANXA5 ATP6V1B2 CFL1 DAZAP2 CTBS EMR4P HIVEP2 MARCKSL1 MBP MMP15 PNPLA6 TMBIM6 PQBP1 TEX264 IKZF1 |
| Eosinophil | Innate | GIPR KRT18P50 LRMP FOSB RRP12 GPR183 NR4A3 ST3GAL6 DEPDC5 PDE6C PKD2L2 GPR65 IL5RA P2RY14 DACH1 DAPK2 EMR3 |
| Activated.CD8.T.cell | Adaptive | ADRM1 AHSA1 C1GALT1C1 CCT6B CD37 CD3D CD3E CD3G CD69 CD8A CETN3 CSE1L GEMIN6 GNLY GPT2 GZMA GZMH GZMK IL2RB LCK MPZL1 NKG7 PIK3IP1 PTRH2 TIMM13 ZAP70 |
| Activated.B.cell | Adaptive | ADAM28 CD180 CD79B BLK CD19 MS4A1 TNFRSF17 IGHM GNG7 MICAL3 SPIB HLA-DOB IGKC PNOC FCRL2 BACH2 CR2 TCL1A AKNA ARHGAP25 CCL21 CD27 CD38 CLEC17A CLEC9A CLECL1 |
| Immature..B.cell | Adaptive | CD22 CYBB FAM129C FCRL1 FCRL3 FCRL5 FCRLA HDAC9 HLA-DQA1 HVCN1 KIAA0226 NCF1 NCF1B P2RY10 SP100 TXNIP STAP1 TAGAP ZCCHC2 |
| Type.2.T.helper.cell | Adaptive | ASB2 CSRP2 DAPK1 DLC1 DNAJC12 DUSP6 GNAI1 LAMP3 NRP2 OSBPL1A PDE4B PHLDA1 PLA2G4A RAB27B RBMS3 RNF125 TMPRSS3 GATA3 BIRC5 CDC25C CDC7 CENPF CXCR6 DHFR EVI5 GSTA4 HELLS IL26 LAIR2 |
| Gamma.delta.T.cell | Adaptive | ACP5 AQP9 BTN3A2 C1orf54 CARD8 CCL18 CD209 CD33 CD36 CDK5 IL10RB KLRF1 LGALS1 MAPK7 KLHL7 KRT80 LAMC1 LCORL LMNB1 MEIS3P1 MPL FABP1 FABP5 FADD MFAP3L MINPP1 RPS24 RPS7 RPS9 DBNL CCL13 |
| Immature.dendritic.cell | Innate | ACADM AHCYL1 ALDH1A2 ALDH3A2 ALDH9A1 ALOX15 AMT ARL1 ATIC ATP5A1 CAPZA1 LILRA5 RDX RRAGD TACSTD2 INPP5F RAB38 PLAU CSF3R SLC18A2 AMPD2 CLTB C1orf162 |
| Mast.cell | Innate | ADAMTS3 CPA3 CMA1 CTSG ARHGAP15 CPM FCN1 FTL HSPA6 ITGA9 RNASE3 S100A4 SIGLEC8 SLC6A4 PTGS2 EGR3 PILRA |
| Plasmacytoid.dendritic.cell | Innate | CBX6 DAB2 DDX17 HIGD1A IDH3A IL3RA MAGED1 NUCB2 OFD1 OGT PDIA4 SERTAD2 SIRPA TMED2 ENG FCAR IGF1 ITGA2B GABARAP GPX1 KRT23 PROK2 RALB RETNLB RNF141 SEC14L1 SEPX1 EMP3 CD300LF ABTB1 KLHL21 PHRF1 |
| Type.1.T.helper.cell | Adaptive | CD70 TBX21 ADAM8 AHCYL2 ALCAM B3GALNT1 BBS12 BST1 CD151 CD47 CD48 CD52 CD53 CD59 CD6 CD68 CD7 CD96 CFHR3 CHRM3 CLEC7A COL23A1 COL4A4 COL5A3 DAB1 DLEU7 DOC2B EMP1 F12 FURIN GAB3 GATM GFPT2 GPR25 GREM2 HAVCR1 HSD11B1 HUNK IGF2 RCSD1 RYR1 SAV1 SELE SELP SH3KBP1 SIT1 SLC35B3 SIGLEC10 SKAP1 THUMPD2 TIGIT ZEB2 ENC1 FAM134B FBXO30 FCGR2C STAC LTC4S MAN1B1 MDH1 MMD RGS16 IL12A P2RX5 CD97 ITGB4 ICAM3 METRNL TNFRSF1A IRF1 HTR2B CALD1 MOCOS TRAF3IP2 TLR8 TRAF1 DUSP14 |
| T.follicular.helper.cell | Adaptive | B3GAT1 CDK5R1 PDCD1 BCL6 CD200 CD83 CD84 FGF2 GPR18 CEBPA CECR1 CLEC10A CLEC4A CSF1R CTSS DMN DPP4 LRRC32 MC5R MICA NCAM1 NCR2 NRP1 PDCD1LG2 PDCD6 PRDX1 RAE1 RAET1E SIGLEC7 SIGLEC9 TYRO3 CHST12 CLIC3 IVNS1ABP KIR2DL2 LGMN |
| Regulatory.T.cell | Adaptive | CCL3L1 CD72 CLEC5A FOXP3 ITGA4 L1CAM LIPA LRP1 LRRC42 MARCO MMP12 MNDA MRC1 MS4A6A PELO PLEK PRSS23 PTGIR ST8SIA4 STAB1 |
| Macrophage | Innate | AIF1 CCL1 CCL14 CCL23 CCL26 CD300LB CNR1 CNR2 EIF1 EIF4A1 FPR1 FPR2 FRAT2 GPR27 GPR77 RNASE2 MS4A2 BASP1 IGSF6 HK3 VNN1 FES NPL FZD2 FAM198B HNMT SLC15A3 CD4 TXNDC3 FRMD4A CRYBB1 HRH1 WNT5B |
| MDSC | Innate | CCR2 CD14 CD2 CD86 CXCR4 FCGR2A FCGR2B FCGR3A FERMT3 GPSM3 IL18BP IL4R ITGAL ITGAM PARVG PSAP PTGER2 PTGES2 S100A8 S100A9 |
| Natural.killer.cell | Innate | AKT3 AXL BST2 CDH2 CRTAM CSF2RA CTSZ CXCL1 CYTH1 DAXX DGKH DLL4 DPYD ERBB3 F11R FAM27A FAM49A FASLG FCGR1A FN1 FSTL1 FUCA1 GBP3 GLS2 GRB2 LST1 BCL2 CDC5L FGF18 FUT5 FZR1 GAGE2 IGFBP5 KANK2 LDB3 |
| Natural.killer.T.cell | Innate | BTN2A2 CD101 CD109 CNPY3 CNPY4 CREB1 CRTC2 CRTC3 CSF2 KLRC1 FUT4 ICAM2 IL32 LAMP2 LILRB5 KLRG1 HSPA4 HSPB6 ISM2 ITIH2 KDM4C KIR2DS4 KIRREL3 SDCBP NFATC2IP MICB KIR2DL1 KIR2DL3 KIR3DL1 KIR3DL2 NCR1 FOSL1 TSLP SLC7A7 SPP1 TREM2 UBASH3A YBX2 CCDC88A CLEC1A THBD PDPN VCAM1 EMR1 |
| FARDIN.HYPOXIA.9 | Genes in the hypoxia signature, based on analysis of nine neuroblastoma cell lines in hypoxia and normal oxygen conditions. | AK4 ALDOC BNIP3 DDIT4 FAM162A PDK1 VEGFA |
| QI.HYPOXIA | Genes up-regulated by hypoxia in TRAMP-C cells (prostatic cancer). | ABCB6 ACAP1 ACAT2 ACER2 ACSS2 ADIPOR2 ADM AK4 ALDOA ALDOC AMPD3 ATG9B BCL2L11 BHLHE40 BNIP3 CA9 CAPN5 CASP6 CCNG2 CD109 CDC42EP2 CDHR1 CDKN1A CIART COL12A1 CRYAB CTNS CYP2S1 CYP51A1 DDIT4 DIXDC1 DUSP1 DYRK1B EFNA1 EGLN1 EGLN3 ELMO1 ESPN FAM117B FFAR4 FOXO3 FZD1 GALR2 GBE1 GCH1 GLS2 GPI GPR146 GPR35 GRHPR GTF2E2 HDAC5 HES6 HIGD1A HK1 HK2 HMGCL HMOX1 HOMER1 HPSE IER3 IGFBP3 IL13RA1 INSIG1 IRX2 ITGA11 ITPK1 JMJD6 KCNB1 KCNK2 KDELR3 KDM4B KIF21B KRT19 LOX LPIN1 LSS MAP3K1 MBOAT2 ME2 MPP2 MT1X MVD MXI1 NAA80 NDRG1 NDRG2 NRN1 NSDHL OSTF1 P4HA1 P4HA2 PAFAH1B3 PCYT1B PDK1 PDXP PFKL PFKP PGAM1 PGF PGM1 PKP2 PLEKHA2 PLOD1 PLOD2 PPP1R3B PPP1R3C RASL12 REEP1 RNF126 RNF19A RORA SAP30 SCD SERTAD1 SH3YL1 SIAH2 SLC19A2 SLC2A1 SLC41A2 SOX9 SPG21 SQLE STC1 TNFSF9 TRERF1 TRIOBP VEGFA VHL VLDLR WHAMM ZBTB8B |
| KIM.HYPOXIA | Genes up-regulated in normal fibroblasts under hypoxia conditions. | ALDOC AMPD3 ANGPTL4 BACH1 BNIP3L ENO2 F3 GYS1 JUN LDHA PDLIM4 PFKP PLIN2 SLC2A1 TPI1 VEGFA |
| WACKER.HYPOXIA.TARGETS.OF.VHL | Genes down-regulated by VHL [GeneID=7428] and re-expressed under hypoxia conditions in renal carcinoma cells. | ADM CA9 CCND1 CP ENO2 HK2 IGFBP3 INHBB P4HA1 PDK1 PFKP TGFA VEGFA |
| ELVIDGE.HYPOXIA.BY.DMOG.UP | Genes up-regulated in MCF7 cells (breast cancer) treated with hypoxia mimetic DMOG [PubChem=3080614]. | ADM ADORA2B AHNAK2 AK4 AKAP12 ALDOC ANG ANGPTL4 ARTN ASPH ATF3 ATG14 ATXN1 BHLHE40 BNIP3 BNIP3L CA9 CADM1 CAV1 CCN5 CCNG2 CD59 CEMIP CITED2 CSGALNACT1 CSRP2 CXCR4 CYB5A DAAM1 DDIT4 DPYSL4 DSC2 DST DTNA EGFR EGLN1 EGLN3 EGR1 ELF3 ENO2 ERO1A FAM13A FAM162A FOS FYN GBE1 GDF15 GJA1 GLRX GPR87 GPRC5A GYS1 HEY1 HILPDA HK2 HLA-DRB1 IGFBP3 IGFBP5 ILVBL INHA INSIG2 ISG20 ITPR1 JUN KDM3A KLF6 KLF7 KLHL24 LIMCH1 LOX LOXL2 MAFF MET MGAT5 MXI1 NAP1L1 NDRG1 NFIL3 NR3C1 OBSL1 OLFML2A OPN3 P4HA1 P4HA2 PAM PDK1 PFKFB3 PFKP PGK1 PGM1 PIM1 PLAC8 PLAUR PPFIA4 PRKCA QSOX1 RBCK1 RLF RNASE4 RRAGD S100A2 S100A4 S100A6 SAMD4A SAT1 SCNN1B SERPINE1 SFXN3 SLC2A1 SLCO4A1 SOX9 SPAG4 SPOCK1 SPRY1 SRD5A3 SRPX STBD1 STC1 STC2 TBC1D3F TGFBI TMEFF1 TMEM45A TNFAIP8 TXNIP VEGFA VEGFC VLDLR WSB1 YEATS2 YPEL1 ZNF292 ZNF395 |
| ELVIDGE.HYPOXIA.UP | Genes up-regulated in MCF7 cells (breast cancer) under hypoxia conditions. | ADGRE2 ADM ADORA2B AHNAK2 AK4 AKAP12 ALDOC ANG ANGPTL4 ANKZF1 ARTN ASPH ATF3 ATG14 ATXN1 B3GNT4 BBX BCOR BHLHE40 BNIP3 BNIP3L CA9 CADM1 CAV1 CAVIN1 CCN1 CCN5 CCNG2 CD59 CEMIP CITED2 CSGALNACT1 CSRP2 CXCR4 CYB5A CYP1B1 DAAM1 DDIT4 DDR1 DPYSL2 DPYSL4 DSC2 DST DTNA DUSP1 ECE1 EFNA3 EGFR EGLN1 EGLN3 EGR1 ELF3 ENO2 ERO1A FAM13A FAM162A FAM216A FLNB FOS FYN GADD45B GBE1 GDF15 GJA1 GLRX GPR87 GPRC5A GYS1 HCFC1R1 HEY1 HILPDA HK2 HLA-DRB1 IGFBP3 IGFBP5 ILVBL INHA INSIG2 ISG20 ITPR1 JUN KDM3A KDM4B KLF6 KLF7 KLHL24 KRT15 KRT7 LIMCH1 LOX LOXL1 LOXL2 MAFF MET MT-ND5 MXI1 NAP1L1 NDRG1 NFIL3 NOL3 NR3C1 NREP OBSL1 OLFML2A OPN3 ORAI3 P4HA1 P4HA2 PAM PDGFB PDGFRL PDK1 PFKFB3 PFKP PGAP1 PGK1 PGM1 PIM1 PLAC8 PLAUR PLIN2 PPFIA4 PRKCA PXDN QSOX1 RASA4 RBCK1 RBPJ RLF RNASE4 RRAGD S100A2 S100A4 S100A6 SAMD4A SAT1 SCARB1 SCNN1B SERPINE1 SFXN3 SH3GL3 SLC2A1 SLCO4A1 SORL1 SOX9 SPAG4 SPOCK1 SPRY1 SRD5A3 SRPX STBD1 STC1 STC2 TBC1D3F TGFBI TIPARP TMEFF1 TMEM265 TMEM45A TNFAIP8 TXNIP UPK1A VEGFA VEGFC VLDLR WSB1 YEATS2 YPEL1 ZMYND8 ZNF292 ZNF395 ZNF654 |
| HARRIS.HYPOXIA | Genes known to be induced by hypoxia | ADM AK3 ALDOA ANGPT2 APEX1 BHLHE40 BIK BNIP3 BNIP3L CA12 CA9 CCL2 CCNG2 CD99 CDKN1A CDKN1B COL5A1 CP CXCL8 DDIT3 EDN1 EDN2 ENO1 ENPEP EPAS1 EPO F3 FGF3 FLT1 FOS FTL GAPDH HDAC9 HGF HIF1A HK1 HK2 HMOX1 IGF2 IGFBP1 IGFBP2 IGFBP3 IL6 JUN L1CAM LDHA LRP8 MIF MMP13 NFKB1 P4HA1 PDGFB PFKL PFKP PGF PGK1 PKM PLAUR PRPS1 PTGS2 RP1 SAT1 SLC2A1 SLC2A3 SPP1 STC1 TAGLN TEK TF TFF3 TFRC TGFA TGFB1 TGFB3 TGM2 TH TXN VEGFA VIM XRCC5 XRCC6 |
| LEONARD.HYPOXIA | Genes up-regulated in HK-2 cells kidney tubular epithelium) under hypoxia and down-regulated on re-oxygenation. | ADORA2B AK4 ALDOA BHLHE40 BNIP3 CCNG2 CDKN1B CDKN1C DDIT4 DEPP1 DUSP1 EFNA1 F3 FOSL2 HNRNPA1 HOXA4 HOXA5 JMJD6 JUNB KDM3A MUC1 NFIL3 P4HA1 P4HA2 PDGFB PFKFB4 PFKP PGK1 PHC2 PLIN2 PPP1R3C RASGRP1 SAP30 SERPINE1 SLC16A3 SLC2A1 SLC2A3 SLC7A5 STC2 TGFA VEGFA |
| FARDIN.HYPOXIA.11 | Genes in the hypoxia signature, based on analysis of 11 neuroblastoma cell lines in hypoxia and normal oxygen conditions. | AK4 ALDOC ANGPTL4 ANKRD37 BHLHE40 BNIP3 BNIP3L BTG1 DDIT4 EGLN1 EGLN3 FAM162A FUT11 IGF1R IGFBP3 KDM3A MAPT MTFP1 MXI1 NDRG1 P4HA2 PDK1 PFKFB4 PGK1 PGM1 PLOD1 SLC2A3 TNIP1 TPI1 TXNIP VEGFA ZNF395 |
| MENSE.HYPOXIA.UP | Hypoxia response genes up-regulated in both astrocytes and HeLa cell line. | ABCB6 ADM ALDOC ANG ANGPTL4 ANKRD37 ASPH ATF3 BHLHE40 BHLHE41 BNIP3 BNIP3L C4orf3 CDK19 CEBPB CEBPD CLK3 CLPB CTTN DIDO1 DPCD EEF1AKMT3 EGLN1 ELL2 ENO2 ERICH1 ERO1A FAM110C FAM13A FAM162A FOXD1 FUT11 GADD45A GBE1 GNA13 GOSR2 GPI GPRIN3 HCFC1R1 HILPDA HK2 INSIG1 INSIG2 JMJD6 KDM3A KDM4B KDM4C KIAA2013 KLF4 KLF7 KLHL24 LARP6 LCORL LOX MAFF MED6 MIR210 MXI1 NADSYN1 NAMPT NDRG1 NFIL3 NOL3 OSMR P4HA1 P4HA2 PDK1 PEX13 PFKFB3 PFKFB4 PGK1 PLIN2 PLOD2 PPFIA4 PPP1R15A PPP1R3C PRPSAP1 RBPJ RIOK3 RNASE4 RORA SCD SERGEF SLC2A3 SOD2 SPAG4 STARD4 STC2 STK4 TC2N THAP8 TIPARP TMEM65 TSLP VEGFA WDR54 ZBTB25 |
| MAINA.HYPOXIA.VHL.TARGETS.UP | Genes up-regulated by hypoxia in RCC4 cells (renal cell carcinoma) engineered to stably express VHL [GeneID=7428] off a plasmid vector. | CDKN1C CLDN4 F3 NREP SERPINE1 SLC16A3 |
| MANALO.HYPOXIA.UP | Genes up-regulated in response to both hypoxia and overexpression of an active form of HIF1A [GeneID=3091]. | ABCA1 ACKR3 ACVR1B ADM ADORA2A AFAP1 AK4 ALDH2 ALPK3 ANGPTL4 APOD ARL4C ATP2C1 ATXN1 AXL B3GALT4 BACE2 BCL6 BGN BHLHE40 BNIP3 BNIP3L CASK CCNG2 CD200 CDH2 CDK19 CDKN1C CELF2 CHST1 CHST15 CHSY1 CLIP2 COL18A1 COL1A2 COL4A1 COL4A2 COL5A1 COL9A1 CREB3L2 CUBN CX3CL1 CXCR4 CYP4F11 DCHS1 DDIT4 DIAPH2 DKK3 DLGAP4 DUSP6 EDN1 EGLN1 EGLN3 ENO2 ENPP1 EPOR ERO1A F8 FAM171A1 FER1L4 FILIP1L FKBP9 FNDC3B GABRP GADD45B GAS6 GBE1 GDF10 GJA5 GLCE GLS GPC1 GPNMB GRAMD1C GRK5 GYPC HES1 HIF3A HIVEP2 HLA-B HLA-E HTRA1 IDH2 IER3 IGFBP3 INHBA INHBE INSR ITM2A ITPR2 KANK3 KDM3A KLF11 LAMB1 LEPR LIMCH1 LIMS1 LOX LOXL2 LRRC32 MAFF MAGED2 MARCHF3 MAST4 MEF2A MMP2 MN1 MTHFD2L MTSS1 MXI1 MYH13 N4BP3 NAP1L1 NARF NDRG1 NEDD9 NFASC NFATC4 NINJ2 NMRK1 NOTCH4 NPAS2 NPR1 NUAK1 NYNRIN OPN3 P4HA1 P4HA2 PAM PDGFB PDZD2 PELI2 PGF PGM1 PGM3 PLCG2 PLEKHO1 PLOD1 PLOD2 PPARG PPP1R13L PTGIS PTGS1 PTPRB PTPRF PTPRR PXN RAI14 RASSF2 RBKS RGS3 RHOBTB1 RLN1 RNASE4 RPS6KA2 RRAS SEC24A SEPTIN4 SERPINE1 SHOX2 SIK1 SIRT3 SLC2A3 SLC6A8 SLCO5A1 SMAD6 SORBS2 SOX4 SPAG4 SPOCK1 SPSB1 STC1 STC2 SV2C SYNPO TAPBPL TCF7L1 TCIM TENT5A TGFBI TLE1 TMCC1 TMEM45A TNFAIP3 TNFRSF10B TNFRSF14 TNS1 TP53TG1 TPM1 TRIB2 TRIO TSGA10 TSKU TXNIP USP47 VEGFA VEGFC VLDLR VWF WASF2 ZBTB1 ZHX2 ZNF292 ZNF395 ZNF710-AS1 |
| MIZUKAMI.HYPOXIA.UP | Genes up-regulated in DLD-1 cells (colon cancer) in response to hypoxia; might not be direct targets of HIF1A [GeneID=3091]. | ADM ANG CXCL12 CXCR2 EFNA1 ENG FGF2 NOS2 PDGFA TGFA TGFB3 VEGFA |

**Supplementary Table 3: Stromal score, immune score and estimate score calculated by ESTIMATE algorithm.**

| **ID** | **HIcluster** | **StromalScore** | **ImmuneScore** | **ESTIMATEScore** |
| --- | --- | --- | --- | --- |
| GSE15459_GSM387788 | A | 869.4351982 | 1324.273482 | 2193.70868 |
| GSE15459_GSM387789 | B | 1170.871617 | 2245.136962 | 3416.008579 |
| GSE15459_GSM387790 | A | -1613.503592 | 11.78748307 | -1601.716109 |
| GSE15459_GSM387791 | C | 343.0650561 | 2861.607022 | 3204.672078 |
| GSE15459_GSM387792 | A | 261.6288901 | 798.8644775 | 1060.493368 |
| GSE15459_GSM387793 | A | 998.3640536 | 1426.979935 | 2425.343989 |
| GSE15459_GSM387794 | A | 1440.975833 | 1288.770428 | 2729.746262 |
| GSE15459_GSM387795 | A | 713.8505466 | 850.9397494 | 1564.790296 |
| GSE15459_GSM387796 | A | -1295.407014 | 740.5918653 | -554.8151482 |
| GSE15459_GSM387797 | A | -807.8573545 | 854.7192058 | 46.86185135 |
| GSE15459_GSM387798 | A | -257.1941143 | 557.8592751 | 300.6651608 |
| GSE15459_GSM387799 | B | -156.573557 | 1409.22358 | 1252.650023 |
| GSE15459_GSM387800 | A | -378.843332 | 810.3353366 | 431.4920046 |
| GSE15459_GSM387801 | A | -695.9424481 | 423.2484698 | -272.6939784 |
| GSE15459_GSM387802 | C | -208.1130323 | 2056.229318 | 1848.116286 |
| GSE15459_GSM387803 | A | -1829.482826 | 318.1678308 | -1511.314995 |
| GSE15459_GSM387804 | A | 982.499421 | 1394.088522 | 2376.587943 |
| GSE15459_GSM387805 | A | -1385.744051 | 1008.217389 | -377.5266622 |
| GSE15459_GSM387806 | C | 554.8138228 | 2542.177208 | 3096.991031 |
| GSE15459_GSM387807 | A | -257.181183 | 1016.75732 | 759.5761369 |
| GSE15459_GSM387808 | A | -454.111688 | 178.1607077 | -275.9509803 |
| GSE15459_GSM387809 | A | -360.813023 | 213.1647478 | -147.6482752 |
| GSE15459_GSM387810 | C | -200.2098587 | 1955.223159 | 1755.0133 |
| GSE15459_GSM387811 | B | 36.90223976 | 842.7608157 | 879.6630555 |
| GSE15459_GSM387812 | B | 752.9385407 | 1582.209781 | 2335.148322 |
| GSE15459_GSM387813 | A | -707.3315123 | 551.664056 | -155.6674562 |
| GSE15459_GSM387814 | C | 1682.577952 | 2761.567278 | 4444.14523 |
| GSE15459_GSM387815 | A | -548.6311537 | 1003.024108 | 454.3929542 |
| GSE15459_GSM387816 | C | 994.874098 | 2274.876502 | 3269.750601 |
| GSE15459_GSM387817 | A | -267.1472814 | 673.3602605 | 406.2129791 |
| GSE15459_GSM387818 | A | -60.89921055 | 395.8397257 | 334.9405152 |
| GSE15459_GSM387819 | B | 1936.562009 | 1979.196097 | 3915.758106 |
| GSE15459_GSM387820 | B | 46.31620354 | 1453.005225 | 1499.321428 |
| GSE15459_GSM387821 | A | 520.23658 | 1231.068214 | 1751.304794 |
| GSE15459_GSM387822 | A | 264.5657936 | 662.0996922 | 926.6654858 |
| GSE15459_GSM387823 | B | 908.3277568 | 1273.838181 | 2182.165938 |
| GSE15459_GSM387824 | B | 1538.562268 | 2003.637628 | 3542.199896 |
| GSE15459_GSM387825 | C | 807.1607987 | 1675.113661 | 2482.274459 |
| GSE15459_GSM387826 | A | 1221.132493 | 1586.561062 | 2807.693555 |
| GSE15459_GSM387827 | A | 854.9796616 | 1144.70816 | 1999.687822 |
| GSE15459_GSM387828 | B | 195.6938426 | 1867.979222 | 2063.673064 |
| GSE15459_GSM387829 | C | 838.2458533 | 2116.887291 | 2955.133145 |
| GSE15459_GSM387830 | B | 876.4524515 | 1894.628004 | 2771.080456 |
| GSE15459_GSM387831 | B | -546.0465862 | 1219.063799 | 673.0172131 |
| GSE15459_GSM387832 | C | 1732.43087 | 2021.269909 | 3753.700779 |
| GSE15459_GSM387833 | A | 355.6892104 | 626.6033932 | 982.2926036 |
| GSE15459_GSM387834 | B | 1495.115816 | 1323.06937 | 2818.185186 |
| GSE15459_GSM387835 | C | 1205.997933 | 3028.73406 | 4234.731993 |
| GSE15459_GSM387836 | A | 655.2450777 | 1048.339393 | 1703.58447 |
| GSE15459_GSM387837 | A | 1010.222617 | 1034.435211 | 2044.657828 |
| GSE15459_GSM387838 | B | 1843.250439 | 1964.030053 | 3807.280491 |
| GSE15459_GSM387839 | B | -256.0702816 | 1488.33177 | 1232.261488 |
| GSE15459_GSM387840 | A | 1046.979218 | 1146.292216 | 2193.271434 |
| GSE15459_GSM387841 | B | 2175.476299 | 2630.926337 | 4806.402636 |
| GSE15459_GSM387842 | B | 398.0159024 | 1355.401003 | 1753.416906 |
| GSE15459_GSM387843 | A | -179.0828933 | 380.3911525 | 201.3082592 |
| GSE15459_GSM387844 | A | -680.6265016 | 435.248432 | -245.3780696 |
| GSE15459_GSM387845 | B | 848.8503766 | 1500.390447 | 2349.240824 |
| GSE15459_GSM387846 | B | 486.0299042 | 1514.159369 | 2000.189273 |
| GSE15459_GSM387847 | B | 1707.530362 | 1688.512743 | 3396.043104 |
| GSE15459_GSM387848 | B | 1116.860227 | 2502.906842 | 3619.767069 |
| GSE15459_GSM387849 | B | 1589.42415 | 1768.275814 | 3357.699963 |
| GSE15459_GSM387850 | B | 1987.581718 | 2599.074421 | 4586.656139 |
| GSE15459_GSM387851 | B | 1303.725195 | 1729.69318 | 3033.418376 |
| GSE15459_GSM387852 | B | 1507.163759 | 1259.717353 | 2766.881112 |
| GSE15459_GSM387853 | B | 1040.352684 | 1426.912489 | 2467.265173 |
| GSE15459_GSM387854 | A | -445.8662401 | 80.76042801 | -365.1058121 |
| GSE15459_GSM387855 | A | -695.6284647 | -322.3918009 | -1018.020266 |
| GSE15459_GSM387856 | B | 1385.753227 | 2034.268923 | 3420.022149 |
| GSE15459_GSM387857 | C | 1694.579038 | 2167.69038 | 3862.269417 |
| GSE15459_GSM387858 | B | 1421.415644 | 1787.370266 | 3208.78591 |
| GSE15459_GSM387859 | C | 2073.150629 | 3042.997519 | 5116.148148 |
| GSE15459_GSM387860 | C | 1087.245794 | 2524.899123 | 3612.144917 |
| GSE15459_GSM387861 | B | 173.2090851 | 1181.697035 | 1354.90612 |
| GSE15459_GSM387862 | B | 1795.767602 | 2127.072646 | 3922.840248 |
| GSE15459_GSM387863 | B | 1886.880767 | 2090.255342 | 3977.136109 |
| GSE15459_GSM387864 | A | 895.8077898 | 1541.704069 | 2437.511859 |
| GSE15459_GSM387865 | A | 746.3956504 | 1059.025817 | 1805.421468 |
| GSE15459_GSM387866 | B | 1895.624382 | 2241.600736 | 4137.225118 |
| GSE15459_GSM387867 | B | 280.9036219 | 1507.645777 | 1788.549399 |
| GSE15459_GSM387868 | B | 2125.962644 | 2707.077995 | 4833.040639 |
| GSE15459_GSM387869 | B | 1032.265353 | 1725.815602 | 2758.080955 |
| GSE15459_GSM387870 | B | 919.1462134 | 1668.389513 | 2587.535726 |
| GSE15459_GSM387871 | A | -12.92008375 | 1247.157694 | 1234.237611 |
| GSE15459_GSM387872 | B | 585.2633875 | 1176.895729 | 1762.159117 |
| GSE15459_GSM387873 | C | 174.7769583 | 2108.970385 | 2283.747343 |
| GSE15459_GSM387874 | B | 1228.929052 | 1624.10566 | 2853.034711 |
| GSE15459_GSM387875 | B | 1223.205937 | 1457.815889 | 2681.021826 |
| GSE15459_GSM387876 | C | 1887.436353 | 2595.437053 | 4482.873406 |
| GSE15459_GSM387877 | C | 1267.907834 | 3007.34775 | 4275.255584 |
| GSE15459_GSM387878 | A | 959.9847823 | 1045.149234 | 2005.134016 |
| GSE15459_GSM387879 | B | -105.9411647 | 1374.935717 | 1268.994553 |
| GSE15459_GSM387880 | B | 1504.656677 | 1716.795309 | 3221.451986 |
| GSE15459_GSM387881 | A | 962.2836741 | 737.0518434 | 1699.335518 |
| GSE15459_GSM387882 | B | 281.5576535 | 1380.167256 | 1661.72491 |
| GSE15459_GSM387883 | C | 194.9229219 | 1857.864214 | 2052.787136 |
| GSE15459_GSM387884 | B | -58.29443707 | 1585.243836 | 1526.949399 |
| GSE15459_GSM387885 | C | 171.7528634 | 2679.303384 | 2851.056248 |
| GSE15459_GSM387886 | B | 658.8714756 | 2118.993311 | 2777.864786 |
| GSE15459_GSM387887 | C | 1226.674104 | 2604.092259 | 3830.766363 |
| GSE15459_GSM387888 | A | 1138.814562 | 837.5952346 | 1976.409797 |
| GSE15459_GSM387889 | B | 840.5273181 | 1662.745721 | 2503.273039 |
| GSE15459_GSM387890 | A | -1154.232255 | 950.9534124 | -203.278843 |
| GSE15459_GSM387891 | C | 157.8367841 | 1839.699513 | 1997.536298 |
| GSE15459_GSM387892 | A | 804.0739642 | 551.9901044 | 1356.064069 |
| GSE15459_GSM387893 | B | 920.1851283 | 1382.651463 | 2302.836591 |
| GSE15459_GSM387894 | B | -751.0794352 | 1258.859983 | 507.7805476 |
| GSE15459_GSM387895 | B | 494.4489796 | 1857.208501 | 2351.65748 |
| GSE15459_GSM387896 | A | 186.7621285 | 646.0861729 | 832.8483014 |
| GSE15459_GSM387897 | C | 144.3682157 | 1824.708191 | 1969.076407 |
| GSE15459_GSM387898 | B | 1394.418625 | 1601.35899 | 2995.777616 |
| GSE15459_GSM387899 | A | 1492.557357 | 1199.670986 | 2692.228343 |
| GSE15459_GSM387900 | C | -303.4668414 | 1549.240398 | 1245.773557 |
| GSE15459_GSM387901 | A | -1249.358292 | -254.8230427 | -1504.181335 |
| GSE15459_GSM387902 | C | 552.0215857 | 2446.16198 | 2998.183566 |
| GSE15459_GSM387903 | A | -1442.09808 | -665.406334 | -2107.504414 |
| GSE15459_GSM387904 | A | -304.499353 | 597.8403317 | 293.3409787 |
| GSE15459_GSM387905 | B | 1781.849265 | 2287.130633 | 4068.979897 |
| GSE15459_GSM387906 | B | 1105.601447 | 1180.635723 | 2286.23717 |
| GSE15459_GSM387907 | A | -354.8223644 | 1024.49089 | 669.6685253 |
| GSE15459_GSM387908 | B | 761.8635128 | 985.1376149 | 1747.001128 |
| GSE15459_GSM387909 | A | 1205.896819 | 1302.972232 | 2508.869051 |
| GSE15459_GSM387910 | A | 319.7922864 | 1140.289985 | 1460.082272 |
| GSE15459_GSM387911 | C | 1600.384649 | 2596.271811 | 4196.65646 |
| GSE15459_GSM387912 | B | 343.3572196 | 1303.838612 | 1647.195832 |
| GSE15459_GSM387913 | A | -817.5257262 | 574.1261412 | -243.399585 |
| GSE15459_GSM387914 | B | 386.669173 | 1545.914871 | 1932.584044 |
| GSE15459_GSM387915 | C | 1165.675789 | 2211.059684 | 3376.735473 |
| GSE15459_GSM387916 | A | -681.2671374 | 723.0214106 | 41.75427316 |
| GSE15459_GSM387917 | A | -379.7660898 | 739.0449515 | 359.2788617 |
| GSE15459_GSM387918 | B | 66.77983389 | 1010.828842 | 1077.608676 |
| GSE15459_GSM387919 | B | 1015.827837 | 2131.54154 | 3147.369377 |
| GSE15459_GSM387920 | A | -380.3801456 | 635.1499134 | 254.7697678 |
| GSE15459_GSM387921 | C | 106.9177636 | 1775.215917 | 1882.133681 |
| GSE15459_GSM387922 | A | -423.876415 | 1240.082362 | 816.2059472 |
| GSE15459_GSM387923 | A | 414.8564268 | 815.3915581 | 1230.247985 |
| GSE15459_GSM387924 | C | 484.6600977 | 1607.688643 | 2092.348741 |
| GSE15459_GSM387925 | C | 1356.801823 | 1937.408293 | 3294.210116 |
| GSE15459_GSM387926 | A | -306.2189091 | 927.6483096 | 621.4294005 |
| GSE15459_GSM387927 | B | 839.4598636 | 1954.090265 | 2793.550129 |
| GSE15459_GSM387928 | C | 218.256673 | 2610.519864 | 2828.776537 |
| GSE15459_GSM387929 | B | 1443.90704 | 1397.409003 | 2841.316042 |
| GSE15459_GSM387930 | C | -71.22250903 | 2003.42146 | 1932.198951 |
| GSE15459_GSM387931 | B | 1856.347685 | 2100.859598 | 3957.207283 |
| GSE15459_GSM387932 | A | -648.0517129 | 578.8414754 | -69.21023751 |
| GSE15459_GSM387933 | B | 1186.96968 | 1782.935492 | 2969.905173 |
| GSE15459_GSM387934 | C | 790.521517 | 2529.044725 | 3319.566242 |
| GSE15459_GSM387935 | B | -146.4641646 | 1442.674851 | 1296.210687 |
| GSE15459_GSM387936 | B | 2078.999742 | 1865.947394 | 3944.947136 |
| GSE15459_GSM387937 | A | 901.8695552 | 1132.827478 | 2034.697033 |
| GSE15459_GSM387938 | A | 49.9880994 | 1035.097683 | 1085.085782 |
| GSE15459_GSM387939 | C | -777.9645533 | 1370.136992 | 592.172439 |
| GSE15459_GSM387940 | B | 1211.400985 | 1980.172733 | 3191.573718 |
| GSE15459_GSM387941 | B | 27.99366469 | 1966.190825 | 1994.18449 |
| GSE15459_GSM387942 | A | 473.5010351 | 318.5126071 | 792.0136423 |
| GSE15459_GSM387943 | A | 553.5283308 | 1174.359148 | 1727.887479 |
| GSE15459_GSM387944 | C | -438.7549647 | 1526.144776 | 1087.389811 |
| GSE15459_GSM387945 | B | 825.0715464 | 1206.379447 | 2031.450994 |
| GSE15459_GSM387946 | C | 1046.63705 | 2592.201965 | 3638.839016 |
| GSE15459_GSM387947 | B | 1207.787403 | 2237.655265 | 3445.442668 |
| GSE15459_GSM387948 | B | 385.1439097 | 1481.403353 | 1866.547263 |
| GSE15459_GSM387949 | A | -900.2509925 | 878.4536778 | -21.79731473 |
| GSE15459_GSM387950 | C | 1073.953133 | 2585.475602 | 3659.428735 |
| GSE15459_GSM387951 | A | -1043.801271 | 725.144282 | -318.6569886 |
| GSE15459_GSM387952 | A | -243.3585755 | 1117.951861 | 874.593285 |
| GSE15459_GSM387953 | C | 1114.530939 | 2737.45821 | 3851.989148 |
| GSE15459_GSM387954 | A | 1176.617319 | 1519.741163 | 2696.358482 |
| GSE15459_GSM387955 | A | 318.0780823 | 738.9392601 | 1057.017342 |
| GSE15459_GSM387956 | A | 683.894681 | 1332.984168 | 2016.878849 |
| GSE15459_GSM387957 | A | 579.4812751 | 1024.684478 | 1604.165753 |
| GSE15459_GSM387958 | A | -1973.59096 | -344.0534994 | -2317.64446 |
| GSE15459_GSM387959 | C | 1002.856455 | 2819.678775 | 3822.53523 |
| GSE15459_GSM387960 | A | 1460.183338 | 745.0227465 | 2205.206085 |
| GSE15459_GSM387961 | C | 1083.708353 | 2131.514085 | 3215.222438 |
| GSE15459_GSM387962 | B | 1149.419202 | 1857.687126 | 3007.106328 |
| GSE15459_GSM387963 | C | 540.5314671 | 2125.044579 | 2665.576046 |
| GSE15459_GSM387964 | B | -197.6283005 | 1438.140011 | 1240.511711 |
| GSE15459_GSM387965 | B | 535.6975144 | 1865.894536 | 2401.59205 |
| GSE15459_GSM387966 | A | -1432.126396 | -207.4754814 | -1639.601877 |
| GSE15459_GSM387967 | C | 1095.005599 | 2173.439217 | 3268.444816 |
| GSE15459_GSM387968 | A | 111.8153951 | 845.3746663 | 957.1900614 |
| GSE15459_GSM387969 | C | 877.3326659 | 3589.422462 | 4466.755127 |
| GSE15459_GSM387970 | B | 839.3206239 | 1318.745667 | 2158.066291 |
| GSE15459_GSM387971 | B | -52.57508546 | 1634.683581 | 1582.108495 |
| GSE15459_GSM387972 | B | 1001.897342 | 1478.082136 | 2479.979477 |
| GSE15459_GSM387973 | B | 570.5855011 | 1357.735565 | 1928.321066 |
| GSE15459_GSM387974 | C | 555.0897377 | 2793.749174 | 3348.838912 |
| GSE15459_GSM387975 | B | 281.0895782 | 1440.059142 | 1721.148721 |
| GSE15459_GSM387976 | A | 540.7416924 | 1132.543865 | 1673.285558 |
| GSE15459_GSM387977 | C | 448.605649 | 1879.038524 | 2327.644173 |
| GSE15459_GSM387978 | A | 1155.878042 | 1330.146752 | 2486.024794 |
| GSE15459_GSM387979 | A | 268.7000805 | 811.8536503 | 1080.553731 |
| GSE15459_GSM387980 | A | 609.7835416 | 536.8426571 | 1146.626199 |
| GSE15459_GSM387981 | A | 192.9447246 | 603.4725436 | 796.4172682 |
| GSE15459_GSM387982 | A | 112.1643214 | 1622.256897 | 1734.421218 |
| GSE15459_GSM387983 | B | 1324.917183 | 1567.730114 | 2892.647297 |
| GSE15459_GSM387984 | A | -560.9022048 | 71.88455504 | -489.0176498 |
| GSE15459_GSM387985 | A | 9.503037169 | 841.0543123 | 850.5573494 |
| GSE15459_GSM387986 | A | -591.1492213 | 253.2384047 | -337.9108166 |
| GSE15459_GSM387987 | A | -461.9051576 | 7.042496638 | -454.8626609 |
| GSE34942_GSM858082 | C | 704.568052 | 2805.356538 | 3509.92459 |
| GSE34942_GSM858083 | B | -267.19297 | 1855.458436 | 1588.265466 |
| GSE34942_GSM858084 | B | 167.9084161 | 1396.793631 | 1564.702047 |
| GSE34942_GSM858085 | A | 80.21058489 | 1403.883255 | 1484.093839 |
| GSE34942_GSM858086 | B | 361.4225882 | 606.0316736 | 967.4542618 |
| GSE34942_GSM858087 | B | 1078.337465 | 1666.802545 | 2745.14001 |
| GSE34942_GSM858088 | C | 662.5608221 | 2173.862784 | 2836.423606 |
| GSE34942_GSM858089 | A | 1744.562142 | 1044.664378 | 2789.226521 |
| GSE34942_GSM858090 | A | 985.8287978 | 1125.378258 | 2111.207056 |
| GSE34942_GSM858091 | B | 1842.528757 | 2503.75657 | 4346.285326 |
| GSE34942_GSM858092 | A | 555.8515514 | 1028.076653 | 1583.928205 |
| GSE34942_GSM858093 | C | -611.8505416 | 1931.531181 | 1319.68064 |
| GSE34942_GSM858094 | C | 786.3179811 | 1887.371576 | 2673.689557 |
| GSE34942_GSM858095 | A | -519.061715 | 877.9420271 | 358.880312 |
| GSE34942_GSM858096 | C | 2407.248444 | 2490.509788 | 4897.758232 |
| GSE34942_GSM858097 | A | 289.9323664 | 1475.642 | 1765.574366 |
| GSE34942_GSM858098 | A | -328.7268328 | 13.20508109 | -315.5217518 |
| GSE34942_GSM858099 | A | -124.1453309 | 1040.1173 | 915.9719687 |
| GSE34942_GSM858100 | B | 1340.081459 | 1388.195532 | 2728.276992 |
| GSE34942_GSM858101 | A | -40.44101684 | 882.9850381 | 842.5440213 |
| GSE34942_GSM858102 | B | -561.9623703 | 1119.446813 | 557.4844424 |
| GSE34942_GSM858103 | A | -1430.31236 | 575.6917578 | -854.6206019 |
| GSE34942_GSM858104 | A | 1688.566249 | 1034.24489 | 2722.811139 |
| GSE34942_GSM858105 | C | 927.1010401 | 2774.681214 | 3701.782254 |
| GSE34942_GSM858106 | B | 1399.687426 | 1781.824341 | 3181.511767 |
| GSE34942_GSM858107 | C | 1715.599638 | 2883.405439 | 4599.005077 |
| GSE34942_GSM858108 | A | -1573.647087 | -487.8750187 | -2061.522106 |
| GSE34942_GSM858109 | A | -359.0955396 | 1044.85019 | 685.7546508 |
| GSE34942_GSM858110 | A | 85.74695755 | 1184.114245 | 1269.861202 |
| GSE34942_GSM858111 | C | 1218.125349 | 2698.188425 | 3916.313774 |
| GSE34942_GSM858112 | A | -188.4693464 | 760.1306748 | 571.6613284 |
| GSE34942_GSM858113 | C | -242.0787184 | 1562.252687 | 1320.173969 |
| GSE34942_GSM858114 | C | 1551.054338 | 2319.001166 | 3870.055503 |
| GSE34942_GSM858115 | C | -33.83815324 | 1465.748923 | 1431.91077 |
| GSE34942_GSM858116 | A | -1001.458541 | 229.9907339 | -771.4678073 |
| GSE34942_GSM858117 | B | 1089.757955 | 1799.935743 | 2889.693698 |
| GSE34942_GSM858118 | B | 1524.947802 | 2018.112443 | 3543.060245 |
| GSE34942_GSM858119 | A | 1029.925998 | 54.15996003 | 1084.085958 |
| GSE34942_GSM858120 | A | 91.23879265 | 553.0398041 | 644.2785968 |
| GSE34942_GSM858121 | B | 1531.008672 | 1322.719899 | 2853.728571 |
| GSE34942_GSM858122 | A | -698.4110737 | 1205.911008 | 507.4999339 |
| GSE34942_GSM858123 | A | 390.0778383 | 762.3688103 | 1152.446649 |
| GSE34942_GSM858124 | A | 301.9062433 | 543.7981892 | 845.7044324 |
| GSE34942_GSM858125 | C | 633.4078988 | 2436.63907 | 3070.046969 |
| GSE34942_GSM858126 | A | -753.4046531 | 1070.786644 | 317.3819908 |
| GSE34942_GSM858127 | C | 642.0681079 | 1833.248567 | 2475.316675 |
| GSE34942_GSM858128 | A | -154.533175 | 1348.391184 | 1193.858009 |
| GSE34942_GSM858129 | A | 427.4877159 | 1182.52911 | 1610.016826 |
| GSE34942_GSM858130 | A | 877.0659869 | 797.459664 | 1674.525651 |
| GSE34942_GSM858131 | C | 1189.806093 | 2315.070603 | 3504.876696 |
| GSE34942_GSM858132 | C | -205.4888181 | 2049.77017 | 1844.281352 |
| GSE34942_GSM858133 | A | -133.9897704 | -470.4743972 | -604.4641676 |
| GSE34942_GSM858134 | C | 1036.785618 | 3576.264889 | 4613.050507 |
| GSE34942_GSM858135 | B | 1674.043219 | 2172.521952 | 3846.565171 |
| GSE34942_GSM858136 | B | 1918.027334 | 2427.465657 | 4345.492991 |
| GSE34942_GSM858137 | B | 854.7353415 | 564.3090165 | 1419.044358 |
| GSE57303_GSM1379261 | B | 122.4700926 | 1334.539446 | 1457.009539 |
| GSE57303_GSM1379262 | C | -521.5463449 | 1782.454492 | 1260.908147 |
| GSE57303_GSM1379263 | C | -65.47694227 | 1410.561203 | 1345.084261 |
| GSE57303_GSM1379264 | C | -241.3185888 | 2034.367467 | 1793.048878 |
| GSE57303_GSM1379265 | C | 1538.681106 | 2348.375666 | 3887.056772 |
| GSE57303_GSM1379266 | B | 580.2094544 | 2109.839211 | 2690.048666 |
| GSE57303_GSM1379267 | B | 2063.313798 | 1672.15435 | 3735.468148 |
| GSE57303_GSM1379268 | B | -196.7974468 | 1430.660236 | 1233.862789 |
| GSE57303_GSM1379269 | B | 2174.848712 | 2235.422365 | 4410.271077 |
| GSE57303_GSM1379270 | A | -381.1878825 | 638.6864796 | 257.4985972 |
| GSE57303_GSM1379271 | C | 988.1328375 | 2434.939369 | 3423.072206 |
| GSE57303_GSM1379272 | B | 407.9362398 | 1585.244244 | 1993.180484 |
| GSE57303_GSM1379273 | A | -505.3937079 | 358.5216406 | -146.8720673 |
| GSE57303_GSM1379274 | A | -1080.485997 | 1208.213448 | 127.7274506 |
| GSE57303_GSM1379275 | B | 530.5192413 | 765.801844 | 1296.321085 |
| GSE57303_GSM1379276 | C | 695.7019589 | 1965.251263 | 2660.953222 |
| GSE57303_GSM1379277 | B | 663.5803685 | 1889.051808 | 2552.632176 |
| GSE57303_GSM1379278 | A | -1232.234407 | 272.7288461 | -959.5055613 |
| GSE57303_GSM1379279 | B | 956.8556073 | 1262.74048 | 2219.596087 |
| GSE57303_GSM1379280 | A | 51.23364841 | 495.6499087 | 546.8835571 |
| GSE57303_GSM1379281 | B | 1619.305968 | 2470.490981 | 4089.796949 |
| GSE57303_GSM1379282 | A | -88.31306508 | 1080.88679 | 992.5737249 |
| GSE57303_GSM1379283 | B | 2338.305506 | 1963.864346 | 4302.169853 |
| GSE57303_GSM1379284 | A | 404.3255296 | 522.905214 | 927.2307436 |
| GSE57303_GSM1379285 | C | 346.4030167 | 1630.82263 | 1977.225647 |
| GSE57303_GSM1379286 | A | -242.2621434 | 835.2959891 | 593.0338457 |
| GSE57303_GSM1379287 | B | 1090.765493 | 1765.688322 | 2856.453815 |
| GSE57303_GSM1379288 | A | 213.727854 | 805.2883822 | 1019.016236 |
| GSE57303_GSM1379289 | B | -273.2216317 | 165.4510254 | -107.7706063 |
| GSE57303_GSM1379290 | B | 2159.315583 | 1991.560552 | 4150.876135 |
| GSE57303_GSM1379291 | B | 414.5307457 | 2093.332716 | 2507.863462 |
| GSE57303_GSM1379292 | A | -507.7099129 | 64.87781594 | -442.8320969 |
| GSE57303_GSM1379293 | A | -924.2113479 | 347.9254139 | -576.285934 |
| GSE57303_GSM1379294 | B | 642.5562481 | 1467.083545 | 2109.639794 |
| GSE57303_GSM1379295 | B | 1388.605965 | 2163.050031 | 3551.655996 |
| GSE57303_GSM1379296 | A | 198.7594948 | 765.80108 | 964.5605748 |
| GSE57303_GSM1379297 | A | 499.6989586 | 1412.886112 | 1912.58507 |
| GSE57303_GSM1379298 | B | 2084.569081 | 1877.129918 | 3961.698999 |
| GSE57303_GSM1379299 | A | -95.12875126 | 552.235121 | 457.1063697 |
| GSE57303_GSM1379300 | B | 1596.733707 | 969.4562049 | 2566.189912 |
| GSE57303_GSM1379301 | C | 205.3897071 | 2736.694679 | 2942.084386 |
| GSE57303_GSM1379302 | A | -477.3289785 | -19.75907352 | -497.088052 |
| GSE57303_GSM1379303 | B | 866.107435 | 1963.327627 | 2829.435062 |
| GSE57303_GSM1379304 | B | 1107.596098 | 1112.934231 | 2220.53033 |
| GSE57303_GSM1379305 | A | -26.86008225 | 920.2107145 | 893.3506323 |
| GSE57303_GSM1379306 | B | -146.8572525 | 1286.660141 | 1139.802889 |
| GSE57303_GSM1379307 | C | 2032.034225 | 3837.622556 | 5869.656781 |
| GSE57303_GSM1379308 | C | 75.76402979 | 2058.608854 | 2134.372884 |
| GSE57303_GSM1379309 | A | -382.5963403 | 905.9603861 | 523.3640458 |
| GSE57303_GSM1379310 | C | 1410.685914 | 1837.651512 | 3248.337426 |
| GSE57303_GSM1379311 | A | -274.3350027 | 437.8214869 | 163.4864843 |
| GSE57303_GSM1379312 | B | 932.3184218 | 1401.284422 | 2333.602844 |
| GSE57303_GSM1379313 | A | -318.3389499 | 1092.494605 | 774.1556546 |
| GSE57303_GSM1379314 | B | 290.7173531 | 656.6219235 | 947.3392766 |
| GSE57303_GSM1379315 | B | 455.8541599 | 2357.437617 | 2813.291777 |
| GSE57303_GSM1379316 | A | 135.5409145 | 476.1189045 | 611.659819 |
| GSE57303_GSM1379317 | B | 744.0075489 | 2321.730043 | 3065.737592 |
| GSE57303_GSM1379318 | C | 401.1508564 | 2432.432464 | 2833.58332 |
| GSE57303_GSM1379319 | A | 360.9665504 | 1036.449972 | 1397.416523 |
| GSE57303_GSM1379320 | B | 1144.032167 | 2285.840993 | 3429.87316 |
| GSE57303_GSM1379321 | A | -1367.949604 | -45.20889483 | -1413.158499 |
| GSE57303_GSM1379322 | C | 636.2059686 | 2037.389564 | 2673.595532 |
| GSE57303_GSM1379323 | A | -509.0647848 | 585.5137866 | 76.44900182 |
| GSE57303_GSM1379324 | A | 138.951754 | 971.1108031 | 1110.062557 |
| GSE57303_GSM1379325 | B | 412.9691436 | 1487.040643 | 1900.009787 |
| GSE57303_GSM1379326 | A | 318.2587849 | 1230.257947 | 1548.516732 |
| GSE57303_GSM1379327 | A | 54.07564417 | 1028.886903 | 1082.962547 |
| GSE57303_GSM1379328 | C | 1961.471784 | 3532.428682 | 5493.900466 |
| GSE57303_GSM1379329 | B | 1050.922049 | 1010.227014 | 2061.149063 |
| GSE57303_GSM1379330 | C | 1880.070727 | 2516.445161 | 4396.515888 |
| GSE62254_GSM1523727 | A | -1230.201144 | 238.3619893 | -991.8391543 |
| GSE62254_GSM1523728 | B | 574.8228034 | 1494.364382 | 2069.187185 |
| GSE62254_GSM1523729 | A | 317.2486483 | 968.1532033 | 1285.401852 |
| GSE62254_GSM1523744 | A | 148.9292877 | 677.6470661 | 826.5763538 |
| GSE62254_GSM1523745 | B | 738.3919242 | 1150.246504 | 1888.638429 |
| GSE62254_GSM1523746 | A | -331.1283449 | 684.0142566 | 352.8859117 |
| GSE62254_GSM1523747 | A | -421.9412761 | 674.457065 | 252.5157889 |
| GSE62254_GSM1523748 | A | 668.6981507 | 1401.811941 | 2070.510091 |
| GSE62254_GSM1523765 | A | -110.1151202 | 447.2506588 | 337.1355386 |
| GSE62254_GSM1523768 | B | 1327.753145 | 1832.840022 | 3160.593166 |
| GSE62254_GSM1523769 | C | 1492.885754 | 2629.416015 | 4122.301769 |
| GSE62254_GSM1523770 | B | 265.1687116 | 1931.74335 | 2196.912062 |
| GSE62254_GSM1523771 | B | 2404.83146 | 2406.158693 | 4810.990153 |
| GSE62254_GSM1523772 | B | 1660.695882 | 1528.119558 | 3188.81544 |
| GSE62254_GSM1523773 | B | 2126.832591 | 2048.260857 | 4175.093448 |
| GSE62254_GSM1523774 | C | 1104.258578 | 1627.488924 | 2731.747502 |
| GSE62254_GSM1523775 | A | -265.0155221 | 845.8240945 | 580.8085724 |
| GSE62254_GSM1523776 | A | 180.7559886 | 1732.676961 | 1913.43295 |
| GSE62254_GSM1523777 | A | -29.66874331 | 136.3527362 | 106.6839929 |
| GSE62254_GSM1523778 | B | 1294.205553 | 1935.814577 | 3230.02013 |
| GSE62254_GSM1523779 | C | 10.54053959 | 1649.25955 | 1659.80009 |
| GSE62254_GSM1523780 | B | 807.0153993 | 1165.341608 | 1972.357007 |
| GSE62254_GSM1523781 | A | -774.6675097 | -497.5877524 | -1272.255262 |
| GSE62254_GSM1523782 | B | 186.6172785 | 881.4000265 | 1068.017305 |
| GSE62254_GSM1523783 | C | 307.4616576 | 2416.320429 | 2723.782087 |
| GSE62254_GSM1523784 | C | 730.5506596 | 1969.559743 | 2700.110403 |
| GSE62254_GSM1523785 | B | 634.4044088 | 1541.278953 | 2175.683362 |
| GSE62254_GSM1523786 | C | 1125.621814 | 2423.602328 | 3549.224142 |
| GSE62254_GSM1523787 | A | -1422.206239 | 21.02907521 | -1401.177164 |
| GSE62254_GSM1523788 | C | 1993.337971 | 2163.244551 | 4156.582522 |
| GSE62254_GSM1523789 | A | 1368.297642 | 1256.64159 | 2624.939231 |
| GSE62254_GSM1523790 | B | 1107.250844 | 2346.392634 | 3453.643478 |
| GSE62254_GSM1523791 | B | 769.2962287 | 1795.099227 | 2564.395455 |
| GSE62254_GSM1523792 | A | -393.9261318 | 1004.813869 | 610.8877372 |
| GSE62254_GSM1523793 | B | 155.9352969 | 1638.720663 | 1794.65596 |
| GSE62254_GSM1523794 | B | 908.1476728 | 2138.275947 | 3046.423619 |
| GSE62254_GSM1523795 | A | 346.7128402 | 1025.906812 | 1372.619652 |
| GSE62254_GSM1523796 | B | 2589.649409 | 2640.349629 | 5229.999039 |
| GSE62254_GSM1523797 | A | -720.3599591 | 1045.787575 | 325.4276161 |
| GSE62254_GSM1523798 | C | 1666.948749 | 3634.367108 | 5301.315857 |
| GSE62254_GSM1523799 | B | 357.2449855 | 1651.982697 | 2009.227683 |
| GSE62254_GSM1523800 | C | -32.37912213 | 2125.869042 | 2093.489919 |
| GSE62254_GSM1523801 | B | -144.0270852 | 1646.686538 | 1502.659453 |
| GSE62254_GSM1523802 | A | -29.97480061 | 1407.660154 | 1377.685353 |
| GSE62254_GSM1523803 | A | 132.8131241 | 1210.315125 | 1343.128249 |
| GSE62254_GSM1523804 | C | 1204.716752 | 2146.719994 | 3351.436746 |
| GSE62254_GSM1523805 | C | 1506.974826 | 2217.023752 | 3723.998578 |
| GSE62254_GSM1523806 | B | 205.2620123 | 1650.571743 | 1855.833755 |
| GSE62254_GSM1523807 | B | 943.7588523 | 2025.92727 | 2969.686123 |
| GSE62254_GSM1523808 | C | 1465.685099 | 2296.606096 | 3762.291195 |
| GSE62254_GSM1523809 | A | 165.1755735 | 1681.320095 | 1846.495668 |
| GSE62254_GSM1523810 | C | 1003.925099 | 2770.333988 | 3774.259087 |
| GSE62254_GSM1523811 | C | 488.1783069 | 2219.138539 | 2707.316846 |
| GSE62254_GSM1523812 | C | 1561.650396 | 2598.113666 | 4159.764062 |
| GSE62254_GSM1523813 | A | 931.4678781 | 697.585699 | 1629.053577 |
| GSE62254_GSM1523814 | A | 107.2500702 | 1220.768673 | 1328.018744 |
| GSE62254_GSM1523815 | A | 468.2180655 | 907.0448472 | 1375.262913 |
| GSE62254_GSM1523816 | A | -816.9371287 | 575.8649488 | -241.0721799 |
| GSE62254_GSM1523817 | A | -58.7307443 | -10.97491694 | -69.70566124 |
| GSE62254_GSM1523818 | A | -486.3847057 | 1377.198452 | 890.8137467 |
| GSE62254_GSM1523819 | A | -539.553964 | 134.6600049 | -404.893959 |
| GSE62254_GSM1523820 | B | -641.0500944 | 1090.137148 | 449.0870532 |
| GSE62254_GSM1523821 | A | -303.7877753 | 1462.445812 | 1158.658037 |
| GSE62254_GSM1523822 | B | 1284.605826 | 2459.085261 | 3743.691087 |
| GSE62254_GSM1523823 | B | 491.4543249 | 2084.632814 | 2576.087139 |
| GSE62254_GSM1523824 | B | 322.2267601 | 1259.875862 | 1582.102622 |
| GSE62254_GSM1523825 | A | -349.2188516 | -530.1711661 | -879.3900177 |
| GSE62254_GSM1523826 | C | 746.2950236 | 1995.968043 | 2742.263067 |
| GSE62254_GSM1523827 | C | 1266.041267 | 2849.547489 | 4115.588756 |
| GSE62254_GSM1523828 | B | 1196.283836 | 1494.62468 | 2690.908516 |
| GSE62254_GSM1523829 | A | -12.0240195 | 783.8301151 | 771.8060956 |
| GSE62254_GSM1523830 | C | -14.18090389 | 1934.424087 | 1920.243183 |
| GSE62254_GSM1523831 | A | -530.2568998 | 90.54878284 | -439.708117 |
| GSE62254_GSM1523832 | B | 707.6620759 | 1582.3922 | 2290.054276 |
| GSE62254_GSM1523833 | A | -221.1041155 | 824.9519968 | 603.8478812 |
| GSE62254_GSM1523834 | C | 1862.641489 | 3040.182662 | 4902.82415 |
| GSE62254_GSM1523835 | A | 1096.672798 | 637.1747464 | 1733.847545 |
| GSE62254_GSM1523836 | B | 1004.4021 | 2349.259022 | 3353.661122 |
| GSE62254_GSM1523837 | A | -468.6329089 | 106.2127456 | -362.4201633 |
| GSE62254_GSM1523838 | C | 833.5915448 | 2118.813746 | 2952.405291 |
| GSE62254_GSM1523839 | B | 1278.81466 | 2037.073417 | 3315.888077 |
| GSE62254_GSM1523840 | A | -382.2705293 | 783.0231136 | 400.7525844 |
| GSE62254_GSM1523841 | A | 661.5775605 | 1442.401906 | 2103.979467 |
| GSE62254_GSM1523842 | C | 368.319508 | 1629.209285 | 1997.528793 |
| GSE62254_GSM1523843 | C | 1016.154313 | 1758.974587 | 2775.1289 |
| GSE62254_GSM1523844 | A | 1075.953839 | 446.4388045 | 1522.392644 |
| GSE62254_GSM1523845 | B | 1225.468809 | 2063.296973 | 3288.765781 |
| GSE62254_GSM1523846 | C | 1495.451357 | 2233.165206 | 3728.616563 |
| GSE62254_GSM1523847 | B | 35.04612575 | 1333.88464 | 1368.930766 |
| GSE62254_GSM1523848 | C | 2007.907267 | 3489.555393 | 5497.46266 |
| GSE62254_GSM1523849 | B | 1930.840911 | 1827.014186 | 3757.855098 |
| GSE62254_GSM1523850 | B | 1562.045163 | 1692.275257 | 3254.32042 |
| GSE62254_GSM1523851 | B | 151.2243089 | 1653.851474 | 1805.075783 |
| GSE62254_GSM1523852 | C | 333.9318481 | 2055.443379 | 2389.375227 |
| GSE62254_GSM1523853 | A | -96.99099637 | 914.9112309 | 817.9202346 |
| GSE62254_GSM1523854 | C | 919.636638 | 2148.682154 | 3068.318792 |
| GSE62254_GSM1523855 | A | -869.8843705 | 407.8399905 | -462.04438 |
| GSE62254_GSM1523856 | B | 670.078977 | 1127.089835 | 1797.168812 |
| GSE62254_GSM1523857 | A | 1277.959783 | 990.0864291 | 2268.046212 |
| GSE62254_GSM1523858 | A | 1965.124247 | 839.0960126 | 2804.220259 |
| GSE62254_GSM1523859 | B | 106.1798788 | 997.5840348 | 1103.763914 |
| GSE62254_GSM1523860 | B | 532.2982236 | 1915.381823 | 2447.680046 |
| GSE62254_GSM1523861 | B | 183.6922638 | 1777.206245 | 1960.898509 |
| GSE62254_GSM1523862 | C | 1703.613649 | 1941.837941 | 3645.45159 |
| GSE62254_GSM1523863 | B | 189.018409 | 2410.178655 | 2599.197064 |
| GSE62254_GSM1523864 | A | -227.5540029 | 836.3534485 | 608.7994456 |
| GSE62254_GSM1523865 | A | 463.0883129 | 894.2648846 | 1357.353198 |
| GSE62254_GSM1523866 | C | 1902.044384 | 2368.1779 | 4270.222284 |
| GSE62254_GSM1523867 | B | 46.91924844 | 1448.917165 | 1495.836413 |
| GSE62254_GSM1523868 | B | 1061.52938 | 2748.312801 | 3809.842181 |
| GSE62254_GSM1523869 | B | 250.492599 | 1549.394924 | 1799.887523 |
| GSE62254_GSM1523870 | A | -274.2589944 | 1212.759025 | 938.5000304 |
| GSE62254_GSM1523871 | B | 201.3452112 | 1312.377577 | 1513.722788 |
| GSE62254_GSM1523872 | B | 1539.639604 | 2431.045755 | 3970.685358 |
| GSE62254_GSM1523873 | C | 583.862641 | 2884.003536 | 3467.866177 |
| GSE62254_GSM1523874 | B | 862.350443 | 1440.822542 | 2303.172985 |
| GSE62254_GSM1523875 | A | -810.9782867 | -73.55427198 | -884.5325586 |
| GSE62254_GSM1523876 | B | -307.1290498 | 1402.977163 | 1095.848113 |
| GSE62254_GSM1523877 | A | -853.5711767 | -251.4998281 | -1105.071005 |
| GSE62254_GSM1523878 | C | 510.7177525 | 2355.191405 | 2865.909157 |
| GSE62254_GSM1523879 | A | -179.6323326 | 1173.76002 | 994.127687 |
| GSE62254_GSM1523880 | C | -29.52226648 | 1908.636021 | 1879.113755 |
| GSE62254_GSM1523881 | A | -544.844048 | 609.517968 | 64.67391997 |
| GSE62254_GSM1523882 | A | -929.8070598 | 1448.340618 | 518.5335585 |
| GSE62254_GSM1523883 | A | -369.8152705 | 1673.369472 | 1303.554201 |
| GSE62254_GSM1523884 | B | 1102.510795 | 1872.125314 | 2974.636109 |
| GSE62254_GSM1523885 | B | 18.4673477 | 2093.883255 | 2112.350603 |
| GSE62254_GSM1523886 | B | 2130.207123 | 2543.461793 | 4673.668916 |
| GSE62254_GSM1523887 | B | 696.7043734 | 2018.165587 | 2714.86996 |
| GSE62254_GSM1523888 | C | 702.6600502 | 2780.225741 | 3482.885792 |
| GSE62254_GSM1523889 | A | -1058.994645 | 284.613486 | -774.3811593 |
| GSE62254_GSM1523890 | C | 399.5605612 | 1643.90489 | 2043.465451 |
| GSE62254_GSM1523891 | B | 1800.784285 | 2243.950816 | 4044.735101 |
| GSE62254_GSM1523892 | C | 727.6306727 | 2023.517773 | 2751.148445 |
| GSE62254_GSM1523893 | A | -388.3747768 | 827.5663752 | 439.1915984 |
| GSE62254_GSM1523894 | A | -362.5268994 | 545.7006164 | 183.173717 |
| GSE62254_GSM1523895 | A | -837.8276062 | 747.1312047 | -90.69640151 |
| GSE62254_GSM1523896 | C | 868.1124229 | 2469.469577 | 3337.582 |
| GSE62254_GSM1523897 | A | -1167.884166 | 61.03098718 | -1106.853179 |
| GSE62254_GSM1523898 | A | -371.8696295 | 731.3164259 | 359.4467965 |
| GSE62254_GSM1523899 | A | -523.1054373 | 1036.02685 | 512.9214122 |
| GSE62254_GSM1523901 | B | 278.0652373 | 1778.783252 | 2056.84849 |
| GSE62254_GSM1523903 | A | 129.6609388 | 274.1635129 | 403.8244517 |
| GSE62254_GSM1523904 | B | 449.7161462 | 1706.120862 | 2155.837008 |
| GSE62254_GSM1523905 | A | 232.154875 | 1336.493024 | 1568.647899 |
| GSE62254_GSM1523906 | C | 1231.676595 | 2965.121797 | 4196.798392 |
| GSE62254_GSM1523908 | B | 977.1968206 | 2060.149129 | 3037.345949 |
| GSE62254_GSM1523909 | B | 379.3635686 | 2185.506996 | 2564.870565 |
| GSE62254_GSM1523910 | B | -290.3549684 | 1805.530107 | 1515.175138 |
| GSE62254_GSM1523911 | A | -419.8388409 | 1028.987589 | 609.1487485 |
| GSE62254_GSM1523918 | B | 1587.598096 | 909.4718543 | 2497.069951 |
| GSE62254_GSM1523919 | C | 534.9899249 | 1862.764849 | 2397.754773 |
| GSE62254_GSM1523920 | C | 556.7349114 | 1878.595777 | 2435.330689 |
| GSE62254_GSM1523921 | B | 451.437446 | 1512.191487 | 1963.628933 |
| GSE62254_GSM1523922 | B | 600.9030365 | 1583.827943 | 2184.730979 |
| GSE62254_GSM1523923 | B | -177.9157133 | 1173.125299 | 995.2095856 |
| GSE62254_GSM1523924 | C | 1021.822327 | 1738.994375 | 2760.816702 |
| GSE62254_GSM1523925 | A | -71.3975144 | 1027.271654 | 955.8741396 |
| GSE62254_GSM1523926 | A | -1067.635894 | 245.1866432 | -822.4492504 |
| GSE62254_GSM1523927 | B | 657.3761356 | 1313.194457 | 1970.570593 |
| GSE62254_GSM1523928 | A | -231.3564702 | 713.8568211 | 482.5003508 |
| GSE62254_GSM1523929 | C | 86.72231576 | 1970.990788 | 2057.713104 |
| GSE62254_GSM1523930 | B | 752.3351289 | 1087.059168 | 1839.394297 |
| GSE62254_GSM1523931 | C | 630.9469593 | 3096.023168 | 3726.970128 |
| GSE62254_GSM1523932 | A | -767.8470399 | 737.3847191 | -30.46232078 |
| GSE62254_GSM1523933 | B | -16.05461391 | 1499.755507 | 1483.700893 |
| GSE62254_GSM1523934 | A | -188.2496476 | 408.1194909 | 219.8698433 |
| GSE62254_GSM1523935 | B | 2306.708266 | 2468.78372 | 4775.491986 |
| GSE62254_GSM1523936 | C | 1219.403019 | 1931.4919 | 3150.894919 |
| GSE62254_GSM1523937 | B | 606.2654583 | 2429.071969 | 3035.337428 |
| GSE62254_GSM1523938 | B | 2173.612293 | 1379.426401 | 3553.038694 |
| GSE62254_GSM1523939 | C | 2198.563203 | 1908.941226 | 4107.504429 |
| GSE62254_GSM1523940 | A | -453.3682584 | 166.5379964 | -286.830262 |
| GSE62254_GSM1523941 | C | 608.1862374 | 2251.585879 | 2859.772117 |
| GSE62254_GSM1523942 | A | -62.20378026 | 994.295613 | 932.0918327 |
| GSE62254_GSM1523943 | B | 62.28833217 | 1430.743636 | 1493.031968 |
| GSE62254_GSM1523944 | C | 360.8138389 | 2598.840344 | 2959.654183 |
| GSE62254_GSM1523945 | B | 1765.154507 | 2109.772245 | 3874.926751 |
| GSE62254_GSM1523946 | B | -108.3516015 | 1530.350817 | 1421.999216 |
| GSE62254_GSM1523947 | A | -426.276935 | 1308.884071 | 882.607136 |
| GSE62254_GSM1523948 | B | 1350.135407 | 1418.746399 | 2768.881806 |
| GSE62254_GSM1523949 | B | 1771.509163 | 1946.028739 | 3717.537902 |
| GSE62254_GSM1523950 | A | -1632.607902 | 87.7081005 | -1544.899801 |
| GSE62254_GSM1523951 | C | 1003.83416 | 2956.244612 | 3960.078772 |
| GSE62254_GSM1523952 | C | 685.8710352 | 2145.68947 | 2831.560505 |
| GSE62254_GSM1523953 | A | -1306.79315 | -775.2442008 | -2082.037351 |
| GSE62254_GSM1523954 | A | -1368.747772 | -24.38311043 | -1393.130883 |
| GSE62254_GSM1523955 | A | 266.6350043 | 1086.387205 | 1353.02221 |
| GSE62254_GSM1523956 | A | -130.1701646 | 408.593595 | 278.4234304 |
| GSE62254_GSM1523957 | A | -873.5956603 | -335.4352467 | -1209.030907 |
| GSE62254_GSM1523958 | C | 1121.658953 | 2688.593115 | 3810.252069 |
| GSE62254_GSM1523959 | A | -875.1944507 | 217.8207906 | -657.3736601 |
| GSE62254_GSM1523960 | A | -492.1322712 | -492.4442036 | -984.5764748 |
| GSE62254_GSM1523961 | A | -680.1476499 | 39.58186883 | -640.5657811 |
| GSE62254_GSM1523962 | C | 1860.218337 | 1852.596857 | 3712.815194 |
| GSE62254_GSM1523963 | A | -33.35390592 | 1267.736329 | 1234.382424 |
| GSE62254_GSM1523964 | A | -464.0913863 | 351.6144854 | -112.4769009 |
| GSE62254_GSM1523965 | B | 1590.660593 | 2472.591017 | 4063.25161 |
| GSE62254_GSM1523966 | C | 19.62152421 | 1263.874376 | 1283.495901 |
| GSE62254_GSM1523967 | C | 178.5896667 | 2042.558391 | 2221.148057 |
| GSE62254_GSM1523968 | A | 1984.05901 | 1151.068365 | 3135.127375 |
| GSE62254_GSM1523969 | A | 1159.196096 | 1120.640666 | 2279.836762 |
| GSE62254_GSM1523970 | A | -697.6330997 | -615.144085 | -1312.777185 |
| GSE62254_GSM1523971 | C | 1458.482123 | 1882.521353 | 3341.003476 |
| GSE62254_GSM1523972 | A | -271.7387347 | 984.9727459 | 713.2340112 |
| GSE62254_GSM1523973 | A | 236.121228 | 1063.60494 | 1299.726168 |
| GSE62254_GSM1523974 | A | -976.9365028 | 151.3308259 | -825.6056769 |
| GSE62254_GSM1523975 | C | 1991.355214 | 3167.579723 | 5158.934937 |
| GSE62254_GSM1523976 | A | -247.0677167 | 668.8340261 | 421.7663094 |
| GSE62254_GSM1523977 | A | -419.3312711 | -343.4322129 | -762.763484 |
| GSE62254_GSM1523978 | B | -273.6291415 | 1459.248336 | 1185.619194 |
| GSE62254_GSM1523979 | B | 289.6616125 | 1461.290943 | 1750.952556 |
| GSE62254_GSM1523980 | C | 1494.706563 | 2784.634434 | 4279.340997 |
| GSE62254_GSM1523981 | B | 2333.018032 | 2594.078718 | 4927.09675 |
| GSE62254_GSM1523982 | B | 2717.684772 | 3012.524472 | 5730.209244 |
| GSE62254_GSM1523983 | A | 411.6235108 | 1181.635548 | 1593.259059 |
| GSE62254_GSM1523984 | A | -3.202650757 | -251.051413 | -254.2540637 |
| GSE62254_GSM1523985 | C | 644.3847428 | 1919.712714 | 2564.097457 |
| GSE62254_GSM1523986 | C | 1161.784513 | 2797.504113 | 3959.288626 |
| GSE62254_GSM1523987 | C | 306.1279691 | 2044.760103 | 2350.888072 |
| GSE62254_GSM1523988 | A | 2067.284436 | 1902.394219 | 3969.678655 |
| GSE62254_GSM1523989 | B | 1530.565413 | 2075.973773 | 3606.539186 |
| GSE62254_GSM1523990 | A | 1204.320349 | 542.2491782 | 1746.569527 |
| GSE62254_GSM1523991 | A | 722.1054518 | 488.2726844 | 1210.378136 |
| GSE62254_GSM1523992 | A | -45.83065503 | 398.2484716 | 352.4178166 |
| GSE62254_GSM1523993 | C | 674.1416251 | 2247.313587 | 2921.455212 |
| GSE62254_GSM1523994 | B | 390.9697571 | 1597.292345 | 1988.262102 |
| GSE62254_GSM1523995 | A | -310.9058801 | 189.8689624 | -121.0369177 |
| GSE62254_GSM1523996 | A | 684.5338673 | 1153.825812 | 1838.359679 |
| GSE62254_GSM1523997 | A | -179.0755886 | 643.6811936 | 464.605605 |
| GSE62254_GSM1523998 | A | -960.9887207 | 2.746864987 | -958.2418557 |
| GSE62254_GSM1523999 | A | -855.3173485 | -108.4207541 | -963.7381026 |
| GSE62254_GSM1524000 | C | 1113.439547 | 1991.013349 | 3104.452896 |
| GSE62254_GSM1524001 | A | -333.4248081 | 824.360738 | 490.9359298 |
| GSE62254_GSM1524002 | C | 116.7306361 | 2862.274702 | 2979.005339 |
| GSE62254_GSM1524003 | A | -883.3638275 | 407.9778251 | -475.3860024 |
| GSE62254_GSM1524004 | B | 107.3815128 | 1636.144057 | 1743.52557 |
| GSE62254_GSM1524005 | A | -443.8888049 | 812.9548791 | 369.0660742 |
| GSE62254_GSM1524006 | C | 2517.308979 | 2039.02378 | 4556.332758 |
| GSE62254_GSM1524007 | C | 552.6605732 | 1616.584112 | 2169.244685 |
| GSE62254_GSM1524008 | B | -363.9595355 | 1229.784841 | 865.8253056 |
| GSE62254_GSM1524009 | B | 1516.393755 | 1697.659694 | 3214.053449 |
| GSE62254_GSM1524010 | C | 1609.008631 | 2258.462479 | 3867.47111 |
| GSE62254_GSM1524011 | A | -989.5919823 | 30.71013852 | -958.8818438 |
| GSE62254_GSM1524012 | B | -212.4662943 | 1685.315981 | 1472.849687 |
| GSE62254_GSM1524013 | B | -21.57852193 | 1189.911885 | 1168.333363 |
| GSE62254_GSM1524014 | A | -370.6304651 | -40.6989416 | -411.3294067 |
| GSE62254_GSM1524015 | A | -562.8390525 | 148.9515073 | -413.8875452 |
| GSE62254_GSM1524016 | C | 376.6240683 | 2326.883856 | 2703.507924 |
| GSE62254_GSM1524017 | A | 79.64230682 | 1478.721543 | 1558.36385 |
| GSE62254_GSM1524018 | A | -438.6928342 | 1196.494542 | 757.8017082 |
| GSE62254_GSM1524019 | B | 562.698742 | 1994.119873 | 2556.818615 |
| GSE62254_GSM1524020 | B | 198.6078062 | 1459.837026 | 1658.444833 |
| GSE62254_GSM1524021 | B | 1025.199732 | 1998.416573 | 3023.616304 |
| GSE62254_GSM1524022 | C | 1773.70221 | 2062.933717 | 3836.635928 |
| GSE62254_GSM1524023 | A | -203.6061545 | 932.8908214 | 729.2846668 |
| GSE62254_GSM1524024 | A | 707.5689364 | 1071.745471 | 1779.314408 |
| GSE62254_GSM1524025 | B | 741.141006 | 1810.425207 | 2551.566213 |
| GSE62254_GSM1524026 | B | 1652.653077 | 1553.721859 | 3206.374936 |
| GSE62254_GSM1524027 | A | 217.9413674 | 1164.64514 | 1382.586507 |
| GSE62254_GSM1524028 | A | -334.7960441 | 922.4392834 | 587.6432394 |
| GSE62254_GSM1524029 | A | 1522.526868 | 1452.479026 | 2975.005895 |
| GSE62254_GSM1524030 | C | 1937.828225 | 1508.945985 | 3446.77421 |
| GSE62254_GSM1524031 | A | -206.0371913 | 799.9987314 | 593.9615402 |
| GSE62254_GSM1524032 | B | 613.147071 | 1242.101996 | 1855.249067 |
| GSE62254_GSM1524033 | C | 395.9489124 | 2422.511321 | 2818.460233 |
| GSE62254_GSM1524034 | C | 711.8262257 | 2107.78179 | 2819.608015 |
| GSE62254_GSM1524035 | C | 2091.743822 | 2160.722056 | 4252.465877 |
| GSE62254_GSM1524036 | A | 420.4060517 | 453.292878 | 873.6989297 |
| GSE62254_GSM1524037 | B | 1473.099895 | 1592.678436 | 3065.77833 |
| GSE62254_GSM1524038 | B | 856.93576 | 2671.325014 | 3528.260774 |
| GSE62254_GSM1524039 | B | 2088.55014 | 2587.536781 | 4676.086921 |
| GSE62254_GSM1524040 | C | 462.6753901 | 2210.832901 | 2673.508292 |
| GSE62254_GSM1524041 | B | 784.4038837 | 1421.030805 | 2205.434689 |
| GSE62254_GSM1524042 | B | 540.6136675 | 2167.41063 | 2708.024297 |
| GSE62254_GSM1524043 | C | 926.9542908 | 2584.096113 | 3511.050403 |
| GSE62254_GSM1524044 | B | 1092.415163 | 1448.279957 | 2540.695121 |
| GSE62254_GSM1524045 | A | -537.6741189 | 206.2330357 | -331.4410831 |
| GSE62254_GSM1524046 | C | 1356.765313 | 1964.740902 | 3321.506215 |
| GSE62254_GSM1524047 | B | -63.63733142 | 1427.411114 | 1363.773783 |
| GSE62254_GSM1524048 | B | 1376.218344 | 1476.821995 | 2853.040339 |
| GSE62254_GSM1524049 | B | 1423.805605 | 1411.637148 | 2835.442752 |
| GSE62254_GSM1524050 | A | -558.495347 | 215.4675274 | -343.0278196 |
| GSE62254_GSM1524051 | B | 612.0035981 | 2209.024333 | 2821.027931 |
| GSE62254_GSM1524052 | A | 951.9104173 | 462.6900563 | 1414.600474 |
| GSE62254_GSM1524053 | A | 409.6382849 | 1376.265007 | 1785.903292 |
| GSE62254_GSM1524054 | A | -176.0598369 | 687.6301846 | 511.5703476 |
| GSE62254_GSM1524055 | B | 983.1005883 | 1196.86057 | 2179.961159 |
| GSE62254_GSM1524056 | B | -294.0934137 | 1280.71097 | 986.6175566 |
| GSE62254_GSM1524057 | A | 1900.519192 | 956.6979465 | 2857.217139 |
| GSE62254_GSM1524058 | C | 1806.12416 | 3012.166776 | 4818.290936 |
| GSE62254_GSM1524059 | B | 2100.776904 | 2893.003161 | 4993.780065 |
| GSE62254_GSM1524060 | A | -660.9820672 | 287.9576512 | -373.0244161 |
| GSE62254_GSM1524061 | A | -965.1335884 | 116.9713548 | -848.1622336 |
| GSE62254_GSM1524062 | C | 1758.595193 | 1503.667752 | 3262.262945 |
| GSE62254_GSM1524068 | A | -414.0920156 | 830.123696 | 416.0316805 |
| GSE62254_GSM1524069 | A | -871.4324316 | 596.1755994 | -275.2568323 |
| GSE62254_GSM1524070 | A | -448.6097633 | 410.4213786 | -38.18838471 |
| GSE62254_GSM1524071 | A | -178.5898889 | 848.3117972 | 669.7219083 |
| GSE62254_GSM1524072 | A | 479.1768212 | 1535.293913 | 2014.470734 |
| GSE84437_GSM2235556 | A | -51.38036981 | 349.9350441 | 298.5546743 |
| GSE84437_GSM2235557 | A | 1276.409574 | 1179.711815 | 2456.121389 |
| GSE84437_GSM2235558 | B | 753.3451669 | 1458.692938 | 2212.038105 |
| GSE84437_GSM2235559 | C | 377.6400844 | 1573.84066 | 1951.480745 |
| GSE84437_GSM2235560 | B | 1453.27301 | 1776.867088 | 3230.140098 |
| GSE84437_GSM2235561 | C | 1262.834896 | 1625.648484 | 2888.48338 |
| GSE84437_GSM2235562 | A | -213.2142098 | 259.6765342 | 46.46232439 |
| GSE84437_GSM2235563 | A | 265.1861889 | 823.8357314 | 1089.02192 |
| GSE84437_GSM2235564 | A | -1243.61174 | -232.6698784 | -1476.281619 |
| GSE84437_GSM2235565 | A | 962.0120472 | 851.6864145 | 1813.698462 |
| GSE84437_GSM2235566 | A | 609.8333058 | 1009.78166 | 1619.614966 |
| GSE84437_GSM2235567 | A | 1121.494692 | 1157.369177 | 2278.863869 |
| GSE84437_GSM2235568 | A | -783.8373099 | -224.0040808 | -1007.841391 |
| GSE84437_GSM2235569 | A | -323.2147605 | 192.4555318 | -130.7592287 |
| GSE84437_GSM2235570 | B | 791.8312475 | 933.2433038 | 1725.074551 |
| GSE84437_GSM2235571 | B | 2.32240811 | 1056.162315 | 1058.484723 |
| GSE84437_GSM2235572 | C | 962.2924383 | 2118.401736 | 3080.694174 |
| GSE84437_GSM2235573 | C | 956.0924029 | 1960.844433 | 2916.936836 |
| GSE84437_GSM2235574 | B | 994.3463156 | 701.3479779 | 1695.694294 |
| GSE84437_GSM2235575 | A | -890.5723657 | 211.6535414 | -678.9188243 |
| GSE84437_GSM2235576 | C | 321.9907925 | 1976.302996 | 2298.293788 |
| GSE84437_GSM2235577 | B | 1679.907991 | 1784.953014 | 3464.861005 |
| GSE84437_GSM2235578 | C | 310.2626112 | 1804.270136 | 2114.532747 |
| GSE84437_GSM2235579 | B | 1441.891648 | 1917.634921 | 3359.52657 |
| GSE84437_GSM2235580 | C | 1569.310622 | 2420.681875 | 3989.992497 |
| GSE84437_GSM2235582 | B | 302.3101758 | 1125.359444 | 1427.66962 |
| GSE84437_GSM2235584 | B | 191.6455762 | 1044.358142 | 1236.003718 |
| GSE84437_GSM2235585 | C | 869.4694771 | 2325.868556 | 3195.338033 |
| GSE84437_GSM2235586 | C | 1714.256075 | 3233.187684 | 4947.443759 |
| GSE84437_GSM2235587 | B | 646.7202545 | 1450.981145 | 2097.701399 |
| GSE84437_GSM2235588 | A | 1172.539535 | 719.904436 | 1892.443971 |
| GSE84437_GSM2235589 | A | 179.2479273 | 513.3797498 | 692.6276771 |
| GSE84437_GSM2235593 | B | 26.9957683 | 1403.072692 | 1430.06846 |
| GSE84437_GSM2235595 | C | 1102.178502 | 2265.950637 | 3368.129139 |
| GSE84437_GSM2235596 | B | 409.1467027 | 1398.246475 | 1807.393178 |
| GSE84437_GSM2235597 | A | -762.3309011 | 778.1144007 | 15.78349953 |
| GSE84437_GSM2235598 | C | 1113.190467 | 2621.666015 | 3734.856482 |
| GSE84437_GSM2235599 | B | 352.8405343 | 1522.14306 | 1874.983595 |
| GSE84437_GSM2235600 | B | 1487.612873 | 1527.66901 | 3015.281883 |
| GSE84437_GSM2235601 | B | 1595.776118 | 1527.082899 | 3122.859017 |
| GSE84437_GSM2235602 | C | 1486.797886 | 2258.429397 | 3745.227283 |
| GSE84437_GSM2235603 | A | 102.8628984 | 532.0212758 | 634.8841742 |
| GSE84437_GSM2235604 | A | 450.0363761 | 1018.297348 | 1468.333724 |
| GSE84437_GSM2235605 | B | 1488.555927 | 1648.803181 | 3137.359107 |
| GSE84437_GSM2235606 | C | 1663.06608 | 2393.809707 | 4056.875786 |
| GSE84437_GSM2235607 | B | 1179.30678 | 1520.269762 | 2699.576542 |
| GSE84437_GSM2235608 | A | -620.3248703 | 590.9497897 | -29.37508053 |
| GSE84437_GSM2235609 | C | 1584.793364 | 2583.540448 | 4168.333812 |
| GSE84437_GSM2235610 | B | 1937.783517 | 1671.609383 | 3609.392899 |
| GSE84437_GSM2235611 | A | 168.945114 | 1264.586387 | 1433.531501 |
| GSE84437_GSM2235612 | B | 1385.400338 | 1448.182364 | 2833.582702 |
| GSE84437_GSM2235613 | A | -852.5761584 | 152.9353035 | -699.6408548 |
| GSE84437_GSM2235614 | C | 775.4349042 | 2114.326045 | 2889.760949 |
| GSE84437_GSM2235615 | A | 924.324374 | 837.252083 | 1761.576457 |
| GSE84437_GSM2235616 | B | 404.5273127 | 1895.06862 | 2299.595933 |
| GSE84437_GSM2235617 | A | 207.5490973 | 1169.475507 | 1377.024604 |
| GSE84437_GSM2235618 | A | -295.5915941 | 928.4858549 | 632.8942607 |
| GSE84437_GSM2235619 | A | 333.8566574 | 888.58382 | 1222.440477 |
| GSE84437_GSM2235620 | A | 89.55493772 | 1093.695965 | 1183.250903 |
| GSE84437_GSM2235621 | A | 460.4065279 | 815.1205417 | 1275.52707 |
| GSE84437_GSM2235622 | C | 1603.030844 | 1999.209293 | 3602.240137 |
| GSE84437_GSM2235623 | B | -496.2543913 | 1317.290442 | 821.0360506 |
| GSE84437_GSM2235624 | B | 140.6939937 | 1118.307327 | 1259.00132 |
| GSE84437_GSM2235625 | C | 1460.75562 | 1913.691385 | 3374.447004 |
| GSE84437_GSM2235626 | B | 2127.065104 | 2151.944551 | 4279.009656 |
| GSE84437_GSM2235627 | A | 460.7130222 | 1228.484263 | 1689.197286 |
| GSE84437_GSM2235628 | B | 2078.160031 | 1491.632771 | 3569.792802 |
| GSE84437_GSM2235629 | B | 1632.546355 | 2165.230728 | 3797.777083 |
| GSE84437_GSM2235630 | C | 1925.123212 | 1948.072029 | 3873.195241 |
| GSE84437_GSM2235631 | C | 1539.600533 | 2581.581401 | 4121.181934 |
| GSE84437_GSM2235632 | C | 951.2283654 | 2246.693247 | 3197.921613 |
| GSE84437_GSM2235633 | C | 1798.913009 | 2338.477992 | 4137.391001 |
| GSE84437_GSM2235634 | B | 743.0312013 | 1122.77145 | 1865.802651 |
| GSE84437_GSM2235635 | B | 159.4404056 | 1629.861825 | 1789.30223 |
| GSE84437_GSM2235636 | B | 1779.234767 | 1938.947506 | 3718.182272 |
| GSE84437_GSM2235637 | C | 102.5843589 | 1930.363248 | 2032.947607 |
| GSE84437_GSM2235695 | A | -828.826057 | 812.5822755 | -16.24378148 |
| GSE84437_GSM2235696 | B | 282.2285432 | 1841.902567 | 2124.13111 |
| GSE84437_GSM2235697 | A | -1116.168442 | -189.0679638 | -1305.236406 |
| GSE84437_GSM2235698 | A | -85.90334515 | 988.6550488 | 902.7517036 |
| GSE84437_GSM2235699 | A | 964.7258222 | 887.6126602 | 1852.338482 |
| GSE84437_GSM2235700 | B | 687.7736767 | 1704.610004 | 2392.38368 |
| GSE84437_GSM2235701 | A | -1050.384649 | 305.9095974 | -744.4750513 |
| GSE84437_GSM2235702 | B | 1244.9317 | 1118.286821 | 2363.218521 |
| GSE84437_GSM2235703 | C | 706.8530723 | 1510.651674 | 2217.504746 |
| GSE84437_GSM2235704 | C | 439.6547851 | 1475.582058 | 1915.236843 |
| GSE84437_GSM2235705 | B | 125.9730366 | 1222.856075 | 1348.829112 |
| GSE84437_GSM2235706 | A | 50.75955736 | 403.9027731 | 454.6623304 |
| GSE84437_GSM2235707 | B | 144.9656306 | 1402.884345 | 1547.849976 |
| GSE84437_GSM2235708 | A | -8.464565716 | 1407.402616 | 1398.938051 |
| GSE84437_GSM2235709 | A | -345.2182082 | 1024.263852 | 679.0456435 |
| GSE84437_GSM2235710 | B | 895.0363752 | 1181.727972 | 2076.764347 |
| GSE84437_GSM2235711 | A | 106.00069 | 1317.001248 | 1423.001938 |
| GSE84437_GSM2235712 | A | -1756.4968 | -507.6363995 | -2264.133199 |
| GSE84437_GSM2235713 | A | 564.2065306 | 1051.517679 | 1615.72421 |
| GSE84437_GSM2235714 | A | -1402.166624 | -27.90530804 | -1430.071932 |
| GSE84437_GSM2235715 | C | 594.8119194 | 2300.153639 | 2894.965559 |
| GSE84437_GSM2235716 | A | -130.9174789 | 37.55394895 | -93.36352996 |
| GSE84437_GSM2235717 | A | 1400.918485 | 1447.753485 | 2848.67197 |
| GSE84437_GSM2235718 | C | 217.3720751 | 1717.456501 | 1934.828576 |
| GSE84437_GSM2235719 | B | 432.386388 | 1118.972015 | 1551.358403 |
| GSE84437_GSM2235720 | A | 463.2616715 | 960.4971272 | 1423.758799 |
| GSE84437_GSM2235721 | B | 607.4575545 | 1314.652789 | 1922.110343 |
| GSE84437_GSM2235722 | B | 475.2510417 | 1826.054544 | 2301.305586 |
| GSE84437_GSM2235723 | A | -571.3559186 | -97.93587089 | -669.2917895 |
| GSE84437_GSM2235724 | C | 1192.384742 | 1932.631348 | 3125.01609 |
| GSE84437_GSM2235725 | B | 1109.763546 | 2606.428945 | 3716.192491 |
| GSE84437_GSM2235726 | C | 1685.328761 | 3300.363883 | 4985.692644 |
| GSE84437_GSM2235727 | B | 165.264767 | 1677.096137 | 1842.360904 |
| GSE84437_GSM2235728 | B | 1340.098327 | 1639.398787 | 2979.497114 |
| GSE84437_GSM2235729 | B | 1124.146112 | 2041.719708 | 3165.86582 |
| GSE84437_GSM2235730 | A | -397.478082 | 879.4538578 | 481.9757758 |
| GSE84437_GSM2235731 | A | -845.1319744 | 1283.441663 | 438.3096882 |
| GSE84437_GSM2235732 | C | 864.0521892 | 2210.204894 | 3074.257083 |
| GSE84437_GSM2235733 | B | 1007.533197 | 1498.200056 | 2505.733253 |
| GSE84437_GSM2235734 | A | 128.2302506 | 955.7048664 | 1083.935117 |
| GSE84437_GSM2235735 | B | -57.82529178 | 1838.659259 | 1780.833967 |
| GSE84437_GSM2235736 | A | -1312.904892 | -399.6972537 | -1712.602146 |
| GSE84437_GSM2235737 | C | 551.8305828 | 2265.536553 | 2817.367135 |
| GSE84437_GSM2235738 | A | -101.7529749 | 1012.732617 | 910.9796418 |
| GSE84437_GSM2235739 | A | -556.6870164 | 133.9998048 | -422.6872116 |
| GSE84437_GSM2235740 | A | -791.915098 | 1163.700435 | 371.7853373 |
| GSE84437_GSM2235741 | A | 642.894856 | 804.1643408 | 1447.059197 |
| GSE84437_GSM2235742 | B | 251.9322565 | 1459.305962 | 1711.238219 |
| GSE84437_GSM2235743 | B | 650.1095964 | 1673.218001 | 2323.327597 |
| GSE84437_GSM2235744 | A | -76.05187835 | 1112.430526 | 1036.378648 |
| GSE84437_GSM2235745 | C | 770.8597173 | 2147.824368 | 2918.684085 |
| GSE84437_GSM2235746 | B | -437.3592025 | 1341.325954 | 903.9667512 |
| GSE84437_GSM2235747 | B | 790.327257 | 1460.044434 | 2250.371691 |
| GSE84437_GSM2235748 | B | 1141.716492 | 1282.772102 | 2424.488593 |
| GSE84437_GSM2235749 | A | -1292.385386 | 138.5113447 | -1153.874042 |
| GSE84437_GSM2235750 | B | 432.8714715 | 748.6985211 | 1181.569993 |
| GSE84437_GSM2235751 | C | 151.0879004 | 2026.242604 | 2177.330504 |
| GSE84437_GSM2235752 | C | -507.682128 | 2143.642218 | 1635.96009 |
| GSE84437_GSM2235753 | C | 1001.282177 | 2127.425106 | 3128.707283 |
| GSE84437_GSM2235754 | B | 1649.051973 | 1604.174764 | 3253.226737 |
| GSE84437_GSM2235755 | B | 1254.925817 | 1501.019809 | 2755.945626 |
| GSE84437_GSM2235756 | C | 1516.964034 | 1888.983323 | 3405.947358 |
| GSE84437_GSM2235757 | B | 688.2398161 | 1217.642518 | 1905.882334 |
| GSE84437_GSM2235758 | A | -552.823119 | 683.0689576 | 130.2458386 |
| GSE84437_GSM2235759 | B | 1989.022771 | 1485.36365 | 3474.386422 |
| GSE84437_GSM2235760 | A | 586.3724482 | 655.5653761 | 1241.937824 |
| GSE84437_GSM2235761 | C | 1420.719161 | 1745.759245 | 3166.478406 |
| GSE84437_GSM2235762 | B | 230.6170579 | 1196.684924 | 1427.301982 |
| GSE84437_GSM2235763 | C | 66.06226211 | 1800.855839 | 1866.918101 |
| GSE84437_GSM2235764 | A | -1404.542057 | 790.6364667 | -613.9055908 |
| GSE84437_GSM2235765 | B | 1390.305549 | 1308.247942 | 2698.553491 |
| GSE84437_GSM2235766 | A | -702.8540886 | 312.6313062 | -390.2227824 |
| GSE84437_GSM2235767 | B | 1426.341061 | 1119.764068 | 2546.105129 |
| GSE84437_GSM2235768 | C | 1425.273849 | 2766.449429 | 4191.723278 |
| GSE84437_GSM2235769 | A | -272.5306335 | 450.9095311 | 178.3788976 |
| GSE84437_GSM2235770 | B | 14.11493528 | 1278.05468 | 1292.169616 |
| GSE84437_GSM2235771 | B | 786.5764438 | 1455.929955 | 2242.506399 |
| GSE84437_GSM2235772 | C | 887.8543767 | 1613.691554 | 2501.545931 |
| GSE84437_GSM2235773 | B | 788.8689013 | 1407.948975 | 2196.817876 |
| GSE84437_GSM2235774 | B | 601.6540403 | 1213.845363 | 1815.499404 |
| GSE84437_GSM2235775 | B | 600.0889556 | 1625.226077 | 2225.315032 |
| GSE84437_GSM2235776 | B | 715.8592797 | 1543.615323 | 2259.474603 |
| GSE84437_GSM2235777 | B | 742.4321678 | 2107.901321 | 2850.333488 |
| GSE84437_GSM2235778 | A | 387.3240114 | 714.0651867 | 1101.389198 |
| GSE84437_GSM2235779 | B | -46.23113501 | 1615.080288 | 1568.849153 |
| GSE84437_GSM2235780 | B | 564.5221911 | 1869.533782 | 2434.055973 |
| GSE84437_GSM2235781 | B | 5.832689484 | 1086.220225 | 1092.052914 |
| GSE84437_GSM2235782 | B | 850.6123751 | 1364.85244 | 2215.464816 |
| GSE84437_GSM2235783 | B | 1166.26108 | 1446.008982 | 2612.270062 |
| GSE84437_GSM2235784 | C | 111.8657911 | 2205.848558 | 2317.714349 |
| GSE84437_GSM2235785 | C | 504.3747763 | 2837.949839 | 3342.324615 |
| GSE84437_GSM2235786 | C | 1437.727148 | 2204.093299 | 3641.820447 |
| GSE84437_GSM2235787 | B | 1209.672712 | 1277.128104 | 2486.800815 |
| GSE84437_GSM2235788 | C | 773.1125069 | 2539.661893 | 3312.7744 |
| GSE84437_GSM2235789 | B | 346.5767333 | 1747.450327 | 2094.02706 |
| GSE84437_GSM2235790 | C | 38.51389877 | 1894.599503 | 1933.113402 |
| GSE84437_GSM2235791 | B | 1724.480961 | 1703.335877 | 3427.816838 |
| GSE84437_GSM2235792 | A | 703.4770779 | 1050.006309 | 1753.483387 |
| GSE84437_GSM2235793 | B | 1837.3233 | 1721.034597 | 3558.357897 |
| GSE84437_GSM2235794 | B | 906.7507841 | 1977.448226 | 2884.19901 |
| GSE84437_GSM2235795 | B | 1060.671447 | 996.504768 | 2057.176215 |
| GSE84437_GSM2235796 | B | 1419.837261 | 1792.383555 | 3212.220816 |
| GSE84437_GSM2235797 | B | -515.6088279 | 1274.010306 | 758.4014786 |
| GSE84437_GSM2235798 | A | 71.76060363 | 751.783541 | 823.5441447 |
| GSE84437_GSM2235799 | A | -396.4976756 | 927.7253692 | 531.2276937 |
| GSE84437_GSM2235800 | C | 1239.728152 | 2452.991449 | 3692.719601 |
| GSE84437_GSM2235801 | C | 753.8661372 | 1933.352765 | 2687.218902 |
| GSE84437_GSM2235802 | C | 197.1159863 | 2096.825045 | 2293.941031 |
| GSE84437_GSM2235803 | A | 360.2053017 | 1321.22117 | 1681.426471 |
| GSE84437_GSM2235804 | A | 847.7586369 | 1448.872302 | 2296.630939 |
| GSE84437_GSM2235805 | A | 787.4347398 | 852.3142095 | 1639.748949 |
| GSE84437_GSM2235806 | A | -1152.315509 | 569.7265017 | -582.5890069 |
| GSE84437_GSM2235807 | A | 254.0285261 | 711.0437111 | 965.0722372 |
| GSE84437_GSM2235808 | A | 408.042061 | 1691.070332 | 2099.112393 |
| GSE84437_GSM2235809 | C | 255.2501607 | 2455.491066 | 2710.741227 |
| GSE84437_GSM2235810 | A | -64.3324105 | 681.3174022 | 616.9849917 |
| GSE84437_GSM2235811 | B | 868.2989586 | 1495.792105 | 2364.091064 |
| GSE84437_GSM2235812 | A | 238.0648951 | 661.2079518 | 899.2728469 |
| GSE84437_GSM2235813 | C | -134.537127 | 1608.602792 | 1474.065665 |
| GSE84437_GSM2235814 | C | 971.0598629 | 2072.08809 | 3043.147952 |
| GSE84437_GSM2235815 | A | -26.77963475 | 973.7384397 | 946.9588049 |
| GSE84437_GSM2235816 | C | 558.0012861 | 1985.77804 | 2543.779326 |
| GSE84437_GSM2235817 | B | 190.8697223 | 1112.491434 | 1303.361157 |
| GSE84437_GSM2235818 | B | 476.6828604 | 2346.624748 | 2823.307608 |
| GSE84437_GSM2235819 | A | 633.4508289 | 719.4768453 | 1352.927674 |
| GSE84437_GSM2235820 | C | 1407.754631 | 2153.777432 | 3561.532063 |
| GSE84437_GSM2235821 | C | 299.43758 | 1801.783381 | 2101.220961 |
| GSE84437_GSM2235822 | A | -128.2318748 | 706.7183964 | 578.4865216 |
| GSE84437_GSM2235823 | C | 1350.290489 | 2075.652691 | 3425.94318 |
| GSE84437_GSM2235824 | C | 1562.172941 | 1856.05255 | 3418.225491 |
| GSE84437_GSM2235825 | B | 1511.45076 | 1142.533573 | 2653.984334 |
| GSE84437_GSM2235826 | A | 397.2480783 | 720.8779864 | 1118.126065 |
| GSE84437_GSM2235827 | C | 1470.830894 | 1595.585459 | 3066.416354 |
| GSE84437_GSM2235828 | C | 1464.327905 | 2961.473838 | 4425.801743 |
| GSE84437_GSM2235829 | C | 264.3787356 | 1773.41582 | 2037.794556 |
| GSE84437_GSM2235830 | A | -419.2488374 | 15.02048609 | -404.2283513 |
| GSE84437_GSM2235831 | A | -395.6461046 | 709.0589583 | 313.4128538 |
| GSE84437_GSM2235837 | C | 1527.188564 | 1789.502233 | 3316.690797 |
| GSE84437_GSM2235838 | A | 841.6997537 | 807.2695431 | 1648.969297 |
| GSE84437_GSM2235839 | A | 214.9238597 | 956.9160403 | 1171.8399 |
| GSE84437_GSM2235840 | A | -164.7169181 | 736.3864247 | 571.6695066 |
| GSE84437_GSM2235841 | B | 1183.036846 | 1785.13177 | 2968.168616 |
| GSE84437_GSM2235842 | A | 114.9965441 | 314.1558652 | 429.1524093 |
| GSE84437_GSM2235843 | B | 803.8168521 | 1719.990925 | 2523.807777 |
| GSE84437_GSM2235844 | A | 39.8957989 | 1611.705966 | 1651.601765 |
| GSE84437_GSM2235845 | A | 746.4995983 | 1658.92531 | 2405.424909 |
| GSE84437_GSM2235846 | B | 295.0674185 | 1270.14422 | 1565.211639 |
| GSE84437_GSM2235847 | C | 1141.283076 | 2870.882556 | 4012.165632 |
| GSE84437_GSM2235848 | C | 1868.445359 | 1696.614026 | 3565.059386 |
| GSE84437_GSM2235849 | C | 892.0589054 | 1581.85874 | 2473.917645 |
| GSE84437_GSM2235850 | C | 1042.344805 | 2141.505323 | 3183.850128 |
| GSE84437_GSM2235851 | B | -127.3440146 | 1536.499555 | 1409.155541 |
| GSE84437_GSM2235852 | C | 879.3461629 | 2901.645905 | 3780.992068 |
| GSE84437_GSM2235853 | C | 190.0246842 | 2397.612058 | 2587.636742 |
| GSE84437_GSM2235854 | C | 845.5973163 | 1915.647874 | 2761.245191 |
| GSE84437_GSM2235855 | C | 974.7863987 | 3340.076574 | 4314.862973 |
| GSE84437_GSM2235862 | C | 785.577344 | 2664.131246 | 3449.70859 |
| GSE84437_GSM2235863 | B | 1185.822911 | 1428.626067 | 2614.448977 |
| GSE84437_GSM2235864 | A | 403.3069785 | 1334.585681 | 1737.89266 |
| GSE84437_GSM2235865 | A | -274.5879646 | 690.2918118 | 415.7038471 |
| GSE84437_GSM2235866 | B | 1316.007495 | 1809.752753 | 3125.760248 |
| GSE84437_GSM2235867 | B | 998.455573 | 2145.217104 | 3143.672677 |
| GSE84437_GSM2235878 | B | -150.0554593 | 1763.241181 | 1613.185722 |
| GSE84437_GSM2235879 | B | 1469.820253 | 1688.891306 | 3158.711559 |
| GSE84437_GSM2235880 | C | 653.4505102 | 1979.916765 | 2633.367275 |
| GSE84437_GSM2235881 | B | 251.1019568 | 1507.703742 | 1758.805699 |
| GSE84437_GSM2235882 | C | 1072.746044 | 2320.037875 | 3392.783919 |
| GSE84437_GSM2235883 | C | 1223.720569 | 1791.163053 | 3014.883622 |
| GSE84437_GSM2235884 | C | 1817.35721 | 2733.795798 | 4551.153008 |
| GSE84437_GSM2235885 | B | 1188.061634 | 2572.953882 | 3761.015517 |
| GSE84437_GSM2235886 | B | 719.7457559 | 913.2842903 | 1633.030046 |
| GSE84437_GSM2235887 | A | 309.8152031 | 422.7673235 | 732.5825266 |
| GSE84437_GSM2235888 | C | -110.0970476 | 1374.687128 | 1264.59008 |
| GSE84437_GSM2235889 | C | -624.0130285 | 1275.881906 | 651.8688771 |
| GSE84437_GSM2235899 | B | 702.0766931 | 1948.684335 | 2650.761028 |
| GSE84437_GSM2235900 | C | 988.0512427 | 2472.564898 | 3460.616141 |
| GSE84437_GSM2235901 | B | 541.1220648 | 686.2968189 | 1227.418884 |
| GSE84437_GSM2235902 | B | 1568.659621 | 1686.087039 | 3254.74666 |
| GSE84437_GSM2235903 | A | 689.6361818 | 668.792155 | 1358.428337 |
| GSE84437_GSM2235904 | A | 627.1824746 | 498.8229032 | 1126.005378 |
| GSE84437_GSM2235905 | C | 1481.343809 | 2553.803459 | 4035.147268 |
| GSE84437_GSM2235906 | B | 137.9999487 | 1147.934993 | 1285.934941 |
| GSE84437_GSM2235907 | B | 12.20804728 | 1444.967383 | 1457.175431 |
| GSE84437_GSM2235908 | A | 754.2880735 | 965.8222179 | 1720.110291 |
| GSE84437_GSM2235909 | A | 379.8307557 | 1300.377129 | 1680.207884 |
| GSE84437_GSM2235910 | C | 1000.120315 | 2548.176639 | 3548.296953 |
| GSE84437_GSM2235921 | A | -661.0676618 | 210.1390869 | -450.9285749 |
| GSE84437_GSM2235922 | B | 324.3454719 | 1822.694874 | 2147.040345 |
| GSE84437_GSM2235923 | A | -172.826121 | 399.0913497 | 226.2652287 |
| GSE84437_GSM2235924 | A | 4.678940281 | 620.9322766 | 625.6112169 |
| GSE84437_GSM2235925 | C | -13.72556449 | 1354.102512 | 1340.376947 |
| GSE84437_GSM2235926 | C | 1270.250564 | 2708.650539 | 3978.901103 |
| GSE84437_GSM2235927 | A | -776.4423499 | 48.75521018 | -727.6871397 |
| GSE84437_GSM2235928 | A | 115.4867479 | 378.3978306 | 493.8845785 |
| GSE84437_GSM2235929 | C | 2111.529465 | 2004.995291 | 4116.524756 |
| GSE84437_GSM2235930 | A | 396.9673735 | 1117.98868 | 1514.956054 |
| GSE84437_GSM2235931 | C | -245.6527654 | 1929.546599 | 1683.893834 |
| GSE84437_GSM2235932 | A | -914.5340127 | 1108.003814 | 193.4698012 |
| GSE84437_GSM2235933 | B | 2162.327908 | 2232.069393 | 4394.397301 |
| GSE84437_GSM2235934 | C | 1366.177927 | 3276.719934 | 4642.897861 |
| GSE84437_GSM2235935 | C | 800.5209297 | 1652.801406 | 2453.322336 |
| GSE84437_GSM2235936 | A | -57.54957235 | 1103.645912 | 1046.09634 |
| GSE84437_GSM2235937 | A | -276.0938578 | 1158.419108 | 882.3252499 |
| GSE84437_GSM2235938 | A | -742.7743182 | 819.3185331 | 76.54421491 |
| GSE84437_GSM2235939 | B | 1036.833279 | 1416.075347 | 2452.908626 |
| GSE84437_GSM2235940 | C | 1156.080237 | 2276.494795 | 3432.575032 |
| GSE84437_GSM2235941 | B | 559.508124 | 2525.960813 | 3085.468937 |
| GSE84437_GSM2235942 | A | -482.0842179 | 1151.752381 | 669.668163 |
| GSE84437_GSM2235943 | C | 1098.376052 | 2539.526983 | 3637.903035 |
| GSE84437_GSM2235944 | C | 1414.646766 | 2413.827487 | 3828.474253 |
| GSE84437_GSM2235945 | B | 981.6690647 | 1427.913647 | 2409.582711 |
| GSE84437_GSM2235946 | A | -621.5559555 | 1165.286753 | 543.7307975 |
| GSE84437_GSM2235947 | C | 47.54376062 | 2233.606826 | 2281.150587 |
| GSE84437_GSM2235948 | C | 2011.730446 | 2179.630506 | 4191.360952 |
| GSE84437_GSM2235949 | C | 582.6130371 | 2609.193374 | 3191.806411 |
| GSE84437_GSM2235950 | A | 1426.960453 | 1221.980199 | 2648.940652 |
| GSE84437_GSM2235951 | B | 1758.021465 | 1530.397383 | 3288.418848 |
| GSE84437_GSM2235952 | B | -417.9335696 | 1231.380214 | 813.4466441 |
| GSE84437_GSM2235953 | A | -1.685450557 | -61.09470728 | -62.78015784 |
| GSE84437_GSM2235954 | C | 848.6682895 | 2219.218429 | 3067.886718 |
| GSE84437_GSM2235955 | B | 797.6785415 | 1493.353854 | 2291.032396 |
| GSE84437_GSM2235956 | A | -528.9049476 | 188.1615936 | -340.743354 |
| GSE84437_GSM2235957 | B | 321.512702 | 1495.178376 | 1816.691078 |
| GSE84437_GSM2235958 | A | 1209.215621 | 1294.604783 | 2503.820404 |
| GSE84437_GSM2235959 | A | -1161.170201 | 465.7303386 | -695.4398622 |
| GSE84437_GSM2235960 | B | -560.7981556 | 1033.712 | 472.9138449 |
| GSE84437_GSM2235961 | B | 1564.24566 | 1269.340517 | 2833.586177 |
| GSE84437_GSM2235962 | B | 461.7829708 | 1540.588729 | 2002.3717 |
| GSE84437_GSM2235963 | A | -971.591766 | 156.4368678 | -815.1548983 |
| GSE84437_GSM2235964 | C | 627.2243992 | 2400.45606 | 3027.680459 |
| GSE84437_GSM2235965 | A | -716.4513281 | 1208.153244 | 491.701916 |
| GSE84437_GSM2235966 | B | 171.915413 | 1397.943145 | 1569.858558 |
| GSE84437_GSM2235967 | A | -1229.330057 | -697.1457097 | -1926.475767 |
| GSE84437_GSM2235968 | A | 321.7132712 | 500.6573013 | 822.3705725 |
| GSE84437_GSM2235969 | A | -383.4905771 | 1364.534851 | 981.0442736 |
| GSE84437_GSM2235970 | C | 1424.036198 | 1841.665924 | 3265.702122 |
| GSE84437_GSM2235971 | C | 1246.859735 | 2079.705477 | 3326.565213 |
| GSE84437_GSM2235972 | A | -1165.864306 | 525.0588286 | -640.8054773 |
| GSE84437_GSM2235973 | A | -786.5040712 | 283.3223187 | -503.1817525 |
| GSE84437_GSM2235974 | A | -1132.14927 | 180.5939078 | -951.5553618 |
| GSE84437_GSM2235975 | A | -494.8666109 | 2225.576512 | 1730.709901 |
| GSE84437_GSM2235976 | B | -157.8521911 | 2135.076775 | 1977.224584 |
| GSE84437_GSM2235977 | A | 172.7433355 | -23.2086806 | 149.534655 |
| GSE84437_GSM2235978 | C | 1083.452662 | 2767.324783 | 3850.777445 |
| GSE84437_GSM2235979 | B | 449.6150773 | 1246.052825 | 1695.667902 |
| GSE84437_GSM2235980 | B | 280.9421875 | 2448.344927 | 2729.287115 |
| GSE84437_GSM2235981 | B | 355.5030308 | 1802.816995 | 2158.320026 |
| GSE84437_GSM2235982 | B | 693.352461 | 2052.181389 | 2745.53385 |
| GSE84437_GSM2235983 | C | 1277.375422 | 3101.140145 | 4378.515568 |
| GSE84437_GSM2235984 | B | -55.9486124 | 1215.988568 | 1160.039956 |
| GSE84437_GSM2235985 | B | 217.7747583 | 2117.367538 | 2335.142296 |
| GSE84437_GSM2235986 | A | -51.85488345 | 1189.499969 | 1137.645085 |
| GSE84437_GSM2235987 | B | 1052.749076 | 1830.742928 | 2883.492004 |
| GSE84437_GSM2235988 | A | -218.4530923 | 779.3486134 | 560.8955211 |
| GSE84437_GSM2235991 | B | 926.8635288 | 1450.140688 | 2377.004217 |
| GSE84437_GSM2235992 | A | 503.9210151 | 1186.542058 | 1690.463073 |
| GSE84437_GSM2235993 | C | 920.9779565 | 2926.267152 | 3847.245109 |
| GSE84437_GSM2235994 | A | 560.1806023 | -64.32295952 | 495.8576427 |
| GSE84437_GSM2235995 | A | -580.2399427 | 760.5454678 | 180.305525 |
| GSE84437_GSM2235996 | B | 629.828242 | 2296.557984 | 2926.386226 |
| GSE84437_GSM2235997 | B | -105.1510754 | 1020.193083 | 915.0420072 |
| GSE84437_GSM2235998 | A | -252.3394345 | 331.7925122 | 79.45307771 |
| GSE84437_GSM2235999 | A | -79.79153217 | 803.1570034 | 723.3654712 |
| GSE84437_GSM2236000 | A | 225.3732305 | 802.4411467 | 1027.814377 |
| GSE84437_GSM2236001 | B | 1273.451182 | 1671.171104 | 2944.622286 |
| GSE84437_GSM2236002 | A | -812.2306735 | -295.1174388 | -1107.348112 |
| GSE84437_GSM2236003 | A | 526.4351698 | 421.6664665 | 948.1016363 |
| GSE84437_GSM2236004 | A | -194.2088767 | 816.0011474 | 621.7922707 |
| GSE84437_GSM2236005 | A | -90.397921 | 427.9949773 | 337.5970563 |
| GSE84437_GSM2236006 | A | -70.23005037 | 627.0039312 | 556.7738808 |
| GSE84437_GSM2236007 | B | 1034.619719 | 2105.457075 | 3140.076794 |
| GSE84437_GSM2236008 | C | 2008.125733 | 2417.362632 | 4425.488365 |
| GSE84437_GSM2236009 | A | 521.6552457 | 1140.794759 | 1662.450005 |
| GSE84437_GSM2236010 | C | -19.47858103 | 1301.596718 | 1282.118137 |
| GSE84437_GSM2236011 | A | 467.0059156 | 1373.186872 | 1840.192788 |
| GSE84437_GSM2236012 | B | -52.71515184 | 1036.462949 | 983.7477968 |
| GSE84437_GSM2236013 | B | 890.530555 | 1504.372495 | 2394.90305 |
| GSE84437_GSM2236014 | A | -897.0046595 | 1233.452536 | 336.4478767 |
| GSE84437_GSM2236015 | C | 667.3809915 | 1697.954558 | 2365.335549 |
| GSE84437_GSM2236016 | A | -767.3431259 | 537.5624403 | -229.7806856 |
| GSE84437_GSM2236017 | A | 63.9643493 | 698.6713014 | 762.6356507 |
| GSE84437_GSM2236018 | B | 166.6402556 | 1321.910482 | 1488.550738 |
| GSE84437_GSM2236019 | A | 70.02918475 | 501.2125928 | 571.2417776 |
| GSE84437_GSM2236020 | A | -134.8731446 | 1057.896449 | 923.0233041 |
| GSE84437_GSM2236021 | B | 1745.711784 | 1562.790298 | 3308.502082 |
| GSE84437_GSM2236022 | A | -393.906835 | 579.253733 | 185.346898 |
| GSE84437_GSM2236023 | C | -29.52097647 | 2251.150661 | 2221.629684 |
| GSE84437_GSM2236024 | C | 315.705607 | 2400.612282 | 2716.317889 |
| GSE84437_GSM2236025 | C | 1534.796211 | 2718.719808 | 4253.516019 |
| GSE84437_GSM2236026 | B | 1859.290759 | 1586.856146 | 3446.146906 |
| GSE84437_GSM2236027 | B | 870.8923487 | 1528.45109 | 2399.343439 |
| GSE84437_GSM2236028 | B | 297.4575977 | 1743.414038 | 2040.871636 |
| GSE84437_GSM2236029 | C | -542.2259814 | 2246.854694 | 1704.628713 |
| GSE84437_GSM2236030 | B | 276.3295744 | 1065.292972 | 1341.622546 |
| GSE84437_GSM2236031 | C | 1673.132599 | 2020.529484 | 3693.662083 |
| GSE84437_GSM2236032 | B | -327.045059 | 1213.023031 | 885.9779723 |
| GSE84437_GSM2236033 | A | -133.0320989 | 354.0386614 | 221.0065625 |
| GSE84437_GSM2236034 | C | 646.4651681 | 2575.369065 | 3221.834233 |
| GSE84437_GSM2236036 | A | -623.4792239 | 448.4262561 | -175.0529678 |
| GSE84437_GSM2236037 | B | 1000.911652 | 1555.017588 | 2555.92924 |
| GSE84437_GSM2236038 | C | 1049.59928 | 1881.984679 | 2931.583959 |
| GSE84437_GSM2236039 | A | -395.5816577 | 319.014451 | -76.56720665 |
| GSE84437_GSM2236040 | B | -911.1232952 | 1147.603164 | 236.4798689 |
| GSE84437_GSM2236041 | C | 1436.366544 | 2506.05496 | 3942.421504 |
| GSE84437_GSM2236042 | A | -286.9465803 | 953.2050226 | 666.2584423 |
| GSE84437_GSM2236043 | C | 910.8094435 | 1911.749199 | 2822.558642 |
| GSE84437_GSM2236044 | A | -588.702911 | -82.0927322 | -670.7956432 |
| GSE84437_GSM2236045 | A | 43.78167168 | 1585.371264 | 1629.152936 |
| GSE84437_GSM2236046 | A | -296.955375 | 722.0104343 | 425.0550593 |
| GSE84437_GSM2236047 | C | 1015.448053 | 2584.091082 | 3599.539135 |
| GSE84437_GSM2236048 | A | -850.540093 | 1314.722272 | 464.1821786 |
| GSE84437_GSM2236049 | C | 921.0918976 | 3028.464099 | 3949.555997 |
| GSE84437_GSM2236050 | A | -509.7082239 | 687.1851175 | 177.4768936 |
| GSE84437_GSM2236051 | C | 1192.989646 | 1531.089679 | 2724.079325 |
| GSE84437_GSM2236052 | A | 27.05456623 | 518.1328771 | 545.1874433 |
| GSE84437_GSM2236053 | A | 1110.156513 | 1147.907541 | 2258.064054 |
| GSE84437_GSM2236054 | B | 1441.171063 | 1712.383548 | 3153.554611 |
| GSE84437_GSM2236055 | A | -27.07959354 | 446.3499392 | 419.2703457 |
| GSE84437_GSM2236056 | A | -215.3524297 | 674.4588367 | 459.106407 |
| GSE84437_GSM2236057 | C | 1195.211977 | 1971.149492 | 3166.361469 |
| GSE84437_GSM2236058 | B | 612.268287 | 939.9262399 | 1552.194527 |
| GSE84437_GSM2236059 | B | 1125.402382 | 1229.745472 | 2355.147854 |
| GSE84437_GSM2236060 | B | 2259.45852 | 2619.031221 | 4878.489741 |
| GSE84437_GSM2236061 | C | 2012.969201 | 2702.147304 | 4715.116505 |
| GSE84437_GSM2236062 | B | 684.0920409 | 1404.599048 | 2088.691089 |
| GSE84437_GSM2236063 | B | 1024.824026 | 1010.504743 | 2035.32877 |
| GSE84437_GSM2236064 | B | -246.8644013 | 747.6065573 | 500.742156 |
| GSE84437_GSM2236065 | A | 245.8175312 | 779.922947 | 1025.740478 |
| GSE84437_GSM2236066 | A | 947.0702927 | 1113.852538 | 2060.92283 |
| GSE84437_GSM2236067 | B | 635.0886251 | 1671.668558 | 2306.757183 |
| GSE84437_GSM2236068 | C | 1514.771682 | 1481.377581 | 2996.149263 |
| GSE84437_GSM2236069 | A | -1188.366095 | 180.7622745 | -1007.60382 |
| GSE84437_GSM2236070 | C | 405.2655029 | 2385.225778 | 2790.491281 |
| GSE84437_GSM2236071 | C | 275.5595558 | 2228.82803 | 2504.387586 |
| GSE84437_GSM2236072 | C | 1188.163976 | 2191.70564 | 3379.869616 |
| GSE84437_GSM2236073 | A | -12.35414472 | 856.0155082 | 843.6613634 |
| GSE84437_GSM2236074 | A | -254.1822368 | 954.6207886 | 700.4385518 |
| GSE84437_GSM2236075 | B | 1449.831752 | 1761.304027 | 3211.135779 |
| GSE84437_GSM2236076 | C | 406.6501689 | 2895.083206 | 3301.733375 |
| GSE84437_GSM2236077 | B | -1.979365834 | 1816.772356 | 1814.79299 |
| GSE84437_GSM2236078 | A | -887.7571125 | -102.9051191 | -990.6622316 |
| GSE84437_GSM2236079 | C | 227.866786 | 2457.21693 | 2685.083716 |
| GSE84437_GSM2236080 | B | 682.648737 | 2042.416784 | 2725.065521 |
| GSE84437_GSM2236082 | C | -49.54713375 | 1716.827853 | 1667.280719 |
| GSE84437_GSM2236083 | A | -346.2556465 | 1089.365833 | 743.1101866 |
| GSE84437_GSM2236084 | A | 294.7863123 | 1225.78146 | 1520.567772 |
| GSE84437_GSM2236085 | B | 354.2847579 | 1871.749705 | 2226.034463 |
| GSE84437_GSM2236086 | C | 1106.317095 | 2749.759441 | 3856.076535 |
| GSE84437_GSM2236087 | B | 535.8169478 | 1669.418887 | 2205.235835 |
| GSE84437_GSM2236088 | B | 588.416377 | 1280.673329 | 1869.089706 |
| GSE84437_GSM2236089 | C | 607.1538335 | 2014.620677 | 2621.774511 |
| GSE84437_GSM2236090 | C | 732.3576437 | 1947.881148 | 2680.238792 |
| GSE84437_GSM2236091 | B | 547.9768359 | 1340.923051 | 1888.899887 |
| GSE84437_GSM2236092 | B | 307.0601022 | 1288.503385 | 1595.563487 |
| GSE84437_GSM2236093 | B | 176.8460199 | 1328.03194 | 1504.87796 |
| GSE84437_GSM2236094 | B | 260.0291842 | 1371.185656 | 1631.21484 |
| GSE84437_GSM2236095 | B | 435.3804969 | 1342.486686 | 1777.867183 |

**Supplementary Table 4: 21 biological processes from previous studies and the KEGG database.**

| **name** | **Source** | **Gene** |
| --- | --- | --- |
| Antigen processing and presentation | PMID: 27855702 | IFNG TNF PSME1 PSME2 PSME3 HSPA8 HSPA1A HSPA2 HSPA1L HSPA1B HSPA6 HSPA4 HSP90AA1 HSP90AB1 HLA-A HLA-B HLA-C HLA-F HLA-G HLA-E HSPA5 CANX B2M PDIA3 CALR TAPBP TAP1 TAP2 CD8A CD8B CD8B2 KIR3DL2 KIR3DL1 KIR3DL3 KIR2DL2 KIR2DL1 KIR2DL3 KIR2DL4 KIR2DL5A KLRC1 KLRC2 KLRC3 KLRC4 KLRD1 KIR2DS1 KIR2DS3 KIR2DS4 KIR2DS5 KIR2DS2 IFI30 LGMN CTSB HLA-DMA HLA-DMB HLA-DOA HLA-DOB HLA-DPA1 HLA-DPB1 HLA-DQA1 HLA-DQA2 HLA-DQB1 HLA-DRA HLA-DRB1 HLA-DRB3 HLA-DRB4 HLA-DRB5 CD74 CTSL CTSS CD4 CIITA RFX5 RFXANK RFXAP CREB1 NFYA NFYB NFYC |
| Base excision repair | KEGG hsa03410 | OGG1 NTHL1 NEIL1 NEIL2 NEIL3 UNG SMUG1 MUTYH MPG MBD4 TDG APEX1 APEX2 POLB POLL HMGB1 XRCC1 PCNA POLD1 POLD2 POLD3 POLD4 POLE POLE2 POLE3 POLE4 LIG1 LIG3 PARP1 PARP2 PARP3 PARP4 FEN1 |
| ECM-receptor interaction | KEGG hsa04512 | COL1A1 COL1A2 COL2A1 COL4A2 COL4A4 COL4A6 COL4A1 COL4A5 COL4A3 COL6A1 COL6A2 COL6A3 COL6A6 COL6A5 COL9A1 COL9A2 COL9A3 LAMA1 LAMA2 LAMA3 LAMA5 LAMA4 LAMB1 LAMB2 LAMB3 LAMB4 LAMC1 LAMC2 LAMC3 CHAD RELN THBS1 COMP THBS2 THBS3 THBS4 FN1 SPP1 VTN TNC TNN TNR TNXB NPNT FRAS1 FREM2 FREM1 DSPP VWF IBSP DMP1 AGRN HSPG2 ITGA1 ITGA2 ITGA2B ITGA3 ITGA4 ITGA5 ITGA6 ITGA7 ITGA8 ITGA9 ITGA10 ITGA11 ITGAV ITGB1 ITGB3 ITGB4 ITGB5 ITGB6 ITGB7 ITGB8 CD44 SDC1 SDC4 SV2C SV2B SV2A CD36 GP5 GP1BA GP1BB GP9 GP6 DAG1 CD47 HMMR |
| PI3K-Akt signaling pathway | KEGG hsa04151 | EGF TGFA EREG AREG FGF1 FGF2 FGF3 FGF4 FGF17 FGF6 FGF7 FGF8 FGF9 FGF10 FGF16 FGF5 FGF18 FGF20 FGF22 FGF19 FGF21 FGF23 NGF BDNF NTF3 NTF4 INS IGF1 IGF2 PDGFA PDGFB PDGFC PDGFD CSF1 KITLG FLT3LG VEGFA VEGFB PGF VEGFC VEGFD HGF ANGPT1 ANGPT2 ANGPT4 EFNA1 EFNA2 EFNA3 EFNA4 EFNA5 EGFR ERBB2 ERBB3 ERBB4 FGFR1 FGFR2 FGFR3 FGFR4 NGFR NTRK1 NTRK2 INSR IGF1R PDGFRA PDGFRB CSF1R KIT FLT3 FLT1 FLT4 KDR MET TEK EPHA2 GRB2 SOS1 SOS2 HRAS KRAS NRAS RAF1 MAP2K1 MAP2K2 MAPK1 MAPK3 IRS1 TLR2 TLR4 RAC1 IGH SYK CD19 PIK3AP1 GH1 GH2 CSH1 CSH2 PRL OSM IL2 IL3 IL6 IL4 IL7 IFNA1 IFNA2 IFNA4 IFNA5 IFNA6 IFNA7 IFNA8 IFNA10 IFNA13 IFNA14 IFNA16 IFNA17 IFNA21 IFNB1 EPO CSF3 GHR PRLR OSMR IL2RA IL2RB IL2RG IL3RA IL6R IL4R IL7R IFNAR1 IFNAR2 EPOR CSF3R JAK1 JAK2 JAK3 COL1A1 COL1A2 COL2A1 COL4A2 COL4A4 COL4A6 COL4A1 COL4A5 COL4A3 COL6A1 COL6A2 COL6A3 COL6A6 COL6A5 COL9A1 COL9A2 COL9A3 LAMA1 LAMA2 LAMA3 LAMA5 LAMA4 LAMB1 LAMB2 LAMB3 LAMB4 LAMC1 LAMC2 LAMC3 CHAD RELN THBS1 COMP THBS2 THBS3 THBS4 FN1 SPP1 VTN TNC TNN TNR TNXB VWF IBSP ITGA1 ITGA2 ITGA2B ITGA3 ITGA4 ITGA5 ITGA6 ITGA7 ITGA8 ITGA9 ITGA10 ITGA11 ITGAV ITGB1 ITGB3 ITGB4 ITGB5 ITGB6 ITGB7 ITGB8 PTK2 PIK3CA PIK3CD PIK3CB PIK3R1 PIK3R2 PIK3R3 F2R CHRM1 CHRM2 LPAR1 LPAR2 LPAR3 LPAR4 LPAR5 LPAR6 GNB1 GNB2 GNB3 GNB4 GNB5 GNG2 GNG3 GNG4 GNG5 GNG7 GNG8 GNG10 GNG11 GNG12 GNG13 GNGT1 GNGT2 PIK3CG PIK3R5 PIK3R6 PDPK1 STK11 PRKAA1 PRKAA2 DDIT4 TSC1 TSC2 RHEB MLST8 MTOR RPTOR EIF4EBP1 EIF4E EIF4E2 EIF4E1B RPS6KB1 RPS6KB2 EIF4B RPS6 PRKCA PKN1 PKN2 PKN3 SGK1 SGK2 SGK3 C8orf44-SGK3 AKT1 AKT2 AKT3 MAGI1 MAGI2 PTEN THEM4 PPP2CA PPP2CB PPP2R1B PPP2R1A PPP2R2A PPP2R2B PPP2R2C PPP2R2D PPP2R3B PPP2R3C PPP2R3A PPP2R5B PPP2R5C PPP2R5D PPP2R5E PPP2R5A HSP90AA1 HSP90AB1 HSP90B1 CDC37 CRTC2 PHLPP1 PHLPP2 TCL1A TCL1B MTCP1 NOS3 BRCA1 GSK3B GYS2 GYS1 PCK1 PCK2 G6PC1 G6PC2 G6PC3 MYC CCND1 CDKN1A CDKN1B CDK2 CDK4 CDK6 CCND2 CCND3 CCNE1 CCNE2 FOXO3 RBL2 FASLG BCL2L11 YWHAZ YWHAB YWHAQ YWHAE YWHAH YWHAG BAD BCL2L1 BCL2 CASP9 CREB1 ATF2 ATF4 CREB3 CREB3L1 CREB3L2 CREB3L3 CREB3L4 CREB5 ATF6B MCL1 RXRA NR4A1 IKBKG CHUK IKBKB RELA NFKB1 MYB MDM2 TP53 |
| NF-kappa B signaling pathway | KEGG hsa04064 | LCK ZAP70 LAT PLCG1 PRKCQ IGH SYK LYN BLNK BTK PLCG2 PRKCB CARD10 CARD11 CARD14 BCL10 MALT1 IL1B IL1R1 MYD88 IRAK1 IRAK4 TRAF6 TNF TNFRSF1A RIPK1 TRADD TRAF2 TRAF5 BIRC2 BIRC3 EDA EDAR EDARADD CYLD EDA2R DDX58 TRIM25 LBP CD14 TLR4 LY96 TIRAP TICAM2 TICAM1 CD40LG CD40 TRAF3 TNFSF11 TNFRSF11A LTA LTB TNFSF14 LTBR MAP3K14 MAP3K7 TAB1 TAB2 TAB3 TNFSF13B TNFRSF13C IKBKG CHUK IKBKB PARP1 PIAS4 UBE2I ATM PIDD1 ERC1 NFKBIA NFKB1 RELA CFLAR XIAP BCL2L1 BCL2 GADD45A GADD45B GADD45G TRAF1 BCL2A1 NFKB2 CXCL8 TNFAIP3 PTGS2 CCL4 CCL4L2 CCL4L1 CXCL1 CXCL2 CXCL3 VCAM1 PLAU CSNK2A1 CSNK2A2 CSNK2A3 CSNK2B RELB CCL13 CCL19 CCL21 CXCL12 ICAM1 |
| TGF-beta signaling pathway | KEGG hsa04350 | AC023512.1 ACVR1 ACVR1C ACVR2A ACVR2B ACVRL1 AMH AMHR2 BMP2 BMP4 BMP5 BMP6 BMP7 BMP8A BMP8B BMPR1A BMPR1B BMPR2 CDKN2B CHRD COMP CREBBP CUL1 DCN E2F4 E2F5 EP300 FST GDF5 GDF6 GDF7 ID1 ID2 ID3 ID4 IFNG INHBA INHBB INHBC INHBE LEFTY1 LEFTY2 LTBP1 MAPK1 MAPK3 MYC NODAL NOG PITX2 PPP2CA PPP2CB PPP2R1A PPP2R1B RBL1 RBL2 RBX1 RHOA ROCK1 ROCK2 RPS6KB1 RPS6KB2 SKP1 SMAD1 SMAD2 SMAD3 SMAD4 SMAD5 SMAD6 SMAD7 SMAD9 SMURF1 SMURF2 SP1 TFDP1 TGFB1 TGFB2 TGFB3 TGFBR1 TGFBR2 THBS1 THBS2 THBS3 THBS4 TNF ZFYVE16 ZFYVE9 |
| Wnt signaling pathway | KEGG hsa04310 | AC023512.1 APC APC2 AXIN1 AXIN2 BTRC CACYBP CAMK2A CAMK2B CAMK2D CAMK2G CCND1 CCND2 CCND3 CER1 CHD8 CHP1 CHP2 CREBBP CSNK1A1 CSNK1A1L CSNK1E CSNK2A1 CSNK2A2 CSNK2B CTBP1 CTBP2 CTNNB1 CTNNBIP1 CUL1 CXXC4 DAAM1 DAAM2 DKK1 DKK2 DKK4 DVL1 DVL2 DVL3 EP300 FBXW11 FOSL1 FRAT1 FRAT2 FZD1 FZD10 FZD2 FZD3 FZD4 FZD5 FZD6 FZD7 FZD8 FZD9 GSK3B JUN LEF1 LRP5 LRP6 MAP3K7 MAPK10 MAPK8 MAPK9 MMP7 MYC NFAT5 NFATC1 NFATC2 NFATC3 NFATC4 NKD1 NKD2 NLK PLCB1 PLCB2 PLCB3 PLCB4 PORCN PPARD PPP2CA PPP2CB PPP2R1A PPP2R1B PPP2R5A PPP2R5B PPP2R5C PPP2R5D PPP2R5E PPP3CA PPP3CB PPP3CC PPP3R1 PPP3R2 PRICKLE1 PRICKLE2 PRKACA PRKACB PRKACG PRKCA PRKCB PRKCG PRKX PSEN1 RAC1 RAC2 RAC3 RBX1 RHOA ROCK1 ROCK2 RUVBL1 SENP2 SFRP1 SFRP2 SFRP4 SFRP5 SIAH1 SKP1 SMAD2 SMAD3 SMAD4 SOX17 TBL1X TBL1XR1 TBL1Y TCF7 TCF7L1 TCF7L2 TP53 VANGL1 VANGL2 WIF1 WNT1 WNT10A WNT10B WNT11 WNT16 WNT2 WNT2B WNT3 WNT3A WNT4 WNT5A WNT5B WNT6 WNT7A WNT7B WNT8A WNT8B WNT9A WNT9B |
| JAK-STAT signaling pathway | KEGG hsa04630 | AKT1 AKT2 AKT3 BCL2L1 CBL CBLB CBLC CCND1 CCND2 CCND3 CISH CLCF1 CNTF CNTFR CREBBP CRLF2 CSF2 CSF2RA CSF2RB CSF3 CSF3R CSH1 CTF1 EP300 EPO EPOR GH1 GH2 GHR GRB2 IFNA1 IFNA10 IFNA13 IFNA14 IFNA16 IFNA17 IFNA2 IFNA21 IFNA4 IFNA5 IFNA6 IFNA7 IFNA8 IFNAR1 IFNAR2 IFNB1 IFNE IFNG IFNGR1 IFNGR2 IFNK IFNL1 IFNL2 IFNL3 IFNLR1 IFNW1 IL10 IL10RA IL10RB IL11 IL11RA IL12A IL12B IL12RB1 IL12RB2 IL13 IL13RA1 IL13RA2 IL15 IL15RA IL19 IL2 IL20 IL20RA IL20RB IL21 IL21R IL22 IL22RA1 IL22RA2 IL23A IL23R IL24 IL26 IL2RA IL2RB IL2RG IL3 IL3RA IL4 IL4R IL5 IL5RA IL6 IL6R IL6ST IL7 IL7R IL9 IL9R IRF9 JAK1 JAK2 JAK3 LEP LEPR LIF LIFR MPL MYC OSM OSMR PIAS1 PIAS2 PIAS3 PIAS4 PIK3CA PIK3CB PIK3CD PIK3CG PIK3R1 PIK3R2 PIK3R3 PIK3R5 PIM1 PRL PRLR PTPN11 PTPN6 SOCS1 SOCS2 SOCS3 SOCS4 SOCS5 SOCS7 SOS1 SOS2 SPRED1 SPRED2 SPRY1 SPRY2 SPRY3 SPRY4 STAM STAM2 STAT1 STAT2 STAT3 STAT4 STAT5A STAT5B STAT6 TPO TSLP TYK2 |
| MAPK signaling pathway | KEGG hsa04010 | AKT1 AKT2 AKT3 ARRB1 ARRB2 ATF2 ATF4 BDNF BRAF CACNA1A CACNA1B CACNA1C CACNA1D CACNA1E CACNA1F CACNA1G CACNA1H CACNA1I CACNA1S CACNA2D1 CACNA2D2 CACNA2D3 CACNA2D4 CACNB1 CACNB2 CACNB3 CACNB4 CACNG1 CACNG2 CACNG3 CACNG4 CACNG5 CACNG6 CACNG7 CACNG8 CASP3 CD14 CDC25B CDC42 CHP1 CHP2 CHUK CRK CRKL DAXX DDIT3 DUSP1 DUSP10 DUSP14 DUSP16 DUSP2 DUSP3 DUSP4 DUSP5 DUSP6 DUSP7 DUSP8 DUSP9 ECSIT EGF EGFR ELK1 ELK4 FAS FASLG FGF1 FGF10 FGF11 FGF12 FGF13 FGF14 FGF16 FGF17 FGF18 FGF19 FGF2 FGF20 FGF21 FGF22 FGF23 FGF3 FGF4 FGF5 FGF6 FGF7 FGF8 FGF9 FGFR1 FGFR2 FGFR3 FGFR4 FLNA FLNB FLNC FOS GADD45A GADD45B GADD45G GNA12 GNG12 GRB2 HRAS HSPA1A HSPA1B HSPA1L HSPA2 HSPA6 HSPA8 HSPB1 IKBKB IKBKG IL1A IL1B IL1R1 IL1R2 JMJD7-PLA2G4B JUN JUND KRAS LAMTOR3 MAP2K1 MAP2K2 MAP2K3 MAP2K4 MAP2K5 MAP2K6 MAP2K7 MAP3K1 MAP3K11 MAP3K12 MAP3K13 MAP3K14 MAP3K2 MAP3K20 MAP3K3 MAP3K4 MAP3K5 MAP3K6 MAP3K7 MAP3K8 MAP4K1 MAP4K2 MAP4K3 MAP4K4 MAPK1 MAPK10 MAPK11 MAPK12 MAPK13 MAPK14 MAPK3 MAPK7 MAPK8 MAPK8IP1 MAPK8IP2 MAPK8IP3 MAPK9 MAPKAPK2 MAPKAPK3 MAPKAPK5 MAPT MAX MECOM MEF2C MKNK1 MKNK2 MOS MRAS MYC NF1 NFATC2 NFATC4 NFKB1 NFKB2 NGF NLK NR4A1 NRAS NTF3 NTF4 NTRK1 NTRK2 PAK1 PAK2 PDGFA PDGFB PDGFRA PDGFRB PLA2G10 PLA2G12A PLA2G12B PLA2G1B PLA2G2A PLA2G2C PLA2G2D PLA2G2E PLA2G2F PLA2G3 PLA2G4A PLA2G4B PLA2G4E PLA2G5 PLA2G6 PPM1A PPM1B PPP3CA PPP3CB PPP3CC PPP3R1 PPP3R2 PPP5C PRKACA PRKACB PRKACG PRKCA PRKCB PRKCG PRKX PTPN5 PTPN7 PTPRR RAC1 RAC2 RAC3 RAF1 RAP1A RAP1B RAPGEF2 RASA1 RASA2 RASGRF1 RASGRF2 RASGRP1 RASGRP2 RASGRP3 RASGRP4 RELA RELB RPS6KA1 RPS6KA2 RPS6KA3 RPS6KA4 RPS6KA5 RPS6KA6 RRAS RRAS2 SOS1 SOS2 SRF STK3 STK4 STMN1 TAB1 TAB2 TAOK1 TAOK2 TAOK3 TGFB1 TGFB2 TGFB3 TGFBR1 TGFBR2 TNF TNFRSF1A TP53 TRAF2 TRAF6 |
| DNA damage repair | Wood lab | ALKBH2 ALKBH3 APEX1 APEX2 APLF ATM ATR ATRIP BLM BRCA1 BRCA2 BRIP1 CCNH CDK7 CETN2 CHAF1A CHEK1 CHEK2 CLK2 DCLRE1C DDB1 DDB2 DUT ENDOV ERCC1 ERCC2 ERCC3 ERCC4 ERCC5 ERCC6 ERCC8 FAN1 FANCA FANCB FANCC FANCD2 FANCE FANCF FANCG FANCL FANCM GTF2H1 GTF2H2 GTF2H3 GTF2H4 GTF2H5 H2AFX HLTF HUS1 LIG1 LIG3 LIG4 MBD4 MDC1 MGMT MLH1 MLH3 MMS19 MNAT1 MPG MSH2 MSH3 MSH4 MSH5 MSH6 MUTYH NEIL1 NEIL2 NEIL3 NHEJ1 NTHL1 NUDT1 OGG1 PALB2 PARP1 PARP2 PARP3 PCNA PER1 PMS1 PMS2 PNKP POLB POLD1 POLE POLG POLH POLL POLM POLQ PRKDC RAD1 RAD17 RAD18 RAD23A RAD23B RAD51C RAD9A RECQL4 RECQL5 RIF1 RNF168 RNF4 RNF8 RPA1 RPA2 RPA3 RPA4 RRM2B SETMAR SHPRH SMUG1 TDP1 TDP2 TOPBP1 TP53 TREX1 UBE2A UBE2B UBE2N UBE2V2 UNG UVSSA WRN XAB2 XPA XPC XRCC1 XRCC4 XRCC5 XRCC6 |
| EMT1 | PMID: 26997480 | AXL FAP LOXL2 ROR2 TAGLN TWIST2 WNT5A |
| Antigen processing machinery | PMID: 27855702 | B2M HLA-A HLA-B HLA-C TAP1 TAP2 |
| Nucleotide excision repair | KEGG hsa3420 | CCNH CDK7 CETN2 CUL4A CUL4B DDB1 DDB2 ERCC1 ERCC2 ERCC3 ERCC4 ERCC5 ERCC6 ERCC8 GTF2H1 GTF2H2 GTF2H3 GTF2H4 GTF2H5 LIG1 MNAT1 PCNA POLD1 POLD2 POLD3 POLD4 POLE POLE2 POLE3 POLE4 RAD23A RAD23B RBX1 RFC1 RFC2 RFC3 RFC4 RFC5 RPA1 RPA2 RPA3 RPA4 XPA XPC |
| Immune checkpoint | PMID: 29443960 | CD274 CTLA4 HAVCR2 LAG3 PDCD1 PDCD1LG2 TIGIT |
| CD8 T effector | PMID: 26952546 | CD8A CXCL10 CXCL9 GZMA GZMB IFNG PRF1 TBX21 |
| Angiogenesis | PMID: 22553347 | CDH5 SOX17 SOX18 TEK |
| DNA replication | KEGG hsa3030 | DNA2 FEN1 LIG1 MCM2 MCM3 MCM4 MCM5 MCM6 MCM7 PCNA POLA1 POLA2 POLD1 POLD2 POLD3 POLD4 POLE POLE2 POLE3 POLE4 PRIM1 PRIM2 RFC1 RFC2 RFC3 RFC4 RFC5 RNASEH1 RNASEH2A RNASEH2B RNASEH2C RPA1 RPA2 RPA3 RPA4 SSBP1 |
| Mismatch repair | KEGG hsa3430 | EXO1 LIG1 MLH1 MLH3 MSH2 MSH3 MSH6 PCNA PMS2 POLD1 POLD2 POLD3 POLD4 RFC1 RFC2 RFC3 RFC4 RFC5 RPA1 RPA2 RPA3 RPA4 SSBP1 |
| EMT2 | PMID: 27321955 | FOXF1 GATA6 SOX9 TWIST1 ZEB1 ZEB2 |
| Cell cycle | KEGG hsa4110 | ABL1 ANAPC1 ANAPC10 ANAPC11 ANAPC13 ANAPC2 ANAPC4 ANAPC5 ANAPC7 ATM ATR BUB1 BUB1B BUB3 CCNA1 CCNA2 CCNB1 CCNB2 CCNB3 CCND1 CCND2 CCND3 CCNE1 CCNE2 CCNH CDC14A CDC14B CDC16 CDC20 CDC23 CDC25A CDC25B CDC25C CDC26 CDC27 CDC45 CDC6 CDC7 CDK1 CDK2 CDK4 CDK6 CDK7 CDKN1A CDKN1B CDKN1C CDKN2A CDKN2B CDKN2C CDKN2D CHEK1 CHEK2 CREBBP CUL1 DBF4 E2F1 E2F2 E2F3 E2F4 E2F5 EP300 ESPL1 FZR1 GADD45A GADD45B GADD45G GSK3B HDAC1 HDAC2 MAD1L1 MAD2L1 MAD2L2 MCM2 MCM3 MCM4 MCM5 MCM6 MCM7 MDM2 MYC ORC1 ORC2 ORC3 ORC4 ORC5 ORC6 PCNA PKMYT1 PLK1 PRKDC PTTG1 PTTG2 RAD21 RB1 RBL1 RBL2 RBX1 SFN SKP1 SKP2 SMAD2 SMAD3 SMAD4 SMC1A SMC1B SMC3 STAG1 STAG2 TFDP1 TFDP2 TGFB1 TGFB2 TGFB3 TP53 TTK WEE1 YWHAB YWHAE YWHAG YWHAH YWHAQ YWHAZ ZBTB17 |
| Pan-F-TBRS | PMID: 29443960 | ACTA2 ACTG2 ADAM12 ADAM19 CNN1 COL4A1 CTGF CTPS1 FAM101B FSTL3 HSPB1 IGFBP3 PXDC1 SEMA7A SH3PXD2A TAGLN TGFBI TNS1 TPM1 |

**Supplementary Table 5: Correlation between enrichment scores of 21 biological processes and HIscore through Pearsons correlation analysis.**

| **Id** | **R** | **P** |
| --- | --- | --- |
| HIscore | 1 | 0 |
| Base excision repair | -0.73887765 | 1.01E-50 |
| DNA replication | -0.658693801 | 1.95E-36 |
| Cell cycle | -0.629960163 | 2.47E-32 |
| DNA damage repair | -0.576883799 | 8.41E-26 |
| Nucleotide excision repair | -0.568491787 | 7.05E-25 |
| Mismatch repair | -0.564633575 | 1.84E-24 |
| Antigen processing machinery | -0.499581043 | 3.16E-18 |
| Immune checkpoint | -0.267386447 | 0.000215698 |
| Antigen processing and presentation | -0.24220458 | 0.00171417 |
| CD8 T effector | -0.171231768 | 0.143355899 |
| NF-kappa B signaling pathway | -0.038077183 | 1 |
| JAK-STAT signaling pathway | 0.038830825 | 1 |
| MAPK signaling pathway | 0.376694101 | 1.52E-09 |
| Wnt signaling pathway | 0.438918503 | 1.67E-13 |
| PI3K-Akt signaling pathway | 0.521490749 | 3.51E-20 |
| EMT2 | 0.55048214 | 5.29E-23 |
| Angiogenesis | 0.570278386 | 4.52E-25 |
| EMT1 | 0.593215752 | 1.11E-27 |
| TGF-beta signaling pathway | 0.629134632 | 3.17E-32 |
| ECM-receptor interaction | 0.630270989 | 2.25E-32 |
| Pan-F-TBRS | 0.705657661 | 3.24E-44 |

**Supplementary Table 6:Results of enrichment analysis with Metascape.**

| **GO** | **Description** | **LogP** | **Enrichment** | **Log(q-value)** |
| --- | --- | --- | --- | --- |
| GO:0046649 | lymphocyte activation | -61 | 5.7 | -57 |
| GO:0042110 | T cell activation | -54 | 6.8 | -50 |
| R-HSA-1280218 | Adaptive Immune System | -45 | 4.8 | -41 |
| GO:0030098 | lymphocyte differentiation | -44 | 7.2 | -40 |
| GO:0002521 | leukocyte differentiation | -43 | 5.7 | -39 |
| GO:0050865 | regulation of cell activation | -41 | 5 | -37 |
| GO:0007159 | leukocyte cell-cell adhesion | -41 | 6.7 | -37 |
| GO:0002366 | leukocyte activation involved in immune response | -40 | 4.7 | -36 |
| GO:0002253 | activation of immune response | -40 | 4.6 | -36 |
| GO:0002263 | cell activation involved in immune response | -40 | 4.6 | -36 |
| GO:0002694 | regulation of leukocyte activation | -39 | 5.1 | -36 |
| GO:0030155 | regulation of cell adhesion | -39 | 4.6 | -36 |
| GO:0050863 | regulation of T cell activation | -38 | 6.9 | -35 |
| GO:0002764 | immune response-regulating signaling pathway | -36 | 4.5 | -33 |
| GO:0050900 | leukocyte migration | -36 | 5.3 | -32 |
| GO:0002250 | adaptive immune response | -36 | 4.4 | -32 |
| GO:0051249 | regulation of lymphocyte activation | -35 | 5.2 | -32 |
| GO:0002757 | immune response-activating signal transduction | -34 | 4.5 | -31 |
| GO:0030217 | T cell differentiation | -34 | 7.7 | -31 |
| GO:1903037 | regulation of leukocyte cell-cell adhesion | -34 | 6.5 | -31 |
| GO:0022407 | regulation of cell-cell adhesion | -34 | 5.5 | -31 |
| GO:0002274 | myeloid leukocyte activation | -33 | 4.5 | -30 |
| GO:0070661 | leukocyte proliferation | -32 | 6.4 | -29 |
| GO:0046651 | lymphocyte proliferation | -32 | 6.8 | -29 |
| GO:0001817 | regulation of cytokine production | -32 | 4 | -29 |
| GO:0032943 | mononuclear cell proliferation | -32 | 6.7 | -29 |
| GO:0022409 | positive regulation of cell-cell adhesion | -31 | 6.8 | -29 |
| GO:1903039 | positive regulation of leukocyte cell-cell adhesion | -31 | 7.4 | -28 |
| GO:0050867 | positive regulation of cell activation | -30 | 5.4 | -28 |
| GO:0002768 | immune response-regulating cell surface receptor signaling pathway | -29 | 4.7 | -26 |
| R-HSA-198933 | Immunoregulatory interactions between a Lymphoid and a non-Lymphoid cell | -29 | 10 | -26 |
| GO:0031349 | positive regulation of defense response | -29 | 4.6 | -26 |
| GO:0045785 | positive regulation of cell adhesion | -28 | 5.1 | -25 |
| GO:0002696 | positive regulation of leukocyte activation | -28 | 5.3 | -25 |
| GO:0002429 | immune response-activating cell surface receptor signaling pathway | -27 | 4.7 | -24 |
| GO:0050870 | positive regulation of T cell activation | -27 | 7.3 | -24 |
| GO:0070663 | regulation of leukocyte proliferation | -26 | 6.6 | -23 |
| GO:0050670 | regulation of lymphocyte proliferation | -26 | 7 | -23 |
| GO:0032944 | regulation of mononuclear cell proliferation | -26 | 6.9 | -23 |
| GO:0051251 | positive regulation of lymphocyte activation | -25 | 5.3 | -23 |
| GO:0045088 | regulation of innate immune response | -25 | 4.6 | -22 |
| R-HSA-1280215 | Cytokine Signaling in Immune system | -25 | 3.8 | -22 |
| GO:0001819 | positive regulation of cytokine production | -24 | 4.5 | -21 |
| GO:0032103 | positive regulation of response to external stimulus | -24 | 5.3 | -21 |
| GO:0002444 | myeloid leukocyte mediated immunity | -23 | 4.1 | -21 |
| GO:0045619 | regulation of lymphocyte differentiation | -23 | 7.4 | -21 |
| GO:0046631 | alpha-beta T cell activation | -23 | 8.2 | -21 |
| GO:0002285 | lymphocyte activation involved in immune response | -23 | 7.1 | -20 |
| GO:0002275 | myeloid cell activation involved in immune response | -23 | 4.1 | -20 |
| GO:0043299 | leukocyte degranulation | -23 | 4.1 | -20 |
| GO:1902105 | regulation of leukocyte differentiation | -23 | 5.6 | -20 |
| GO:0042098 | T cell proliferation | -23 | 6.9 | -20 |
| R-HSA-109582 | Hemostasis | -22 | 3.8 | -20 |
| GO:0006935 | chemotaxis | -22 | 3.7 | -19 |
| GO:0042330 | taxis | -22 | 3.7 | -19 |
| GO:0050671 | positive regulation of lymphocyte proliferation | -22 | 8.3 | -19 |
| GO:0030595 | leukocyte chemotaxis | -22 | 6.2 | -19 |
| GO:0050851 | antigen receptor-mediated signaling pathway | -22 | 5.2 | -19 |
| GO:0032946 | positive regulation of mononuclear cell proliferation | -22 | 8.2 | -19 |
| GO:0070665 | positive regulation of leukocyte proliferation | -21 | 7.8 | -19 |
| GO:0030335 | positive regulation of cell migration | -21 | 3.9 | -19 |
| GO:0045055 | regulated exocytosis | -21 | 3.4 | -19 |
| GO:0002683 | negative regulation of immune system process | -21 | 4.2 | -19 |
| GO:0045089 | positive regulation of innate immune response | -21 | 4.6 | -19 |
| GO:0002697 | regulation of immune effector process | -21 | 4.2 | -18 |
| GO:0002460 | adaptive immune response based on somatic recombination of immune receptors built from immunoglobulin superfamily domains | -21 | 4.7 | -18 |
| GO:0097529 | myeloid leukocyte migration | -21 | 6.1 | -18 |
| GO:0040017 | positive regulation of locomotion | -20 | 3.7 | -18 |
| GO:0045580 | regulation of T cell differentiation | -20 | 7.6 | -18 |
| GO:0060326 | cell chemotaxis | -20 | 5.1 | -18 |
| GO:2000147 | positive regulation of cell motility | -20 | 3.8 | -18 |
| GO:0051272 | positive regulation of cellular component movement | -20 | 3.7 | -18 |
| R-HSA-449147 | Signaling by Interleukins | -20 | 4.2 | -18 |
| ko04640 | Hematopoietic cell lineage | -20 | 9.6 | -18 |
| hsa04640 | Hematopoietic cell lineage | -20 | 8.7 | -18 |
| ko05150 | Staphylococcus aureus infection | -20 | 13 | -17 |
| GO:0002449 | lymphocyte mediated immunity | -19 | 4.6 | -17 |
| GO:1903706 | regulation of hemopoiesis | -19 | 4 | -17 |
| GO:0050727 | regulation of inflammatory response | -19 | 3.8 | -17 |
| GO:0002685 | regulation of leukocyte migration | -19 | 6.1 | -17 |
| GO:0036230 | granulocyte activation | -19 | 3.9 | -16 |
| ko04659 | Th17 cell differentiation | -19 | 8.7 | -16 |
| GO:0046632 | alpha-beta T cell differentiation | -19 | 8.7 | -16 |
| GO:0042129 | regulation of T cell proliferation | -18 | 6.7 | -16 |
| GO:0002699 | positive regulation of immune effector process | -18 | 5.7 | -16 |
| GO:0002687 | positive regulation of leukocyte migration | -18 | 7.4 | -16 |
| GO:0042119 | neutrophil activation | -18 | 3.8 | -16 |
| ko04380 | Osteoclast differentiation | -18 | 7.6 | -16 |
| hsa04659 | Th17 cell differentiation | -18 | 8.3 | -16 |
| hsa04380 | Osteoclast differentiation | -17 | 7.2 | -15 |
| ko04658 | Th1 and Th2 cell differentiation | -17 | 9.1 | -15 |
| GO:0050852 | T cell receptor signaling pathway | -17 | 5.8 | -15 |
| GO:0002703 | regulation of leukocyte mediated immunity | -17 | 5.7 | -15 |
| GO:0002283 | neutrophil activation involved in immune response | -17 | 3.7 | -15 |
| hsa04658 | Th1 and Th2 cell differentiation | -17 | 8.5 | -14 |
| R-HSA-6798695 | Neutrophil degranulation | -17 | 3.7 | -14 |
| GO:0051345 | positive regulation of hydrolase activity | -17 | 3 | -14 |
| WP69 | T-Cell antigen Receptor (TCR) Signaling Pathway | -17 | 8.9 | -14 |
| GO:0042102 | positive regulation of T cell proliferation | -17 | 8.4 | -14 |
| GO:0002446 | neutrophil mediated immunity | -16 | 3.7 | -14 |
| GO:0043312 | neutrophil degranulation | -16 | 3.7 | -14 |
| GO:0007204 | positive regulation of cytosolic calcium ion concentration | -16 | 4.5 | -14 |
| GO:0046634 | regulation of alpha-beta T cell activation | -16 | 8.2 | -14 |
| GO:0002286 | T cell activation involved in immune response | -16 | 7.8 | -14 |
| GO:0032609 | interferon-gamma production | -16 | 7.7 | -14 |
| GO:0002706 | regulation of lymphocyte mediated immunity | -16 | 6.3 | -13 |
| GO:0002456 | T cell mediated immunity | -16 | 7.9 | -13 |
| hsa05150 | Staphylococcus aureus infection | -16 | 9.2 | -13 |
| GO:0030183 | B cell differentiation | -16 | 6.8 | -13 |
| WP2328 | Allograft Rejection | -15 | 8.5 | -13 |
| GO:0009611 | response to wounding | -15 | 3.1 | -13 |
| GO:0007599 | hemostasis | -15 | 4.2 | -13 |
| WP3937 | Microglia Pathogen Phagocytosis Pathway | -15 | 14 | -13 |
| hsa04062 | Chemokine signaling pathway | -15 | 5.4 | -13 |
| GO:0032496 | response to lipopolysaccharide | -15 | 4.2 | -12 |
| GO:0042113 | B cell activation | -15 | 4.2 | -12 |
| GO:0045058 | T cell selection | -15 | 12 | -12 |
| GO:0007596 | blood coagulation | -15 | 4.1 | -12 |
| M34 | PID TCR PATHWAY | -15 | 10 | -12 |
| GO:0032649 | regulation of interferon-gamma production | -15 | 7.5 | -12 |
| GO:0051480 | regulation of cytosolic calcium ion concentration | -15 | 4.1 | -12 |
| GO:0019882 | antigen processing and presentation | -15 | 4.9 | -12 |
| GO:0002237 | response to molecule of bacterial origin | -15 | 4.1 | -12 |
| GO:0050817 | coagulation | -14 | 4.1 | -12 |
| ko05321 | Inflammatory bowel disease (IBD) | -14 | 9.9 | -12 |
| GO:0032729 | positive regulation of interferon-gamma production | -14 | 9.9 | -12 |
| WP3929 | Chemokine signaling pathway | -14 | 5.9 | -12 |
| GO:0002218 | activation of innate immune response | -14 | 4.1 | -12 |
| ko04650 | Natural killer cell mediated cytotoxicity | -14 | 6.5 | -12 |
| ko04514 | Cell adhesion molecules (CAMs) | -14 | 6.2 | -12 |
| ko04060 | Cytokine-cytokine receptor interaction | -14 | 4.5 | -12 |
| hsa05321 | Inflammatory bowel disease | -14 | 9.6 | -12 |
| hsa04060 | Cytokine-cytokine receptor interaction | -14 | 4.1 | -12 |
| GO:0009617 | response to bacterium | -14 | 2.9 | -12 |
| hsa05140 | Leishmaniasis | -14 | 8.3 | -12 |
| WP3945 | TYROBP Causal Network | -14 | 10 | -12 |
| ko04062 | Chemokine signaling pathway | -14 | 5.5 | -12 |
| GO:0002819 | regulation of adaptive immune response | -14 | 5.7 | -12 |
| GO:0050878 | regulation of body fluid levels | -14 | 3.4 | -12 |
| M54 | PID IL12 2PATHWAY | -14 | 9.8 | -11 |
| GO:0001776 | leukocyte homeostasis | -14 | 8.5 | -11 |
| GO:0043087 | regulation of GTPase activity | -14 | 3.4 | -11 |
| GO:0050729 | positive regulation of inflammatory response | -13 | 5.9 | -11 |
| hsa04514 | Cell adhesion molecules | -13 | 5.9 | -11 |
| GO:0042060 | wound healing | -13 | 3.1 | -11 |
| GO:0033627 | cell adhesion mediated by integrin | -13 | 8.9 | -11 |
| GO:0043367 | CD4-positive, alpha-beta T cell differentiation | -13 | 8.3 | -11 |
| GO:0009615 | response to virus | -13 | 3.8 | -11 |
| GO:0002758 | innate immune response-activating signal transduction | -13 | 4.1 | -11 |
| GO:0002690 | positive regulation of leukocyte chemotaxis | -13 | 7.7 | -11 |
| ko05140 | Leishmaniasis | -13 | 8.8 | -11 |
| GO:0002292 | T cell differentiation involved in immune response | -13 | 8.8 | -11 |
| GO:0043547 | positive regulation of GTPase activity | -13 | 3.6 | -11 |
| GO:0045621 | positive regulation of lymphocyte differentiation | -13 | 7.2 | -11 |
| GO:0071887 | leukocyte apoptotic process | -13 | 7.2 | -11 |
| GO:0071621 | granulocyte chemotaxis | -13 | 6.5 | -11 |
| GO:0001909 | leukocyte mediated cytotoxicity | -13 | 6.7 | -11 |
| GO:0002293 | alpha-beta T cell differentiation involved in immune response | -13 | 9.1 | -11 |
| GO:0002287 | alpha-beta T cell activation involved in immune response | -13 | 9.1 | -11 |
| hsa04650 | Natural killer cell mediated cytotoxicity | -13 | 5.8 | -11 |
| R-HSA-202733 | Cell surface interactions at the vascular wall | -13 | 6.1 | -11 |
| GO:0072507 | divalent inorganic cation homeostasis | -13 | 3.3 | -11 |
| GO:0097530 | granulocyte migration | -13 | 5.8 | -11 |
| GO:0007162 | negative regulation of cell adhesion | -13 | 4.1 | -11 |
| GO:0007264 | small GTPase mediated signal transduction | -13 | 3.3 | -11 |
| GO:0055074 | calcium ion homeostasis | -13 | 3.4 | -11 |
| GO:0050921 | positive regulation of chemotaxis | -13 | 6 | -11 |
| GO:0072676 | lymphocyte migration | -13 | 6.5 | -11 |
| R-HSA-6785807 | Interleukin-4 and Interleukin-13 signaling | -13 | 6.8 | -10 |
| GO:0002708 | positive regulation of lymphocyte mediated immunity | -13 | 6.8 | -10 |
| GO:0006874 | cellular calcium ion homeostasis | -13 | 3.4 | -10 |
| GO:0030003 | cellular cation homeostasis | -12 | 2.9 | -10 |
| GO:0006968 | cellular defense response | -12 | 10 | -10 |
| GO:2000106 | regulation of leukocyte apoptotic process | -12 | 8 | -10 |
| GO:0071216 | cellular response to biotic stimulus | -12 | 4.5 | -10 |
| GO:0072503 | cellular divalent inorganic cation homeostasis | -12 | 3.3 | -10 |
| GO:0001906 | cell killing | -12 | 5.1 | -10 |
| R-HSA-76002 | Platelet activation, signaling and aggregation | -12 | 4.3 | -10 |
| GO:0002695 | negative regulation of leukocyte activation | -12 | 5.1 | -10 |
| R-HSA-202433 | Generation of second messenger molecules | -12 | 13 | -10 |
| GO:0048872 | homeostasis of number of cells | -12 | 4.4 | -10 |
| GO:0002700 | regulation of production of molecular mediator of immune response | -12 | 5.7 | -10 |
| GO:0034341 | response to interferon-gamma | -12 | 4.9 | -10 |
| GO:0043900 | regulation of multi-organism process | -12 | 3.4 | -10 |
| GO:0006873 | cellular ion homeostasis | -12 | 2.8 | -10 |
| GO:0030593 | neutrophil chemotaxis | -12 | 6.8 | -10 |
| GO:0043062 | extracellular structure organization | -12 | 3.3 | -9.9 |
| GO:0050866 | negative regulation of cell activation | -12 | 4.8 | -9.9 |
| GO:0002294 | CD4-positive, alpha-beta T cell differentiation involved in immune response | -12 | 8.7 | -9.9 |
| R-HSA-216083 | Integrin cell surface interactions | -12 | 7.5 | -9.8 |
| GO:0046637 | regulation of alpha-beta T cell differentiation | -12 | 8.6 | -9.8 |
| GO:0043368 | positive T cell selection | -12 | 12 | -9.7 |
| ko04940 | Type I diabetes mellitus | -12 | 11 | -9.7 |
| GO:0006909 | phagocytosis | -12 | 3.5 | -9.7 |
| ko04145 | Phagosome | -12 | 5.4 | -9.6 |
| GO:0006875 | cellular metal ion homeostasis | -12 | 3 | -9.6 |
| GO:0002688 | regulation of leukocyte chemotaxis | -12 | 6.2 | -9.6 |
| M88 | PID CD8 TCR PATHWAY | -12 | 9.9 | -9.5 |
| GO:0002822 | regulation of adaptive immune response based on somatic recombination of immune receptors built from immunoglobulin superfamily domains | -12 | 5.4 | -9.5 |
| GO:0031341 | regulation of cell killing | -12 | 6.8 | -9.5 |
| GO:0002577 | regulation of antigen processing and presentation | -11 | 18 | -9.4 |
| GO:0055080 | cation homeostasis | -11 | 2.7 | -9.4 |
| GO:0071219 | cellular response to molecule of bacterial origin | -11 | 4.6 | -9.4 |
| GO:0043410 | positive regulation of MAPK cascade | -11 | 3 | -9.4 |
| GO:0035710 | CD4-positive, alpha-beta T cell activation | -11 | 6.7 | -9.4 |
| GO:1902107 | positive regulation of leukocyte differentiation | -11 | 5.3 | -9.3 |
| M5885 | NABA MATRISOME ASSOCIATED | -11 | 2.6 | -9.3 |
| GO:0002705 | positive regulation of leukocyte mediated immunity | -11 | 5.7 | -9.3 |
| GO:0071222 | cellular response to lipopolysaccharide | -11 | 4.7 | -9.3 |
| GO:0031589 | cell-substrate adhesion | -11 | 3.6 | -9.3 |
| GO:0002221 | pattern recognition receptor signaling pathway | -11 | 4.6 | -9.3 |
| GO:0019722 | calcium-mediated signaling | -11 | 4.5 | -9.3 |
| GO:0018212 | peptidyl-tyrosine modification | -11 | 3.5 | -9.3 |
| GO:1990266 | neutrophil migration | -11 | 5.9 | -9.2 |
| GO:0150076 | neuroinflammatory response | -11 | 8 | -9.2 |
| GO:0098771 | inorganic ion homeostasis | -11 | 2.6 | -9.2 |
| hsa04940 | Type I diabetes mellitus | -11 | 10 | -9.1 |
| ko04660 | T cell receptor signaling pathway | -11 | 6.5 | -9.1 |
| WP4754 | IL-18 signaling pathway | -11 | 4 | -9.1 |
| GO:0071674 | mononuclear cell migration | -11 | 6.8 | -9 |
| GO:0071346 | cellular response to interferon-gamma | -11 | 4.9 | -9 |
| ko05332 | Graft-versus-host disease | -11 | 11 | -8.9 |
| GO:0046635 | positive regulation of alpha-beta T cell activation | -11 | 8.3 | -8.9 |
| ko05144 | Malaria | -11 | 9.8 | -8.9 |
| GO:0050731 | positive regulation of peptidyl-tyrosine phosphorylation | -11 | 4.6 | -8.8 |
| GO:0042100 | B cell proliferation | -11 | 6.7 | -8.8 |
| GO:0018108 | peptidyl-tyrosine phosphorylation | -11 | 3.4 | -8.8 |
| hsa04145 | Phagosome | -11 | 5 | -8.8 |
| WP2806 | Human Complement System | -11 | 6.6 | -8.8 |
| WP23 | B Cell Receptor Signaling Pathway | -11 | 6.6 | -8.8 |
| GO:0019932 | second-messenger-mediated signaling | -11 | 3.2 | -8.7 |
| R-HSA-202403 | TCR signaling | -11 | 5.9 | -8.7 |
| GO:0055065 | metal ion homeostasis | -11 | 2.7 | -8.7 |
| GO:0007169 | transmembrane receptor protein tyrosine kinase signaling pathway | -11 | 2.6 | -8.7 |
| GO:0043370 | regulation of CD4-positive, alpha-beta T cell differentiation | -11 | 9.4 | -8.6 |
| GO:0001818 | negative regulation of cytokine production | -11 | 3.4 | -8.6 |
| GO:0072358 | cardiovascular system development | -11 | 2.5 | -8.6 |
| GO:0001944 | vasculature development | -11 | 2.5 | -8.6 |
| WP3932 | Focal Adhesion-PI3K-Akt-mTOR-signaling pathway | -10 | 3.7 | -8.5 |
| ko05323 | Rheumatoid arthritis | -10 | 6.8 | -8.5 |
| GO:0045582 | positive regulation of T cell differentiation | -10 | 6.8 | -8.5 |
| hsa04660 | T cell receptor signaling pathway | -10 | 6 | -8.4 |
| GO:0045123 | cellular extravasation | -10 | 7.7 | -8.4 |
| GO:0033674 | positive regulation of kinase activity | -10 | 2.8 | -8.3 |
| ko05330 | Allograft rejection | -10 | 11 | -8.2 |
| GO:0031343 | positive regulation of cell killing | -10 | 8.1 | -8.2 |
| GO:2000107 | negative regulation of leukocyte apoptotic process | -10 | 9.8 | -8.2 |
| hsa05332 | Graft-versus-host disease | -10 | 9.8 | -8.2 |
| GO:0010942 | positive regulation of cell death | -10 | 2.6 | -8.2 |
| ko05152 | Tuberculosis | -10 | 4.7 | -8.2 |
| GO:0030198 | extracellular matrix organization | -10 | 3.2 | -8.1 |
| GO:0002367 | cytokine production involved in immune response | -10 | 6.5 | -8.1 |
| GO:0072593 | reactive oxygen species metabolic process | -10 | 3.7 | -8.1 |
| GO:0045576 | mast cell activation | -10 | 8 | -8.1 |
| GO:0042093 | T-helper cell differentiation | -10 | 8 | -8.1 |
| hsa05144 | Malaria | -10 | 8.7 | -8.1 |
| WP4217 | Ebola Virus Pathway on Host | -10 | 5.5 | -8.1 |
| GO:0002269 | leukocyte activation involved in inflammatory response | -10 | 9.5 | -8.1 |
| R-HSA-6783783 | Interleukin-10 signaling | -10 | 9.5 | -8.1 |
| GO:0001774 | microglial cell activation | -10 | 9.5 | -8.1 |
| GO:0050920 | regulation of chemotaxis | -10 | 4.1 | -8 |
| GO:0033628 | regulation of cell adhesion mediated by integrin | -9.9 | 9.3 | -7.9 |
| GO:0050854 | regulation of antigen receptor-mediated signaling pathway | -9.9 | 7.8 | -7.9 |
| GO:0002440 | production of molecular mediator of immune response | -9.8 | 3.7 | -7.9 |
| GO:0002260 | lymphocyte homeostasis | -9.8 | 8.4 | -7.9 |
| GO:0043408 | regulation of MAPK cascade | -9.8 | 2.5 | -7.9 |
| GO:0002821 | positive regulation of adaptive immune response | -9.8 | 5.9 | -7.9 |
| GO:0032760 | positive regulation of tumor necrosis factor production | -9.8 | 6.6 | -7.8 |
| hsa04670 | Leukocyte transendothelial migration | -9.8 | 5.6 | -7.8 |
| GO:0051347 | positive regulation of transferase activity | -9.8 | 2.6 | -7.8 |
| GO:0045860 | positive regulation of protein kinase activity | -9.7 | 2.8 | -7.8 |
| ko04672 | Intestinal immune network for IgA production | -9.7 | 9.2 | -7.8 |
| GO:0002224 | toll-like receptor signaling pathway | -9.7 | 4.8 | -7.8 |
| GO:0032680 | regulation of tumor necrosis factor production | -9.7 | 4.8 | -7.8 |
| hsa05323 | Rheumatoid arthritis | -9.7 | 6.1 | -7.8 |
| GO:0002228 | natural killer cell mediated immunity | -9.6 | 7.5 | -7.7 |
| GO:0031348 | negative regulation of defense response | -9.6 | 3.8 | -7.7 |
| GO:0032640 | tumor necrosis factor production | -9.6 | 4.7 | -7.7 |
| GO:0001910 | regulation of leukocyte mediated cytotoxicity | -9.5 | 6.9 | -7.6 |
| GO:1903557 | positive regulation of tumor necrosis factor superfamily cytokine production | -9.5 | 6.4 | -7.6 |
| GO:0001568 | blood vessel development | -9.5 | 2.5 | -7.6 |
| GO:0032655 | regulation of interleukin-12 production | -9.5 | 8 | -7.6 |
| GO:0032615 | interleukin-12 production | -9.5 | 8 | -7.6 |
| R-HSA-114604 | GPVI-mediated activation cascade | -9.5 | 11 | -7.6 |
| hsa05152 | Tuberculosis | -9.4 | 4.3 | -7.5 |
| GO:0042116 | macrophage activation | -9.4 | 6 | -7.5 |
| R-HSA-9658195 | Leishmania infection | -9.4 | 3.8 | -7.5 |
| hsa05416 | Viral myocarditis | -9.4 | 7.3 | -7.5 |
| ko04670 | Leukocyte transendothelial migration | -9.4 | 5.6 | -7.5 |
| GO:1903555 | regulation of tumor necrosis factor superfamily cytokine production | -9.4 | 4.7 | -7.5 |
| GO:0030888 | regulation of B cell proliferation | -9.4 | 7.9 | -7.5 |
| GO:0051250 | negative regulation of lymphocyte activation | -9.3 | 4.8 | -7.4 |
| R-HSA-1474244 | Extracellular matrix organization | -9.3 | 3.5 | -7.4 |
| GO:0002824 | positive regulation of adaptive immune response based on somatic recombination of immune receptors built from immunoglobulin superfamily domains | -9.3 | 5.9 | -7.4 |
| GO:0046718 | viral entry into host cell | -9.3 | 5 | -7.4 |
| M169 | PID INTEGRIN2 PATHWAY | -9.3 | 12 | -7.4 |
| GO:0071706 | tumor necrosis factor superfamily cytokine production | -9.3 | 4.6 | -7.4 |
| ko05166 | HTLV-I infection | -9.2 | 3.8 | -7.4 |
| M9526 | ST T CELL SIGNAL TRANSDUCTION | -9.2 | 9.3 | -7.3 |
| GO:0072511 | divalent inorganic cation transport | -9.1 | 2.9 | -7.2 |
| GO:0002718 | regulation of cytokine production involved in immune response | -9.1 | 6.5 | -7.2 |
| GO:0030101 | natural killer cell activation | -9 | 6.4 | -7.1 |
| GO:0001912 | positive regulation of leukocyte mediated cytotoxicity | -9 | 8.2 | -7.1 |
| GO:0061900 | glial cell activation | -9 | 8.2 | -7.1 |
| GO:0050730 | regulation of peptidyl-tyrosine phosphorylation | -9 | 3.7 | -7.1 |
| M272 | PID CD8 TCR DOWNSTREAM PATHWAY | -9 | 7.4 | -7.1 |
| GO:0050853 | B cell receptor signaling pathway | -8.9 | 5 | -7.1 |
| hsa05330 | Allograft rejection | -8.9 | 8.9 | -7 |
| GO:1903708 | positive regulation of hemopoiesis | -8.9 | 4.1 | -7 |
| M18 | PID INTEGRIN1 PATHWAY | -8.9 | 7.3 | -7 |
| GO:0072678 | T cell migration | -8.9 | 7.3 | -7 |
| GO:0002573 | myeloid leukocyte differentiation | -8.8 | 4.1 | -7 |
| GO:0019058 | viral life cycle | -8.8 | 3.2 | -6.9 |
| GO:2000514 | regulation of CD4-positive, alpha-beta T cell activation | -8.8 | 7.2 | -6.9 |
| GO:0070838 | divalent metal ion transport | -8.7 | 2.9 | -6.9 |
| GO:0002709 | regulation of T cell mediated immunity | -8.7 | 6.6 | -6.8 |
| GO:1903038 | negative regulation of leukocyte cell-cell adhesion | -8.7 | 4.9 | -6.8 |
| GO:0031663 | lipopolysaccharide-mediated signaling pathway | -8.7 | 7.7 | -6.8 |
| ko05145 | Toxoplasmosis | -8.7 | 5.4 | -6.8 |
| GO:0072540 | T-helper 17 cell lineage commitment | -8.7 | 18 | -6.8 |
| GO:0098542 | defense response to other organism | -8.6 | 2.6 | -6.8 |
| GO:0002312 | B cell activation involved in immune response | -8.6 | 6.5 | -6.8 |
| GO:0045807 | positive regulation of endocytosis | -8.6 | 4.6 | -6.7 |
| ko05142 | Chagas disease (American trypanosomiasis) | -8.6 | 5.7 | -6.7 |
| hsa04672 | Intestinal immune network for IgA production | -8.6 | 7.6 | -6.7 |
| R-HSA-388841 | Costimulation by the CD28 family | -8.6 | 7 | -6.7 |
| GO:0002548 | monocyte chemotaxis | -8.6 | 7 | -6.7 |
| M36 | PID IL27 PATHWAY | -8.6 | 12 | -6.7 |
| GO:0046427 | positive regulation of JAK-STAT cascade | -8.5 | 6 | -6.7 |
| GO:0030260 | entry into host cell | -8.5 | 4.6 | -6.7 |
| GO:0044409 | entry into host | -8.5 | 4.6 | -6.7 |
| GO:0051806 | entry into cell of other organism involved in symbiotic interaction | -8.5 | 4.6 | -6.7 |
| GO:0001913 | T cell mediated cytotoxicity | -8.5 | 8.3 | -6.7 |
| GO:0051828 | entry into other organism involved in symbiotic interaction | -8.5 | 4.5 | -6.6 |
| hsa04015 | Rap1 signaling pathway | -8.5 | 3.8 | -6.6 |
| hsa05145 | Toxoplasmosis | -8.5 | 5.2 | -6.6 |
| GO:0051607 | defense response to virus | -8.5 | 3.6 | -6.6 |
| GO:0019884 | antigen processing and presentation of exogenous antigen | -8.4 | 4.2 | -6.6 |
| ko05168 | Herpes simplex infection | -8.4 | 4.2 | -6.6 |
| GO:0034113 | heterotypic cell-cell adhesion | -8.4 | 7.4 | -6.5 |
| WP3863 | T-Cell antigen Receptor (TCR) pathway during Staphylococcus aureus infection | -8.4 | 7.4 | -6.5 |
| hsa05166 | Human T-cell leukemia virus 1 infection | -8.4 | 3.4 | -6.5 |
| GO:0007160 | cell-matrix adhesion | -8.4 | 3.7 | -6.5 |
| GO:0002468 | dendritic cell antigen processing and presentation | -8.3 | 17 | -6.5 |
| hsa05162 | Measles | -8.3 | 4.5 | -6.5 |
| GO:0006959 | humoral immune response | -8.3 | 3 | -6.5 |
| GO:1904894 | positive regulation of STAT cascade | -8.3 | 5.8 | -6.5 |
| GO:0070227 | lymphocyte apoptotic process | -8.3 | 6.7 | -6.5 |
| ko05164 | Influenza A | -8.3 | 4.3 | -6.5 |
| GO:0050868 | negative regulation of T cell activation | -8.3 | 5.1 | -6.5 |
| GO:0043068 | positive regulation of programmed cell death | -8.3 | 2.4 | -6.4 |
| GO:0002363 | alpha-beta T cell lineage commitment | -8.2 | 14 | -6.4 |
| hsa05142 | Chagas disease | -8.2 | 5.4 | -6.4 |
| ko04064 | NF-kappa B signaling pathway | -8.2 | 5.7 | -6.4 |
| GO:0030099 | myeloid cell differentiation | -8.2 | 2.9 | -6.4 |
| hsa05169 | Epstein-Barr virus infection | -8.2 | 3.3 | -6.4 |
| GO:0022408 | negative regulation of cell-cell adhesion | -8.2 | 4.1 | -6.4 |
| GO:0033077 | T cell differentiation in thymus | -8.2 | 6.6 | -6.4 |
| R-HSA-418594 | G alpha (i) signalling events | -8.2 | 2.9 | -6.4 |
| ko05162 | Measles | -8.2 | 4.8 | -6.4 |
| GO:0070228 | regulation of lymphocyte apoptotic process | -8.1 | 7.7 | -6.3 |
| GO:0002604 | regulation of dendritic cell antigen processing and presentation | -8.1 | 20 | -6.3 |
| GO:0006816 | calcium ion transport | -8.1 | 2.9 | -6.3 |
| GO:0043369 | CD4-positive or CD8-positive, alpha-beta T cell lineage commitment | -8 | 13 | -6.2 |
| R-HSA-202427 | Phosphorylation of CD3 and TCR zeta chains | -8 | 13 | -6.2 |
| WP4494 | Selective expression of chemokine receptors during T-cell polarization | -8 | 11 | -6.2 |
| GO:0036336 | dendritic cell migration | -8 | 11 | -6.2 |
| GO:0043065 | positive regulation of apoptotic process | -8 | 2.4 | -6.2 |
| GO:0048771 | tissue remodeling | -8 | 4.1 | -6.2 |
| GO:0048002 | antigen processing and presentation of peptide antigen | -8 | 4 | -6.2 |
| GO:0042267 | natural killer cell mediated cytotoxicity | -8 | 6.9 | -6.2 |
| WP2849 | Hematopoietic Stem Cell Differentiation | -8 | 6.9 | -6.2 |
| ko04015 | Rap1 signaling pathway | -7.9 | 3.8 | -6.2 |
| hsa04014 | Ras signaling pathway | -7.9 | 3.5 | -6.1 |
| ko04612 | Antigen processing and presentation | -7.9 | 6.2 | -6.1 |
| GO:0001525 | angiogenesis | -7.9 | 2.5 | -6.1 |
| hsa05164 | Influenza A | -7.9 | 4 | -6.1 |
| hsa04151 | PI3K-Akt signaling pathway | -7.9 | 3 | -6.1 |
| GO:0032102 | negative regulation of response to external stimulus | -7.8 | 2.9 | -6 |
| GO:0014066 | regulation of phosphatidylinositol 3-kinase signaling | -7.8 | 4.8 | -6 |
| GO:0002295 | T-helper cell lineage commitment | -7.8 | 15 | -6 |
| WP4493 | Cells and Molecules involved in local acute inflammatory response | -7.8 | 15 | -6 |
| WP4462 | Platelet-mediated interactions with vascular and circulating cells | -7.8 | 15 | -6 |
| GO:0043551 | regulation of phosphatidylinositol 3-kinase activity | -7.8 | 7.3 | -6 |
| R-HSA-168898 | Toll-like Receptor Cascades | -7.8 | 4.3 | -6 |
| ko04610 | Complement and coagulation cascades | -7.7 | 6.1 | -5.9 |
| GO:0001768 | establishment of T cell polarity | -7.7 | 19 | -5.9 |
| GO:0002715 | regulation of natural killer cell mediated immunity | -7.7 | 8 | -5.9 |
| GO:0002717 | positive regulation of natural killer cell mediated immunity | -7.7 | 10 | -5.9 |
| hsa04610 | Complement and coagulation cascades | -7.7 | 5.6 | -5.9 |
| GO:0048514 | blood vessel morphogenesis | -7.7 | 2.4 | -5.9 |
| GO:0002407 | dendritic cell chemotaxis | -7.6 | 12 | -5.9 |
| GO:0032675 | regulation of interleukin-6 production | -7.6 | 4.3 | -5.9 |
| GO:0030168 | platelet activation | -7.6 | 4.3 | -5.9 |
| GO:0030890 | positive regulation of B cell proliferation | -7.6 | 8.8 | -5.8 |
| R-HSA-380108 | Chemokine receptors bind chemokines | -7.6 | 7.1 | -5.8 |
| GO:0050777 | negative regulation of immune response | -7.6 | 4.2 | -5.8 |
| hsa04662 | B cell receptor signaling pathway | -7.6 | 5.9 | -5.8 |
| GO:0042531 | positive regulation of tyrosine phosphorylation of STAT protein | -7.5 | 6.4 | -5.8 |
| WP3893 | Development and heterogeneity of the ILC family | -7.5 | 10 | -5.8 |
| M290 | PID IL12 STAT4 PATHWAY | -7.5 | 10 | -5.8 |
| R-HSA-9006934 | Signaling by Receptor Tyrosine Kinases | -7.5 | 2.6 | -5.8 |
| M7 | PID FCER1 PATHWAY | -7.5 | 6.9 | -5.7 |
| hsa04612 | Antigen processing and presentation | -7.5 | 5.9 | -5.7 |
| ko04662 | B cell receptor signaling pathway | -7.5 | 6.3 | -5.7 |
| WP4172 | PI3K-Akt Signaling Pathway | -7.5 | 3 | -5.7 |
| hsa04064 | NF-kappa B signaling pathway | -7.4 | 5.1 | -5.7 |
| GO:0038093 | Fc receptor signaling pathway | -7.4 | 3.5 | -5.7 |
| GO:0032635 | interleukin-6 production | -7.4 | 4.2 | -5.7 |
| GO:0048015 | phosphatidylinositol-mediated signaling | -7.4 | 3.8 | -5.7 |
| GO:0002478 | antigen processing and presentation of exogenous peptide antigen | -7.4 | 4 | -5.7 |
| R-HSA-2871809 | FCERI mediated Ca+2 mobilization | -7.4 | 9.7 | -5.7 |
| GO:0001767 | establishment of lymphocyte polarity | -7.4 | 17 | -5.6 |
| GO:0070486 | leukocyte aggregation | -7.4 | 17 | -5.6 |
| GO:0051701 | interaction with host | -7.4 | 3.6 | -5.6 |
| GO:0050864 | regulation of B cell activation | -7.4 | 3.8 | -5.6 |
| GO:0007259 | JAK-STAT cascade | -7.3 | 4.1 | -5.6 |
| R-HSA-202430 | Translocation of ZAP-70 to Immunological synapse | -7.3 | 13 | -5.6 |
| GO:0070371 | ERK1 and ERK2 cascade | -7.3 | 3 | -5.6 |
| GO:0002711 | positive regulation of T cell mediated immunity | -7.3 | 7.4 | -5.5 |
| GO:0045954 | positive regulation of natural killer cell mediated cytotoxicity | -7.3 | 11 | -5.5 |
| GO:1990868 | response to chemokine | -7.3 | 5.3 | -5.5 |
| GO:1990869 | cellular response to chemokine | -7.3 | 5.3 | -5.5 |
| hsa05200 | Pathways in cancer | -7.2 | 2.4 | -5.5 |
| GO:0048017 | inositol lipid-mediated signaling | -7.2 | 3.8 | -5.5 |
| GO:0060402 | calcium ion transport into cytosol | -7.2 | 4.2 | -5.5 |
| GO:0032755 | positive regulation of interleukin-6 production | -7.2 | 5.6 | -5.5 |
| hsa05170 | human immunodeficiency virus 1 infection | -7.2 | 3.5 | -5.5 |
| GO:0002704 | negative regulation of leukocyte mediated immunity | -7.2 | 7.3 | -5.5 |
| GO:0071356 | cellular response to tumor necrosis factor | -7.2 | 3.1 | -5.4 |
| GO:0002578 | negative regulation of antigen processing and presentation | -7.2 | 21 | -5.4 |
| WP306 | Focal Adhesion | -7.1 | 3.7 | -5.4 |
| GO:0002360 | T cell lineage commitment | -7.1 | 11 | -5.4 |
| hsa04510 | Focal adhesion | -7.1 | 3.6 | -5.4 |
| GO:0014065 | phosphatidylinositol 3-kinase signaling | -7.1 | 4.2 | -5.4 |
| WP4223 | Ras Signaling | -7.1 | 3.8 | -5.4 |
| GO:0043373 | CD4-positive, alpha-beta T cell lineage commitment | -7.1 | 13 | -5.4 |
| GO:0001771 | immunological synapse formation | -7.1 | 16 | -5.4 |
| GO:0061756 | leukocyte adhesion to vascular endothelial cell | -7.1 | 7.1 | -5.4 |
| GO:0007249 | I-kappaB kinase/NF-kappaB signaling | -7.1 | 3.2 | -5.4 |
| GO:0002702 | positive regulation of production of molecular mediator of immune response | -7.1 | 5.1 | -5.4 |
| R-HSA-373076 | Class A/1 (Rhodopsin-like receptors) | -7.1 | 3 | -5.4 |
| R-HSA-194315 | Signaling by Rho GTPases | -7.1 | 2.6 | -5.3 |
| GO:0070098 | chemokine-mediated signaling pathway | -7.1 | 5.5 | -5.3 |
| GO:0019216 | regulation of lipid metabolic process | -7.1 | 2.7 | -5.3 |
| R-HSA-375276 | Peptide ligand-binding receptors | -7 | 3.7 | -5.3 |
| GO:0051235 | maintenance of location | -7 | 3 | -5.3 |
| GO:0030100 | regulation of endocytosis | -7 | 3.1 | -5.3 |
| GO:0007260 | tyrosine phosphorylation of STAT protein | -7 | 5.4 | -5.3 |
| GO:0007265 | Ras protein signal transduction | -7 | 2.9 | -5.3 |
| GO:0097696 | STAT cascade | -6.9 | 3.9 | -5.2 |
| GO:0014068 | positive regulation of phosphatidylinositol 3-kinase signaling | -6.9 | 5.3 | -5.2 |
| GO:0034121 | regulation of toll-like receptor signaling pathway | -6.9 | 5.8 | -5.2 |
| GO:0046641 | positive regulation of alpha-beta T cell proliferation | -6.9 | 12 | -5.2 |
| GO:0046425 | regulation of JAK-STAT cascade | -6.9 | 4.2 | -5.2 |
| GO:0050766 | positive regulation of phagocytosis | -6.9 | 6.2 | -5.2 |
| GO:2000403 | positive regulation of lymphocyte migration | -6.9 | 8.7 | -5.2 |
| ko05340 | Primary immunodeficiency | -6.9 | 8.7 | -5.2 |
| GO:0046633 | alpha-beta T cell proliferation | -6.9 | 8.7 | -5.2 |
| WP1449 | Regulation of toll-like receptor signaling pathway | -6.9 | 4.2 | -5.2 |
| GO:0051897 | positive regulation of protein kinase B signaling | -6.8 | 3.8 | -5.1 |
| GO:0043491 | protein kinase B signaling | -6.8 | 3.2 | -5.1 |
| GO:0050690 | regulation of defense response to virus by virus | -6.8 | 9.9 | -5.1 |
| GO:0072539 | T-helper 17 cell differentiation | -6.8 | 9.9 | -5.1 |
| ko04664 | Fc epsilon RI signaling pathway | -6.8 | 6.1 | -5.1 |
| hsa04664 | Fc epsilon RI signaling pathway | -6.8 | 5.6 | -5.1 |
| GO:2000377 | regulation of reactive oxygen species metabolic process | -6.7 | 3.7 | -5 |
| GO:0043550 | regulation of lipid kinase activity | -6.7 | 6 | -5 |
| WP4884 | Pathogenesis of SARS-CoV-2 Mediated by nsp9-nsp10 Complex | -6.7 | 12 | -5 |
| GO:0045061 | thymic T cell selection | -6.7 | 12 | -5 |
| GO:0035590 | purinergic nucleotide receptor signaling pathway | -6.7 | 12 | -5 |
| R-HSA-2454202 | Fc epsilon receptor (FCERI) signaling | -6.7 | 4.3 | -5 |
| GO:0050858 | negative regulation of antigen receptor-mediated signaling pathway | -6.7 | 9.6 | -5 |
| GO:0050901 | leukocyte tethering or rolling | -6.7 | 9.6 | -5 |
| GO:0050792 | regulation of viral process | -6.7 | 3.4 | -5 |
| GO:0051090 | regulation of DNA-binding transcription factor activity | -6.7 | 2.6 | -5 |
| GO:0045834 | positive regulation of lipid metabolic process | -6.6 | 4.1 | -4.9 |
| GO:1903725 | regulation of phospholipid metabolic process | -6.6 | 5.1 | -4.9 |
| GO:0046638 | positive regulation of alpha-beta T cell differentiation | -6.6 | 7.2 | -4.9 |
| GO:0071622 | regulation of granulocyte chemotaxis | -6.6 | 7.2 | -4.9 |
| GO:1901652 | response to peptide | -6.6 | 2.4 | -4.9 |
| GO:1901699 | cellular response to nitrogen compound | -6.6 | 2.3 | -4.9 |
| GO:0048010 | vascular endothelial growth factor receptor signaling pathway | -6.5 | 5 | -4.9 |
| GO:0070229 | negative regulation of lymphocyte apoptotic process | -6.5 | 9.3 | -4.9 |
| GO:0002335 | mature B cell differentiation | -6.5 | 9.3 | -4.9 |
| GO:0002831 | regulation of response to biotic stimulus | -6.5 | 4 | -4.9 |
| GO:1904892 | regulation of STAT cascade | -6.5 | 4 | -4.9 |
| GO:0032735 | positive regulation of interleukin-12 production | -6.5 | 8 | -4.9 |
| GO:0050856 | regulation of T cell receptor signaling pathway | -6.5 | 8 | -4.9 |
| ko04510 | Focal adhesion | -6.5 | 3.5 | -4.8 |
| GO:0060401 | cytosolic calcium ion transport | -6.5 | 3.8 | -4.8 |
| GO:0050764 | regulation of phagocytosis | -6.5 | 5 | -4.8 |
| GO:0051056 | regulation of small GTPase mediated signal transduction | -6.5 | 2.9 | -4.8 |
| GO:0034612 | response to tumor necrosis factor | -6.4 | 2.9 | -4.8 |
| R-HSA-2029480 | Fcgamma receptor (FCGR) dependent phagocytosis | -6.4 | 5.3 | -4.8 |
| M159 | PID AMB2 NEUTROPHILS PATHWAY | -6.4 | 7.8 | -4.7 |
| hsa05310 | Asthma | -6.4 | 7.8 | -4.7 |
| GO:0035587 | purinergic receptor signaling pathway | -6.4 | 9 | -4.7 |
| GO:0043372 | positive regulation of CD4-positive, alpha-beta T cell differentiation | -6.4 | 9 | -4.7 |
| GO:0050728 | negative regulation of inflammatory response | -6.4 | 3.6 | -4.7 |
| GO:1905523 | positive regulation of macrophage migration | -6.4 | 11 | -4.7 |
| GO:0042509 | regulation of tyrosine phosphorylation of STAT protein | -6.4 | 5.2 | -4.7 |
| WP4298 | Viral Acute Myocarditis | -6.4 | 5.2 | -4.7 |
| ko04151 | PI3K-Akt signaling pathway | -6.4 | 2.8 | -4.7 |
| GO:0014015 | positive regulation of gliogenesis | -6.4 | 5.6 | -4.7 |
| GO:0002526 | acute inflammatory response | -6.3 | 3.3 | -4.7 |
| GO:0070372 | regulation of ERK1 and ERK2 cascade | -6.3 | 2.9 | -4.7 |
| M10 | PID BCR 5PATHWAY | -6.3 | 6.1 | -4.7 |
| GO:0051924 | regulation of calcium ion transport | -6.3 | 3.2 | -4.6 |
| GO:0072538 | T-helper 17 type immune response | -6.3 | 8.7 | -4.6 |
| GO:0043552 | positive regulation of phosphatidylinositol 3-kinase activity | -6.3 | 8.7 | -4.6 |
| GO:0045589 | regulation of regulatory T cell differentiation | -6.3 | 8.7 | -4.6 |
| M277 | PID INTEGRIN A4B1 PATHWAY | -6.3 | 8.7 | -4.6 |
| GO:0060759 | regulation of response to cytokine stimulus | -6.3 | 3.6 | -4.6 |
| GO:0070555 | response to interleukin-1 | -6.2 | 3.4 | -4.6 |
| GO:0032732 | positive regulation of interleukin-1 production | -6.2 | 6 | -4.6 |
| ko05320 | Autoimmune thyroid disease | -6.2 | 6.7 | -4.6 |
| hsa05163 | human cytomegalovirus infection | -6.2 | 3.2 | -4.6 |
| GO:0071417 | cellular response to organonitrogen compound | -6.2 | 2.3 | -4.6 |
| M5884 | NABA CORE MATRISOME | -6.2 | 3 | -4.6 |
| hsa04611 | Platelet activation | -6.2 | 4.2 | -4.5 |
| GO:0046849 | bone remodeling | -6.2 | 5 | -4.5 |
| GO:0051962 | positive regulation of nervous system development | -6.2 | 2.4 | -4.5 |
| GO:0043903 | regulation of symbiosis, encompassing mutualism through parasitism | -6.2 | 3.2 | -4.5 |
| GO:0046640 | regulation of alpha-beta T cell proliferation | -6.2 | 8.5 | -4.5 |
| GO:1904645 | response to amyloid-beta | -6.1 | 6.5 | -4.5 |
| WP75 | Toll-like Receptor Signaling Pathway | -6.1 | 4.7 | -4.5 |
| GO:0001959 | regulation of cytokine-mediated signaling pathway | -6.1 | 3.6 | -4.5 |
| GO:0042269 | regulation of natural killer cell mediated cytotoxicity | -6.1 | 7.3 | -4.5 |
| GO:1904646 | cellular response to amyloid-beta | -6.1 | 7.3 | -4.5 |
| hsa05340 | Primary immunodeficiency | -6.1 | 7.3 | -4.5 |
| GO:0002313 | mature B cell differentiation involved in immune response | -6.1 | 9.9 | -4.4 |
| GO:0060333 | interferon-gamma-mediated signaling pathway | -6.1 | 4.9 | -4.4 |
| ko04666 | Fc gamma R-mediated phagocytosis | -6.1 | 4.9 | -4.4 |
| M122 | PID IL2 1PATHWAY | -6.1 | 6.4 | -4.4 |
| M60 | PID NFAT TFPATHWAY | -6 | 7.1 | -4.4 |
| GO:0071347 | cellular response to interleukin-1 | -6 | 3.6 | -4.4 |
| GO:0051896 | regulation of protein kinase B signaling | -6 | 3.1 | -4.4 |
| GO:0043902 | positive regulation of multi-organism process | -6 | 3.4 | -4.3 |
| GO:0032731 | positive regulation of interleukin-1 beta production | -6 | 6.3 | -4.3 |
| hsa04666 | Fc gamma R-mediated phagocytosis | -6 | 4.5 | -4.3 |
| GO:0050871 | positive regulation of B cell activation | -6 | 3.8 | -4.3 |
| GO:0036037 | CD8-positive, alpha-beta T cell activation | -5.9 | 9.5 | -4.3 |
| GO:0043029 | T cell homeostasis | -5.9 | 8 | -4.3 |
| GO:0045066 | regulatory T cell differentiation | -5.9 | 8 | -4.3 |
| hsa04625 | c-type lectin receptor signaling pathway | -5.9 | 4.5 | -4.3 |
| R-HSA-194138 | Signaling by VEGF | -5.9 | 4.5 | -4.3 |
| M8626 | SIG BCR SIGNALING PATHWAY | -5.9 | 7 | -4.3 |
| R-HSA-194840 | Rho GTPase cycle | -5.9 | 3.8 | -4.3 |
| GO:0008285 | negative regulation of cell proliferation | -5.9 | 2.1 | -4.3 |
| GO:0032757 | positive regulation of interleukin-8 production | -5.9 | 6.2 | -4.3 |
| GO:0031295 | T cell costimulation | -5.9 | 6.2 | -4.3 |
| GO:0071900 | regulation of protein serine/threonine kinase activity | -5.9 | 2.3 | -4.2 |
| GO:0002887 | negative regulation of myeloid leukocyte mediated immunity | -5.8 | 20 | -4.2 |
| R-HSA-164944 | Nef and signal transduction | -5.8 | 20 | -4.2 |
| R-HSA-1236973 | Cross-presentation of particulate exogenous antigens (phagosomes) | -5.8 | 20 | -4.2 |
| GO:0032611 | interleukin-1 beta production | -5.8 | 4.4 | -4.2 |
| GO:0090218 | positive regulation of lipid kinase activity | -5.8 | 7.8 | -4.2 |
| M196 | PID IL23 PATHWAY | -5.8 | 7.8 | -4.2 |
| WP3640 | Imatinib and Chronic Myeloid Leukemia | -5.8 | 11 | -4.2 |
| R-HSA-9664417 | Leishmania phagocytosis | -5.8 | 6.1 | -4.2 |
| R-HSA-9664422 | FCGR3A-mediated phagocytosis | -5.8 | 6.1 | -4.2 |
| R-HSA-9664407 | Parasite infection | -5.8 | 6.1 | -4.2 |
| WP558 | Complement and Coagulation Cascades | -5.8 | 6.1 | -4.2 |
| R-HSA-166658 | Complement cascade | -5.8 | 6.1 | -4.2 |
| R-HSA-164952 | The role of Nef in HIV-1 replication and disease pathogenesis | -5.8 | 9.2 | -4.2 |
| GO:0010575 | positive regulation of vascular endothelial growth factor production | -5.8 | 9.2 | -4.2 |
| GO:0071396 | cellular response to lipid | -5.8 | 2.3 | -4.2 |
| GO:0050769 | positive regulation of neurogenesis | -5.8 | 2.4 | -4.2 |
| GO:1901342 | regulation of vasculature development | -5.8 | 2.5 | -4.2 |
| GO:0010720 | positive regulation of cell development | -5.7 | 2.3 | -4.1 |
| GO:0032663 | regulation of interleukin-2 production | -5.7 | 6 | -4.1 |
| GO:0031294 | lymphocyte costimulation | -5.7 | 6 | -4.1 |
| hsa04630 | JAK-STAT signaling pathway | -5.7 | 3.6 | -4.1 |
| GO:0002698 | negative regulation of immune effector process | -5.7 | 4.1 | -4.1 |
| GO:0071675 | regulation of mononuclear cell migration | -5.7 | 6.7 | -4.1 |
| hsa05202 | Transcriptional misregulation in cancer | -5.7 | 3.3 | -4.1 |
| GO:0032147 | activation of protein kinase activity | -5.7 | 2.7 | -4.1 |
| R-HSA-500792 | GPCR ligand binding | -5.7 | 2.4 | -4.1 |
| GO:0031098 | stress-activated protein kinase signaling cascade | -5.7 | 2.8 | -4.1 |
| WP2583 | T-Cell Receptor and Co-stimulatory Signaling | -5.7 | 8.8 | -4.1 |
| R-HSA-4420097 | VEGFA-VEGFR2 Pathway | -5.7 | 4.6 | -4.1 |
| GO:0032722 | positive regulation of chemokine production | -5.7 | 5.9 | -4.1 |
| R-HSA-2029482 | Regulation of actin dynamics for phagocytic cup formation | -5.7 | 5.9 | -4.1 |
| GO:0035589 | G protein-coupled purinergic nucleotide receptor signaling pathway | -5.7 | 14 | -4.1 |
| GO:0051051 | negative regulation of transport | -5.7 | 2.4 | -4.1 |
| GO:0033630 | positive regulation of cell adhesion mediated by integrin | -5.7 | 11 | -4.1 |
| GO:0043303 | mast cell degranulation | -5.6 | 6.5 | -4.1 |
| GO:0032612 | interleukin-1 production | -5.6 | 4 | -4.1 |
| WP455 | GPCRs, Class A Rhodopsin-like | -5.6 | 3 | -4 |
| GO:2000516 | positive regulation of CD4-positive, alpha-beta T cell activation | -5.6 | 7.4 | -4 |
| GO:1905521 | regulation of macrophage migration | -5.6 | 7.4 | -4 |
| GO:0045622 | regulation of T-helper cell differentiation | -5.6 | 7.4 | -4 |
| GO:0032623 | interleukin-2 production | -5.6 | 5.8 | -4 |
| GO:0007254 | JNK cascade | -5.6 | 3.2 | -4 |
| GO:0002279 | mast cell activation involved in immune response | -5.6 | 6.4 | -4 |
| GO:0002448 | mast cell mediated immunity | -5.6 | 6.4 | -4 |
| GO:0070231 | T cell apoptotic process | -5.6 | 6.4 | -4 |
| GO:2000406 | positive regulation of T cell migration | -5.6 | 8.5 | -4 |
| WP453 | Inflammatory Response Pathway | -5.6 | 8.5 | -4 |
| GO:0045577 | regulation of B cell differentiation | -5.6 | 8.5 | -4 |
| R-HSA-2424491 | DAP12 signaling | -5.6 | 8.5 | -4 |
| R-HSA-166016 | Toll Like Receptor 4 (TLR4) Cascade | -5.6 | 4 | -4 |
| GO:0043405 | regulation of MAP kinase activity | -5.5 | 2.7 | -4 |
| GO:0051092 | positive regulation of NF-kappaB transcription factor activity | -5.5 | 3.6 | -4 |
| GO:0150077 | regulation of neuroinflammatory response | -5.5 | 7.2 | -3.9 |
| R-HSA-9664323 | FCGR3A-mediated IL10 synthesis | -5.5 | 7.2 | -3.9 |
| GO:1902106 | negative regulation of leukocyte differentiation | -5.5 | 4.4 | -3.9 |
| WP236 | Adipogenesis | -5.5 | 3.9 | -3.9 |
| GO:0071902 | positive regulation of protein serine/threonine kinase activity | -5.5 | 2.7 | -3.9 |
| GO:0002673 | regulation of acute inflammatory response | -5.5 | 3.6 | -3.9 |
| GO:0010959 | regulation of metal ion transport | -5.4 | 2.5 | -3.9 |
| GO:2000401 | regulation of lymphocyte migration | -5.4 | 5.6 | -3.9 |
| ko05310 | Asthma | -5.4 | 8.3 | -3.9 |
| GO:0097190 | apoptotic signaling pathway | -5.4 | 2.2 | -3.9 |
| GO:0032637 | interleukin-8 production | -5.4 | 4.4 | -3.8 |
| ko05202 | Transcriptional misregulation in cancer | -5.4 | 3.4 | -3.8 |
| GO:0070374 | positive regulation of ERK1 and ERK2 cascade | -5.4 | 3.1 | -3.8 |
| GO:0048247 | lymphocyte chemotaxis | -5.4 | 5.5 | -3.8 |
| hsa05320 | Autoimmune thyroid disease | -5.4 | 5.5 | -3.8 |
| M28 | PID IL4 2PATHWAY | -5.4 | 5.5 | -3.8 |
| GO:0045765 | regulation of angiogenesis | -5.4 | 2.5 | -3.8 |
| GO:0032651 | regulation of interleukin-1 beta production | -5.4 | 4.3 | -3.8 |
| GO:0002504 | antigen processing and presentation of peptide or polysaccharide antigen via MHC class II | -5.4 | 4.3 | -3.8 |
| ko04620 | Toll-like receptor signaling pathway | -5.4 | 4.3 | -3.8 |
| GO:0050857 | positive regulation of antigen receptor-mediated signaling pathway | -5.4 | 9.8 | -3.8 |
| R-HSA-389948 | PD-1 signaling | -5.4 | 9.8 | -3.8 |
| GO:0097553 | calcium ion transmembrane import into cytosol | -5.3 | 3.8 | -3.8 |
| GO:0002720 | positive regulation of cytokine production involved in immune response | -5.3 | 6 | -3.8 |
| GO:1905517 | macrophage migration | -5.3 | 6 | -3.8 |
| GO:0002833 | positive regulation of response to biotic stimulus | -5.3 | 6 | -3.8 |
| GO:1903900 | regulation of viral life cycle | -5.3 | 3.5 | -3.8 |
| R-HSA-877300 | Interferon gamma signaling | -5.3 | 4.6 | -3.7 |
| WP615 | Senescence and Autophagy in Cancer | -5.3 | 4.3 | -3.7 |
| GO:1901615 | organic hydroxy compound metabolic process | -5.3 | 2.2 | -3.7 |
| GO:0032652 | regulation of interleukin-1 production | -5.3 | 4 | -3.7 |
| GO:0120035 | regulation of plasma membrane bounded cell projection organization | -5.3 | 2.1 | -3.7 |
| R-HSA-2219530 | Constitutive Signaling by Aberrant PI3K in Cancer | -5.3 | 4.9 | -3.7 |
| R-HSA-9006925 | Intracellular signaling by second messengers | -5.3 | 2.7 | -3.7 |
| GO:0010810 | regulation of cell-substrate adhesion | -5.3 | 3.1 | -3.7 |
| ko05169 | Epstein-Barr virus infection | -5.3 | 3.2 | -3.7 |
| hsa04810 | Regulation of actin cytoskeleton | -5.3 | 3 | -3.7 |
| R-HSA-6811558 | PI5P, PP2A and IER3 Regulate PI3K/AKT Signaling | -5.3 | 4.2 | -3.7 |
| GO:0032088 | negative regulation of NF-kappaB transcription factor activity | -5.3 | 4.5 | -3.7 |
| WP395 | IL-4 Signaling Pathway | -5.2 | 5.9 | -3.7 |
| GO:0002712 | regulation of B cell mediated immunity | -5.2 | 5.9 | -3.7 |
| GO:0002889 | regulation of immunoglobulin mediated immune response | -5.2 | 5.9 | -3.7 |
| GO:2000404 | regulation of T cell migration | -5.2 | 6.7 | -3.7 |
| GO:0009612 | response to mechanical stimulus | -5.2 | 3.2 | -3.7 |
| GO:0008202 | steroid metabolic process | -5.2 | 2.6 | -3.7 |
| GO:0048871 | multicellular organismal homeostasis | -5.2 | 2.3 | -3.7 |
| GO:0032633 | interleukin-4 production | -5.2 | 7.8 | -3.7 |
| R-HSA-5602358 | Diseases associated with the TLR signaling cascade | -5.2 | 9.3 | -3.7 |
| GO:0090023 | positive regulation of neutrophil chemotaxis | -5.2 | 9.3 | -3.7 |
| GO:0035588 | G protein-coupled purinergic receptor signaling pathway | -5.2 | 9.3 | -3.7 |
| R-HSA-5260271 | Diseases of Immune System | -5.2 | 9.3 | -3.7 |
| GO:0032753 | positive regulation of interleukin-4 production | -5.2 | 9.3 | -3.7 |
| hsa04933 | AGE-RAGE signaling pathway in diabetic complications | -5.2 | 4.2 | -3.7 |
| M3468 | NABA ECM REGULATORS | -5.2 | 3 | -3.7 |
| WP4541 | Hippo-Merlin Signaling Dysregulation | -5.2 | 3.9 | -3.7 |
| GO:0006979 | response to oxidative stress | -5.2 | 2.3 | -3.7 |
| GO:0002524 | hypersensitivity | -5.2 | 16 | -3.7 |
| GO:0043301 | negative regulation of leukocyte degranulation | -5.2 | 16 | -3.7 |
| GO:0002291 | T cell activation via T cell receptor contact with antigen bound to MHC molecule on antigen presenting cell | -5.2 | 16 | -3.7 |
| GO:0043406 | positive regulation of MAP kinase activity | -5.2 | 2.9 | -3.6 |
| R-HSA-416482 | G alpha (12/13) signalling events | -5.2 | 4.8 | -3.6 |
| ko04668 | TNF signaling pathway | -5.2 | 4.2 | -3.6 |
| GO:1903409 | reactive oxygen species biosynthetic process | -5.2 | 3.9 | -3.6 |
| R-HSA-451927 | Interleukin-2 family signaling | -5.1 | 6.6 | -3.6 |
| GO:0031344 | regulation of cell projection organization | -5.1 | 2 | -3.6 |
| GO:0070232 | regulation of T cell apoptotic process | -5.1 | 7.5 | -3.6 |
| GO:0002637 | regulation of immunoglobulin production | -5.1 | 5.2 | -3.6 |
| GO:0032602 | chemokine production | -5.1 | 4.4 | -3.6 |
| ko04630 | Jak-STAT signaling pathway | -5.1 | 3.5 | -3.6 |
| GO:0031664 | regulation of lipopolysaccharide-mediated signaling pathway | -5.1 | 9 | -3.6 |
| GO:0051403 | stress-activated MAPK cascade | -5.1 | 2.8 | -3.5 |
| GO:0090713 | immunological memory process | -5.1 | 11 | -3.5 |
| M212 | PID INTEGRIN5 PATHWAY | -5.1 | 11 | -3.5 |
| ko04512 | ECM-receptor interaction | -5.1 | 4.7 | -3.5 |
| WP289 | Myometrial Relaxation and Contraction Pathways | -5 | 3.5 | -3.5 |
| ko05146 | Amoebiasis | -5 | 4.3 | -3.5 |
| GO:0010035 | response to inorganic substance | -5 | 2.2 | -3.5 |
| GO:0045596 | negative regulation of cell differentiation | -5 | 2 | -3.5 |
| hsa04620 | Toll-like receptor signaling pathway | -5 | 4 | -3.5 |
| hsa05020 | Prion disease | -5 | 7.3 | -3.5 |
| ko05020 | Prion diseases | -5 | 7.3 | -3.5 |
| GO:0032677 | regulation of interleukin-8 production | -5 | 4.3 | -3.5 |
| M167 | PID AP1 PATHWAY | -5 | 5 | -3.5 |
| GO:0051209 | release of sequestered calcium ion into cytosol | -5 | 4 | -3.5 |
| R-HSA-983705 | Signaling by the B Cell Receptor (BCR) | -5 | 4 | -3.5 |
| M47 | PID INTEGRIN CS PATHWAY | -5 | 8.6 | -3.4 |
| GO:1902532 | negative regulation of intracellular signal transduction | -4.9 | 2.1 | -3.4 |
| R-HSA-202424 | Downstream TCR signaling | -4.9 | 4.3 | -3.4 |
| GO:0000302 | response to reactive oxygen species | -4.9 | 2.9 | -3.4 |
| GO:2000668 | regulation of dendritic cell apoptotic process | -4.9 | 15 | -3.4 |
| GO:0045060 | negative thymic T cell selection | -4.9 | 15 | -3.4 |
| GO:0097048 | dendritic cell apoptotic process | -4.9 | 15 | -3.4 |
| R-HSA-199418 | Negative regulation of the PI3K/AKT network | -4.9 | 4 | -3.4 |
| GO:0051283 | negative regulation of sequestering of calcium ion | -4.9 | 4 | -3.4 |
| GO:1903318 | negative regulation of protein maturation | -4.9 | 7.1 | -3.4 |
| GO:0010955 | negative regulation of protein processing | -4.9 | 7.1 | -3.4 |
| GO:0045730 | respiratory burst | -4.9 | 7.1 | -3.4 |
| ko04810 | Regulation of actin cytoskeleton | -4.9 | 3 | -3.4 |
| GO:0032695 | negative regulation of interleukin-12 production | -4.9 | 11 | -3.4 |
| M183 | PID IL6 7 PATHWAY | -4.9 | 6.1 | -3.4 |
| ko04933 | AGE-RAGE signaling pathway in diabetic complications | -4.9 | 4.2 | -3.4 |
| GO:0019886 | antigen processing and presentation of exogenous peptide antigen via MHC class II | -4.9 | 4.2 | -3.4 |
| WP304 | Kit receptor signaling pathway | -4.9 | 5.4 | -3.4 |
| R-HSA-193648 | NRAGE signals death through JNK | -4.9 | 5.4 | -3.4 |
| GO:0043030 | regulation of macrophage activation | -4.9 | 5.4 | -3.4 |
| R-HSA-9706374 | FLT3 signaling through SRC family kinases | -4.9 | 21 | -3.4 |
| GO:0002501 | peptide antigen assembly with MHC protein complex | -4.9 | 21 | -3.4 |
| M3008 | NABA ECM GLYCOPROTEINS | -4.9 | 3.1 | -3.4 |
| GO:0043901 | negative regulation of multi-organism process | -4.9 | 3.2 | -3.4 |
| R-HSA-162909 | Host Interactions of HIV factors | -4.9 | 3.7 | -3.4 |
| hsa05322 | Systemic lupus erythematosus | -4.9 | 3.5 | -3.4 |
| M124 | PID CXCR4 PATHWAY | -4.8 | 4.2 | -3.3 |
| GO:0051282 | regulation of sequestering of calcium ion | -4.8 | 3.9 | -3.3 |
| hsa04668 | TNF signaling pathway | -4.8 | 3.9 | -3.3 |
| GO:0071624 | positive regulation of granulocyte chemotaxis | -4.8 | 8.3 | -3.3 |
| GO:0010818 | T cell chemotaxis | -4.8 | 8.3 | -3.3 |
| hsa04512 | ECM-receptor interaction | -4.8 | 4.5 | -3.3 |
| GO:0060627 | regulation of vesicle-mediated transport | -4.8 | 2.2 | -3.3 |
| WP619 | Type II interferon signaling (IFNG) | -4.8 | 6.9 | -3.3 |
| M141 | PID PI3KCI PATHWAY | -4.8 | 6 | -3.3 |
| GO:0050798 | activated T cell proliferation | -4.8 | 6 | -3.3 |
| GO:0032653 | regulation of interleukin-10 production | -4.8 | 5.3 | -3.3 |
| GO:0090630 | activation of GTPase activity | -4.8 | 3.9 | -3.3 |
| GO:1903727 | positive regulation of phospholipid metabolic process | -4.7 | 5.9 | -3.2 |
| GO:0097028 | dendritic cell differentiation | -4.7 | 5.9 | -3.2 |
| ko05322 | Systemic lupus erythematosus | -4.7 | 3.6 | -3.2 |
| GO:0046330 | positive regulation of JNK cascade | -4.7 | 3.6 | -3.2 |
| GO:0070664 | negative regulation of leukocyte proliferation | -4.7 | 4.4 | -3.2 |
| GO:0001914 | regulation of T cell mediated cytotoxicity | -4.7 | 6.7 | -3.2 |
| GO:0032733 | positive regulation of interleukin-10 production | -4.7 | 6.7 | -3.2 |
| M241 | PID RAC1 REG PATHWAY | -4.7 | 6.7 | -3.2 |
| GO:0001782 | B cell homeostasis | -4.7 | 8 | -3.2 |
| R-HSA-8851680 | Butyrophilin (BTN) family interactions | -4.7 | 13 | -3.2 |
| GO:0043380 | regulation of memory T cell differentiation | -4.7 | 13 | -3.2 |
| GO:0043383 | negative T cell selection | -4.7 | 13 | -3.2 |
| GO:0002495 | antigen processing and presentation of peptide antigen via MHC class II | -4.7 | 4 | -3.2 |
| WP185 | Integrin-mediated Cell Adhesion | -4.7 | 4 | -3.2 |
| GO:0043269 | regulation of ion transport | -4.7 | 2 | -3.2 |
| GO:0006801 | superoxide metabolic process | -4.7 | 4.7 | -3.2 |
| WP24 | Peptide GPCRs | -4.7 | 4.7 | -3.2 |
| GO:0010573 | vascular endothelial growth factor production | -4.7 | 5.2 | -3.2 |
| GO:0045453 | bone resorption | -4.7 | 5.2 | -3.2 |
| GO:0032613 | interleukin-10 production | -4.7 | 5.2 | -3.2 |
| GO:0002437 | inflammatory response to antigenic stimulus | -4.7 | 5.2 | -3.2 |
| GO:0032642 | regulation of chemokine production | -4.7 | 4.3 | -3.2 |
| hsa04066 | HIF-1 signaling pathway | -4.7 | 3.8 | -3.2 |
| GO:0051208 | sequestering of calcium ion | -4.7 | 3.8 | -3.2 |
| ko05133 | Pertussis | -4.6 | 4.6 | -3.2 |
| R-HSA-9662851 | Anti-inflammatory response favouring Leishmania parasite infection | -4.6 | 3.2 | -3.1 |
| R-HSA-9664433 | Leishmania parasite growth and survival | -4.6 | 3.2 | -3.1 |
| GO:0001916 | positive regulation of T cell mediated cytotoxicity | -4.6 | 7.7 | -3.1 |
| GO:0002675 | positive regulation of acute inflammatory response | -4.6 | 7.7 | -3.1 |
| GO:0001773 | myeloid dendritic cell activation | -4.6 | 7.7 | -3.1 |
| GO:0009595 | detection of biotic stimulus | -4.6 | 7.7 | -3.1 |
| GO:1902624 | positive regulation of neutrophil migration | -4.6 | 7.7 | -3.1 |
| GO:0070233 | negative regulation of T cell apoptotic process | -4.6 | 9.6 | -3.1 |
| GO:0090026 | positive regulation of monocyte chemotaxis | -4.6 | 9.6 | -3.1 |
| GO:0006869 | lipid transport | -4.6 | 2.4 | -3.1 |
| ko04621 | NOD-like receptor signaling pathway | -4.6 | 3.2 | -3.1 |
| GO:0016485 | protein processing | -4.6 | 2.5 | -3.1 |
| GO:0009636 | response to toxic substance | -4.6 | 2.2 | -3.1 |
| GO:0038061 | NIK/NF-kappaB signaling | -4.5 | 3.1 | -3.1 |
| GO:0001501 | skeletal system development | -4.5 | 2.2 | -3.1 |
| hsa05146 | Amoebiasis | -4.5 | 3.9 | -3.1 |
| WP4538 | Regulatory circuits of the STAT3 signaling pathway | -4.5 | 4.5 | -3.1 |
| CORUM:2879 | CD20-LCK-FYN-p75/80 complex | -4.5 | 32 | -3.1 |
| CORUM:6213 | DOCK8-WIP-WASp complex | -4.5 | 32 | -3.1 |
| GO:0002408 | myeloid dendritic cell chemotaxis | -4.5 | 32 | -3.1 |
| GO:0097026 | dendritic cell dendrite assembly | -4.5 | 32 | -3.1 |
| GO:0002581 | negative regulation of antigen processing and presentation of peptide or polysaccharide antigen via MHC class II | -4.5 | 32 | -3.1 |
| GO:2000547 | regulation of dendritic cell dendrite assembly | -4.5 | 32 | -3.1 |
| CORUM:6418 | C1q complex | -4.5 | 32 | -3.1 |
| GO:0043379 | memory T cell differentiation | -4.5 | 12 | -3.1 |
| GO:0002430 | complement receptor mediated signaling pathway | -4.5 | 12 | -3.1 |
| M234 | PID IL2 STAT5 PATHWAY | -4.5 | 7.5 | -3.1 |
| GO:0032743 | positive regulation of interleukin-2 production | -4.5 | 7.5 | -3.1 |
| GO:0002828 | regulation of type 2 immune response | -4.5 | 7.5 | -3.1 |
| GO:0002396 | MHC protein complex assembly | -4.5 | 18 | -3.1 |
| GO:0002606 | positive regulation of dendritic cell antigen processing and presentation | -4.5 | 18 | -3.1 |
| GO:2000669 | negative regulation of dendritic cell apoptotic process | -4.5 | 18 | -3.1 |
| GO:0002920 | regulation of humoral immune response | -4.5 | 3.5 | -3 |
| R-HSA-2132295 | MHC class II antigen presentation | -4.5 | 3.6 | -3 |
| GO:0000187 | activation of MAPK activity | -4.5 | 3.3 | -3 |
| GO:0007229 | integrin-mediated signaling pathway | -4.5 | 3.9 | -3 |
| M5883 | NABA SECRETED FACTORS | -4.5 | 2.4 | -3 |
| WP1433 | Nucleotide-binding Oligomerization Domain (NOD) pathway | -4.5 | 6.3 | -3 |
| GO:0042088 | T-helper 1 type immune response | -4.5 | 6.3 | -3 |
| GO:0046596 | regulation of viral entry into host cell | -4.5 | 6.3 | -3 |
| GO:1903707 | negative regulation of hemopoiesis | -4.5 | 3.3 | -3 |
| GO:0097435 | supramolecular fiber organization | -4.5 | 1.9 | -3 |
| GO:0002886 | regulation of myeloid leukocyte mediated immunity | -4.5 | 5.4 | -3 |
| WP1533 | Vitamin B12 Metabolism | -4.5 | 5.4 | -3 |
| GO:0070482 | response to oxygen levels | -4.5 | 2.3 | -3 |
| GO:0051091 | positive regulation of DNA-binding transcription factor activity | -4.4 | 2.7 | -3 |
| GO:1901222 | regulation of NIK/NF-kappaB signaling | -4.4 | 3.6 | -3 |
| GO:0016311 | dephosphorylation | -4.4 | 2.1 | -3 |
| R-HSA-5621481 | C-type lectin receptors (CLRs) | -4.4 | 3.4 | -2.9 |
| ko05418 | Fluid shear stress and atherosclerosis | -4.4 | 3.4 | -2.9 |
| GO:0070613 | regulation of protein processing | -4.4 | 3.1 | -2.9 |
| GO:0043122 | regulation of I-kappaB kinase/NF-kappaB signaling | -4.4 | 2.7 | -2.9 |
| GO:0001666 | response to hypoxia | -4.4 | 2.4 | -2.9 |
| GO:0030193 | regulation of blood coagulation | -4.4 | 4.4 | -2.9 |
| hsa05133 | Pertussis | -4.4 | 4.4 | -2.9 |
| GO:0050672 | negative regulation of lymphocyte proliferation | -4.4 | 4.4 | -2.9 |
| GO:0002922 | positive regulation of humoral immune response | -4.4 | 8.7 | -2.9 |
| GO:0045778 | positive regulation of ossification | -4.3 | 4 | -2.9 |
| GO:1903317 | regulation of protein maturation | -4.3 | 3.1 | -2.9 |
| GO:0040013 | negative regulation of locomotion | -4.3 | 2.3 | -2.9 |
| GO:0007163 | establishment or maintenance of cell polarity | -4.3 | 2.8 | -2.9 |
| GO:0050862 | positive regulation of T cell receptor signaling pathway | -4.3 | 11 | -2.9 |
| GO:0002467 | germinal center formation | -4.3 | 11 | -2.9 |
| GO:0045059 | positive thymic T cell selection | -4.3 | 11 | -2.9 |
| M190 | PID TCR JNK PATHWAY | -4.3 | 11 | -2.9 |
| GO:0090715 | immunological memory formation process | -4.3 | 11 | -2.9 |
| GO:0043374 | CD8-positive, alpha-beta T cell differentiation | -4.3 | 11 | -2.9 |
| ko05134 | Legionellosis | -4.3 | 5.2 | -2.9 |
| GO:0010559 | regulation of glycoprotein biosynthetic process | -4.3 | 5.2 | -2.9 |
| GO:0045620 | negative regulation of lymphocyte differentiation | -4.3 | 5.2 | -2.9 |
| GO:2000116 | regulation of cysteine-type endopeptidase activity | -4.3 | 2.8 | -2.9 |
| GO:1900046 | regulation of hemostasis | -4.3 | 4.3 | -2.9 |
| GO:0032945 | negative regulation of mononuclear cell proliferation | -4.3 | 4.3 | -2.9 |
| R-HSA-2871796 | FCERI mediated MAPK activation | -4.3 | 7 | -2.9 |
| R-HSA-983695 | Antigen activates B Cell Receptor (BCR) leading to generation of second messengers | -4.3 | 7 | -2.9 |
| GO:0032673 | regulation of interleukin-4 production | -4.3 | 7 | -2.9 |
| GO:0090022 | regulation of neutrophil chemotaxis | -4.3 | 7 | -2.9 |
| M53 | PID INTEGRIN3 PATHWAY | -4.3 | 6 | -2.9 |
| GO:1902622 | regulation of neutrophil migration | -4.3 | 6 | -2.9 |
| GO:0002576 | platelet degranulation | -4.3 | 3.5 | -2.9 |
| GO:0035690 | cellular response to drug | -4.3 | 2.4 | -2.9 |
| GO:0046328 | regulation of JNK cascade | -4.3 | 3 | -2.9 |
| GO:0006066 | alcohol metabolic process | -4.3 | 2.3 | -2.9 |
| R-HSA-162906 | HIV Infection | -4.3 | 2.7 | -2.9 |
| GO:0002431 | Fc receptor mediated stimulatory signaling pathway | -4.3 | 3.3 | -2.9 |
| hsa05165 | human papillomavirus infection | -4.3 | 2.4 | -2.9 |
| GO:0048524 | positive regulation of viral process | -4.3 | 3.7 | -2.8 |
| R-HSA-114608 | Platelet degranulation | -4.3 | 3.5 | -2.8 |
| GO:0032874 | positive regulation of stress-activated MAPK cascade | -4.3 | 3.1 | -2.8 |
| R-HSA-1236975 | Antigen processing-Cross presentation | -4.3 | 3.9 | -2.8 |
| GO:0097191 | extrinsic apoptotic signaling pathway | -4.3 | 2.8 | -2.8 |
| R-HSA-913531 | Interferon Signaling | -4.2 | 2.9 | -2.8 |
| WP4659 | Gastrin Signaling Pathway | -4.2 | 3.7 | -2.8 |
| GO:0002438 | acute inflammatory response to antigenic stimulus | -4.2 | 8.4 | -2.8 |
| R-HSA-166663 | Initial triggering of complement | -4.2 | 8.4 | -2.8 |
| WP4481 | Resistin as a regulator of inflammation | -4.2 | 6.8 | -2.8 |
| R-HSA-8964043 | Plasma lipoprotein clearance | -4.2 | 6.8 | -2.8 |
| GO:0002724 | regulation of T cell cytokine production | -4.2 | 6.8 | -2.8 |
| GO:0032814 | regulation of natural killer cell activation | -4.2 | 6.8 | -2.8 |
| hsa05205 | Proteoglycans in cancer | -4.2 | 2.8 | -2.8 |
| GO:0098757 | cellular response to interleukin-21 | -4.2 | 16 | -2.8 |
| GO:0038114 | interleukin-21-mediated signaling pathway | -4.2 | 16 | -2.8 |
| GO:0002883 | regulation of hypersensitivity | -4.2 | 16 | -2.8 |
| GO:0050859 | negative regulation of B cell receptor signaling pathway | -4.2 | 16 | -2.8 |
| GO:0035701 | hematopoietic stem cell migration | -4.2 | 16 | -2.8 |
| GO:0031666 | positive regulation of lipopolysaccharide-mediated signaling pathway | -4.2 | 16 | -2.8 |
| GO:0098756 | response to interleukin-21 | -4.2 | 16 | -2.8 |
| R-HSA-174824 | Plasma lipoprotein assembly, remodeling, and clearance | -4.2 | 4.6 | -2.8 |
| GO:1903426 | regulation of reactive oxygen species biosynthetic process | -4.2 | 3.9 | -2.8 |
| GO:0050890 | cognition | -4.2 | 2.6 | -2.8 |
| M100 | PID SHP2 PATHWAY | -4.2 | 5.1 | -2.8 |
| GO:0070304 | positive regulation of stress-activated protein kinase signaling cascade | -4.2 | 3.1 | -2.8 |
| hsa05418 | Fluid shear stress and atherosclerosis | -4.2 | 3.2 | -2.8 |
| GO:0051271 | negative regulation of cellular component movement | -4.2 | 2.3 | -2.8 |
| GO:0019915 | lipid storage | -4.2 | 4.1 | -2.8 |
| GO:1900744 | regulation of p38MAPK cascade | -4.2 | 5.7 | -2.8 |
| R-HSA-2172127 | DAP12 interactions | -4.2 | 5.7 | -2.8 |
| GO:0002707 | negative regulation of lymphocyte mediated immunity | -4.2 | 5.7 | -2.8 |
| GO:0045579 | positive regulation of B cell differentiation | -4.2 | 11 | -2.8 |
| GO:0032352 | positive regulation of hormone metabolic process | -4.2 | 11 | -2.8 |
| GO:0046579 | positive regulation of Ras protein signal transduction | -4.2 | 4.5 | -2.7 |
| WP2877 | Vitamin D Receptor Pathway | -4.2 | 3 | -2.7 |
| GO:0010574 | regulation of vascular endothelial growth factor production | -4.1 | 5 | -2.7 |
| GO:0036293 | response to decreased oxygen levels | -4.1 | 2.3 | -2.7 |
| GO:0014812 | muscle cell migration | -4.1 | 3.8 | -2.7 |
| GO:0043123 | positive regulation of I-kappaB kinase/NF-kappaB signaling | -4.1 | 2.9 | -2.7 |
| GO:0001503 | ossification | -4.1 | 2.2 | -2.7 |
| GO:0050818 | regulation of coagulation | -4.1 | 4.1 | -2.7 |
| WP2865 | IL1 and megakaryocytes in obesity | -4.1 | 8 | -2.7 |
| R-HSA-5668599 | RHO GTPases Activate NADPH Oxidases | -4.1 | 8 | -2.7 |
| GO:0045992 | negative regulation of embryonic development | -4.1 | 8 | -2.7 |
| WP4585 | Cancer immunotherapy by PD-1 blockade | -4.1 | 8 | -2.7 |
| GO:0051046 | regulation of secretion | -4.1 | 2 | -2.7 |
| hsa04621 | NOD-like receptor signaling pathway | -4.1 | 2.9 | -2.7 |
| R-HSA-76005 | Response to elevated platelet cytosolic Ca2+ | -4.1 | 3.3 | -2.7 |
| GO:0002220 | innate immune response activating cell surface receptor signaling pathway | -4.1 | 3.5 | -2.7 |
| hsa05134 | Legionellosis | -4.1 | 4.9 | -2.7 |
| GO:0002009 | morphogenesis of an epithelium | -4.1 | 2 | -2.7 |
| GO:0010876 | lipid localization | -4.1 | 2.2 | -2.7 |
| GO:0071695 | anatomical structure maturation | -4.1 | 3.2 | -2.7 |
| WP3617 | Photodynamic therapy-induced NF-kB survival signaling | -4.1 | 6.4 | -2.6 |
| GO:0002755 | MyD88-dependent toll-like receptor signaling pathway | -4.1 | 6.4 | -2.6 |
| GO:0042554 | superoxide anion generation | -4.1 | 6.4 | -2.6 |
| ko05143 | African trypanosomiasis | -4.1 | 6.4 | -2.6 |
| GO:0002691 | regulation of cellular extravasation | -4.1 | 6.4 | -2.6 |
| GO:0007200 | phospholipase C-activating G protein-coupled receptor signaling pathway | -4 | 3.7 | -2.6 |
| GO:1904018 | positive regulation of vasculature development | -4 | 2.7 | -2.6 |
| GO:0002761 | regulation of myeloid leukocyte differentiation | -4 | 3.5 | -2.6 |
| GO:0014013 | regulation of gliogenesis | -4 | 3.5 | -2.6 |
| GO:0014909 | smooth muscle cell migration | -4 | 4 | -2.6 |
| GO:1903580 | positive regulation of ATP metabolic process | -4 | 5.5 | -2.6 |
| R-HSA-977606 | Regulation of Complement cascade | -4 | 5.5 | -2.6 |
| GO:0045581 | negative regulation of T cell differentiation | -4 | 5.5 | -2.6 |
| GO:0062013 | positive regulation of small molecule metabolic process | -4 | 3.1 | -2.6 |
| GO:0052548 | regulation of endopeptidase activity | -4 | 2.2 | -2.6 |
| GO:1901214 | regulation of neuron death | -4 | 2.4 | -2.6 |
| GO:0019724 | B cell mediated immunity | -4 | 2.7 | -2.6 |
| GO:0045591 | positive regulation of regulatory T cell differentiation | -4 | 10 | -2.6 |
| GO:0032604 | granulocyte macrophage colony-stimulating factor production | -4 | 10 | -2.6 |
| GO:0042730 | fibrinolysis | -4 | 7.7 | -2.6 |
| GO:0071677 | positive regulation of mononuclear cell migration | -4 | 7.7 | -2.6 |
| R-HSA-5683057 | MAPK family signaling cascades | -4 | 2.4 | -2.6 |
| R-HSA-2219528 | PI3K/AKT Signaling in Cancer | -4 | 3.7 | -2.6 |
| GO:0001667 | ameboidal-type cell migration | -4 | 2.1 | -2.6 |
| R-HSA-5684996 | MAPK1/MAPK3 signaling | -4 | 2.5 | -2.6 |
| GO:0060556 | regulation of vitamin D biosynthetic process | -4 | 14 | -2.6 |
| GO:0002579 | positive regulation of antigen processing and presentation | -4 | 14 | -2.6 |
| GO:2001187 | positive regulation of CD8-positive, alpha-beta T cell activation | -4 | 14 | -2.6 |
| GO:0002369 | T cell cytokine production | -4 | 6.2 | -2.6 |
| GO:0042092 | type 2 immune response | -4 | 6.2 | -2.6 |
| GO:0030278 | regulation of ossification | -4 | 2.8 | -2.6 |
| WP2431 | Spinal Cord Injury | -4 | 3.4 | -2.6 |
| GO:0043277 | apoptotic cell clearance | -4 | 5.3 | -2.6 |
| GO:1903018 | regulation of glycoprotein metabolic process | -4 | 4.7 | -2.6 |
| GO:0071496 | cellular response to external stimulus | -3.9 | 2.3 | -2.6 |
| R-HSA-983169 | Class I MHC mediated antigen processing & presentation | -3.9 | 2.3 | -2.5 |
| GO:0002605 | negative regulation of dendritic cell antigen processing and presentation | -3.9 | 24 | -2.5 |
| CORUM:2565 | CD20-LCK-LYN-FYN-p75/80 complex, (Raji human B cell line) | -3.9 | 24 | -2.5 |
| GO:0002503 | peptide antigen assembly with MHC class II protein complex | -3.9 | 24 | -2.5 |
| GO:0002399 | MHC class II protein complex assembly | -3.9 | 24 | -2.5 |
| CORUM:2955 | LCK-SLP76-PLC-gamma-1-LAT complex, pervanadate-activated | -3.9 | 24 | -2.5 |
| GO:0002584 | negative regulation of antigen processing and presentation of peptide antigen | -3.9 | 24 | -2.5 |
| GO:0002433 | immune response-regulating cell surface receptor signaling pathway involved in phagocytosis | -3.9 | 3.2 | -2.5 |
| GO:0038096 | Fc-gamma receptor signaling pathway involved in phagocytosis | -3.9 | 3.2 | -2.5 |
| WP3888 | VEGFA-VEGFR2 Signaling Pathway | -3.9 | 2.1 | -2.5 |
| R-HSA-204998 | Cell death signalling via NRAGE, NRIF and NADE | -3.9 | 4.2 | -2.5 |
| GO:0007015 | actin filament organization | -3.9 | 2.1 | -2.5 |
| GO:1901654 | response to ketone | -3.9 | 2.8 | -2.5 |
| GO:0032872 | regulation of stress-activated MAPK cascade | -3.9 | 2.6 | -2.5 |
| GO:0010737 | protein kinase A signaling | -3.9 | 6.1 | -2.5 |
| M65 | PID FRA PATHWAY | -3.9 | 6.1 | -2.5 |
| GO:1904994 | regulation of leukocyte adhesion to vascular endothelial cell | -3.9 | 6.1 | -2.5 |
| GO:0038094 | Fc-gamma receptor signaling pathway | -3.9 | 3.2 | -2.5 |
| GO:0033631 | cell-cell adhesion mediated by integrin | -3.9 | 9.4 | -2.5 |
| GO:0010759 | positive regulation of macrophage chemotaxis | -3.9 | 9.4 | -2.5 |
| hsa05167 | kaposi sarcoma-associated herpesvirus infection | -3.9 | 2.8 | -2.5 |
| GO:0032418 | lysosome localization | -3.9 | 4.2 | -2.5 |
| GO:0046209 | nitric oxide metabolic process | -3.9 | 4.2 | -2.5 |
| GO:0051057 | positive regulation of small GTPase mediated signal transduction | -3.9 | 4.2 | -2.5 |
| R-HSA-73887 | Death Receptor Signalling | -3.9 | 3.2 | -2.5 |
| GO:0046677 | response to antibiotic | -3.9 | 2.4 | -2.5 |
| WP3624 | Lung fibrosis | -3.9 | 4.6 | -2.5 |
| GO:1901653 | cellular response to peptide | -3.9 | 2.2 | -2.5 |
| GO:0034446 | substrate adhesion-dependent cell spreading | -3.8 | 3.6 | -2.5 |
| GO:1901137 | carbohydrate derivative biosynthetic process | -3.8 | 1.8 | -2.5 |
| GO:0007565 | female pregnancy | -3.8 | 2.9 | -2.5 |
| GO:0043433 | negative regulation of DNA-binding transcription factor activity | -3.8 | 2.9 | -2.5 |
| GO:0038066 | p38MAPK cascade | -3.8 | 5.1 | -2.5 |
| GO:0080135 | regulation of cellular response to stress | -3.8 | 1.8 | -2.4 |
| GO:0097305 | response to alcohol | -3.8 | 2.6 | -2.4 |
| GO:0070302 | regulation of stress-activated protein kinase signaling cascade | -3.8 | 2.6 | -2.4 |
| GO:0010742 | macrophage derived foam cell differentiation | -3.8 | 5.9 | -2.4 |
| GO:0090077 | foam cell differentiation | -3.8 | 5.9 | -2.4 |
| R-HSA-3000170 | Syndecan interactions | -3.8 | 7.1 | -2.4 |
| R-HSA-114508 | Effects of PIP2 hydrolysis | -3.8 | 7.1 | -2.4 |
| GO:0090025 | regulation of monocyte chemotaxis | -3.8 | 7.1 | -2.4 |
| GO:0034123 | positive regulation of toll-like receptor signaling pathway | -3.8 | 7.1 | -2.4 |
| GO:0002825 | regulation of T-helper 1 type immune response | -3.8 | 7.1 | -2.4 |
| GO:2001057 | reactive nitrogen species metabolic process | -3.8 | 4.1 | -2.4 |
| GO:0051048 | negative regulation of secretion | -3.8 | 3 | -2.4 |
| R-HSA-416476 | G alpha (q) signalling events | -3.8 | 2.7 | -2.4 |
| GO:0050848 | regulation of calcium-mediated signaling | -3.8 | 3.7 | -2.4 |
| M50 | PID PTP1B PATHWAY | -3.8 | 5 | -2.4 |
| R-HSA-9020958 | Interleukin-21 signaling | -3.8 | 13 | -2.4 |
| GO:0032817 | regulation of natural killer cell proliferation | -3.8 | 13 | -2.4 |
| R-HSA-5602498 | MyD88 deficiency (TLR2/4) | -3.8 | 13 | -2.4 |
| GO:0090087 | regulation of peptide transport | -3.7 | 2 | -2.4 |
| GO:0030036 | actin cytoskeleton organization | -3.7 | 1.8 | -2.4 |
| GO:0032656 | regulation of interleukin-13 production | -3.7 | 8.9 | -2.4 |
| GO:0035743 | CD4-positive, alpha-beta T cell cytokine production | -3.7 | 8.9 | -2.4 |
| GO:0001779 | natural killer cell differentiation | -3.7 | 8.9 | -2.4 |
| GO:0045824 | negative regulation of innate immune response | -3.7 | 4.4 | -2.4 |
| GO:0032350 | regulation of hormone metabolic process | -3.7 | 5.8 | -2.4 |
| GO:0002701 | negative regulation of production of molecular mediator of immune response | -3.7 | 5.8 | -2.4 |
| GO:0002377 | immunoglobulin production | -3.7 | 2.7 | -2.4 |
| GO:0045766 | positive regulation of angiogenesis | -3.7 | 2.7 | -2.4 |
| R-HSA-168188 | Toll Like Receptor TLR6:TLR2 Cascade | -3.7 | 3.7 | -2.4 |
| R-HSA-166058 | MyD88:MAL(TIRAP) cascade initiated on plasma membrane | -3.7 | 3.7 | -2.4 |
| GO:0050855 | regulation of B cell receptor signaling pathway | -3.7 | 6.9 | -2.4 |
| GO:0031346 | positive regulation of cell projection organization | -3.7 | 2.2 | -2.4 |
| GO:0002262 | myeloid cell homeostasis | -3.7 | 3.1 | -2.3 |
| hsa04010 | MAPK signaling pathway | -3.7 | 2.3 | -2.3 |
| GO:0051098 | regulation of binding | -3.7 | 2.2 | -2.3 |
| M255 | PID HIF1 TFPATHWAY | -3.7 | 4.4 | -2.3 |
| GO:0062012 | regulation of small molecule metabolic process | -3.7 | 2 | -2.3 |
| GO:0070588 | calcium ion transmembrane transport | -3.7 | 2.3 | -2.3 |
| GO:0014910 | regulation of smooth muscle cell migration | -3.7 | 4 | -2.3 |
| GO:0009988 | cell-cell recognition | -3.7 | 4 | -2.3 |
| GO:0045637 | regulation of myeloid cell differentiation | -3.7 | 2.5 | -2.3 |
| GO:0070423 | nucleotide-binding oligomerization domain containing signaling pathway | -3.7 | 5.6 | -2.3 |
| R-HSA-193704 | p75 NTR receptor-mediated signalling | -3.7 | 3.6 | -2.3 |
| GO:2000242 | negative regulation of reproductive process | -3.7 | 4.8 | -2.3 |
| ko05205 | Proteoglycans in cancer | -3.6 | 2.7 | -2.3 |
| GO:0051668 | localization within membrane | -3.6 | 3 | -2.3 |
| GO:1903530 | regulation of secretion by cell | -3.6 | 1.9 | -2.3 |
| GO:0016125 | sterol metabolic process | -3.6 | 2.9 | -2.3 |
| GO:1900048 | positive regulation of hemostasis | -3.6 | 6.6 | -2.3 |
| GO:0030194 | positive regulation of blood coagulation | -3.6 | 6.6 | -2.3 |
| GO:0002544 | chronic inflammatory response | -3.6 | 8.4 | -2.3 |
| GO:2001185 | regulation of CD8-positive, alpha-beta T cell activation | -3.6 | 8.4 | -2.3 |
| GO:0002902 | regulation of B cell apoptotic process | -3.6 | 8.4 | -2.3 |
| GO:0016064 | immunoglobulin mediated immune response | -3.6 | 2.6 | -2.3 |
| GO:2000146 | negative regulation of cell motility | -3.6 | 2.2 | -2.3 |
| R-HSA-168179 | Toll Like Receptor TLR1:TLR2 Cascade | -3.6 | 3.6 | -2.3 |
| R-HSA-181438 | Toll Like Receptor 2 (TLR2) Cascade | -3.6 | 3.6 | -2.3 |
| GO:0035872 | nucleotide-binding domain, leucine rich repeat containing receptor signaling pathway | -3.6 | 5.5 | -2.3 |
| WP4136 | Fibrin Complement Receptor 3 Signaling Pathway | -3.6 | 5.5 | -2.3 |
| GO:1903902 | positive regulation of viral life cycle | -3.6 | 4.2 | -2.2 |
| GO:0045669 | positive regulation of osteoblast differentiation | -3.6 | 4.2 | -2.2 |
| GO:0032387 | negative regulation of intracellular transport | -3.6 | 4.2 | -2.2 |
| R-HSA-5603041 | IRAK4 deficiency (TLR2/4) | -3.6 | 12 | -2.2 |
| GO:0035747 | natural killer cell chemotaxis | -3.6 | 12 | -2.2 |
| R-HSA-1059683 | Interleukin-6 signaling | -3.6 | 12 | -2.2 |
| GO:0046598 | positive regulation of viral entry into host cell | -3.6 | 12 | -2.2 |
| GO:0033632 | regulation of cell-cell adhesion mediated by integrin | -3.6 | 12 | -2.2 |
| GO:0032736 | positive regulation of interleukin-13 production | -3.6 | 12 | -2.2 |
| GO:0098883 | synapse pruning | -3.6 | 12 | -2.2 |
| GO:2000551 | regulation of T-helper 2 cell cytokine production | -3.6 | 12 | -2.2 |
| GO:0001787 | natural killer cell proliferation | -3.6 | 12 | -2.2 |
| GO:0002474 | antigen processing and presentation of peptide antigen via MHC class I | -3.6 | 3.6 | -2.2 |
| M257 | PID EPHRINB REV PATHWAY | -3.5 | 6.4 | -2.2 |
| GO:0045940 | positive regulation of steroid metabolic process | -3.5 | 6.4 | -2.2 |
| GO:0050820 | positive regulation of coagulation | -3.5 | 6.4 | -2.2 |
| GO:0008360 | regulation of cell shape | -3.5 | 3 | -2.2 |
| GO:0052547 | regulation of peptidase activity | -3.5 | 2 | -2.2 |
| M195 | PID CMYB PATHWAY | -3.5 | 3.8 | -2.2 |
| GO:2001233 | regulation of apoptotic signaling pathway | -3.5 | 2.1 | -2.2 |
| GO:0032829 | regulation of CD4-positive, CD25-positive, alpha-beta regulatory T cell differentiation | -3.5 | 19 | -2.2 |
| GO:0032831 | positive regulation of CD4-positive, CD25-positive, alpha-beta regulatory T cell differentiation | -3.5 | 19 | -2.2 |
| GO:0002457 | T cell antigen processing and presentation | -3.5 | 19 | -2.2 |
| GO:0060426 | lung vasculature development | -3.5 | 19 | -2.2 |
| GO:0097029 | mature conventional dendritic cell differentiation | -3.5 | 19 | -2.2 |
| GO:0002580 | regulation of antigen processing and presentation of peptide or polysaccharide antigen via MHC class II | -3.5 | 19 | -2.2 |
| GO:0002434 | immune complex clearance | -3.5 | 19 | -2.2 |
| GO:0002885 | positive regulation of hypersensitivity | -3.5 | 19 | -2.2 |
| GO:0070487 | monocyte aggregation | -3.5 | 19 | -2.2 |
| GO:0097035 | regulation of membrane lipid distribution | -3.5 | 4.7 | -2.2 |
| M174 | PID UPA UPAR PATHWAY | -3.5 | 5.3 | -2.2 |
| WP49 | IL-2 Signaling Pathway | -3.5 | 5.3 | -2.2 |
| R-HSA-2173782 | Binding and Uptake of Ligands by Scavenger Receptors | -3.5 | 5.3 | -2.2 |
| R-HSA-1257604 | PIP3 activates AKT signaling | -3.5 | 2.4 | -2.2 |
| GO:0002726 | positive regulation of T cell cytokine production | -3.5 | 8 | -2.2 |
| GO:0140131 | positive regulation of lymphocyte chemotaxis | -3.5 | 8 | -2.2 |
| GO:0032616 | interleukin-13 production | -3.5 | 8 | -2.2 |
| GO:0002827 | positive regulation of T-helper 1 type immune response | -3.5 | 8 | -2.2 |
| ko00100 | Steroid biosynthesis | -3.5 | 8 | -2.2 |
| GO:1903978 | regulation of microglial cell activation | -3.5 | 8 | -2.2 |
| GO:0010878 | cholesterol storage | -3.5 | 8 | -2.2 |
| R-HSA-622312 | Inflammasomes | -3.5 | 8 | -2.2 |
| GO:0030029 | actin filament-based process | -3.5 | 1.7 | -2.2 |
| GO:0042866 | pyruvate biosynthetic process | -3.5 | 3.3 | -2.2 |
| WP3646 | Hepatitis C and Hepatocellular Carcinoma | -3.5 | 4.6 | -2.2 |
| GO:0060760 | positive regulation of response to cytokine stimulus | -3.5 | 4.6 | -2.2 |
| R-HSA-168643 | Nucleotide-binding domain, leucine rich repeat containing receptor (NLR) signaling pathways | -3.5 | 4.6 | -2.2 |
| GO:0032620 | interleukin-17 production | -3.5 | 5.2 | -2.1 |
| WP364 | IL-6 signaling pathway | -3.5 | 5.2 | -2.1 |
| GO:0002791 | regulation of peptide secretion | -3.5 | 2.3 | -2.1 |
| GO:0002347 | response to tumor cell | -3.5 | 6.2 | -2.1 |
| GO:0019835 | cytolysis | -3.5 | 6.2 | -2.1 |
| GO:0046434 | organophosphate catabolic process | -3.5 | 2.4 | -2.1 |
| hsa04144 | Endocytosis | -3.4 | 2.4 | -2.1 |
| GO:1900544 | positive regulation of purine nucleotide metabolic process | -3.4 | 4.5 | -2.1 |
| GO:0045981 | positive regulation of nucleotide metabolic process | -3.4 | 4.5 | -2.1 |
| GO:2000379 | positive regulation of reactive oxygen species metabolic process | -3.4 | 3.4 | -2.1 |
| GO:0042136 | neurotransmitter biosynthetic process | -3.4 | 3.4 | -2.1 |
| GO:0046889 | positive regulation of lipid biosynthetic process | -3.4 | 3.7 | -2.1 |
| GO:0030656 | regulation of vitamin metabolic process | -3.4 | 11 | -2.1 |
| R-HSA-9020558 | Interleukin-2 signaling | -3.4 | 11 | -2.1 |
| GO:0033004 | negative regulation of mast cell activation | -3.4 | 11 | -2.1 |
| GO:0002863 | positive regulation of inflammatory response to antigenic stimulus | -3.4 | 11 | -2.1 |
| GO:0001867 | complement activation, lectin pathway | -3.4 | 11 | -2.1 |
| R-HSA-210990 | PECAM1 interactions | -3.4 | 11 | -2.1 |
| GO:0002903 | negative regulation of B cell apoptotic process | -3.4 | 11 | -2.1 |
| R-HSA-2029481 | FCGR activation | -3.4 | 11 | -2.1 |
| R-HSA-389359 | CD28 dependent Vav1 pathway | -3.4 | 11 | -2.1 |
| GO:0042368 | vitamin D biosynthetic process | -3.4 | 11 | -2.1 |
| GO:0034154 | toll-like receptor 7 signaling pathway | -3.4 | 11 | -2.1 |
| GO:0000904 | cell morphogenesis involved in differentiation | -3.4 | 1.8 | -2.1 |
| GO:0045862 | positive regulation of proteolysis | -3.4 | 2.1 | -2.1 |
| GO:0046496 | nicotinamide nucleotide metabolic process | -3.4 | 2.7 | -2.1 |
| GO:0060348 | bone development | -3.4 | 2.7 | -2.1 |
| GO:0006694 | steroid biosynthetic process | -3.4 | 2.7 | -2.1 |
| GO:0019362 | pyridine nucleotide metabolic process | -3.4 | 2.7 | -2.1 |
| GO:0035455 | response to interferon-alpha | -3.4 | 7.6 | -2.1 |
| GO:0046006 | regulation of activated T cell proliferation | -3.4 | 5.1 | -2.1 |
| hsa05143 | African trypanosomiasis | -3.4 | 5.1 | -2.1 |
| GO:0009100 | glycoprotein metabolic process | -3.4 | 2 | -2.1 |
| R-HSA-71387 | Metabolism of carbohydrates | -3.4 | 2.3 | -2.1 |
| GO:0051099 | positive regulation of binding | -3.4 | 2.7 | -2.1 |
| GO:0002861 | regulation of inflammatory response to antigenic stimulus | -3.4 | 6 | -2.1 |
| GO:0071353 | cellular response to interleukin-4 | -3.4 | 6 | -2.1 |
| GO:0010743 | regulation of macrophage derived foam cell differentiation | -3.4 | 6 | -2.1 |
| WP4149 | White fat cell differentiation | -3.4 | 6 | -2.1 |
| WP4900 | Purinergic signaling | -3.4 | 6 | -2.1 |
| WP254 | Apoptosis | -3.4 | 3.6 | -2.1 |
| hsa04979 | cholesterol metabolism | -3.4 | 4.4 | -2.1 |
| GO:0031400 | negative regulation of protein modification process | -3.4 | 1.8 | -2.1 |
| GO:0006809 | nitric oxide biosynthetic process | -3.4 | 4 | -2 |
| GO:0002753 | cytoplasmic pattern recognition receptor signaling pathway | -3.4 | 4 | -2 |
| GO:0007611 | learning or memory | -3.3 | 2.5 | -2 |
| GO:0014911 | positive regulation of smooth muscle cell migration | -3.3 | 5 | -2 |
| GO:1903901 | negative regulation of viral life cycle | -3.3 | 3.6 | -2 |
| GO:0097581 | lamellipodium organization | -3.3 | 3.6 | -2 |
| R-HSA-446652 | Interleukin-1 family signaling | -3.3 | 3 | -2 |
| GO:1903034 | regulation of response to wounding | -3.3 | 2.6 | -2 |
| R-HSA-3000171 | Non-integrin membrane-ECM interactions | -3.3 | 4.3 | -2 |
| GO:0046777 | protein autophosphorylation | -3.3 | 2.4 | -2 |
| WP4655 | Cytosolic DNA-sensing pathway | -3.3 | 3.9 | -2 |
| GO:0015914 | phospholipid transport | -3.3 | 3.9 | -2 |
| GO:0050869 | negative regulation of B cell activation | -3.3 | 5.8 | -2 |
| M233 | PID EPO PATHWAY | -3.3 | 5.8 | -2 |
| WP4496 | Signal transduction through IL1R | -3.3 | 5.8 | -2 |
| WP4786 | Type I collagen synthesis in the context of Osteogenesis imperfecta | -3.3 | 5.8 | -2 |
| GO:1904996 | positive regulation of leukocyte adhesion to vascular endothelial cell | -3.3 | 7.3 | -2 |
| GO:0050860 | negative regulation of T cell receptor signaling pathway | -3.3 | 7.3 | -2 |
| GO:1903306 | negative regulation of regulated secretory pathway | -3.3 | 7.3 | -2 |
| WP4961 | STING pathway in Kawasaki-like disease and COVID-19 | -3.3 | 7.3 | -2 |
| GO:0010888 | negative regulation of lipid storage | -3.3 | 7.3 | -2 |
| GO:0046165 | alcohol biosynthetic process | -3.3 | 2.8 | -2 |
| ko04024 | cAMP signaling pathway | -3.3 | 2.6 | -2 |
| GO:0019218 | regulation of steroid metabolic process | -3.3 | 3.1 | -2 |
| GO:1901617 | organic hydroxy compound biosynthetic process | -3.3 | 2.4 | -2 |
| GO:0071354 | cellular response to interleukin-6 | -3.3 | 4.9 | -2 |
| M198 | PID SYNDECAN 1 PATHWAY | -3.3 | 4.9 | -2 |
| WP4718 | Cholesterol metabolism (includes both Bloch and Kandutsch-Russell pathways) | -3.3 | 4.9 | -2 |
| GO:0043300 | regulation of leukocyte degranulation | -3.3 | 4.9 | -2 |
| GO:0051604 | protein maturation | -3.3 | 2 | -2 |
| GO:0005975 | carbohydrate metabolic process | -3.3 | 1.8 | -2 |
| GO:0002479 | antigen processing and presentation of exogenous peptide antigen via MHC class I, TAP-dependent | -3.3 | 3.8 | -2 |
| GO:0010745 | negative regulation of macrophage derived foam cell differentiation | -3.3 | 9.9 | -2 |
| GO:0002921 | negative regulation of humoral immune response | -3.3 | 9.9 | -2 |
| GO:0070424 | regulation of nucleotide-binding oligomerization domain containing signaling pathway | -3.3 | 9.9 | -2 |
| GO:0048302 | regulation of isotype switching to IgG isotypes | -3.3 | 9.9 | -2 |
| GO:0035745 | T-helper 2 cell cytokine production | -3.3 | 9.9 | -2 |
| WP3679 | Cell-type Dependent Selectivity of CCK2R Signaling | -3.3 | 9.9 | -2 |
| GO:1903977 | positive regulation of glial cell migration | -3.3 | 9.9 | -2 |
| GO:1903236 | regulation of leukocyte tethering or rolling | -3.3 | 9.9 | -2 |
| WP3892 | Development of pulmonary dendritic cells and macrophage subsets | -3.3 | 9.9 | -2 |
| GO:0002551 | mast cell chemotaxis | -3.3 | 9.9 | -2 |
| GO:0070997 | neuron death | -3.3 | 2.1 | -2 |
| R-HSA-8949275 | RUNX3 Regulates Immune Response and Cell Migration | -3.2 | 16 | -2 |
| R-HSA-173623 | Classical antibody-mediated complement activation | -3.2 | 16 | -2 |
| GO:0002860 | positive regulation of natural killer cell mediated cytotoxicity directed against tumor cell target | -3.2 | 16 | -2 |
| GO:0002583 | regulation of antigen processing and presentation of peptide antigen | -3.2 | 16 | -2 |
| GO:0060374 | mast cell differentiation | -3.2 | 16 | -2 |
| GO:0061304 | retinal blood vessel morphogenesis | -3.2 | 16 | -2 |
| GO:0043305 | negative regulation of mast cell degranulation | -3.2 | 16 | -2 |
| GO:0034157 | positive regulation of toll-like receptor 7 signaling pathway | -3.2 | 16 | -2 |
| GO:0048525 | negative regulation of viral process | -3.2 | 3.3 | -2 |
| ko04144 | Endocytosis | -3.2 | 2.3 | -2 |
| GO:0072524 | pyridine-containing compound metabolic process | -3.2 | 2.6 | -1.9 |
| GO:0016052 | carbohydrate catabolic process | -3.2 | 2.6 | -1.9 |
| WP4542 | Overview of leukocyte-intrinsic Hippo pathway functions | -3.2 | 5.7 | -1.9 |
| GO:0001960 | negative regulation of cytokine-mediated signaling pathway | -3.2 | 3.8 | -1.9 |
| R-HSA-3000178 | ECM proteoglycans | -3.2 | 3.8 | -1.9 |
| GO:0030225 | macrophage differentiation | -3.2 | 4.8 | -1.9 |
| WP2203 | Thymic Stromal LymphoPoietin (TSLP) Signaling Pathway | -3.2 | 4.8 | -1.9 |
| GO:1900274 | regulation of phospholipase C activity | -3.2 | 4.8 | -1.9 |
| GO:0030316 | osteoclast differentiation | -3.2 | 3.5 | -1.9 |
| WP2853 | Endoderm Differentiation | -3.2 | 2.9 | -1.9 |
| GO:0010560 | positive regulation of glycoprotein biosynthetic process | -3.2 | 7 | -1.9 |
| GO:0072677 | eosinophil migration | -3.2 | 7 | -1.9 |
| GO:0010738 | regulation of protein kinase A signaling | -3.2 | 7 | -1.9 |
| GO:0042359 | vitamin D metabolic process | -3.2 | 7 | -1.9 |
| GO:0042063 | gliogenesis | -3.2 | 2.3 | -1.9 |
| GO:0030856 | regulation of epithelial cell differentiation | -3.2 | 2.7 | -1.9 |
| GO:0030195 | negative regulation of blood coagulation | -3.2 | 4.7 | -1.9 |
| WP4534 | Mechanoregulation and pathology of YAP/TAZ via Hippo and non-Hippo mechanisms | -3.2 | 4.7 | -1.9 |
| R-HSA-512988 | Interleukin-3, Interleukin-5 and GM-CSF signaling | -3.2 | 4.7 | -1.9 |
| GO:0070670 | response to interleukin-4 | -3.2 | 5.5 | -1.9 |
| M197 | PID HIV NEF PATHWAY | -3.2 | 5.5 | -1.9 |
| GO:0009101 | glycoprotein biosynthetic process | -3.2 | 2.1 | -1.9 |
| GO:0019359 | nicotinamide nucleotide biosynthetic process | -3.2 | 2.9 | -1.9 |
| GO:0019363 | pyridine nucleotide biosynthetic process | -3.2 | 2.9 | -1.9 |
| GO:0034599 | cellular response to oxidative stress | -3.2 | 2.2 | -1.9 |
| GO:0045936 | negative regulation of phosphate metabolic process | -3.2 | 1.8 | -1.9 |
| GO:0050673 | epithelial cell proliferation | -3.1 | 2 | -1.9 |
| GO:0044706 | multi-multicellular organism process | -3.1 | 2.5 | -1.9 |
| GO:0010563 | negative regulation of phosphorus metabolic process | -3.1 | 1.8 | -1.9 |
| GO:0032970 | regulation of actin filament-based process | -3.1 | 2 | -1.9 |
| GO:0045006 | DNA deamination | -3.1 | 9.2 | -1.9 |
| GO:0048291 | isotype switching to IgG isotypes | -3.1 | 9.2 | -1.9 |
| GO:0070672 | response to interleukin-15 | -3.1 | 9.2 | -1.9 |
| GO:0001780 | neutrophil homeostasis | -3.1 | 9.2 | -1.9 |
| GO:0002864 | regulation of acute inflammatory response to antigenic stimulus | -3.1 | 9.2 | -1.9 |
| GO:0002371 | dendritic cell cytokine production | -3.1 | 9.2 | -1.9 |
| GO:0002638 | negative regulation of immunoglobulin production | -3.1 | 9.2 | -1.9 |
| GO:0097531 | mast cell migration | -3.1 | 9.2 | -1.9 |
| R-HSA-166786 | Creation of C4 and C2 activators | -3.1 | 9.2 | -1.9 |
| GO:0045667 | regulation of osteoblast differentiation | -3.1 | 3 | -1.9 |
| GO:0061448 | connective tissue development | -3.1 | 2.4 | -1.9 |
| ko04623 | Cytosolic DNA-sensing pathway | -3.1 | 4.1 | -1.9 |
| GO:0048469 | cell maturation | -3.1 | 2.7 | -1.9 |
| GO:0030336 | negative regulation of cell migration | -3.1 | 2.1 | -1.8 |
| GO:0040037 | negative regulation of fibroblast growth factor receptor signaling pathway | -3.1 | 6.7 | -1.8 |
| M264 | PID TOLL ENDOGENOUS PATHWAY | -3.1 | 6.7 | -1.8 |
| GO:0098581 | detection of external biotic stimulus | -3.1 | 6.7 | -1.8 |
| GO:0045821 | positive regulation of glycolytic process | -3.1 | 6.7 | -1.8 |
| GO:0046835 | carbohydrate phosphorylation | -3.1 | 6.7 | -1.8 |
| GO:0030318 | melanocyte differentiation | -3.1 | 6.7 | -1.8 |
| GO:0002418 | immune response to tumor cell | -3.1 | 6.7 | -1.8 |
| R-HSA-6783589 | Interleukin-6 family signaling | -3.1 | 6.7 | -1.8 |
| WP710 | DNA Damage Response (only ATM dependent) | -3.1 | 3.1 | -1.8 |
| GO:0001961 | positive regulation of cytokine-mediated signaling pathway | -3.1 | 4.6 | -1.8 |
| GO:1900047 | negative regulation of hemostasis | -3.1 | 4.6 | -1.8 |
| R-HSA-1222556 | ROS and RNS production in phagocytes | -3.1 | 5.3 | -1.8 |
| GO:2001171 | positive regulation of ATP biosynthetic process | -3.1 | 5.3 | -1.8 |
| M1315 | SIG PIP3 SIGNALING IN B LYMPHOCYTES | -3.1 | 5.3 | -1.8 |
| GO:0031331 | positive regulation of cellular catabolic process | -3.1 | 2 | -1.8 |
| GO:0021700 | developmental maturation | -3.1 | 2.3 | -1.8 |
| GO:0033344 | cholesterol efflux | -3.1 | 4 | -1.8 |
| hsa04623 | Cytosolic DNA-sensing pathway | -3.1 | 4 | -1.8 |
| GO:0016445 | somatic diversification of immunoglobulins | -3.1 | 4 | -1.8 |
| GO:0072525 | pyridine-containing compound biosynthetic process | -3.1 | 2.8 | -1.8 |
| GO:0015748 | organophosphate ester transport | -3.1 | 3.1 | -1.8 |
| hsa05168 | Herpes simplex virus 1 infection | -3.1 | 1.8 | -1.8 |
| GO:1902930 | regulation of alcohol biosynthetic process | -3.1 | 3.6 | -1.8 |
| GO:0042590 | antigen processing and presentation of exogenous peptide antigen via MHC class I | -3.1 | 3.6 | -1.8 |
| ko04913 | Ovarian steroidogenesis | -3.1 | 4.5 | -1.8 |
| GO:0070741 | response to interleukin-6 | -3.1 | 4.5 | -1.8 |
| GO:0008203 | cholesterol metabolic process | -3.1 | 2.8 | -1.8 |
| GO:0043112 | receptor metabolic process | -3.1 | 2.7 | -1.8 |
| GO:0006096 | glycolytic process | -3 | 3.1 | -1.8 |
| GO:0002223 | stimulatory C-type lectin receptor signaling pathway | -3 | 3.1 | -1.8 |
| GO:0006165 | nucleoside diphosphate phosphorylation | -3 | 2.9 | -1.8 |
| GO:0034381 | plasma lipoprotein particle clearance | -3 | 3.9 | -1.8 |
| R-HSA-3299685 | Detoxification of Reactive Oxygen Species | -3 | 5.2 | -1.8 |
| GO:0048143 | astrocyte activation | -3 | 6.4 | -1.8 |
| hsa00100 | Steroid biosynthesis | -3 | 6.4 | -1.8 |
| R-HSA-2029485 | Role of phospholipids in phagocytosis | -3 | 6.4 | -1.8 |
| GO:0001573 | ganglioside metabolic process | -3 | 6.4 | -1.8 |
| GO:0001783 | B cell apoptotic process | -3 | 6.4 | -1.8 |
| GO:0033622 | integrin activation | -3 | 6.4 | -1.8 |
| M5880 | NABA ECM AFFILIATED | -3 | 2.6 | -1.8 |
| GO:0060761 | negative regulation of response to cytokine stimulus | -3 | 3.6 | -1.8 |
| GO:0006757 | ATP generation from ADP | -3 | 3.1 | -1.8 |
| hsa04725 | Cholinergic synapse | -3 | 3.1 | -1.8 |
| GO:0006898 | receptor-mediated endocytosis | -3 | 2.1 | -1.8 |
| GO:0046939 | nucleotide phosphorylation | -3 | 2.9 | -1.8 |
| GO:0034155 | regulation of toll-like receptor 7 signaling pathway | -3 | 14 | -1.8 |
| GO:2000328 | regulation of T-helper 17 cell lineage commitment | -3 | 14 | -1.8 |
| GO:0035771 | interleukin-4-mediated signaling pathway | -3 | 14 | -1.8 |
| GO:0031580 | membrane raft distribution | -3 | 14 | -1.8 |
| GO:2000553 | positive regulation of T-helper 2 cell cytokine production | -3 | 14 | -1.8 |
| GO:0060558 | regulation of calcidiol 1-monooxygenase activity | -3 | 14 | -1.8 |
| GO:0002866 | positive regulation of acute inflammatory response to antigenic stimulus | -3 | 14 | -1.8 |
| CORUM:2529 | LAT-PLC-gamma-1-p85-GRB2-CBL-VAV-SLP-76 signaling complex, C305 activated | -3 | 14 | -1.8 |
| GO:0002857 | positive regulation of natural killer cell mediated immune response to tumor cell | -3 | 14 | -1.8 |
| GO:0010536 | positive regulation of activation of Janus kinase activity | -3 | 14 | -1.8 |
| GO:0002839 | positive regulation of immune response to tumor cell | -3 | 8.5 | -1.8 |
| GO:0051770 | positive regulation of nitric-oxide synthase biosynthetic process | -3 | 8.5 | -1.8 |
| GO:0002836 | positive regulation of response to tumor cell | -3 | 8.5 | -1.8 |
| M11736 | SA MMP CYTOKINE CONNECTION | -3 | 8.5 | -1.8 |
| GO:0072160 | nephron tubule epithelial cell differentiation | -3 | 8.5 | -1.8 |
| GO:0042362 | fat-soluble vitamin biosynthetic process | -3 | 8.5 | -1.8 |
| R-HSA-9706369 | Negative regulation of FLT3 | -3 | 8.5 | -1.8 |
| GO:0030852 | regulation of granulocyte differentiation | -3 | 8.5 | -1.8 |
| GO:0010820 | positive regulation of T cell chemotaxis | -3 | 8.5 | -1.8 |
| GO:0046007 | negative regulation of activated T cell proliferation | -3 | 8.5 | -1.8 |
| GO:0032645 | regulation of granulocyte macrophage colony-stimulating factor production | -3 | 8.5 | -1.8 |
| GO:0001659 | temperature homeostasis | -3 | 2.6 | -1.8 |
| WP4666 | Hepatitis B infection | -3 | 2.7 | -1.7 |
| GO:0048729 | tissue morphogenesis | -3 | 1.8 | -1.7 |
| GO:0001894 | tissue homeostasis | -3 | 2.4 | -1.7 |
| GO:0042130 | negative regulation of T cell proliferation | -3 | 3.9 | -1.7 |
| GO:0009166 | nucleotide catabolic process | -3 | 2.5 | -1.7 |
| GO:0006733 | oxidoreduction coenzyme metabolic process | -3 | 2.4 | -1.7 |
| M115 | PID REG GR PATHWAY | -3 | 3.5 | -1.7 |
| GO:0045913 | positive regulation of carbohydrate metabolic process | -3 | 3.5 | -1.7 |
| GO:0022617 | extracellular matrix disassembly | -3 | 3.5 | -1.7 |
| GO:0051493 | regulation of cytoskeleton organization | -3 | 1.8 | -1.7 |
| GO:0007610 | behavior | -3 | 1.8 | -1.7 |
| GO:0006090 | pyruvate metabolic process | -3 | 2.7 | -1.7 |
| GO:0002714 | positive regulation of B cell mediated immunity | -3 | 5.1 | -1.7 |
| GO:0002891 | positive regulation of immunoglobulin mediated immune response | -3 | 5.1 | -1.7 |
| GO:0045429 | positive regulation of nitric oxide biosynthetic process | -3 | 5.1 | -1.7 |
| R-HSA-9607240 | FLT3 Signaling | -3 | 5.1 | -1.7 |
| GO:0120032 | regulation of plasma membrane bounded cell projection assembly | -3 | 2.4 | -1.7 |
| GO:0007266 | Rho protein signal transduction | -3 | 2.8 | -1.7 |
| GO:0042542 | response to hydrogen peroxide | -3 | 2.8 | -1.7 |
| GO:0043113 | receptor clustering | -3 | 4.3 | -1.7 |
| M231 | PID KIT PATHWAY | -3 | 4.3 | -1.7 |
| GO:0050819 | negative regulation of coagulation | -3 | 4.3 | -1.7 |
| GO:0002820 | negative regulation of adaptive immune response | -3 | 4.3 | -1.7 |
| GO:1901623 | regulation of lymphocyte chemotaxis | -3 | 6.2 | -1.7 |
| GO:0046885 | regulation of hormone biosynthetic process | -3 | 6.2 | -1.7 |
| GO:1902932 | positive regulation of alcohol biosynthetic process | -3 | 6.2 | -1.7 |
| GO:0051197 | positive regulation of coenzyme metabolic process | -3 | 6.2 | -1.7 |
| WP530 | Cytokines and Inflammatory Response | -3 | 6.2 | -1.7 |
| GO:0048873 | homeostasis of number of cells within a tissue | -3 | 6.2 | -1.7 |
| GO:0030813 | positive regulation of nucleotide catabolic process | -3 | 6.2 | -1.7 |
| GO:1903020 | positive regulation of glycoprotein metabolic process | -3 | 6.2 | -1.7 |
| GO:0034162 | toll-like receptor 9 signaling pathway | -3 | 6.2 | -1.7 |
| R-HSA-1650814 | Collagen biosynthesis and modifying enzymes | -3 | 3.8 | -1.7 |
| GO:1902652 | secondary alcohol metabolic process | -3 | 2.7 | -1.7 |
| GO:0042446 | hormone biosynthetic process | -2.9 | 3.5 | -1.7 |
| GO:0060491 | regulation of cell projection assembly | -2.9 | 2.4 | -1.7 |
| GO:0034404 | nucleobase-containing small molecule biosynthetic process | -2.9 | 2.3 | -1.7 |
| GO:0070201 | regulation of establishment of protein localization | -2.9 | 1.8 | -1.7 |
| R-HSA-1483255 | PI Metabolism | -2.9 | 3.4 | -1.7 |
| GO:0032660 | regulation of interleukin-17 production | -2.9 | 4.9 | -1.7 |
| M156 | PID ECADHERIN NASCENT AJ PATHWAY | -2.9 | 4.9 | -1.7 |
| GO:0016601 | Rac protein signal transduction | -2.9 | 4.9 | -1.7 |
| GO:1904407 | positive regulation of nitric oxide metabolic process | -2.9 | 4.9 | -1.7 |
| GO:0030858 | positive regulation of epithelial cell differentiation | -2.9 | 3.8 | -1.7 |
| GO:0051223 | regulation of protein transport | -2.9 | 1.8 | -1.7 |
| GO:0050830 | defense response to Gram-positive bacterium | -2.9 | 3.2 | -1.7 |
| GO:0033209 | tumor necrosis factor-mediated signaling pathway | -2.9 | 2.6 | -1.7 |
| GO:0045779 | negative regulation of bone resorption | -2.9 | 8 | -1.7 |
| GO:0002830 | positive regulation of type 2 immune response | -2.9 | 8 | -1.7 |
| GO:0010819 | regulation of T cell chemotaxis | -2.9 | 8 | -1.7 |
| GO:0070431 | nucleotide-binding oligomerization domain containing 2 signaling pathway | -2.9 | 8 | -1.7 |
| GO:0072673 | lamellipodium morphogenesis | -2.9 | 8 | -1.7 |
| GO:0006310 | DNA recombination | -2.9 | 2.1 | -1.7 |
| GO:0010921 | regulation of phosphatase activity | -2.9 | 2.5 | -1.6 |
| GO:0006644 | phospholipid metabolic process | -2.9 | 1.9 | -1.6 |
| ko04210 | Apoptosis | -2.9 | 2.8 | -1.6 |
| GO:0045069 | regulation of viral genome replication | -2.9 | 3.1 | -1.6 |
| R-HSA-5668541 | TNFR2 non-canonical NF-kB pathway | -2.9 | 3.1 | -1.6 |
| GO:0097006 | regulation of plasma lipoprotein particle levels | -2.9 | 3.1 | -1.6 |
| R-HSA-5621480 | Dectin-2 family | -2.9 | 5.9 | -1.6 |
| GO:0032897 | negative regulation of viral transcription | -2.9 | 5.9 | -1.6 |
| GO:0033688 | regulation of osteoblast proliferation | -2.9 | 5.9 | -1.6 |
| GO:0061082 | myeloid leukocyte cytokine production | -2.9 | 5.9 | -1.6 |
| R-HSA-912526 | Interleukin receptor SHC signaling | -2.9 | 5.9 | -1.6 |
| GO:0010758 | regulation of macrophage chemotaxis | -2.9 | 5.9 | -1.6 |
| GO:0051346 | negative regulation of hydrolase activity | -2.9 | 1.9 | -1.6 |
| R-HSA-5673001 | RAF/MAP kinase cascade | -2.9 | 2.2 | -1.6 |
| hsa05161 | Hepatitis B | -2.9 | 2.5 | -1.6 |
| GO:1901215 | negative regulation of neuron death | -2.9 | 2.4 | -1.6 |
| WP585 | Interferon type I signaling pathways | -2.9 | 4.2 | -1.6 |
| GO:0002381 | immunoglobulin production involved in immunoglobulin mediated immune response | -2.9 | 4.2 | -1.6 |
| GO:0030199 | collagen fibril organization | -2.9 | 4.2 | -1.6 |
| GO:0043434 | response to peptide hormone | -2.8 | 1.9 | -1.6 |
| GO:1903531 | negative regulation of secretion by cell | -2.8 | 2.8 | -1.6 |
| R-HSA-9020702 | Interleukin-1 signaling | -2.8 | 3.1 | -1.6 |
| GO:0070498 | interleukin-1-mediated signaling pathway | -2.8 | 3.1 | -1.6 |
| GO:1903036 | positive regulation of response to wounding | -2.8 | 3.4 | -1.6 |
| GO:0031668 | cellular response to extracellular stimulus | -2.8 | 2.2 | -1.6 |
| GO:0001935 | endothelial cell proliferation | -2.8 | 2.4 | -1.6 |
| R-HSA-400253 | Circadian Clock | -2.8 | 3.7 | -1.6 |
| GO:0042742 | defense response to bacterium | -2.8 | 2 | -1.6 |
| GO:0046836 | glycolipid transport | -2.8 | 12 | -1.6 |
| GO:0002420 | natural killer cell mediated cytotoxicity directed against tumor cell target | -2.8 | 12 | -1.6 |
| GO:0002361 | CD4-positive, CD25-positive, alpha-beta regulatory T cell differentiation | -2.8 | 12 | -1.6 |
| GO:0070432 | regulation of nucleotide-binding oligomerization domain containing 2 signaling pathway | -2.8 | 12 | -1.6 |
| GO:0002634 | regulation of germinal center formation | -2.8 | 12 | -1.6 |
| GO:0032819 | positive regulation of natural killer cell proliferation | -2.8 | 12 | -1.6 |
| GO:2000510 | positive regulation of dendritic cell chemotaxis | -2.8 | 12 | -1.6 |
| GO:0051665 | membrane raft localization | -2.8 | 12 | -1.6 |
| GO:0002858 | regulation of natural killer cell mediated cytotoxicity directed against tumor cell target | -2.8 | 12 | -1.6 |
| GO:0035754 | B cell chemotaxis | -2.8 | 12 | -1.6 |
| GO:0033007 | negative regulation of mast cell activation involved in immune response | -2.8 | 12 | -1.6 |
| hsa04750 | inflammatory mediator regulation of trp channels | -2.8 | 3.1 | -1.6 |
| hsa04913 | Ovarian steroidogenesis | -2.8 | 4.1 | -1.6 |
| GO:1903428 | positive regulation of reactive oxygen species biosynthetic process | -2.8 | 4.1 | -1.6 |
| R-HSA-195258 | RHO GTPase Effectors | -2.8 | 2.1 | -1.6 |
| GO:0032703 | negative regulation of interleukin-2 production | -2.8 | 5.7 | -1.6 |
| GO:0048660 | regulation of smooth muscle cell proliferation | -2.8 | 2.6 | -1.6 |
| GO:0046636 | negative regulation of alpha-beta T cell activation | -2.8 | 4.7 | -1.6 |
| GO:0034383 | low-density lipoprotein particle clearance | -2.8 | 4.7 | -1.6 |
| GO:1901292 | nucleoside phosphate catabolic process | -2.8 | 2.4 | -1.6 |
| GO:1901136 | carbohydrate derivative catabolic process | -2.8 | 2.4 | -1.6 |
| GO:0150079 | negative regulation of neuroinflammatory response | -2.8 | 7.5 | -1.6 |
| GO:0033623 | regulation of integrin activation | -2.8 | 7.5 | -1.6 |
| GO:0150078 | positive regulation of neuroinflammatory response | -2.8 | 7.5 | -1.6 |
| GO:0010517 | regulation of phospholipase activity | -2.8 | 3.6 | -1.6 |
| ko04142 | Lysosome | -2.8 | 2.9 | -1.6 |
| GO:0051101 | regulation of DNA binding | -2.8 | 2.9 | -1.6 |
| GO:0035821 | modification of morphology or physiology of other organism | -2.8 | 2.6 | -1.6 |
| GO:0051129 | negative regulation of cellular component organization | -2.8 | 1.6 | -1.6 |
| GO:0050829 | defense response to Gram-negative bacterium | -2.8 | 3.3 | -1.6 |
| GO:0031529 | ruffle organization | -2.8 | 4 | -1.5 |
| M99 | PID TXA2PATHWAY | -2.8 | 4 | -1.5 |
| GO:0010883 | regulation of lipid storage | -2.8 | 4 | -1.5 |
| GO:0120039 | plasma membrane bounded cell projection morphogenesis | -2.8 | 1.7 | -1.5 |
| GO:0010038 | response to metal ion | -2.8 | 2 | -1.5 |
| GO:0048659 | smooth muscle cell proliferation | -2.8 | 2.6 | -1.5 |
| WP176 | Folate Metabolism | -2.7 | 3.6 | -1.5 |
| GO:0048708 | astrocyte differentiation | -2.7 | 3.6 | -1.5 |
| GO:0016072 | rRNA metabolic process | -2.7 | 2.2 | -1.5 |
| ko04020 | Calcium signaling pathway | -2.7 | 2.5 | -1.5 |
| GO:1905330 | regulation of morphogenesis of an epithelium | -2.7 | 2.5 | -1.5 |
| GO:0032956 | regulation of actin cytoskeleton organization | -2.7 | 2 | -1.5 |
| GO:0033135 | regulation of peptidyl-serine phosphorylation | -2.7 | 2.7 | -1.5 |
| GO:0008037 | cell recognition | -2.7 | 2.3 | -1.5 |
| GO:0014002 | astrocyte development | -2.7 | 4.6 | -1.5 |
| GO:0045687 | positive regulation of glial cell differentiation | -2.7 | 4.6 | -1.5 |
| GO:0046879 | hormone secretion | -2.7 | 2.1 | -1.5 |
| GO:1901264 | carbohydrate derivative transport | -2.7 | 3.2 | -1.5 |
| R-HSA-5669034 | TNFs bind their physiological receptors | -2.7 | 5.5 | -1.5 |
| WP2361 | Gastric Cancer Network 1 | -2.7 | 5.5 | -1.5 |
| WP3869 | Cannabinoid receptor signaling | -2.7 | 5.5 | -1.5 |
| GO:0006517 | protein deglycosylation | -2.7 | 5.5 | -1.5 |
| GO:0061041 | regulation of wound healing | -2.7 | 2.6 | -1.5 |
| GO:0001952 | regulation of cell-matrix adhesion | -2.7 | 2.8 | -1.5 |
| GO:1903578 | regulation of ATP metabolic process | -2.7 | 2.8 | -1.5 |
| GO:0046031 | ADP metabolic process | -2.7 | 2.8 | -1.5 |
| GO:0001649 | osteoblast differentiation | -2.7 | 2.3 | -1.5 |
| WP2380 | Brain-Derived Neurotrophic Factor (BDNF) signaling pathway | -2.7 | 2.7 | -1.5 |
| GO:0120161 | regulation of cold-induced thermogenesis | -2.7 | 2.7 | -1.5 |
| GO:0106106 | cold-induced thermogenesis | -2.7 | 2.7 | -1.5 |
| GO:0048858 | cell projection morphogenesis | -2.7 | 1.7 | -1.5 |
| R-HSA-447115 | Interleukin-12 family signaling | -2.7 | 3.9 | -1.5 |
| GO:0090303 | positive regulation of wound healing | -2.7 | 3.5 | -1.5 |
| GO:0090066 | regulation of anatomical structure size | -2.7 | 1.8 | -1.5 |
| ko05414 | Dilated cardiomyopathy | -2.7 | 3.2 | -1.5 |
| R-HSA-1474290 | Collagen formation | -2.7 | 3.2 | -1.5 |
| GO:0006911 | phagocytosis, engulfment | -2.7 | 2.8 | -1.5 |
| R-HSA-2243919 | Crosslinking of collagen fibrils | -2.7 | 7.1 | -1.5 |
| GO:0034435 | cholesterol esterification | -2.7 | 7.1 | -1.5 |
| GO:0010885 | regulation of cholesterol storage | -2.7 | 7.1 | -1.5 |
| GO:0002837 | regulation of immune response to tumor cell | -2.7 | 7.1 | -1.5 |
| GO:0046851 | negative regulation of bone remodeling | -2.7 | 7.1 | -1.5 |
| GO:0002834 | regulation of response to tumor cell | -2.7 | 7.1 | -1.5 |
| WP4337 | ncRNAs involved in STAT3 signaling in hepatocellular carcinoma | -2.7 | 7.1 | -1.5 |
| GO:0034433 | steroid esterification | -2.7 | 7.1 | -1.5 |
| GO:0034434 | sterol esterification | -2.7 | 7.1 | -1.5 |
| GO:0034375 | high-density lipoprotein particle remodeling | -2.7 | 7.1 | -1.5 |
| GO:0070269 | pyroptosis | -2.7 | 7.1 | -1.5 |
| GO:0032740 | positive regulation of interleukin-17 production | -2.7 | 7.1 | -1.5 |
| R-HSA-1489509 | DAG and IP3 signaling | -2.7 | 4.5 | -1.5 |
| M222 | PID CXCR3 PATHWAY | -2.7 | 4.5 | -1.5 |
| GO:0045454 | cell redox homeostasis | -2.7 | 4.5 | -1.5 |
| GO:0070266 | necroptotic process | -2.7 | 4.5 | -1.5 |
| hsa04024 | cAMP signaling pathway | -2.7 | 2.3 | -1.5 |
| GO:0010950 | positive regulation of endopeptidase activity | -2.7 | 2.4 | -1.5 |
| GO:0051216 | cartilage development | -2.7 | 2.4 | -1.5 |
| GO:0030865 | cortical cytoskeleton organization | -2.7 | 3.9 | -1.5 |
| GO:0071260 | cellular response to mechanical stimulus | -2.7 | 3.5 | -1.5 |
| GO:0045471 | response to ethanol | -2.7 | 2.8 | -1.5 |
| GO:0046890 | regulation of lipid biosynthetic process | -2.7 | 2.3 | -1.5 |
| hsa04020 | Calcium signaling pathway | -2.7 | 2.3 | -1.5 |
| R-HSA-975138 | TRAF6 mediated induction of NFkB and MAP kinases upon TLR7/8 or 9 activation | -2.7 | 3.2 | -1.5 |
| GO:0002790 | peptide secretion | -2.7 | 1.9 | -1.5 |
| GO:0006362 | transcription elongation from RNA polymerase I promoter | -2.7 | 5.3 | -1.5 |
| GO:0042454 | ribonucleoside catabolic process | -2.7 | 5.3 | -1.5 |
| GO:0070102 | interleukin-6-mediated signaling pathway | -2.7 | 5.3 | -1.5 |
| M83 | PID CDC42 REG PATHWAY | -2.7 | 5.3 | -1.5 |
| GO:0048304 | positive regulation of isotype switching to IgG isotypes | -2.7 | 11 | -1.5 |
| R-HSA-9020933 | Interleukin-23 signaling | -2.7 | 11 | -1.5 |
| GO:0045916 | negative regulation of complement activation | -2.7 | 11 | -1.5 |
| GO:0001865 | NK T cell differentiation | -2.7 | 11 | -1.5 |
| GO:0002855 | regulation of natural killer cell mediated immune response to tumor cell | -2.7 | 11 | -1.5 |
| GO:0034112 | positive regulation of homotypic cell-cell adhesion | -2.7 | 11 | -1.5 |
| GO:0002370 | natural killer cell cytokine production | -2.7 | 11 | -1.5 |
| R-HSA-112411 | MAPK1 (ERK2) activation | -2.7 | 11 | -1.5 |
| GO:0010533 | regulation of activation of Janus kinase activity | -2.7 | 11 | -1.5 |
| GO:2000258 | negative regulation of protein activation cascade | -2.7 | 11 | -1.5 |
| GO:0038155 | interleukin-23-mediated signaling pathway | -2.7 | 11 | -1.5 |
| GO:0002423 | natural killer cell mediated immune response to tumor cell | -2.7 | 11 | -1.5 |
| GO:0002727 | regulation of natural killer cell cytokine production | -2.7 | 11 | -1.5 |
| GO:0043382 | positive regulation of memory T cell differentiation | -2.7 | 11 | -1.5 |
| GO:0045165 | cell fate commitment | -2.6 | 2.2 | -1.5 |
| GO:0006364 | rRNA processing | -2.6 | 2.2 | -1.5 |
| GO:0032479 | regulation of type I interferon production | -2.6 | 2.8 | -1.5 |
| R-HSA-975155 | MyD88 dependent cascade initiated on endosome | -2.6 | 3.1 | -1.4 |
| GO:0010863 | positive regulation of phospholipase C activity | -2.6 | 4.4 | -1.4 |
| GO:0035987 | endodermal cell differentiation | -2.6 | 4.4 | -1.4 |
| GO:0045124 | regulation of bone resorption | -2.6 | 4.4 | -1.4 |
| GO:0033003 | regulation of mast cell activation | -2.6 | 4.4 | -1.4 |
| WP2332 | Interleukin-11 Signaling Pathway | -2.6 | 4.4 | -1.4 |
| GO:0090311 | regulation of protein deacetylation | -2.6 | 4.4 | -1.4 |
| GO:0045428 | regulation of nitric oxide biosynthetic process | -2.6 | 3.8 | -1.4 |
| GO:0030301 | cholesterol transport | -2.6 | 2.9 | -1.4 |
| GO:0098739 | import across plasma membrane | -2.6 | 2.6 | -1.4 |
| GO:0032606 | type I interferon production | -2.6 | 2.7 | -1.4 |
| GO:0019079 | viral genome replication | -2.6 | 2.7 | -1.4 |
| GO:0030041 | actin filament polymerization | -2.6 | 2.4 | -1.4 |
| hsa04217 | necroptosis | -2.6 | 2.5 | -1.4 |
| GO:0007188 | adenylate cyclase-modulating G protein-coupled receptor signaling pathway | -2.6 | 2.2 | -1.4 |
| R-HSA-168181 | Toll Like Receptor 7/8 (TLR7/8) Cascade | -2.6 | 3.1 | -1.4 |
| WP35 | G Protein Signaling Pathways | -2.6 | 3.1 | -1.4 |
| R-HSA-8964038 | LDL clearance | -2.6 | 6.7 | -1.4 |
| GO:0048245 | eosinophil chemotaxis | -2.6 | 6.7 | -1.4 |
| R-HSA-3000480 | Scavenging by Class A Receptors | -2.6 | 6.7 | -1.4 |
| GO:0045618 | positive regulation of keratinocyte differentiation | -2.6 | 6.7 | -1.4 |
| GO:0046629 | gamma-delta T cell activation | -2.6 | 6.7 | -1.4 |
| GO:1903975 | regulation of glial cell migration | -2.6 | 6.7 | -1.4 |
| R-HSA-8963898 | Plasma lipoprotein assembly | -2.6 | 6.7 | -1.4 |
| R-HSA-5686938 | Regulation of TLR by endogenous ligand | -2.6 | 6.7 | -1.4 |
| WP3287 | Overview of nanoparticle effects | -2.6 | 6.7 | -1.4 |
| GO:0006491 | N-glycan processing | -2.6 | 6.7 | -1.4 |
| WP2037 | Prolactin Signaling Pathway | -2.6 | 3.4 | -1.4 |
| GO:0045920 | negative regulation of exocytosis | -2.6 | 5.2 | -1.4 |
| GO:0035456 | response to interferon-beta | -2.6 | 5.2 | -1.4 |
| ko00052 | Galactose metabolism | -2.6 | 5.2 | -1.4 |
| M63 | PID AVB3 OPN PATHWAY | -2.6 | 5.2 | -1.4 |
| GO:0002230 | positive regulation of defense response to virus by host | -2.6 | 5.2 | -1.4 |
| GO:0006363 | termination of RNA polymerase I transcription | -2.6 | 5.2 | -1.4 |
| WP536 | Calcium Regulation in the Cardiac Cell | -2.6 | 2.6 | -1.4 |
| GO:0038095 | Fc-epsilon receptor signaling pathway | -2.6 | 2.5 | -1.4 |
| GO:0034504 | protein localization to nucleus | -2.6 | 2.1 | -1.4 |
| GO:0010518 | positive regulation of phospholipase activity | -2.6 | 3.7 | -1.4 |
| GO:0048762 | mesenchymal cell differentiation | -2.6 | 2.2 | -1.4 |
| GO:0035303 | regulation of dephosphorylation | -2.6 | 2.3 | -1.4 |
| GO:0042551 | neuron maturation | -2.6 | 4.3 | -1.4 |
| GO:0034142 | toll-like receptor 4 signaling pathway | -2.6 | 4.3 | -1.4 |
| GO:0002639 | positive regulation of immunoglobulin production | -2.6 | 4.3 | -1.4 |
| GO:0042133 | neurotransmitter metabolic process | -2.6 | 2.6 | -1.4 |
| GO:0042632 | cholesterol homeostasis | -2.6 | 3.1 | -1.4 |
| GO:0050810 | regulation of steroid biosynthetic process | -2.6 | 3.1 | -1.4 |
| R-HSA-168164 | Toll Like Receptor 3 (TLR3) Cascade | -2.6 | 3.1 | -1.4 |
| GO:0042326 | negative regulation of phosphorylation | -2.6 | 1.8 | -1.4 |
| GO:0046683 | response to organophosphorus | -2.6 | 2.7 | -1.4 |
| GO:0002200 | somatic diversification of immune receptors | -2.6 | 3.3 | -1.4 |
| R-HSA-382551 | Transport of small molecules | -2.6 | 1.6 | -1.4 |
| GO:0090130 | tissue migration | -2.6 | 1.9 | -1.4 |
| GO:0046578 | regulation of Ras protein signal transduction | -2.6 | 2.3 | -1.4 |
| GO:0032990 | cell part morphogenesis | -2.6 | 1.7 | -1.4 |
| hsa04210 | Apoptosis | -2.5 | 2.5 | -1.4 |
| GO:2000351 | regulation of endothelial cell apoptotic process | -2.5 | 3.7 | -1.4 |
| R-HSA-6790901 | rRNA modification in the nucleus and cytosol | -2.5 | 3.7 | -1.4 |
| GO:1905953 | negative regulation of lipid localization | -2.5 | 3.7 | -1.4 |
| GO:0043388 | positive regulation of DNA binding | -2.5 | 3.7 | -1.4 |
| hsa04931 | insulin resistance | -2.5 | 2.8 | -1.4 |
| hsa04928 | parathyroid hormone synthesis, secretion and action | -2.5 | 2.8 | -1.4 |
| GO:0055092 | sterol homeostasis | -2.5 | 3 | -1.4 |
| GO:0010522 | regulation of calcium ion transport into cytosol | -2.5 | 3 | -1.4 |
| GO:0030522 | intracellular receptor signaling pathway | -2.5 | 2.1 | -1.4 |
| GO:0002323 | natural killer cell activation involved in immune response | -2.5 | 5 | -1.4 |
| GO:2000515 | negative regulation of CD4-positive, alpha-beta T cell activation | -2.5 | 5 | -1.4 |
| GO:0001881 | receptor recycling | -2.5 | 5 | -1.4 |
| R-HSA-73863 | RNA Polymerase I Transcription Termination | -2.5 | 5 | -1.4 |
| WP2911 | miRNA targets in ECM and membrane receptors | -2.5 | 4.2 | -1.4 |
| GO:1900373 | positive regulation of purine nucleotide biosynthetic process | -2.5 | 4.2 | -1.4 |
| GO:0030810 | positive regulation of nucleotide biosynthetic process | -2.5 | 4.2 | -1.4 |
| GO:0009914 | hormone transport | -2.5 | 2 | -1.4 |
| GO:0048732 | gland development | -2.5 | 1.9 | -1.4 |
| GO:0001101 | response to acid chemical | -2.5 | 2 | -1.3 |
| GO:0051769 | regulation of nitric-oxide synthase biosynthetic process | -2.5 | 6.4 | -1.3 |
| GO:0034104 | negative regulation of tissue remodeling | -2.5 | 6.4 | -1.3 |
| GO:0051767 | nitric-oxide synthase biosynthetic process | -2.5 | 6.4 | -1.3 |
| GO:0032816 | positive regulation of natural killer cell activation | -2.5 | 6.4 | -1.3 |
| GO:0010893 | positive regulation of steroid biosynthetic process | -2.5 | 6.4 | -1.3 |
| GO:0006925 | inflammatory cell apoptotic process | -2.5 | 6.4 | -1.3 |
| GO:0046597 | negative regulation of viral entry into host cell | -2.5 | 6.4 | -1.3 |
| GO:0007252 | I-kappaB phosphorylation | -2.5 | 6.4 | -1.3 |
| GO:0032823 | regulation of natural killer cell differentiation | -2.5 | 9.6 | -1.3 |
| GO:0070383 | DNA cytosine deamination | -2.5 | 9.6 | -1.3 |
| GO:2000659 | regulation of interleukin-1-mediated signaling pathway | -2.5 | 9.6 | -1.3 |
| CORUM:304 | SRCAP-associated chromatin remodeling complex | -2.5 | 9.6 | -1.3 |
| R-HSA-110056 | MAPK3 (ERK1) activation | -2.5 | 9.6 | -1.3 |
| GO:2000508 | regulation of dendritic cell chemotaxis | -2.5 | 9.6 | -1.3 |
| GO:0014041 | regulation of neuron maturation | -2.5 | 9.6 | -1.3 |
| GO:0046886 | positive regulation of hormone biosynthetic process | -2.5 | 9.6 | -1.3 |
| R-HSA-8877330 | RUNX1 and FOXP3 control the development of regulatory T lymphocytes (Tregs) | -2.5 | 9.6 | -1.3 |
| R-HSA-168138 | Toll Like Receptor 9 (TLR9) Cascade | -2.5 | 3 | -1.3 |
| GO:0043270 | positive regulation of ion transport | -2.5 | 2.1 | -1.3 |
| GO:2001235 | positive regulation of apoptotic signaling pathway | -2.5 | 2.4 | -1.3 |
| GO:1990845 | adaptive thermogenesis | -2.5 | 2.5 | -1.3 |
| GO:0032535 | regulation of cellular component size | -2.5 | 1.9 | -1.3 |
| GO:0006110 | regulation of glycolytic process | -2.5 | 3.2 | -1.3 |
| GO:0008154 | actin polymerization or depolymerization | -2.5 | 2.2 | -1.3 |
| GO:0030004 | cellular monovalent inorganic cation homeostasis | -2.5 | 2.8 | -1.3 |
| GO:0002823 | negative regulation of adaptive immune response based on somatic recombination of immune receptors built from immunoglobulin superfamily domains | -2.5 | 4.1 | -1.3 |
| GO:0007157 | heterophilic cell-cell adhesion via plasma membrane cell adhesion molecules | -2.5 | 4.1 | -1.3 |
| GO:0070848 | response to growth factor | -2.5 | 1.6 | -1.3 |
| GO:0120162 | positive regulation of cold-induced thermogenesis | -2.5 | 3 | -1.3 |
| GO:2001236 | regulation of extrinsic apoptotic signaling pathway | -2.5 | 2.5 | -1.3 |
| GO:2001056 | positive regulation of cysteine-type endopeptidase activity | -2.5 | 2.5 | -1.3 |
| GO:0010817 | regulation of hormone levels | -2.5 | 1.7 | -1.3 |
| GO:0035025 | positive regulation of Rho protein signal transduction | -2.5 | 4.9 | -1.3 |
| GO:0051482 | positive regulation of cytosolic calcium ion concentration involved in phospholipase C-activating G protein-coupled signaling pathway | -2.5 | 4.9 | -1.3 |
| ko00051 | Fructose and mannose metabolism | -2.5 | 4.9 | -1.3 |
| WP3995 | Prion disease pathway | -2.5 | 4.9 | -1.3 |
| GO:0033687 | osteoblast proliferation | -2.5 | 4.9 | -1.3 |
| R-HSA-389356 | CD28 co-stimulation | -2.5 | 4.9 | -1.3 |
| WP4874 | CAMKK2 Pathway | -2.5 | 4.9 | -1.3 |
| R-HSA-5663202 | Diseases of signal transduction by growth factor receptors and second messengers | -2.5 | 1.9 | -1.3 |
| GO:0006470 | protein dephosphorylation | -2.5 | 2 | -1.3 |
| GO:0072330 | monocarboxylic acid biosynthetic process | -2.5 | 1.9 | -1.3 |
| WP4329 | miRNAs involvement in the immune response in sepsis | -2.5 | 3.6 | -1.3 |
| GO:0045071 | negative regulation of viral genome replication | -2.5 | 3.6 | -1.3 |
| hsa04142 | Lysosome | -2.5 | 2.6 | -1.3 |
| GO:0043524 | negative regulation of neuron apoptotic process | -2.5 | 2.6 | -1.3 |
| GO:0099024 | plasma membrane invagination | -2.5 | 2.6 | -1.3 |
| GO:0051186 | cofactor metabolic process | -2.5 | 1.7 | -1.3 |
| GO:0030449 | regulation of complement activation | -2.5 | 2.8 | -1.3 |
| ko04360 | Axon guidance | -2.5 | 2.4 | -1.3 |
| GO:1905952 | regulation of lipid localization | -2.5 | 2.4 | -1.3 |
| GO:0050688 | regulation of defense response to virus | -2.5 | 3.2 | -1.3 |
| GO:2000117 | negative regulation of cysteine-type endopeptidase activity | -2.5 | 3.2 | -1.3 |
| GO:0050708 | regulation of protein secretion | -2.5 | 2 | -1.3 |
| GO:0060191 | regulation of lipase activity | -2.4 | 2.9 | -1.3 |
| GO:1904035 | regulation of epithelial cell apoptotic process | -2.4 | 2.9 | -1.3 |
| GO:0034762 | regulation of transmembrane transport | -2.4 | 1.7 | -1.3 |
| WP2848 | Differentiation Pathway | -2.4 | 4 | -1.3 |
| GO:0002204 | somatic recombination of immunoglobulin genes involved in immune response | -2.4 | 4 | -1.3 |
| GO:0002208 | somatic diversification of immunoglobulins involved in immune response | -2.4 | 4 | -1.3 |
| GO:0045190 | isotype switching | -2.4 | 4 | -1.3 |
| hsa04926 | relaxin signaling pathway | -2.4 | 2.6 | -1.3 |
| GO:2000257 | regulation of protein activation cascade | -2.4 | 2.7 | -1.3 |
| GO:0007009 | plasma membrane organization | -2.4 | 2.7 | -1.3 |
| GO:1902656 | calcium ion import into cytosol | -2.4 | 6.1 | -1.3 |
| R-HSA-164938 | Nef-mediates down modulation of cell surface receptors by recruiting them to clathrin adapters | -2.4 | 6.1 | -1.3 |
| GO:0009110 | vitamin biosynthetic process | -2.4 | 6.1 | -1.3 |
| GO:0002320 | lymphoid progenitor cell differentiation | -2.4 | 6.1 | -1.3 |
| R-HSA-5621575 | CD209 (DC-SIGN) signaling | -2.4 | 6.1 | -1.3 |
| GO:0043523 | regulation of neuron apoptotic process | -2.4 | 2.3 | -1.3 |
| GO:0045670 | regulation of osteoclast differentiation | -2.4 | 3.5 | -1.3 |
| R-HSA-9679191 | Potential therapeutics for SARS | -2.4 | 3.2 | -1.3 |
| R-HSA-937061 | TRIF(TICAM1)-mediated TLR4 signaling | -2.4 | 2.9 | -1.3 |
| R-HSA-166166 | MyD88-independent TLR4 cascade | -2.4 | 2.9 | -1.3 |
| M30 | PID HDAC CLASSII PATHWAY | -2.4 | 4.7 | -1.3 |
| M177 | PID EPHA FWDPATHWAY | -2.4 | 4.7 | -1.3 |
| M143 | PID IL2 PI3K PATHWAY | -2.4 | 4.7 | -1.3 |
| M210 | PID IL8 CXCR2 PATHWAY | -2.4 | 4.7 | -1.3 |
| GO:0043516 | regulation of DNA damage response, signal transduction by p53 class mediator | -2.4 | 4.7 | -1.3 |
| GO:0050931 | pigment cell differentiation | -2.4 | 4.7 | -1.3 |
| GO:0060485 | mesenchyme development | -2.4 | 2 | -1.2 |
| WP286 | IL-3 Signaling Pathway | -2.4 | 3.9 | -1.2 |
| GO:0097300 | programmed necrotic cell death | -2.4 | 3.9 | -1.2 |
| GO:0030811 | regulation of nucleotide catabolic process | -2.4 | 3.1 | -1.2 |
| M3270 | ST INTEGRIN SIGNALING PATHWAY | -2.4 | 3.1 | -1.2 |
| WP2374 | Oncostatin M Signaling Pathway | -2.4 | 3.5 | -1.2 |
| GO:0009179 | purine ribonucleoside diphosphate metabolic process | -2.4 | 2.6 | -1.2 |
| GO:0009135 | purine nucleoside diphosphate metabolic process | -2.4 | 2.6 | -1.2 |
| hsa05414 | Dilated cardiomyopathy | -2.4 | 2.9 | -1.2 |
| GO:0060562 | epithelial tube morphogenesis | -2.4 | 2 | -1.2 |
| GO:0016127 | sterol catabolic process | -2.4 | 8.7 | -1.2 |
| GO:0035457 | cellular response to interferon-alpha | -2.4 | 8.7 | -1.2 |
| GO:2000392 | regulation of lamellipodium morphogenesis | -2.4 | 8.7 | -1.2 |
| M9174 | ST STAT3 PATHWAY | -2.4 | 8.7 | -1.2 |
| GO:0070757 | interleukin-35-mediated signaling pathway | -2.4 | 8.7 | -1.2 |
| GO:0006707 | cholesterol catabolic process | -2.4 | 8.7 | -1.2 |
| GO:0010623 | programmed cell death involved in cell development | -2.4 | 8.7 | -1.2 |
| GO:0061299 | retina vasculature morphogenesis in camera-type eye | -2.4 | 8.7 | -1.2 |
| GO:0033690 | positive regulation of osteoblast proliferation | -2.4 | 8.7 | -1.2 |
| M00101 | Cholesterol biosynthesis, squalene 2,3-epoxide => cholesterol | -2.4 | 8.7 | -1.2 |
| GO:0034163 | regulation of toll-like receptor 9 signaling pathway | -2.4 | 8.7 | -1.2 |
| R-HSA-400451 | Free fatty acids regulate insulin secretion | -2.4 | 8.7 | -1.2 |
| hsa_M00101 | Cholesterol biosynthesis, squalene 2,3-epoxide => cholesterol | -2.4 | 8.7 | -1.2 |
| GO:0043666 | regulation of phosphoprotein phosphatase activity | -2.4 | 2.7 | -1.2 |
| GO:1904019 | epithelial cell apoptotic process | -2.4 | 2.7 | -1.2 |
| GO:0006956 | complement activation | -2.4 | 2.3 | -1.2 |
| GO:0007369 | gastrulation | -2.4 | 2.3 | -1.2 |
| hsa04530 | Tight junction | -2.4 | 2.3 | -1.2 |
| GO:0030010 | establishment of cell polarity | -2.4 | 2.5 | -1.2 |
| GO:0009132 | nucleoside diphosphate metabolic process | -2.4 | 2.4 | -1.2 |
| GO:0040036 | regulation of fibroblast growth factor receptor signaling pathway | -2.4 | 4.6 | -1.2 |
| GO:0045191 | regulation of isotype switching | -2.4 | 4.6 | -1.2 |
| GO:0010831 | positive regulation of myotube differentiation | -2.4 | 4.6 | -1.2 |
| ko05410 | Hypertrophic cardiomyopathy (HCM) | -2.4 | 3.1 | -1.2 |
| GO:1901224 | positive regulation of NIK/NF-kappaB signaling | -2.4 | 3.1 | -1.2 |
| R-HSA-1236974 | ER-Phagosome pathway | -2.4 | 3.1 | -1.2 |
| WP4300 | Extracellular vesicles in the crosstalk of cardiac cells | -2.4 | 5.8 | -1.2 |
| WP4141 | PI3K/AKT/mTOR - VitD3 Signalling | -2.4 | 5.8 | -1.2 |
| R-HSA-389357 | CD28 dependent PI3K/Akt signaling | -2.4 | 5.8 | -1.2 |
| GO:0001911 | negative regulation of leukocyte mediated cytotoxicity | -2.4 | 5.8 | -1.2 |
| GO:0043371 | negative regulation of CD4-positive, alpha-beta T cell differentiation | -2.4 | 5.8 | -1.2 |
| GO:0045624 | positive regulation of T-helper cell differentiation | -2.4 | 5.8 | -1.2 |
| GO:0051155 | positive regulation of striated muscle cell differentiation | -2.4 | 3.4 | -1.2 |
| GO:0072577 | endothelial cell apoptotic process | -2.4 | 3.4 | -1.2 |
| GO:0046782 | regulation of viral transcription | -2.4 | 3.4 | -1.2 |
| GO:0061515 | myeloid cell development | -2.4 | 3.4 | -1.2 |
| GO:0031214 | biomineral tissue development | -2.3 | 2.4 | -1.2 |
| WP706 | Sudden Infant Death Syndrome (SIDS) Susceptibility Pathways | -2.3 | 2.4 | -1.2 |
| GO:0010631 | epithelial cell migration | -2.3 | 1.9 | -1.2 |
| GO:0046883 | regulation of hormone secretion | -2.3 | 2 | -1.2 |
| GO:0010951 | negative regulation of endopeptidase activity | -2.3 | 2.1 | -1.2 |
| GO:0051193 | regulation of cofactor metabolic process | -2.3 | 2.6 | -1.2 |
| GO:0010811 | positive regulation of cell-substrate adhesion | -2.3 | 2.6 | -1.2 |
| R-HSA-9675108 | Nervous system development | -2.3 | 1.7 | -1.2 |
| GO:0048608 | reproductive structure development | -2.3 | 1.8 | -1.2 |
| GO:2001234 | negative regulation of apoptotic signaling pathway | -2.3 | 2.1 | -1.2 |
| GO:0002244 | hematopoietic progenitor cell differentiation | -2.3 | 2.4 | -1.2 |
| GO:0009185 | ribonucleoside diphosphate metabolic process | -2.3 | 2.5 | -1.2 |
| GO:0006687 | glycosphingolipid metabolic process | -2.3 | 3.3 | -1.2 |
| GO:0010812 | negative regulation of cell-substrate adhesion | -2.3 | 3.3 | -1.2 |
| GO:0072376 | protein activation cascade | -2.3 | 2.2 | -1.2 |
| GO:0010952 | positive regulation of peptidase activity | -2.3 | 2.2 | -1.2 |
| GO:0033673 | negative regulation of kinase activity | -2.3 | 2 | -1.2 |
| R-HSA-5663213 | RHO GTPases Activate WASPs and WAVEs | -2.3 | 4.5 | -1.2 |
| GO:0010718 | positive regulation of epithelial to mesenchymal transition | -2.3 | 3.8 | -1.2 |
| GO:0046850 | regulation of bone remodeling | -2.3 | 3.8 | -1.2 |
| R-HSA-3928665 | EPH-ephrin mediated repulsion of cells | -2.3 | 3.8 | -1.2 |
| GO:0034101 | erythrocyte homeostasis | -2.3 | 2.6 | -1.2 |
| GO:0090132 | epithelium migration | -2.3 | 1.9 | -1.2 |
| GO:0044344 | cellular response to fibroblast growth factor stimulus | -2.3 | 2.5 | -1.2 |
| R-HSA-168176 | Toll Like Receptor 5 (TLR5) Cascade | -2.3 | 3 | -1.2 |
| R-HSA-168142 | Toll Like Receptor 10 (TLR10) Cascade | -2.3 | 3 | -1.2 |
| GO:0035023 | regulation of Rho protein signal transduction | -2.3 | 3 | -1.2 |
| R-HSA-975871 | MyD88 cascade initiated on plasma membrane | -2.3 | 3 | -1.2 |
| GO:0061458 | reproductive system development | -2.3 | 1.8 | -1.2 |
| GO:0034660 | ncRNA metabolic process | -2.3 | 1.7 | -1.2 |
| GO:0002693 | positive regulation of cellular extravasation | -2.3 | 5.6 | -1.2 |
| GO:2000353 | positive regulation of endothelial cell apoptotic process | -2.3 | 5.6 | -1.2 |
| GO:0001919 | regulation of receptor recycling | -2.3 | 5.6 | -1.2 |
| GO:0034695 | response to prostaglandin E | -2.3 | 5.6 | -1.2 |
| GO:0051043 | regulation of membrane protein ectodomain proteolysis | -2.3 | 5.6 | -1.2 |
| GO:0060706 | cell differentiation involved in embryonic placenta development | -2.3 | 5.6 | -1.2 |
| WP545 | Complement Activation | -2.3 | 5.6 | -1.2 |
| GO:0045685 | regulation of glial cell differentiation | -2.3 | 3.3 | -1.2 |
| GO:0043393 | regulation of protein binding | -2.3 | 2.2 | -1.2 |
| GO:0015918 | sterol transport | -2.3 | 2.6 | -1.2 |
| R-HSA-196849 | Metabolism of water-soluble vitamins and cofactors | -2.3 | 2.6 | -1.2 |
| GO:0071363 | cellular response to growth factor stimulus | -2.3 | 1.6 | -1.2 |
| GO:0006885 | regulation of pH | -2.3 | 2.8 | -1.2 |
| GO:0002062 | chondrocyte differentiation | -2.3 | 2.8 | -1.2 |
| GO:0010324 | membrane invagination | -2.3 | 2.5 | -1.1 |
| GO:0038110 | interleukin-2-mediated signaling pathway | -2.3 | 8 | -1.1 |
| GO:0032490 | detection of molecule of bacterial origin | -2.3 | 8 | -1.1 |
| GO:0061430 | bone trabecula morphogenesis | -2.3 | 8 | -1.1 |
| GO:0006216 | cytidine catabolic process | -2.3 | 8 | -1.1 |
| GO:1901857 | positive regulation of cellular respiration | -2.3 | 8 | -1.1 |
| GO:0002713 | negative regulation of B cell mediated immunity | -2.3 | 8 | -1.1 |
| GO:0006002 | fructose 6-phosphate metabolic process | -2.3 | 8 | -1.1 |
| GO:0009972 | cytidine deamination | -2.3 | 8 | -1.1 |
| WP4495 | IL-10 Anti-inflammatory Signaling Pathway | -2.3 | 8 | -1.1 |
| GO:0046087 | cytidine metabolic process | -2.3 | 8 | -1.1 |
| GO:0002890 | negative regulation of immunoglobulin mediated immune response | -2.3 | 8 | -1.1 |
| GO:1902950 | regulation of dendritic spine maintenance | -2.3 | 8 | -1.1 |
| R-HSA-8984722 | Interleukin-35 Signalling | -2.3 | 8 | -1.1 |
| R-HSA-417957 | P2Y receptors | -2.3 | 8 | -1.1 |
| GO:0060707 | trophoblast giant cell differentiation | -2.3 | 8 | -1.1 |
| R-HSA-9634600 | Regulation of glycolysis by fructose 2,6-bisphosphate metabolism | -2.3 | 8 | -1.1 |
| GO:0070542 | response to fatty acid | -2.3 | 3 | -1.1 |
| GO:0050808 | synapse organization | -2.3 | 1.8 | -1.1 |
| GO:0008610 | lipid biosynthetic process | -2.3 | 1.6 | -1.1 |
| hsa04072 | Phospholipase D signaling pathway | -2.3 | 2.3 | -1.1 |
| GO:0019318 | hexose metabolic process | -2.3 | 2.1 | -1.1 |
| R-HSA-111997 | CaM pathway | -2.3 | 4.3 | -1.1 |
| R-HSA-111933 | Calmodulin induced events | -2.3 | 4.3 | -1.1 |
| GO:0051194 | positive regulation of cofactor metabolic process | -2.3 | 4.3 | -1.1 |
| GO:0009164 | nucleoside catabolic process | -2.3 | 4.3 | -1.1 |
| WP3614 | Photodynamic therapy-induced HIF-1 survival signaling | -2.3 | 4.3 | -1.1 |
| GO:0090322 | regulation of superoxide metabolic process | -2.3 | 4.3 | -1.1 |
| GO:0000462 | maturation of SSU-rRNA from tricistronic rRNA transcript (SSU-rRNA, 5.8S rRNA, LSU-rRNA) | -2.3 | 4.3 | -1.1 |
| GO:0000018 | regulation of DNA recombination | -2.2 | 2.7 | -1.1 |
| GO:0045666 | positive regulation of neuron differentiation | -2.2 | 1.8 | -1.1 |
| GO:0009896 | positive regulation of catabolic process | -2.2 | 1.7 | -1.1 |
| GO:0022604 | regulation of cell morphogenesis | -2.2 | 1.7 | -1.1 |
| WP2840 | Hair Follicle Development: Cytodifferentiation (Part 3 of 3) | -2.2 | 2.9 | -1.1 |
| GO:0007173 | epidermal growth factor receptor signaling pathway | -2.2 | 2.6 | -1.1 |
| GO:0043281 | regulation of cysteine-type endopeptidase activity involved in apoptotic process | -2.2 | 2.2 | -1.1 |
| GO:0120034 | positive regulation of plasma membrane bounded cell projection assembly | -2.2 | 2.7 | -1.1 |
| GO:0001706 | endoderm formation | -2.2 | 3.6 | -1.1 |
| GO:0071827 | plasma lipoprotein particle organization | -2.2 | 3.6 | -1.1 |
| M113 | PID NFAT 3PATHWAY | -2.2 | 3.6 | -1.1 |
| R-HSA-1660499 | Synthesis of PIPs at the plasma membrane | -2.2 | 3.6 | -1.1 |
| R-HSA-9664424 | Cell recruitment (pro-inflammatory response) | -2.2 | 5.3 | -1.1 |
| R-HSA-9660826 | Purinergic signaling in leishmaniasis infection | -2.2 | 5.3 | -1.1 |
| R-HSA-909733 | Interferon alpha/beta signaling | -2.2 | 3.2 | -1.1 |
| hsa04371 | Apelin signaling pathway | -2.2 | 2.4 | -1.1 |
| hsa05410 | Hypertrophic cardiomyopathy | -2.2 | 2.9 | -1.1 |
| GO:0034103 | regulation of tissue remodeling | -2.2 | 2.9 | -1.1 |
| R-HSA-418346 | Platelet homeostasis | -2.2 | 2.9 | -1.1 |
| GO:0001933 | negative regulation of protein phosphorylation | -2.2 | 1.7 | -1.1 |
| GO:0003091 | renal water homeostasis | -2.2 | 4.2 | -1.1 |
| M94 | PID FAS PATHWAY | -2.2 | 4.2 | -1.1 |
| R-HSA-8864260 | Transcriptional regulation by the AP-2 (TFAP2) family of transcription factors | -2.2 | 4.2 | -1.1 |
| GO:0006361 | transcription initiation from RNA polymerase I promoter | -2.2 | 4.2 | -1.1 |
| GO:0097242 | amyloid-beta clearance | -2.2 | 4.2 | -1.1 |
| GO:0048246 | macrophage chemotaxis | -2.2 | 4.2 | -1.1 |
| GO:0048286 | lung alveolus development | -2.2 | 4.2 | -1.1 |
| R-HSA-2129379 | Molecules associated with elastic fibres | -2.2 | 4.2 | -1.1 |
| GO:0032508 | DNA duplex unwinding | -2.2 | 2.7 | -1.1 |
| GO:1900542 | regulation of purine nucleotide metabolic process | -2.2 | 2.4 | -1.1 |
| GO:0038127 | ERBB signaling pathway | -2.2 | 2.4 | -1.1 |
| GO:0007411 | axon guidance | -2.2 | 2 | -1.1 |
| GO:0044764 | multi-organism cellular process | -2.2 | 3.6 | -1.1 |
| M278 | PID RAC1 PATHWAY | -2.2 | 3.6 | -1.1 |
| GO:0016447 | somatic recombination of immunoglobulin gene segments | -2.2 | 3.6 | -1.1 |
| R-HSA-70171 | Glycolysis | -2.2 | 3.2 | -1.1 |
| GO:0097485 | neuron projection guidance | -2.2 | 2 | -1.1 |
| GO:0051709 | regulation of killing of cells of other organism | -2.2 | 7.4 | -1.1 |
| WP4211 | Transcriptional cascade regulating adipogenesis | -2.2 | 7.4 | -1.1 |
| GO:0002923 | regulation of humoral immune response mediated by circulating immunoglobulin | -2.2 | 7.4 | -1.1 |
| CORUM:302 | INO80 chromatin remodeling complex | -2.2 | 7.4 | -1.1 |
| R-HSA-75205 | Dissolution of Fibrin Clot | -2.2 | 7.4 | -1.1 |
| GO:0072683 | T cell extravasation | -2.2 | 7.4 | -1.1 |
| R-HSA-1679131 | Trafficking and processing of endosomal TLR | -2.2 | 7.4 | -1.1 |
| GO:0072182 | regulation of nephron tubule epithelial cell differentiation | -2.2 | 7.4 | -1.1 |
| GO:0032725 | positive regulation of granulocyte macrophage colony-stimulating factor production | -2.2 | 7.4 | -1.1 |
| GO:0071352 | cellular response to interleukin-2 | -2.2 | 7.4 | -1.1 |
| GO:0033700 | phospholipid efflux | -2.2 | 7.4 | -1.1 |
| GO:0002829 | negative regulation of type 2 immune response | -2.2 | 7.4 | -1.1 |
| GO:0031274 | positive regulation of pseudopodium assembly | -2.2 | 7.4 | -1.1 |
| GO:0071350 | cellular response to interleukin-15 | -2.2 | 7.4 | -1.1 |
| GO:0035723 | interleukin-15-mediated signaling pathway | -2.2 | 7.4 | -1.1 |
| GO:0071774 | response to fibroblast growth factor | -2.2 | 2.4 | -1.1 |
| GO:1902275 | regulation of chromatin organization | -2.2 | 2.2 | -1.1 |
| GO:0023061 | signal release | -2.2 | 1.7 | -1.1 |
| GO:0030833 | regulation of actin filament polymerization | -2.2 | 2.3 | -1.1 |
| R-HSA-76009 | Platelet Aggregation (Plug Formation) | -2.2 | 4.1 | -1.1 |
| GO:0030501 | positive regulation of bone mineralization | -2.2 | 4.1 | -1.1 |
| R-HSA-111996 | Ca-dependent events | -2.2 | 4.1 | -1.1 |
| GO:0033081 | regulation of T cell differentiation in thymus | -2.2 | 5.1 | -1 |
| R-HSA-9006335 | Signaling by Erythropoietin | -2.2 | 5.1 | -1 |
| CORUM:5233 | TNF-alpha/NF-kappa B signaling complex 5 | -2.2 | 5.1 | -1 |
| GO:0031579 | membrane raft organization | -2.2 | 5.1 | -1 |
| GO:0043470 | regulation of carbohydrate catabolic process | -2.1 | 2.8 | -1 |
| ko04974 | Protein digestion and absorption | -2.1 | 2.8 | -1 |
| GO:0098586 | cellular response to virus | -2.1 | 3.1 | -1 |
| ko04520 | Adherens junction | -2.1 | 3.1 | -1 |
| WP2572 | Primary Focal Segmental Glomerulosclerosis FSGS | -2.1 | 3.1 | -1 |
| hsa04211 | Longevity regulating pathway | -2.1 | 2.6 | -1 |
| hsa04080 | Neuroactive ligand-receptor interaction | -2.1 | 1.8 | -1 |
| GO:0048260 | positive regulation of receptor-mediated endocytosis | -2.1 | 3.5 | -1 |
| GO:1902991 | regulation of amyloid precursor protein catabolic process | -2.1 | 3.5 | -1 |
| WP2018 | RANKL/RANK (Receptor activator of NFKB (ligand)) Signaling Pathway | -2.1 | 3.5 | -1 |
| R-HSA-112043 | PLC beta mediated events | -2.1 | 3.5 | -1 |
| GO:0010466 | negative regulation of peptidase activity | -2.1 | 2 | -1 |
| GO:0010469 | regulation of signaling receptor activity | -2.1 | 2.2 | -1 |
| ko04530 | Tight junction | -2.1 | 2.3 | -1 |
| M186 | PID PDGFRB PATHWAY | -2.1 | 2.5 | -1 |
| GO:1901361 | organic cyclic compound catabolic process | -2.1 | 1.5 | -1 |
| R-HSA-70326 | Glucose metabolism | -2.1 | 2.8 | -1 |
| GO:1900180 | regulation of protein localization to nucleus | -2.1 | 2.5 | -1 |
| GO:0060193 | positive regulation of lipase activity | -2.1 | 3.1 | -1 |
| GO:0031100 | animal organ regeneration | -2.1 | 3.1 | -1 |
| WP3941 | Oxidative Damage | -2.1 | 4 | -1 |
| GO:1904037 | positive regulation of epithelial cell apoptotic process | -2.1 | 4 | -1 |
| M3501 | ST B CELL ANTIGEN RECEPTOR | -2.1 | 4 | -1 |
| WP2526 | PDGF Pathway | -2.1 | 4 | -1 |
| GO:1905332 | positive regulation of morphogenesis of an epithelium | -2.1 | 4 | -1 |
| GO:0034470 | ncRNA processing | -2.1 | 1.8 | -1 |
| R-HSA-112040 | G-protein mediated events | -2.1 | 3.4 | -1 |
| GO:0006140 | regulation of nucleotide metabolic process | -2.1 | 2.3 | -1 |
| GO:0007187 | G protein-coupled receptor signaling pathway, coupled to cyclic nucleotide second messenger | -2.1 | 2 | -1 |
| R-HSA-111885 | Opioid Signalling | -2.1 | 2.8 | -1 |
| GO:0098659 | inorganic cation import across plasma membrane | -2.1 | 2.8 | -1 |
| GO:0099587 | inorganic ion import across plasma membrane | -2.1 | 2.8 | -1 |
| GO:0002719 | negative regulation of cytokine production involved in immune response | -2.1 | 4.9 | -1 |
| GO:2000108 | positive regulation of leukocyte apoptotic process | -2.1 | 4.9 | -1 |
| GO:0031342 | negative regulation of cell killing | -2.1 | 4.9 | -1 |
| GO:0046639 | negative regulation of alpha-beta T cell differentiation | -2.1 | 4.9 | -1 |
| GO:0019883 | antigen processing and presentation of endogenous antigen | -2.1 | 4.9 | -1 |
| GO:0042254 | ribosome biogenesis | -2.1 | 1.9 | -0.99 |
| GO:0071559 | response to transforming growth factor beta | -2.1 | 2 | -0.99 |
| M160 | PID AVB3 INTEGRIN PATHWAY | -2.1 | 3 | -0.99 |
| GO:0008277 | regulation of G protein-coupled receptor signaling pathway | -2.1 | 2.3 | -0.99 |
| GO:0031960 | response to corticosteroid | -2.1 | 2.3 | -0.99 |
| R-HSA-422475 | Axon guidance | -2.1 | 1.6 | -0.98 |
| GO:0071825 | protein-lipid complex subunit organization | -2.1 | 3.4 | -0.98 |
| GO:0001921 | positive regulation of receptor recycling | -2.1 | 6.9 | -0.98 |
| R-HSA-8983432 | Interleukin-15 signaling | -2.1 | 6.9 | -0.98 |
| GO:0030213 | hyaluronan biosynthetic process | -2.1 | 6.9 | -0.98 |
| GO:0031272 | regulation of pseudopodium assembly | -2.1 | 6.9 | -0.98 |
| GO:0044794 | positive regulation by host of viral process | -2.1 | 6.9 | -0.98 |
| GO:0072531 | pyrimidine-containing compound transmembrane transport | -2.1 | 6.9 | -0.98 |
| GO:0010872 | regulation of cholesterol esterification | -2.1 | 6.9 | -0.98 |
| GO:0070669 | response to interleukin-2 | -2.1 | 6.9 | -0.98 |
| GO:0051917 | regulation of fibrinolysis | -2.1 | 6.9 | -0.98 |
| WP1772 | Apoptosis Modulation and Signaling | -2.1 | 2.8 | -0.97 |
| WP117 | GPCRs, Other | -2.1 | 2.8 | -0.97 |
| GO:0010638 | positive regulation of organelle organization | -2.1 | 1.6 | -0.97 |
| GO:0007520 | myoblast fusion | -2.1 | 3.9 | -0.97 |
| hsa00052 | Galactose metabolism | -2.1 | 3.9 | -0.97 |
| GO:0050850 | positive regulation of calcium-mediated signaling | -2.1 | 3.9 | -0.97 |
| GO:0050691 | regulation of defense response to virus by host | -2.1 | 3.9 | -0.97 |
| GO:0032689 | negative regulation of interferon-gamma production | -2.1 | 3.9 | -0.97 |
| GO:0009206 | purine ribonucleoside triphosphate biosynthetic process | -2.1 | 2.2 | -0.97 |
| hsa04360 | Axon guidance | -2.1 | 2.1 | -0.97 |
| GO:0045995 | regulation of embryonic development | -2 | 2.4 | -0.96 |
| GO:0014902 | myotube differentiation | -2 | 2.6 | -0.96 |
| GO:0048259 | regulation of receptor-mediated endocytosis | -2 | 2.6 | -0.96 |
| GO:0048667 | cell morphogenesis involved in neuron differentiation | -2 | 1.6 | -0.96 |
| GO:0030031 | cell projection assembly | -2 | 1.6 | -0.96 |
| GO:0034765 | regulation of ion transmembrane transport | -2 | 1.7 | -0.96 |
| GO:0009145 | purine nucleoside triphosphate biosynthetic process | -2 | 2.2 | -0.96 |
| GO:0018105 | peptidyl-serine phosphorylation | -2 | 1.9 | -0.96 |
| WP2857 | Mesodermal Commitment Pathway | -2 | 2.3 | -0.95 |
| GO:0001837 | epithelial to mesenchymal transition | -2 | 2.3 | -0.95 |
| GO:0042982 | amyloid precursor protein metabolic process | -2 | 2.7 | -0.95 |
| GO:0061097 | regulation of protein tyrosine kinase activity | -2 | 2.7 | -0.95 |
| GO:1903035 | negative regulation of response to wounding | -2 | 2.7 | -0.95 |
| hsa04974 | Protein digestion and absorption | -2 | 2.7 | -0.95 |
| GO:0006732 | coenzyme metabolic process | -2 | 1.7 | -0.95 |
| hsa04930 | Type II diabetes mellitus | -2 | 3.3 | -0.95 |
| GO:0002763 | positive regulation of myeloid leukocyte differentiation | -2 | 3.3 | -0.95 |
| R-HSA-186797 | Signaling by PDGF | -2 | 3.3 | -0.95 |
| GO:0048799 | animal organ maturation | -2 | 4.7 | -0.95 |
| GO:0007263 | nitric oxide mediated signal transduction | -2 | 4.7 | -0.95 |
| GO:0034114 | regulation of heterotypic cell-cell adhesion | -2 | 4.7 | -0.95 |
| GO:0045606 | positive regulation of epidermal cell differentiation | -2 | 4.7 | -0.95 |
| M1718 | SIG IL4RECEPTOR IN B LYPHOCYTES | -2 | 4.7 | -0.95 |
| R-HSA-1368108 | BMAL1:CLOCK,NPAS2 activates circadian gene expression | -2 | 4.7 | -0.95 |
| R-HSA-9660821 | ADORA2B mediated anti-inflammatory cytokines production | -2 | 2.4 | -0.94 |
| GO:0010634 | positive regulation of epithelial cell migration | -2 | 2.2 | -0.94 |
| GO:0032392 | DNA geometric change | -2 | 2.5 | -0.94 |
| GO:0050678 | regulation of epithelial cell proliferation | -2 | 1.8 | -0.94 |
| GO:0007492 | endoderm development | -2 | 3 | -0.94 |
| GO:0015711 | organic anion transport | -2 | 1.6 | -0.94 |
| R-HSA-419037 | NCAM1 interactions | -2 | 3.8 | -0.94 |
| WP2036 | TNF related weak inducer of apoptosis (TWEAK) Signaling Pathway | -2 | 3.8 | -0.94 |
| GO:0090317 | negative regulation of intracellular protein transport | -2 | 3.8 | -0.94 |
| GO:0031641 | regulation of myelination | -2 | 3.8 | -0.94 |
| GO:0045684 | positive regulation of epidermis development | -2 | 3.8 | -0.94 |
| GO:0032787 | monocarboxylic acid metabolic process | -2 | 1.6 | -0.93 |
| GO:0060337 | type I interferon signaling pathway | -2 | 2.7 | -0.93 |
| GO:0051196 | regulation of coenzyme metabolic process | -2 | 2.7 | -0.93 |
| GO:0061564 | axon development | -2 | 1.6 | -0.93 |

**Supplementary Table 7: 293 Genes related to both Hypoxic-immune infiltration patterns and OS.**

| **id** | **HR** | **HR.95L** | **HR.95H** | **pvalue** |
| --- | --- | --- | --- | --- |
| A2M | 1.537378787 | 1.253839605 | 1.885036591 | 3.55E-05 |
| ABCA6 | 1.285309018 | 1.076437256 | 1.534710232 | 0.005537027 |
| ABI3BP | 1.177373315 | 1.030542106 | 1.345124973 | 0.016277002 |
| ADAMDEC1 | 0.860350499 | 0.7546538 | 0.980851061 | 0.024508533 |
| ADAMTSL1 | 1.560103043 | 1.002307498 | 2.428318168 | 0.048818429 |
| ADRB2 | 1.347273049 | 1.103719216 | 1.644571049 | 0.003389734 |
| AIM2 | 0.818266209 | 0.700465388 | 0.955878191 | 0.01144081 |
| AKR1B1 | 1.318392119 | 1.045363944 | 1.662729797 | 0.019559702 |
| ANKRD35 | 1.484576713 | 1.242698255 | 1.77353433 | 1.33E-05 |
| AP1S2 | 1.62128106 | 1.345962089 | 1.952917024 | 3.60E-07 |
| APOL3 | 0.765081442 | 0.592945466 | 0.987189626 | 0.039483793 |
| ATAD2 | 0.740511159 | 0.597026053 | 0.918480481 | 0.006261156 |
| ATP8B2 | 1.888521612 | 1.410972283 | 2.527699461 | 1.91E-05 |
| AXL | 1.521495719 | 1.185916998 | 1.952033091 | 0.000962724 |
| BCL6 | 1.567658616 | 1.203312533 | 2.042323561 | 0.000864163 |
| BCORL1 | 0.533372539 | 0.341323608 | 0.833479605 | 0.005785198 |
| BEX4 | 1.509143461 | 1.285737992 | 1.771367105 | 4.79E-07 |
| BIRC3 | 0.787190415 | 0.653470007 | 0.948274204 | 0.011765444 |
| BIRC5 | 0.716146448 | 0.594749047 | 0.862322921 | 0.000426741 |
| BTN2A2 | 0.589202031 | 0.348197672 | 0.997017099 | 0.048712964 |
| BTN3A1 | 0.57665326 | 0.42309949 | 0.785935672 | 0.000492648 |
| BTN3A2 | 0.647505217 | 0.504638827 | 0.830817969 | 0.000632658 |
| BTN3A3 | 0.693489473 | 0.550238027 | 0.874035645 | 0.001932647 |
| C16orf59 | 0.732524447 | 0.587497953 | 0.913351379 | 0.00568988 |
| C16orf70 | 0.577928344 | 0.338930415 | 0.985456471 | 0.044033637 |
| C1orf112 | 0.759983686 | 0.597185318 | 0.96716243 | 0.025653011 |
| C5orf15 | 0.612214673 | 0.403914571 | 0.92793584 | 0.020753 |
| C6orf136 | 0.621091808 | 0.454046431 | 0.849593805 | 0.002885135 |
| CAMK4 | 1.648585047 | 1.02921051 | 2.640696563 | 0.037549038 |
| CARD8 | 1.485648103 | 1.045262477 | 2.111575162 | 0.027331937 |
| CASKIN1 | 0.390531114 | 0.232886233 | 0.654888653 | 0.000364131 |
| CCDC50 | 2.485602796 | 1.80618994 | 3.420582256 | 2.28E-08 |
| CCDC69 | 1.361232822 | 1.153306295 | 1.60664587 | 0.000265845 |
| CCL19 | 1.146510443 | 1.035267579 | 1.269706714 | 0.008650788 |
| CCNB2 | 0.769032568 | 0.628172342 | 0.941479037 | 0.010954356 |
| CCNF | 0.631412562 | 0.499980852 | 0.797394185 | 0.000112794 |
| CCRN4L | 0.504190071 | 0.355685633 | 0.714697487 | 0.000119649 |
| CD244 | 0.568287376 | 0.384506414 | 0.839909374 | 0.004579253 |
| CD248 | 1.335988155 | 1.115057785 | 1.600692247 | 0.001684919 |
| CD36 | 1.340938391 | 1.111133932 | 1.618270954 | 0.002223264 |
| CD38 | 0.799572832 | 0.676768532 | 0.944660817 | 0.008560793 |
| CENPF | 0.736307848 | 0.601879701 | 0.900760146 | 0.002919182 |
| CENPO | 0.538344883 | 0.360661405 | 0.803565918 | 0.002445073 |
| CFD | 1.160624138 | 1.02183952 | 1.318258261 | 0.021879369 |
| CH25H | 1.280757485 | 1.097894462 | 1.494077793 | 0.00164306 |
| CHST12 | 1.509443839 | 1.082626229 | 2.104531225 | 0.015176216 |
| CILP | 1.225941131 | 1.08306711 | 1.38766254 | 0.001272351 |
| CLEC4E | 0.636393135 | 0.424443211 | 0.954182353 | 0.028748838 |
| CLIP4 | 1.721704658 | 1.374937616 | 2.15592831 | 2.19E-06 |
| CLN6 | 0.37154858 | 0.241257878 | 0.572202443 | 6.99E-06 |
| CLPB | 0.662542571 | 0.446457872 | 0.983211825 | 0.040950746 |
| CMTM2 | 0.763941943 | 0.608188431 | 0.95958302 | 0.02063444 |
| COL1A2 | 1.25380042 | 1.061095662 | 1.481502138 | 0.007896515 |
| COL4A1 | 1.622657562 | 1.283972069 | 2.050681341 | 5.06E-05 |
| COL5A1 | 1.232295224 | 1.044761843 | 1.453490602 | 0.013144424 |
| COL5A2 | 1.246609068 | 1.039870358 | 1.494449915 | 0.017193487 |
| CPE | 1.348188851 | 1.199439966 | 1.51538487 | 5.48E-07 |
| CPSF3 | 0.527623019 | 0.331202224 | 0.840531949 | 0.007120312 |
| CPVL | 1.197728061 | 1.019545097 | 1.407051549 | 0.028127591 |
| CRHR1 | 0.315221117 | 0.175971909 | 0.564660311 | 0.000103799 |
| CSF1R | 1.237719732 | 1.002606254 | 1.527967863 | 0.047235787 |
| CTHRC1 | 1.249119627 | 1.08029423 | 1.444328591 | 0.00267816 |
| CX3CR1 | 1.494743712 | 1.212665902 | 1.842435546 | 0.000165188 |
| CXCL9 | 0.875767609 | 0.781634353 | 0.981237457 | 0.022229316 |
| CXCR3 | 0.59311062 | 0.426737726 | 0.82434757 | 0.00187111 |
| CYFIP2 | 1.497577634 | 1.221644129 | 1.835836409 | 0.000101621 |
| CYP1B1 | 1.254868077 | 1.109625084 | 1.419122472 | 0.000297564 |
| CYYR1 | 1.370645987 | 1.112300466 | 1.688995446 | 0.003088827 |
| DDX26B | 1.664789609 | 1.161141111 | 2.386897179 | 0.005559343 |
| DDX60 | 0.8065211 | 0.678977333 | 0.958023564 | 0.014356529 |
| DOCK11 | 1.3254889 | 1.05349576 | 1.667705643 | 0.016185739 |
| DSCC1 | 0.673548964 | 0.499077233 | 0.90901403 | 0.009777105 |
| EAF2 | 0.702549104 | 0.516956246 | 0.954771797 | 0.024090702 |
| EBP | 0.756159886 | 0.575925478 | 0.992798192 | 0.044220605 |
| ECE2 | 0.615178542 | 0.4178398 | 0.905717067 | 0.013826713 |
| EFEMP1 | 1.382062019 | 1.197088874 | 1.595617057 | 1.02E-05 |
| EGR2 | 1.322496346 | 1.091258664 | 1.602733286 | 0.004363943 |
| EID3 | 1.828137659 | 1.343733632 | 2.487165031 | 0.000122524 |
| EME1 | 0.600153724 | 0.421971973 | 0.853574443 | 0.004498664 |
| ERBB2IP | 1.712190438 | 1.013344583 | 2.892990346 | 0.044484249 |
| ESM1 | 1.256584605 | 1.042651715 | 1.514412577 | 0.016458012 |
| EVL | 1.395195774 | 1.1154861 | 1.745043035 | 0.003530438 |
| EXO1 | 0.722063379 | 0.588650882 | 0.885712636 | 0.0017818 |
| EXOSC4 | 0.679202366 | 0.479567666 | 0.961941112 | 0.029370409 |
| F13A1 | 1.296159527 | 1.127594825 | 1.48992305 | 0.000262884 |
| FABP4 | 1.216115292 | 1.085235517 | 1.362779213 | 0.000757305 |
| FAM64A | 0.725283543 | 0.580762574 | 0.905768109 | 0.004612972 |
| FAM83H | 0.677004864 | 0.565637067 | 0.810299771 | 2.10E-05 |
| FANCD2 | 0.527358742 | 0.379124342 | 0.733551534 | 0.000144578 |
| FASLG | 0.649091096 | 0.438592866 | 0.960615833 | 0.030705919 |
| FBLN5 | 1.44109923 | 1.226208974 | 1.693648501 | 9.20E-06 |
| FBXL19 | 0.682996238 | 0.479537553 | 0.972778581 | 0.034608316 |
| FBXL5 | 1.660171753 | 1.156538991 | 2.383119178 | 0.005987161 |
| FBXL6 | 0.594945246 | 0.440750297 | 0.803084759 | 0.000692052 |
| FKBPL | 0.586337344 | 0.388475366 | 0.884976271 | 0.011030251 |
| FLT1 | 2.043366167 | 1.316648969 | 3.171190949 | 0.001439002 |
| FMO2 | 1.300659112 | 1.110145268 | 1.52386735 | 0.001141758 |
| FNBP1 | 1.404470494 | 1.154033808 | 1.709254403 | 0.00069975 |
| FNDC1 | 1.118077465 | 1.005560855 | 1.243184052 | 0.039166095 |
| FOXF1 | 1.397159372 | 1.177212564 | 1.658200371 | 0.00012984 |
| FPR2 | 0.701269554 | 0.498371762 | 0.986771371 | 0.041711898 |
| FUT11 | 1.454305755 | 1.061209304 | 1.993014216 | 0.019833987 |
| FYN | 1.368949164 | 1.008136878 | 1.858896203 | 0.044232486 |
| GALK1 | 0.635310255 | 0.456567808 | 0.884028862 | 0.007118706 |
| GAN | 0.57001802 | 0.341578885 | 0.951231347 | 0.031450509 |
| GAS7 | 1.584018936 | 1.159552235 | 2.163866288 | 0.003851091 |
| GFPT2 | 1.23402198 | 1.036030441 | 1.469850873 | 0.018439883 |
| GMCL1 | 0.65539086 | 0.47115549 | 0.911667568 | 0.012102015 |
| GPR155 | 1.533080781 | 1.249607887 | 1.880859351 | 4.20E-05 |
| GPR156 | 0.555424298 | 0.359593668 | 0.857902068 | 0.008027497 |
| GPR97 | 0.603969781 | 0.386840895 | 0.942970357 | 0.026534617 |
| GPX3 | 1.365909523 | 1.154393454 | 1.61618105 | 0.000280654 |
| GRTP1 | 0.719085554 | 0.585028493 | 0.883861281 | 0.001731806 |
| GYPC | 1.48703264 | 1.229169613 | 1.798991815 | 4.44E-05 |
| HCFC2 | 1.775151639 | 1.239385774 | 2.542520181 | 0.001743419 |
| HK2 | 0.716090906 | 0.604938324 | 0.847666887 | 0.00010434 |
| HK3 | 0.741874894 | 0.583313498 | 0.943537841 | 0.01494569 |
| HLA-DRB6 | 0.756390306 | 0.644615496 | 0.887546604 | 0.000621227 |
| HNF4A | 0.617563534 | 0.461568256 | 0.826280215 | 0.001176461 |
| HOXB13 | 0.757669161 | 0.614920494 | 0.933555742 | 0.00917423 |
| HPSE | 0.725617276 | 0.571572046 | 0.921179465 | 0.008431557 |
| HSPE1 | 0.683504437 | 0.508736042 | 0.91831181 | 0.011551173 |
| IFNG | 0.753854711 | 0.626912762 | 0.906500807 | 0.002670045 |
| IGF1 | 1.261217779 | 1.087009867 | 1.463344846 | 0.00221317 |
| IL12RB1 | 0.542489135 | 0.351253884 | 0.837839737 | 0.005819714 |
| IL1RN | 0.710119084 | 0.581347313 | 0.867414543 | 0.000798581 |
| IL21R | 0.646142771 | 0.447860325 | 0.932211355 | 0.019526935 |
| IL2RG | 0.707960169 | 0.557990539 | 0.898236736 | 0.004460663 |
| IL6ST | 1.639041924 | 1.073165276 | 2.503303535 | 0.022209834 |
| IQGAP3 | 0.501189507 | 0.337463839 | 0.74434915 | 0.000619335 |
| IRAK2 | 0.71366298 | 0.563479248 | 0.903875077 | 0.005137256 |
| IRGQ | 0.471787384 | 0.228727379 | 0.97313814 | 0.041984135 |
| ISCU | 1.799899044 | 1.241888843 | 2.608636504 | 0.001908444 |
| ITPR1 | 1.492675812 | 1.200753737 | 1.855568726 | 0.000308964 |
| JAM2 | 1.368758425 | 1.164979633 | 1.608182302 | 0.000135293 |
| JAZF1 | 1.812741467 | 1.400694085 | 2.346002358 | 6.15E-06 |
| KCNMB3 | 1.320872402 | 1.021605598 | 1.707805737 | 0.033751076 |
| KCTD3 | 0.68533961 | 0.501992191 | 0.935652764 | 0.017374745 |
| KIAA0922 | 1.471132306 | 1.069622088 | 2.023359733 | 0.017603773 |
| KIFC1 | 0.787776416 | 0.671977971 | 0.923529802 | 0.00327515 |
| KIT | 1.266088149 | 1.082307675 | 1.481075334 | 0.003194134 |
| KLF12 | 1.646809666 | 1.143206823 | 2.372258475 | 0.007392319 |
| KLRC3 | 0.666152131 | 0.489017667 | 0.907449141 | 0.01000268 |
| LAD1 | 0.707454387 | 0.570576903 | 0.877167839 | 0.001607439 |
| LAG3 | 0.740415246 | 0.609124142 | 0.90000494 | 0.002545565 |
| LDB2 | 1.355611259 | 1.101752376 | 1.667962715 | 0.004028489 |
| LGALS9 | 0.713079615 | 0.570038562 | 0.892014279 | 0.003073087 |
| LILRA6 | 0.622662688 | 0.464494868 | 0.834689143 | 0.001532446 |
| LLGL2 | 0.690558513 | 0.521391264 | 0.914612678 | 0.009808411 |
| LMO2 | 1.761569379 | 1.362962382 | 2.27675152 | 1.52E-05 |
| LOC374443 | 1.539915998 | 1.018919608 | 2.327309497 | 0.040470453 |
| LTC4S | 1.5225179 | 1.212689448 | 1.911504022 | 0.000293299 |
| LY86 | 1.306449215 | 1.057123493 | 1.614579152 | 0.013356376 |
| LYL1 | 1.450348685 | 1.129280118 | 1.862701091 | 0.003587955 |
| MAF | 1.33492876 | 1.028446908 | 1.732743596 | 0.029950744 |
| MAGEH1 | 1.984060983 | 1.509511823 | 2.607795396 | 9.00E-07 |
| MAN1C1 | 1.468101117 | 1.188481983 | 1.813507416 | 0.000368429 |
| MAPK8 | 0.440400007 | 0.22869864 | 0.848068734 | 0.01417222 |
| MAT2B | 0.555946349 | 0.365040875 | 0.846689685 | 0.006231244 |
| MEF2C | 1.577030755 | 1.263632137 | 1.968156656 | 5.58E-05 |
| MFAP4 | 1.242585245 | 1.122318901 | 1.375739185 | 2.89E-05 |
| MITF | 1.60555877 | 1.087812034 | 2.369728302 | 0.017138961 |
| MLLT4 | 0.497839497 | 0.250126687 | 0.990874536 | 0.04702577 |
| MRPL12 | 0.586668093 | 0.422777676 | 0.814090883 | 0.001420381 |
| MSI2 | 0.642239863 | 0.450316938 | 0.915959421 | 0.014501151 |
| MTFR1 | 0.624156033 | 0.453902462 | 0.858269753 | 0.003726538 |
| MXD1 | 0.63646717 | 0.501996702 | 0.806958405 | 0.000190585 |
| NFATC2 | 1.70862886 | 1.071332225 | 2.725030119 | 0.024494964 |
| NFIL3 | 1.323998883 | 1.00080994 | 1.751554389 | 0.049340874 |
| NGRN | 1.567252294 | 1.081592872 | 2.270983672 | 0.017574975 |
| NID2 | 1.398739568 | 1.127293315 | 1.735548639 | 0.002300297 |
| NLRC5 | 0.646995367 | 0.483174942 | 0.866359094 | 0.00346677 |
| NOL6 | 0.502750955 | 0.332815382 | 0.759455651 | 0.001085735 |
| NOX4 | 1.263818714 | 1.050832745 | 1.519973325 | 0.012899485 |
| NPC1L1 | 0.78876785 | 0.651578635 | 0.954842114 | 0.014934596 |
| NR3C1 | 1.936748719 | 1.384627522 | 2.70902863 | 0.000113083 |
| NR6A1 | 0.526215669 | 0.283687142 | 0.976085585 | 0.041675176 |
| NSUN4 | 0.539110462 | 0.313490836 | 0.927108725 | 0.025510995 |
| NUP188 | 0.563266476 | 0.382205438 | 0.830101018 | 0.003718757 |
| ODF2 | 0.601837601 | 0.383542065 | 0.944377503 | 0.027179723 |
| OLFML3 | 1.400214404 | 1.183623369 | 1.656439395 | 8.63E-05 |
| P2RY12 | 1.304697144 | 1.061186271 | 1.604086563 | 0.01162252 |
| PAPPA | 1.325341162 | 1.069461377 | 1.642442853 | 0.010066329 |
| PAX8 | 0.466089681 | 0.27071594 | 0.802463241 | 0.005889771 |
| PDE1A | 1.531334063 | 1.278790936 | 1.833750886 | 3.58E-06 |
| PEX13 | 0.46187816 | 0.312094505 | 0.68354755 | 0.000112348 |
| PHACTR1 | 1.392180556 | 1.021892001 | 1.896645338 | 0.035973266 |
| PJA2 | 1.602855244 | 1.200671013 | 2.139757607 | 0.001371217 |
| PLAUR | 0.792725448 | 0.634912963 | 0.989763437 | 0.040285509 |
| PLCL1 | 1.917629348 | 1.4539636 | 2.529157069 | 4.02E-06 |
| PLEKHO1 | 1.364457657 | 1.128029584 | 1.650439602 | 0.001370229 |
| PNO1 | 0.649229808 | 0.438710118 | 0.960769596 | 0.030765689 |
| POLR1A | 0.572210251 | 0.355457692 | 0.921135143 | 0.02155353 |
| POLR1B | 0.559478549 | 0.357404009 | 0.875805082 | 0.011086817 |
| PPAP2A | 1.575447805 | 1.228066816 | 2.021091813 | 0.000348327 |
| PPM1G | 0.600715629 | 0.408761393 | 0.882811521 | 0.009472373 |
| PPM1K | 1.331569405 | 1.030213247 | 1.721077734 | 0.028718576 |
| PPM1M | 1.468086134 | 1.115415198 | 1.932264238 | 0.006158981 |
| PPME1 | 0.624217688 | 0.40340336 | 0.965901033 | 0.034368316 |
| PPP1R16A | 0.734732402 | 0.576721905 | 0.936034679 | 0.012595406 |
| PRKAR2B | 1.400144839 | 1.150140713 | 1.704491935 | 0.000796915 |
| PRKRA | 1.626346571 | 1.088633171 | 2.429655129 | 0.017567321 |
| PSMB10 | 0.572257074 | 0.445087684 | 0.735760997 | 1.34E-05 |
| PSMD3 | 0.734014847 | 0.561175516 | 0.96008785 | 0.023990057 |
| PTGER4 | 0.811207757 | 0.664780825 | 0.989887193 | 0.039394799 |
| PTPLAD2 | 1.331408507 | 1.087593428 | 1.629881689 | 0.005544073 |
| PTPN22 | 0.652480681 | 0.462535195 | 0.920429501 | 0.015003424 |
| PTPN7 | 0.608830822 | 0.40043432 | 0.925682317 | 0.020275785 |
| PUSL1 | 0.632151334 | 0.448737615 | 0.890532229 | 0.008714865 |
| PXDN | 1.483388004 | 1.207421457 | 1.822429076 | 0.000173561 |
| RABEPK | 0.582280221 | 0.388406552 | 0.8729262 | 0.008849214 |
| RAD54B | 0.681681338 | 0.523435806 | 0.887767785 | 0.004465289 |
| RANGAP1 | 0.52759043 | 0.368934245 | 0.754474993 | 0.000458892 |
| RASGRP2 | 1.84929263 | 1.435173019 | 2.382906579 | 2.00E-06 |
| RASSF2 | 1.306847705 | 1.040073184 | 1.642048801 | 0.021605097 |
| RCCD1 | 0.529704986 | 0.322623882 | 0.869704283 | 0.012011959 |
| RECQL4 | 0.719751305 | 0.572963762 | 0.904144339 | 0.004715267 |
| RELL2 | 0.568903141 | 0.38981299 | 0.830271931 | 0.003452416 |
| RFC3 | 0.743176177 | 0.575442418 | 0.959802082 | 0.022945959 |
| RFTN1 | 1.305486997 | 1.023634388 | 1.664946311 | 0.031697389 |
| RGL1 | 1.513001113 | 1.219419485 | 1.877264055 | 0.000168335 |
| RGS19 | 1.401040971 | 1.032574408 | 1.900992109 | 0.030323002 |
| RMND5A | 0.604867379 | 0.387226334 | 0.944833845 | 0.027151184 |
| RNF126 | 0.427644613 | 0.2676696 | 0.683230053 | 0.000380256 |
| RNF19B | 0.623001106 | 0.485164132 | 0.799998089 | 0.000208105 |
| RNF40 | 0.499523241 | 0.287119065 | 0.869059213 | 0.014022106 |
| RORA | 2.357952335 | 1.51949011 | 3.6590822 | 0.000130208 |
| RRP12 | 0.63172291 | 0.44083615 | 0.905265675 | 0.01234391 |
| RRP9 | 0.672904655 | 0.507989649 | 0.891358073 | 0.00574941 |
| S100B | 1.243832728 | 1.02786071 | 1.50518435 | 0.024937714 |
| SAMD9L | 0.80413714 | 0.666515574 | 0.970174689 | 0.022838342 |
| SCRIB | 0.677678501 | 0.475092832 | 0.966649295 | 0.031781445 |
| SDPR | 1.401110622 | 1.219091519 | 1.610306482 | 2.03E-06 |
| SEMA4B | 0.76156541 | 0.597141385 | 0.971263905 | 0.028169254 |
| SERPING1 | 1.234114675 | 1.029368342 | 1.479586042 | 0.023044636 |
| SERPINI1 | 1.446147231 | 1.155812873 | 1.809412113 | 0.001253516 |
| SFMBT1 | 0.482441097 | 0.328198727 | 0.709172195 | 0.000208598 |
| SH2D1B | 0.593926428 | 0.406811711 | 0.867105328 | 0.006964444 |
| SH3BGRL | 1.408712599 | 1.113597718 | 1.782035967 | 0.004276158 |
| SHE | 1.421818965 | 1.08442532 | 1.864184773 | 0.010884309 |
| SIRPG | 0.659236692 | 0.472823862 | 0.919143578 | 0.014003749 |
| SLAMF7 | 0.8105695 | 0.659599985 | 0.996092978 | 0.045804438 |
| SLC1A5 | 0.700655056 | 0.540211106 | 0.90875123 | 0.007337935 |
| SLC25A15 | 0.607870639 | 0.467220102 | 0.790862192 | 0.000209363 |
| SLC25A39 | 0.576905676 | 0.397066891 | 0.838196702 | 0.003901871 |
| SLC29A2 | 0.655822762 | 0.497361963 | 0.86476958 | 0.002793482 |
| SNAI1 | 1.433756094 | 1.084348741 | 1.895752223 | 0.011465083 |
| SNX20 | 0.551266751 | 0.347402992 | 0.874762271 | 0.011473691 |
| SOAT1 | 1.395480368 | 1.015258438 | 1.918098275 | 0.040046429 |
| SPAG5 | 0.720977927 | 0.578407078 | 0.898690889 | 0.003612515 |
| SPOCK1 | 1.187472878 | 1.045112484 | 1.349224947 | 0.008359841 |
| SURF6 | 0.66837869 | 0.472665681 | 0.945129065 | 0.022654566 |
| SYNE1 | 1.760267799 | 1.363551042 | 2.272406846 | 1.43E-05 |
| TAPBPL | 0.742935968 | 0.583349755 | 0.946179968 | 0.016024799 |
| TBC1D21 | 0.627356691 | 0.44126654 | 0.891924452 | 0.009402855 |
| TBC1D9 | 1.54305926 | 1.20040827 | 1.983518391 | 0.000709963 |
| TCF21 | 1.313182813 | 1.094632568 | 1.575367983 | 0.003351648 |
| TCF4 | 1.477492714 | 1.194794177 | 1.827080146 | 0.000315212 |
| TGFBI | 1.432169119 | 1.173596792 | 1.74771131 | 0.000406836 |
| THBS1 | 1.263239558 | 1.074144212 | 1.485623776 | 0.004735815 |
| THBS2 | 1.184285561 | 1.040714172 | 1.347663295 | 0.010311527 |
| TIAM1 | 1.560981043 | 1.131037448 | 2.154359982 | 0.006747564 |
| TIFAB | 0.639337224 | 0.458538965 | 0.891422795 | 0.008346979 |
| TIMP1 | 1.579069273 | 1.224009793 | 2.037124034 | 0.000439112 |
| TINF2 | 1.487079942 | 1.052464061 | 2.101170801 | 0.024456046 |
| TMEM141 | 0.760856703 | 0.587657825 | 0.98510204 | 0.038092389 |
| TMEM198 | 1.460270797 | 1.078703055 | 1.976809827 | 0.014276157 |
| TNFRSF14 | 0.679134705 | 0.495111269 | 0.931556149 | 0.016410459 |
| TOR1AIP2 | 0.496021331 | 0.291779504 | 0.843229758 | 0.009603122 |
| TRAIP | 0.693394023 | 0.564594264 | 0.851576615 | 0.000478724 |
| TRIM21 | 0.609201034 | 0.446383862 | 0.831405281 | 0.001785969 |
| TRIM61 | 1.56976854 | 1.015088622 | 2.42754496 | 0.04263245 |
| TRIM69 | 0.448895444 | 0.263770704 | 0.76394807 | 0.003152315 |
| TSC22D3 | 1.421827661 | 1.116720334 | 1.810295592 | 0.004293644 |
| TTYH2 | 1.843455092 | 1.320391363 | 2.57372683 | 0.000327784 |
| TXLNB | 1.397126946 | 1.02868855 | 1.897526421 | 0.032269841 |
| TXNDC15 | 1.959096094 | 1.310921005 | 2.927756509 | 0.001035398 |
| TXNIP | 1.288063959 | 1.048433516 | 1.582464444 | 0.015938949 |
| UBE2J1 | 0.594301762 | 0.405721718 | 0.870534086 | 0.007543149 |
| UBR4 | 0.662656184 | 0.442412781 | 0.992541891 | 0.045903382 |
| UNC45A | 1.654497766 | 1.037789669 | 2.637685594 | 0.034358427 |
| UTRN | 1.43750085 | 1.009531725 | 2.046898222 | 0.044159477 |
| VARS | 0.680102003 | 0.49235256 | 0.939446187 | 0.019338332 |
| VAV2 | 0.661593708 | 0.454892063 | 0.962219986 | 0.030659042 |
| WDR34 | 0.641638637 | 0.488665979 | 0.842498063 | 0.001406352 |
| WRNIP1 | 0.568416454 | 0.370142288 | 0.872900168 | 0.009849992 |
| YME1L1 | 0.688177717 | 0.475957009 | 0.995023838 | 0.04697991 |
| ZBED2 | 0.735962123 | 0.600625047 | 0.901794306 | 0.003106794 |
| ZBP1 | 0.73834573 | 0.586254298 | 0.929894106 | 0.009949394 |
| ZNF326 | 0.295387207 | 0.161142477 | 0.541468666 | 8.01E-05 |
| ZNF382 | 1.886849767 | 1.423580208 | 2.500879137 | 1.00E-05 |
| ZNF683 | 0.73749962 | 0.582151794 | 0.934302179 | 0.011634063 |
| ZNF7 | 0.619175422 | 0.386911517 | 0.990867902 | 0.045694401 |

**Supplementary Table 8: Three different genomic phenotypes of ACRG chort.**

| **ACRG** | **HI genecluster** |
| --- | --- |
| GSE62254_GSM1523727 | A |
| GSE62254_GSM1523728 | B |
| GSE62254_GSM1523729 | B |
| GSE62254_GSM1523744 | A |
| GSE62254_GSM1523745 | A |
| GSE62254_GSM1523746 | A |
| GSE62254_GSM1523747 | A |
| GSE62254_GSM1523748 | B |
| GSE62254_GSM1523765 | A |
| GSE62254_GSM1523768 | B |
| GSE62254_GSM1523769 | B |
| GSE62254_GSM1523770 | A |
| GSE62254_GSM1523771 | C |
| GSE62254_GSM1523772 | C |
| GSE62254_GSM1523773 | C |
| GSE62254_GSM1523774 | C |
| GSE62254_GSM1523775 | A |
| GSE62254_GSM1523776 | B |
| GSE62254_GSM1523777 | A |
| GSE62254_GSM1523778 | B |
| GSE62254_GSM1523779 | B |
| GSE62254_GSM1523780 | B |
| GSE62254_GSM1523781 | A |
| GSE62254_GSM1523782 | A |
| GSE62254_GSM1523783 | B |
| GSE62254_GSM1523784 | B |
| GSE62254_GSM1523785 | B |
| GSE62254_GSM1523786 | B |
| GSE62254_GSM1523787 | A |
| GSE62254_GSM1523788 | C |
| GSE62254_GSM1523789 | B |
| GSE62254_GSM1523790 | B |
| GSE62254_GSM1523791 | B |
| GSE62254_GSM1523792 | A |
| GSE62254_GSM1523793 | B |
| GSE62254_GSM1523794 | B |
| GSE62254_GSM1523795 | A |
| GSE62254_GSM1523796 | C |
| GSE62254_GSM1523797 | A |
| GSE62254_GSM1523798 | C |
| GSE62254_GSM1523799 | A |
| GSE62254_GSM1523800 | A |
| GSE62254_GSM1523801 | A |
| GSE62254_GSM1523802 | A |
| GSE62254_GSM1523803 | A |
| GSE62254_GSM1523804 | B |
| GSE62254_GSM1523805 | B |
| GSE62254_GSM1523806 | B |
| GSE62254_GSM1523807 | B |
| GSE62254_GSM1523808 | B |
| GSE62254_GSM1523809 | A |
| GSE62254_GSM1523810 | B |
| GSE62254_GSM1523811 | B |
| GSE62254_GSM1523812 | B |
| GSE62254_GSM1523813 | B |
| GSE62254_GSM1523814 | A |
| GSE62254_GSM1523815 | B |
| GSE62254_GSM1523816 | A |
| GSE62254_GSM1523817 | A |
| GSE62254_GSM1523818 | A |
| GSE62254_GSM1523819 | A |
| GSE62254_GSM1523820 | A |
| GSE62254_GSM1523821 | A |
| GSE62254_GSM1523822 | B |
| GSE62254_GSM1523823 | B |
| GSE62254_GSM1523824 | A |
| GSE62254_GSM1523825 | A |
| GSE62254_GSM1523826 | B |
| GSE62254_GSM1523827 | C |
| GSE62254_GSM1523828 | B |
| GSE62254_GSM1523829 | A |
| GSE62254_GSM1523830 | A |
| GSE62254_GSM1523831 | A |
| GSE62254_GSM1523832 | B |
| GSE62254_GSM1523833 | A |
| GSE62254_GSM1523834 | C |
| GSE62254_GSM1523835 | B |
| GSE62254_GSM1523836 | B |
| GSE62254_GSM1523837 | A |
| GSE62254_GSM1523838 | B |
| GSE62254_GSM1523839 | B |
| GSE62254_GSM1523840 | A |
| GSE62254_GSM1523841 | B |
| GSE62254_GSM1523842 | B |
| GSE62254_GSM1523843 | B |
| GSE62254_GSM1523844 | B |
| GSE62254_GSM1523845 | B |
| GSE62254_GSM1523846 | B |
| GSE62254_GSM1523847 | A |
| GSE62254_GSM1523848 | C |
| GSE62254_GSM1523849 | C |
| GSE62254_GSM1523850 | C |
| GSE62254_GSM1523851 | A |
| GSE62254_GSM1523852 | B |
| GSE62254_GSM1523853 | A |
| GSE62254_GSM1523854 | B |
| GSE62254_GSM1523855 | A |
| GSE62254_GSM1523856 | B |
| GSE62254_GSM1523857 | C |
| GSE62254_GSM1523858 | C |
| GSE62254_GSM1523859 | A |
| GSE62254_GSM1523860 | B |
| GSE62254_GSM1523861 | B |
| GSE62254_GSM1523862 | C |
| GSE62254_GSM1523863 | B |
| GSE62254_GSM1523864 | A |
| GSE62254_GSM1523865 | A |
| GSE62254_GSM1523866 | C |
| GSE62254_GSM1523867 | A |
| GSE62254_GSM1523868 | B |
| GSE62254_GSM1523869 | B |
| GSE62254_GSM1523870 | A |
| GSE62254_GSM1523871 | A |
| GSE62254_GSM1523872 | B |
| GSE62254_GSM1523873 | B |
| GSE62254_GSM1523874 | B |
| GSE62254_GSM1523875 | A |
| GSE62254_GSM1523876 | A |
| GSE62254_GSM1523877 | A |
| GSE62254_GSM1523878 | B |
| GSE62254_GSM1523879 | A |
| GSE62254_GSM1523880 | A |
| GSE62254_GSM1523881 | A |
| GSE62254_GSM1523882 | A |
| GSE62254_GSM1523883 | A |
| GSE62254_GSM1523884 | B |
| GSE62254_GSM1523885 | A |
| GSE62254_GSM1523886 | C |
| GSE62254_GSM1523887 | B |
| GSE62254_GSM1523888 | B |
| GSE62254_GSM1523889 | A |
| GSE62254_GSM1523890 | B |
| GSE62254_GSM1523891 | B |
| GSE62254_GSM1523892 | B |
| GSE62254_GSM1523893 | A |
| GSE62254_GSM1523894 | A |
| GSE62254_GSM1523895 | A |
| GSE62254_GSM1523896 | B |
| GSE62254_GSM1523897 | A |
| GSE62254_GSM1523898 | A |
| GSE62254_GSM1523899 | A |
| GSE62254_GSM1523901 | A |
| GSE62254_GSM1523903 | A |
| GSE62254_GSM1523904 | B |
| GSE62254_GSM1523905 | B |
| GSE62254_GSM1523906 | B |
| GSE62254_GSM1523908 | B |
| GSE62254_GSM1523909 | B |
| GSE62254_GSM1523910 | A |
| GSE62254_GSM1523911 | A |
| GSE62254_GSM1523918 | C |
| GSE62254_GSM1523919 | B |
| GSE62254_GSM1523920 | B |
| GSE62254_GSM1523921 | A |
| GSE62254_GSM1523922 | A |
| GSE62254_GSM1523923 | A |
| GSE62254_GSM1523924 | B |
| GSE62254_GSM1523925 | A |
| GSE62254_GSM1523926 | A |
| GSE62254_GSM1523927 | B |
| GSE62254_GSM1523928 | A |
| GSE62254_GSM1523929 | B |
| GSE62254_GSM1523930 | B |
| GSE62254_GSM1523931 | B |
| GSE62254_GSM1523932 | A |
| GSE62254_GSM1523933 | A |
| GSE62254_GSM1523934 | A |
| GSE62254_GSM1523935 | C |
| GSE62254_GSM1523936 | C |
| GSE62254_GSM1523937 | B |
| GSE62254_GSM1523938 | C |
| GSE62254_GSM1523939 | C |
| GSE62254_GSM1523940 | A |
| GSE62254_GSM1523941 | B |
| GSE62254_GSM1523942 | A |
| GSE62254_GSM1523943 | A |
| GSE62254_GSM1523944 | B |
| GSE62254_GSM1523945 | C |
| GSE62254_GSM1523946 | A |
| GSE62254_GSM1523947 | A |
| GSE62254_GSM1523948 | C |
| GSE62254_GSM1523949 | C |
| GSE62254_GSM1523950 | A |
| GSE62254_GSM1523951 | B |
| GSE62254_GSM1523952 | B |
| GSE62254_GSM1523953 | A |
| GSE62254_GSM1523954 | A |
| GSE62254_GSM1523955 | C |
| GSE62254_GSM1523956 | A |
| GSE62254_GSM1523957 | A |
| GSE62254_GSM1523958 | B |
| GSE62254_GSM1523959 | A |
| GSE62254_GSM1523960 | A |
| GSE62254_GSM1523961 | A |
| GSE62254_GSM1523962 | C |
| GSE62254_GSM1523963 | B |
| GSE62254_GSM1523964 | A |
| GSE62254_GSM1523965 | B |
| GSE62254_GSM1523966 | A |
| GSE62254_GSM1523967 | B |
| GSE62254_GSM1523968 | C |
| GSE62254_GSM1523969 | C |
| GSE62254_GSM1523970 | A |
| GSE62254_GSM1523971 | C |
| GSE62254_GSM1523972 | A |
| GSE62254_GSM1523973 | A |
| GSE62254_GSM1523974 | A |
| GSE62254_GSM1523975 | C |
| GSE62254_GSM1523976 | A |
| GSE62254_GSM1523977 | A |
| GSE62254_GSM1523978 | A |
| GSE62254_GSM1523979 | A |
| GSE62254_GSM1523980 | C |
| GSE62254_GSM1523981 | C |
| GSE62254_GSM1523982 | C |
| GSE62254_GSM1523983 | A |
| GSE62254_GSM1523984 | A |
| GSE62254_GSM1523985 | B |
| GSE62254_GSM1523986 | C |
| GSE62254_GSM1523987 | B |
| GSE62254_GSM1523988 | C |
| GSE62254_GSM1523989 | C |
| GSE62254_GSM1523990 | B |
| GSE62254_GSM1523991 | B |
| GSE62254_GSM1523992 | A |
| GSE62254_GSM1523993 | B |
| GSE62254_GSM1523994 | B |
| GSE62254_GSM1523995 | A |
| GSE62254_GSM1523996 | B |
| GSE62254_GSM1523997 | A |
| GSE62254_GSM1523998 | A |
| GSE62254_GSM1523999 | A |
| GSE62254_GSM1524000 | B |
| GSE62254_GSM1524001 | A |
| GSE62254_GSM1524002 | B |
| GSE62254_GSM1524003 | A |
| GSE62254_GSM1524004 | B |
| GSE62254_GSM1524005 | A |
| GSE62254_GSM1524006 | C |
| GSE62254_GSM1524007 | B |
| GSE62254_GSM1524008 | A |
| GSE62254_GSM1524009 | C |
| GSE62254_GSM1524010 | C |
| GSE62254_GSM1524011 | A |
| GSE62254_GSM1524012 | A |
| GSE62254_GSM1524013 | A |
| GSE62254_GSM1524014 | A |
| GSE62254_GSM1524015 | A |
| GSE62254_GSM1524016 | B |
| GSE62254_GSM1524017 | A |
| GSE62254_GSM1524018 | A |
| GSE62254_GSM1524019 | B |
| GSE62254_GSM1524020 | B |
| GSE62254_GSM1524021 | B |
| GSE62254_GSM1524022 | C |
| GSE62254_GSM1524023 | A |
| GSE62254_GSM1524024 | B |
| GSE62254_GSM1524025 | B |
| GSE62254_GSM1524026 | C |
| GSE62254_GSM1524027 | B |
| GSE62254_GSM1524028 | A |
| GSE62254_GSM1524029 | C |
| GSE62254_GSM1524030 | C |
| GSE62254_GSM1524031 | A |
| GSE62254_GSM1524032 | A |
| GSE62254_GSM1524033 | B |
| GSE62254_GSM1524034 | B |
| GSE62254_GSM1524035 | C |
| GSE62254_GSM1524036 | A |
| GSE62254_GSM1524037 | B |
| GSE62254_GSM1524038 | B |
| GSE62254_GSM1524039 | C |
| GSE62254_GSM1524040 | B |
| GSE62254_GSM1524041 | B |
| GSE62254_GSM1524042 | B |
| GSE62254_GSM1524043 | B |
| GSE62254_GSM1524044 | B |
| GSE62254_GSM1524045 | A |
| GSE62254_GSM1524046 | C |
| GSE62254_GSM1524047 | B |
| GSE62254_GSM1524048 | B |
| GSE62254_GSM1524049 | B |
| GSE62254_GSM1524050 | A |
| GSE62254_GSM1524051 | B |
| GSE62254_GSM1524052 | C |
| GSE62254_GSM1524053 | A |
| GSE62254_GSM1524054 | A |
| GSE62254_GSM1524055 | B |
| GSE62254_GSM1524056 | A |
| GSE62254_GSM1524057 | C |
| GSE62254_GSM1524058 | C |
| GSE62254_GSM1524059 | C |
| GSE62254_GSM1524060 | A |
| GSE62254_GSM1524061 | A |
| GSE62254_GSM1524062 | C |
| GSE62254_GSM1524068 | A |
| GSE62254_GSM1524069 | A |
| GSE62254_GSM1524070 | A |
| GSE62254_GSM1524071 | A |
| GSE62254_GSM1524072 | B |

**Supplementary Table 9: up-regulated genes and down-regulated genes in high HIscore groups.**

| **Type** | **Gene** |
| --- | --- |
| up-regulated genes | DES MYH11 ACTG2 CNN1 SYNPO2 SYNM C7 FLNC LMOD1 OGN THBS4 PLN PRUNE2 MYLK FHL1 CHRDL2 HSPB8 RBPMS2 TAGLN MYL9 ANGPTL1 BARX1 KCNMA1 SPARCL1 MRGPRF DPYSL3 MGP SFRP2 TNS1 TCEAL2 CHRDL1 SMOC2 VIP CASQ2 MSRB3 ADH1B ATP1A2 ACTA2 PRIMA1 AOC3 MYOCD APOD CCDC80 MFAP4 SPON1 CRYAB C8orf88 PDLIM3 TNC GREM1 ACKR1 SFRP4 MRVI1 CALD1 SMPX COL14A1 FLNA CPED1 CYP1B1 AKAP12 MAMDC2 PDZRN3 FERMT2 GREM2 MAP1B RNF150 SCRG1 FGF7 NEXN OMD BOC FBLN1 MIR100HG CLMP CPE PGM5-AS1 EPHA7 STON1 HAND2-AS1 DPT ABI3BP C3orf70 DDR2 RERG C14orf132 FILIP1 POPDC2 SPOCK1 PPP1R14A SMAD9 SYNC CILP CFL2 ZCCHC24 RSPO3 IL33 ASPN EFEMP1 SRPX ROR2 PDZRN4 CAP2 FNDC1 PPP1R3C BCHE DAAM2 SLIT2 CCL19 TMEM47 PRICKLE2 LDOC1 FABP4 MBNL1-AS1 BEX4 GAS1 F13A1 RCAN2 SGCD MN1 TSPAN2 SALL2 AGTR1 FRZB NDN LTBP1 FXYD6 EML1 ABCA8 COL8A1 CYBRD1 CES1 FGF2 TMEM100 SERTAD4-AS1 CSRP1 DCN INMT TUBA1A MEOX2 MPDZ RAI2 FOXF1 PALLD ASB5 NEGR1 RAB23 PTN JAM2 CCL21 TCEAL7 NRXN3 MFAP5 SETBP1 LAMA2 COL4A5 SELP REEP1 MMRN1 MXRA7 TGFB1I1 CCDC69 SGCE MOXD1 SCN7A CAV1 GPRASP1 CACNA2D1 BEX2 NBEA WASF3 STMN2 CKB ADAMTS1 BNC2 ARMCX1 TSPYL5 ANGPTL2 CRISPLD1 CYS1 CDC42EP3 AOX1 PRKAR2B FBXL7 TTLL7 LINC00702 ITIH5 GXYLT2 ZNF667-AS1 EDNRA FBLN5 C16orf89 ATP8B2 FILIP1L RBMS3 SCG2 MCAM CAPN6 GJC1 IGFBP5 KIT COLEC12 GEM IGFBP4 CLU ARMCX2 FSTL1 RGS5 NR2F1 LRRN4CL KCNJ8 PTGDS SERPINF1 HMCN1 CXCL12 FOXF2 RGS4 TUBB6 MEIS1 FIBIN PLP1 FBN1 BEX1 PDGFRL TSHZ3 RHOJ ITGA1 ISLR C1QTNF7 GHR GJA1 FRMD6 FMOD TIMP3 EMILIN1 OLFML3 TIMP2 PLXDC2 SSPN PKIA RBM24 ZFPM2 FBLN2 DACT1 HSPA2 PKD2 CBX6 SNRPN PLSCR4 GYPC NAP1L3 PDE1A TTC28 TAC1 LONRF2 ITGBL1 MID2 ITGA8 PRKD1 C11orf96 EFS MCC MYH10 FAT4 PBX3 SBSPON DZIP1 TUSC3 LPAR1 PEG3 GNAI1 GPM6B RAB9B C1S CPA3 CH25H BICC1 GLRB TRPC1 S1PR1 MAGI2-AS3 COL15A1 NAP1L2 AEBP1 ITPR1 ST6GALNAC5 ISL1 DENND5A LSAMP RUNX1T1 ZNF423 CLIP4 LUM PTPRM IL1R1 MAP9 PBX1 DKK3 CNRIP1 IGFBP7 THBS2 COL8A2 EFEMP2 SDC2 P2RY14 C20orf194 CDH11 ID4 ZNF542P SLC24A3 RAB31 DCLK1 COX7A1 RNF180 PPP2R3A PTGFR RASL12 MICU3 IGF1 FZD7 IGFBP6 CGNL1 MEIS3P1 LAMC1 GFPT2 NDNF GPR155 SCN4B C1R ENOX1 MAGEH1 PKIG GPX3 TSPAN7 ZNF521 LRCH2 TMEM119 PRRX1 MYEF2 FAM13C MEF2C LARP6 HEG1 ARNT2 COL6A3 SERPING1 FMO2 SMARCA1 GLT8D2 EBF1 COL3A1 FAXC OLFML1 PLEKHO1 PCDHB5 MEOX1 ANO5 PFN2 KLHL5 CLEC3B RASSF2 EMCN VLDLR CFH GNG11 TCEAL3 SH3RF3 SULF1 SH3BGRL FAM229B GABARAPL1 CYYR1 RIMKLB ECM2 LRRC32 NXN LTBP2 ACTC1 VGLL3 C1QTNF2 FLRT2 KCTD12 ROBO1 SLC16A7 CSRP2 TGFBI DIRAS3 SLCO2A1 ZNF331 PCDH18 MAN1C1 APCDD1 OLFML2B TYRP1 KCNS3 ZNF880 PTX3 TCF4 PRICKLE1 ZNF25 WLS TCF21 EFHD1 ZDBF2 CHL1 COL16A1 VCAN MDFIC HTRA1 NAP1L5 PDGFRB NR3C1 KL GLIPR1 CD302 C3 APLNR ITM2A ROR1 MLLT11 GLIS2 F8 THBD ELOVL4 NUDT11 EGR3 GSPT2 HGF FHOD3 APOLD1 ANKRD35 SEMA3G FAM162B RBP7 PCSK1 BGN PROS1 AP1S2 PABPC4L LOXL1 MATN3 CD93 PCP4 GPX7 UBE2E2 CCL11 MLF1 GPR183 EID1 MS4A1 EPDR1 GAPT VIM VEGFC AMPH CNTN4 GPX8 VANGL2 COL1A2 SHISA2 CPQ CYTL1 SPARC ZNF415 CCDC50 SACS NR2F1-AS1 CADM1 CTSK CHN1 DOK5 DNM3OS LPL CDKN1C COL21A1 LBH THY1 PXDN CCDC3 PDGFC ANGPT1 CLIC2 AGT A2M-AS1 HSD11B1 CDH5 ECSCR ZNF518B CD200 ZNF662 ABCA6 WWC3 PCOLCE SCRN1 RAI14 ARHGEF6 TFPI2 RARRES2 TPST1 COL5A1 NIPSNAP3B GPR34 SELE LINC01082 CSGALNACT1 LGALS1 PCDH17 JAZF1 NID2 TRIL FAP GLIPR2 HTR2B EDNRB FAM117A KLHL13 COL4A1 TMEM150C CLGN THSD7A VAT1L FRY GIMAP6 SLC16A4 WNT2B TCEAL4 BNIP3 EPB41L3 CCL2 ENTPD1 TTC7B ZBTB20 LRP12 RBMS1 PHC1 RSPO2 FMO1 FIGN ADRB2 VASN WFDC1 SNAI2 GGTA1P SCG5 HSD17B6 PLAGL1 CCL14 |
| down-regulated genes | MMP12 CCL20 LCN2 SFN PDZK1IP1 TRIM15 CXCL3 TMEM45B PRSS3 PCSK9 CDT1 UBE2C MUC13 GPA33 MYBL2 PKP3 KRT19 CDCA7 RECQL4 TRIM31 CDH1 CDC20 SAPCD2 RRM2 ASF1B PLEK2 PBK ETV7 PKMYT1 CDC45 AURKB BIK CDCA8 KRT8 MYB PHLDA2 TPX2 GOLT1A PSAT1 CENPM IL22RA1 DEGS2 SKA3 KIF2C CDC6 FOXM1 TK1 GINS2 OVOL1 PTTG1 GSDMB UBE2T HPDL CDC42EP5 LAD1 PTPRH TMPRSS4 NCAPH TROAP B3GNT3 KDF1 BIRC5 KRT18 PRR15L PCNA CCNB1 STAP2 CDCA5 PLK1 CKS2 KIFC1 CCNO CCNA2 ZWINT MST1R CENPA SULT2B1 CBLC TOP2A TAP1 KIF18B CEP55 KRTCAP3 LAMB3 CDC25A EPS8L1 RAB25 ST14 ATP10B KLF5 HJURP HMGA1 HNF4A NCAPG SLC22A18 POC1A LRG1 DDC USH1C BAIAP2L2 DHCR24 ORC1 MYO1A FAM83H AGMAT TJP3 NEK2 ESRP2 MCM2 GINS1 E2F8 MCM4 ELF3 PSMB9 CDCP1 CDK1 IFI27 SMPD3 MND1 MKI67 EPS8L3 ESPL1 MARVELD3 PRR15 RAD54L SCD AURKA PPP1R14D MELK BCL2L15 DLGAP5 TTK BATF2 CDCA2 FERMT1 GTSE1 SLC4A11 SLC25A10 DEPDC1B NOX1 JUP RAD51AP1 CENPW ELMO3 AP1M2 MYH14 KIF4A SPC25 MCM10 MTFR2 POF1B MAD2L1 HSD11B2 OR7E14P CDS1 BUB1B CDCA3 LMNB1 KIF11 SLC27A2 RCC1 CDKN3 MISP MACC1 HMMR FUT2 EVPL PSMB8 TACC3 AMN IL32 RAPGEFL1 SMAGP TYMS NUF2 TMEM54 SPAG5 MAP7 CENPF CES2 TRIP13 METTL7B CLDN7 KCNK1 FXYD3 RASSF7 KIF23 CASP5 CDC25B AGPAT2 FANCA SLCO4A1 PSMB10 CRB3 BRI3BP EPCAM CLDN4 ANLN ADAP1 UHRF1 PRRG4 FAM83B NUSAP1 TMEM171 PAFAH1B3 SGPP2 HNF4G PLS1 GZMB CCNF EZH2 CDH3 ANKRD22 SNRPB PLK4 DTL RNASEH2A POLQ TOMM40 MCM7 SKA1 TFAP2A RPS6KA1 SLC9A3R1 MNX1 ARHGAP11A HKDC1 RBM47 ORC6 KIF15 NAPRT FAAH DEPDC1 SH3RF2 KIF18A AP1S1 MTFP1 ASPM CHMP4C CENPU TMEM125 SLC52A3 PDSS1 USP43 GRB7 ABHD11 MAPK13 RMI2 LLGL2 WDR34 TMEM139 FEN1 MROH6 UBE2S TSTA3 RAD51 SLC25A22 EZR SLC52A2 TSPO PLEKHG6 CFB HOOK1 CKS1B CORO2A NME1 MRPL12 ZNF296 ESCO2 OAS1 CENPN RSPH1 OPLAH THEM6 PPP1R16A HOXA11 TRABD2A CDC42EP1 FANCI SLC1A5 AUNIP CKMT1A TMPRSS2 SLC39A4 CDC25C OIP5 XDH GPR35 BAIAP2L1 PRC1 EXO1 HOXB13 CENPE NCAPG2 GMNN IRF6 CKAP2L SPINT2 HMGB3 KPNA2 ECT2 YDJC SEMA4G PLCB3 PSRC1 CENPH CHTF18 F12 CHAF1B SHMT2 STIL PRKCZ TPRN TMC5 EPHA1 KIF20A BSPRY RHPN2 E2F7 SNRPF HMBS MPST DSG2 RACGAP1 LSR BOP1 CALML4 HELLS MCM5 GRHL2 ZNF367 CNKSR1 RFC3 TYMSOS EFNA4 CMTM8 CHAF1A |

**Supplementary Table 10: GSEA results between hypoxia and normoxia gastric cancer cell lines in GSE114083.**

| **NAME** | **SIZE** | **ES** | **NES** | **NOM p-val** | **FDR q-val** | **FWER p-val** |
| --- | --- | --- | --- | --- | --- | --- |
| MAINA HYPOXIA VHL TARGETS UP | 5 | 0.8373096 | 1.496419 | 0 | 0.081444375 | 0.271 |
| MIZUKAMI HYPOXIA UP | 12 | 0.63184345 | 1.3234274 | 0.035343036 | 0.21728398 | 0.585 |
| QI HYPOXIA | 131 | 0.6436347 | 1.6252364 | 0 | 0.04753186 | 0.053 |
| MENSE HYPOXIA UP | 94 | 0.7461709 | 1.5527103 | 0 | 0.054338243 | 0.14 |
| MANALO HYPOXIA UP | 201 | 0.612892 | 1.5352091 | 0 | 0.06806009 | 0.171 |
| WACKER HYPOXIA TARGETS OF VHL | 12 | 0.91752976 | 1.6292423 | 0 | 0.052620504 | 0.053 |
| ELVIDGE HYPOXIA UP | 167 | 0.7567623 | 1.7080352 | 0 | 0.10652308 | 0.025 |
| ELVIDGE HYPOXIA BY DMOG UP | 129 | 0.7838595 | 1.6815064 | 0 | 0.0870615 | 0.053 |
| HARRIS HYPOXIA | 79 | 0.6242234 | 1.4466386 | 0 | 0.12758365 | 0.4 |
| LEONARD HYPOXIA | 39 | 0.7264461 | 1.5284367 | 0.030364372 | 0.061655704 | 0.184 |
| FARDIN HYPOXIA 11 | 32 | 0.8445155 | 1.5826164 | 0 | 0.045976255 | 0.08 |
| KIM HYPOXIA | 15 | 0.8377595 | 1.4188496 | 0 | 0.1571642 | 0.492 |
| FARDIN HYPOXIA 9 | 7 | 0.84813917 | 1.5336927 | 0 | 0.06509074 | 0.184 |
